# Supplementary material for: Iron(iii)-catalyzed tandem annulation of indolyl-substituted p-quinone methides with ynamides for the synthesis of cyclopenta[b]indoles
Source: Royal Society of Chemistry journal article supplement (doi:10.1039/d2cc03252j), 2022-01-01

## ELECTRONIC SUPPLEMENTARY MATERIAL

### Iron(III)-catalyzed tandem annulation of indolyl-substituted *p*-quinone methides with ynamides for the synthesis of cyclopenta[*b*]indoles

Ke-Yin Yu, Xiao-Min Ge, Yi-Jun Fan, Xiao-Tao Liu, Xue Yang, Yu-Han Yang, Xian-He Zhao, Xian-Tao An\*,  
and Chun-An Fan\*

*State Key Laboratory of Applied Organic Chemistry, College of Chemistry and Chemical Engineering,  
Lanzhou University, 222 Tianshui Nanlu, Lanzhou 730000, China.*

#### Table of Contents

|                                                                                                                                                                  |     |
|------------------------------------------------------------------------------------------------------------------------------------------------------------------|-----|
| General.....                                                                                                                                                     | S1  |
| 1. Preparation of Indolyl-Substituted <i>p</i> -Quinone Methides .....                                                                                           | S2  |
| 2. Preparation of Ynamides.....                                                                                                                                  | S7  |
| 3. Tandem (2+2) Annulation/ <i>retro</i> -4 $\pi$ Electrocyclization/Imino-Nazarov Cyclization Reaction of Indolyl-Substituted <i>p</i> -QMs with Ynamides ..... | S8  |
| 3.1. General Procedure for Tandem Annulation.....                                                                                                                | S8  |
| 3.2. Spectroscopic Data for Aminocyclopenta[ <i>b</i> ]indoles <b>3</b> .....                                                                                    | S8  |
| 3.3. General Procedure for Synthesis of <b>3aa</b> on Gram Scale.....                                                                                            | S19 |
| 4. Oxidative Desulfonation of <b>3aa</b> .....                                                                                                                   | S20 |
| 5. Variable Temperature NMR Experiments of Atropisomer <b>3ab</b> .....                                                                                          | S21 |
| 6. Determination of the Structure of Products .....                                                                                                              | S22 |
| 6.1. X-Ray Crystallographic Data of Compound <b>3ac</b> .....                                                                                                    | S22 |
| 6.2. X-Ray Crystallographic Data of Compound <b>3ca</b> .....                                                                                                    | S24 |
| 6.3. X-Ray Crystallographic Data of Compound <b>3da</b> .....                                                                                                    | S26 |
| 6.4. X-Ray Crystallographic Data of Compound <b>3ea</b> .....                                                                                                    | S28 |
| 6.5. X-Ray Crystallographic Data of Compound <b>3fa</b> .....                                                                                                    | S30 |
| 6.6. X-Ray Crystallographic Data of Compound <b>3ia</b> .....                                                                                                    | S32 |
| 7. References.....                                                                                                                                               | S34 |
| 8. Copies of NMR Spectra .....                                                                                                                                   | S34 |

## General

All moisture or oxygen-sensitive reactions were carried out under an argon atmosphere in oven flasks. The solvent used was purified by distillation over the drying agent indicated and was transferred under argon: THF (Na). All reactions were monitored by thin-layer chromatography (TLC) on silica gel F<sub>254</sub> plates using UV light as visualizing agent (if applicable). The products were purified by flash column chromatography on silica gel (200–300 meshes) from the Anhui Liangchen Silicon Material Company in China.

<sup>1</sup>H NMR and <sup>13</sup>C NMR spectra were recorded in CDCl<sub>3</sub> or (CD<sub>3</sub>)<sub>2</sub>SO on Bruker AVANCE<sup>III</sup> 400 MHz, Bruker AVANCE<sup>III</sup> HD 400 MHz or Bruker AVANCE NEO 600 MHz instrument. Chemical shifts were denoted in ppm ( $\delta$ ) and calibrated by using residual undeuterated solvent (7.26 ppm for residual undeuterated CDCl<sub>3</sub>, 2.50 ppm for residual undeuterated (CD<sub>3</sub>)<sub>2</sub>SO or tetramethylsilane (0.00 ppm)) as internal reference for <sup>1</sup>H NMR and the deuterated solvent (CDCl<sub>3</sub> (77.00 ppm), (CD<sub>3</sub>)<sub>2</sub>SO (39.50 ppm) or tetramethylsilane (0.00 ppm)) as internal standard for <sup>13</sup>C NMR. The following abbreviations were used to explain the multiplicities: s = singlet, d = doublet, t = triplet, q = quartet, dd = double doublet, br = broad, m = multiplet. The high-resolution mass spectral analysis (HRMS) data were measured on a Bruker ApexII mass spectrometer by means of the ESI technique. The IR spectra were recorded on a Nicolet Nexus 670 FT-IR spectrometer. The X-ray single-crystal determination was performed on an Agilent SuperNova or a Rigaku XtaLAB Synergy R single crystal diffractometer. The melting points were measured on a Kolfer melting point apparatus without calibration (Beijing Tech Instrument Co., LTD).

## 1. Preparation of Indolyl-Substituted *p*-Quinone Methides

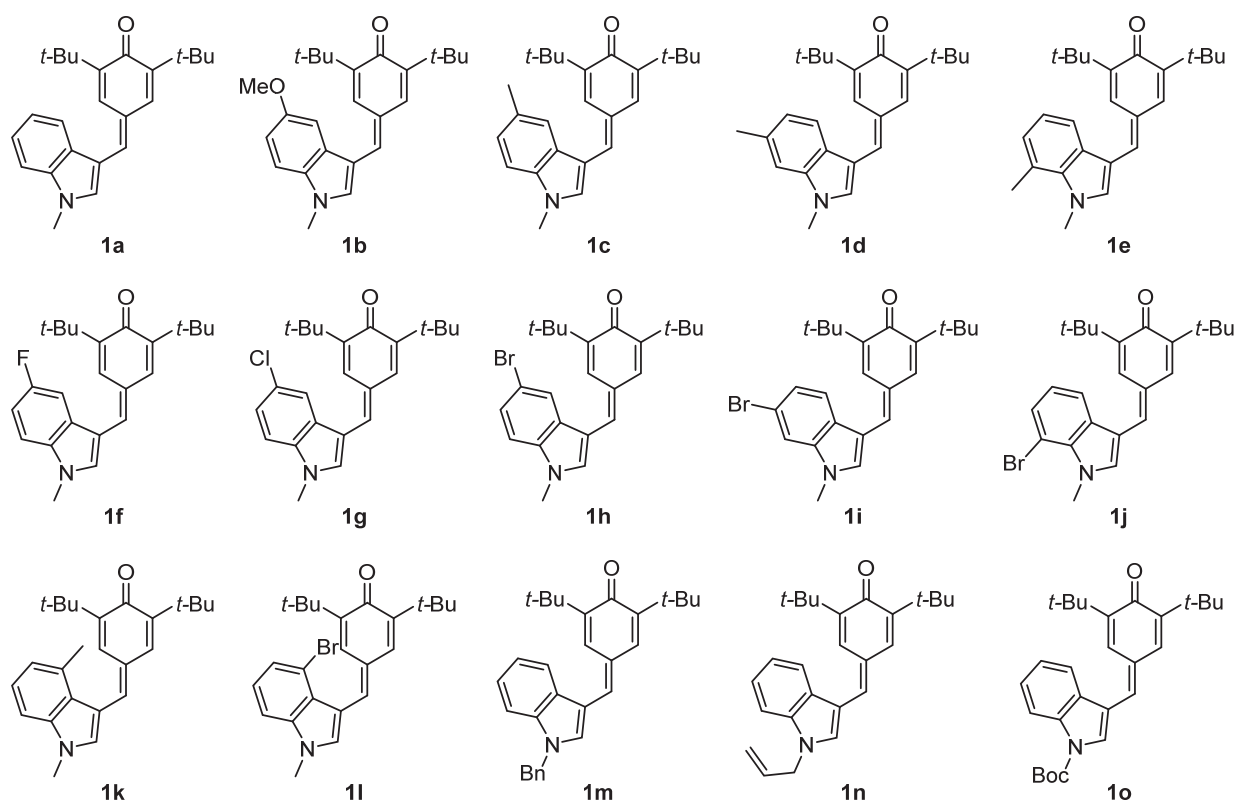

**Figure S1.** Indolyl-substituted *p*-quinone methides employed in tandem reaction

The indolyl-substituted *p*-quinone methides **1a–1o**<sup>1</sup> were prepared according to the reported methods. The General Procedure was as follows:

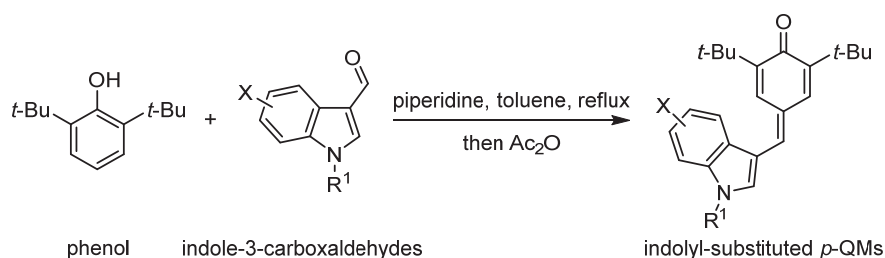

In a Dean-Stark apparatus, the solution of 2,6-di-*tert*-butylphenol (20 mmol) and indole-3-carboxaldehydes (20 mmol) in toluene was heated to reflux for 1 h. Piperidine (40 mmol) was added dropwise via the syringe within 2 h and then held to reflux for 12 h. After cooling just below the boiling point of the reaction mixture, acetic anhydride (40 mmol) was added and stirred for 0.5 h. Then the mixture was poured into ice-water and extracted with CH<sub>2</sub>Cl<sub>2</sub>. The combined organic phases were dried over Na<sub>2</sub>SO<sub>4</sub>. After filtration, the filtrate was concentrated under reduced pressure. The crude products were purified by flash column chromatography on silica gel with the elution of petroleum ether/ethyl acetate to give the corresponding indolyl-substituted *p*-quinone methides **1a–1o**.

### 2,6-Di-*tert*-butyl-4-((1-methyl-1*H*-indol-3-yl) methylene) cyclohexa-2,5-dien-1-one

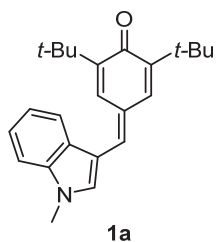

**1a**

**1a:**  $^1\text{H NMR}$  (600 MHz,  $\text{CDCl}_3$ )  $\delta$  = 7.79 (d,  $J$  = 8.4 Hz, 1H), 7.71 (d,  $J$  = 2.4 Hz, 1H), 7.46 (s, 1H), 7.41–7.36 (m, 2H), 7.36–7.32 (m, 1H), 7.30–7.25 (m, 1H), 7.11 (d,  $J$  = 1.8 Hz, 1H), 3.89 (s, 3H), 1.375 (s, 9H), 1.367 (s, 9H) ppm.  $^{13}\text{C NMR}$  (150 MHz,  $\text{CDCl}_3$ )  $\delta$  = 186.3, 148.0, 145.9, 137.0, 135.4, 134.8, 131.4, 128.1, 128.0, 127.9, 123.4, 121.3, 119.2, 112.9, 109.9, 35.4, 34.9, 33.6, 29.7, 29.6 ppm. **IR**

(film):  $\bar{\nu}$  = 3444, 2953, 1620, 1548, 1513, 1485, 1358, 1292, 1246, 1117, 1041, 950  $\text{cm}^{-1}$ .

### 2,6-Di-*tert*-butyl-4-((5-methoxy-1-methyl-1*H*-indol-3-yl) methylene) cyclohexa-2,5-dien-1-one

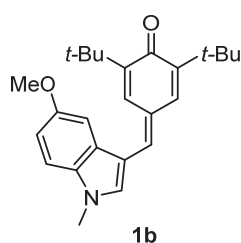

**1b**

**1b:**  $^1\text{H NMR}$  (400 MHz,  $\text{CDCl}_3$ )  $\delta$  = 7.69 (d,  $J$  = 2.4 Hz, 1H), 7.43 (s, 1H), 7.33 (s, 1H), 7.24 (d,  $J$  = 2.4 Hz, 1H), 7.21 (d,  $J$  = 2.0 Hz, 1H), 7.12 (d,  $J$  = 2.4 Hz, 1H), 6.98 (dd,  $J$  = 8.8, 2.4 Hz, 1H), 3.90 (s, 3H), 3.86 (s, 3H), 1.374 (s, 9H), 1.368 (s, 9H) ppm.  $^{13}\text{C NMR}$  (100 MHz,  $\text{CDCl}_3$ )  $\delta$  = 186.3, 155.6, 147.9, 145.7, 135.4, 134.9, 132.2, 131.7, 128.8, 127.9, 127.4, 113.6, 112.5, 110.8, 100.8, 55.8,

35.4, 34.9, 33.7, 29.7, 29.6 ppm. **IR** (film):  $\bar{\nu}$  = 3444, 2920, 2093, 1643, 1513, 1358, 1292, 1245, 1117, 1043  $\text{cm}^{-1}$ .

### 2,6-Di-*tert*-butyl-4-((1,5-dimethyl-1*H*-indol-3-yl) methylene) cyclohexa-2,5-dien-1-one

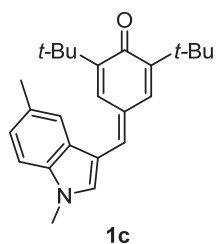

**1c**

**1c:**  $^1\text{H NMR}$  (400 MHz,  $\text{CDCl}_3$ )  $\delta$  = 7.70 (d,  $J$  = 2.4 Hz, 1H), 7.58 (s, 1H), 7.39 (s, 1H), 7.33 (s, 1H), 7.22 (d,  $J$  = 8.4 Hz, 1H), 7.13 (dd,  $J$  = 8.4, 1.2 Hz, 1H), 7.09 (d,  $J$  = 2.4 Hz, 1H), 3.80 (s, 3H), 2.48 (s, 3H), 1.38 (s, 9H), 1.37 (s, 9H) ppm.  $^{13}\text{C NMR}$  (100 MHz,  $\text{CDCl}_3$ )  $\delta$  = 186.2, 147.6, 145.6, 135.48, 135.46, 135.2, 131.6, 130.8, 128.2, 128.1, 127.4, 124.9, 119.0, 112.5, 109.6, 35.3, 34.8, 33.5, 29.6, 29.5, 21.5 ppm. **IR** (film):  $\bar{\nu}$  = 3444, 2954, 2090, 1627, 1549, 1514, 1485, 1357, 1247,

1119  $\text{cm}^{-1}$ .

### 2,6-Di-*tert*-butyl-4-((1,6-dimethyl-1*H*-indol-3-yl) methylene) cyclohexa-2,5-dien-1-one

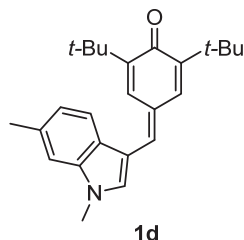

**1d**

**1d:**  $^1\text{H NMR}$  (400 MHz,  $\text{CDCl}_3$ )  $\delta$  = 7.71 (d,  $J$  = 2.4 Hz, 1H), 7.68 (d,  $J$  = 2.4 Hz, 1H), 7.40 (s, 1H), 7.36 (s, 1H), 7.16 (s, 1H), 7.14–7.07 (m, 2H), 3.85 (s, 3H), 2.52 (s, 3H), 1.37 (s, 9H), 1.36 (s, 9H) ppm.  $^{13}\text{C NMR}$  (100 MHz,  $\text{CDCl}_3$ )  $\delta$  = 186.3, 147.8, 145.8, 137.5, 135.5, 135.1, 133.4, 131.1, 128.0, 127.7, 125.9, 123.1, 118.9, 112.9, 109.9, 35.4, 34.9, 33.5, 29.7, 29.6, 21.8 ppm. **IR** (film):  $\bar{\nu}$

= 3441, 2954, 2079, 1625, 1548, 1515, 1466, 1357, 1305, 1248, 1116  $\text{cm}^{-1}$ .

### 2,6-Di-*tert*-butyl-4-((1,7-dimethyl-1*H*-indol-3-yl) methylene) cyclohexa-2,5-dien-1-one

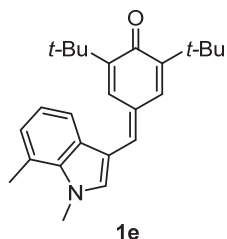

1e

**1e:**  $^1\text{H NMR}$  (400 MHz,  $\text{CDCl}_3$ )  $\delta$  = 7.68 (d,  $J$  = 2.4 Hz, 1H), 7.62 (d,  $J$  = 8.0 Hz, 1H), 7.35 (s, 2H), 7.40–7.32 (m, 2H), 7.02 (d,  $J$  = 6.8 Hz, 1H), 4.14 (s, 3H), 2.78 (s, 3H), 1.37 (s, 9H), 1.36 (s, 9H) ppm.  $^{13}\text{C NMR}$  (100 MHz,  $\text{CDCl}_3$ )  $\delta$  = 186.3, 147.9, 145.8, 135.7, 135.4, 134.7, 133.0, 129.3, 128.0, 127.9, 126.1, 121.9, 121.5, 117.1, 112.5, 37.7, 35.4, 34.9, 29.7, 29.6, 19.6 ppm. **IR** (film):  $\bar{\nu}$  = 3444, 2946,

2064, 1634, 1545, 1453, 1357, 1252, 1077, 953, 744  $\text{cm}^{-1}$ .

### 2,6-Di-*tert*-butyl-4-((5-fluoro-1-methyl-1*H*-indol-3-yl) methylene) cyclohexa-2,5-dien-1-one

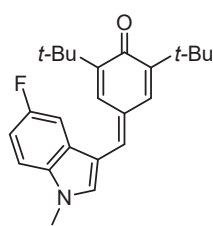

1f

**1f:**  $^1\text{H NMR}$  (400 MHz,  $\text{CDCl}_3$ )  $\delta$  = 7.65 (d,  $J$  = 2.0 Hz, 1H), 7.48 (s, 1H), 7.42 (dd,  $J$  = 9.2, 2.4 Hz, 1H), 7.28 (dd,  $J$  = 8.8, 4.0 Hz, 1H), 7.24 (s, 1H), 7.11–7.03 (m, 2H), 3.88 (s, 3H), 1.37 (s, 9H), 1.36 (s, 9H) ppm.  $^{13}\text{C NMR}$  (100 MHz,  $\text{CDCl}_3$ )  $\delta$  = 186.3, 158.9 (d,  $^1J_{\text{C-F}}$  = 236.6 Hz), 148.1, 146.0, 135.3, 134.0, 133.6, 132.6, 128.7 (d,  $^3J_{\text{C-F}}$  = 9.6 Hz), 128.0, 127.8, 112.7 (d,  $^4J_{\text{C-F}}$  = 4.6 Hz), 111.7 (d,  $^2J_{\text{C-F}}$  = 26.2 Hz), 110.8 (d,  $^3J_{\text{C-F}}$  = 9.7 Hz), 104.5 (d,  $^2J_{\text{C-F}}$  = 24.1 Hz), 35.4, 34.9, 33.8,

29.6, 29.5 ppm. **IR** (film):  $\bar{\nu}$  = 3444, 2090, 1633, 1553, 1482, 1288, 1111, 1021, 952  $\text{cm}^{-1}$ .

### 2,6-Di-*tert*-butyl-4-((5-chloro-1-methyl-1*H*-indol-3-yl) methylene) cyclohexa-2,5-dien-1-one

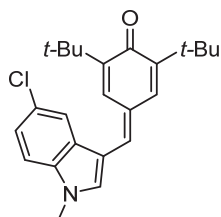

1g

**1g:**  $^1\text{H NMR}$  (400 MHz,  $\text{CDCl}_3$ )  $\delta$  = 7.76–7.73 (m, 1H), 7.64 (d,  $J$  = 2.4 Hz, 1H), 7.44 (s, 1H), 7.29–7.25 (m, 2H), 7.23 (s, 1H), 7.07 (d,  $J$  = 2.4 Hz, 1H), 3.87 (s, 3H), 1.37 (s, 9H), 1.36 (s, 9H) ppm.  $^{13}\text{C NMR}$  (100 MHz,  $\text{CDCl}_3$ )  $\delta$  = 186.3, 148.2, 146.2, 135.4, 135.3, 133.6, 132.2, 129.0, 128.4, 127.8, 127.3, 123.6, 118.9, 112.4, 111.0, 35.4, 34.9, 33.7, 29.6, 29.5 ppm. **IR** (film):  $\bar{\nu}$  = 3444, 2954, 2082,

1626, 1551, 1515, 1470, 1358, 1285, 1246, 1125, 728  $\text{cm}^{-1}$ .

### 4-((5-Bromo-1-methyl-1*H*-indol-3-yl) methylene)-2,6-di-*tert*-butylcyclohexa-2,5-dien-1-one

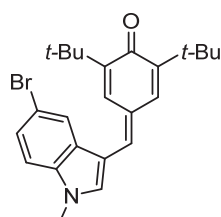

1h

**1h:**  $^1\text{H NMR}$  (400 MHz,  $\text{CDCl}_3$ )  $\delta$  = 7.89 (d,  $J$  = 1.2 Hz, 1H), 7.63 (d,  $J$  = 2.0 Hz, 1H), 7.41 (s, 1H), 7.37 (dd,  $J$  = 8.8, 1.6 Hz, 1H), 7.20 (d,  $J$  = 9.2 Hz, 2H), 7.07 (d,  $J$  = 2.0 Hz, 1H), 3.85 (s, 3H), 1.37 (s, 9H), 1.36 (s, 9H) ppm.  $^{13}\text{C NMR}$  (100 MHz,  $\text{CDCl}_3$ )  $\delta$  = 186.3, 148.2, 146.1, 135.7, 135.2, 133.6, 132.1, 129.5, 128.4, 127.8, 126.1, 122.0, 114.7, 112.3, 111.4, 35.4, 34.9, 33.7, 29.6, 29.5 ppm. **IR** (film):  $\bar{\nu}$  =

3362, 2954, 1602, 1550, 1516, 1469, 1355, 1284, 1253, 1125, 946, 855, 817, 620  $\text{cm}^{-1}$ .

#### 4-((6-Bromo-1-methyl-1*H*-indol-3-yl) methylene)-2,6-di-*tert*-butylcyclohexa-2,5-dien-1-one

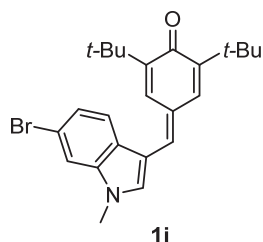

**1i:**  $^1\text{H NMR}$  (400 MHz,  $\text{CDCl}_3$ )  $\delta$  = 7.66–7.60 (m, 2H), 7.52 (d,  $J$  = 1.6 Hz, 1H), 7.41 (s, 1H), 7.35 (dd,  $J$  = 8.4, 1.6 Hz, 1H), 7.27 (s, 1H), 7.08 (d,  $J$  = 2.4 Hz, 1H), 3.85 (s, 3H), 1.362 (s, 9H), 1.356 (s, 9H) ppm.  $^{13}\text{C NMR}$  (100 MHz,  $\text{CDCl}_3$ )  $\delta$  = 186.4, 148.3, 146.2, 137.8, 135.3, 133.7, 131.6, 128.6, 127.7, 126.8, 124.4, 120.5, 116.9, 113.0, 112.9, 35.4, 34.9, 33.6, 29.6, 29.5 ppm. **IR** (film):

$\bar{\nu}$  = 3396, 2955, 1611, 1550, 1515, 1468, 1359, 1297, 1243, 1129, 1057, 1030, 844, 801, 739  $\text{cm}^{-1}$ .

#### 4-((7-Bromo-1-methyl-1*H*-indol-3-yl) methylene)-2,6-di-*tert*-butylcyclohexa-2,5-dien-1-one

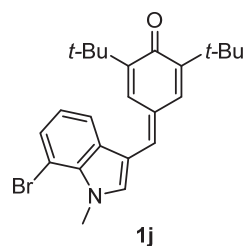

**1j:**  $^1\text{H NMR}$  (400 MHz,  $\text{CDCl}_3$ )  $\delta$  = 7.69 (dd,  $J$  = 8.0, 0.8 Hz, 1H), 7.63 (d,  $J$  = 2.4 Hz, 1H), 7.45 (d,  $J$  = 7.2 Hz, 1H), 7.37 (s, 1H), 7.28 (s, 1H), 7.09 (d,  $J$  = 2.0 Hz, 1H), 7.06 (t,  $J$  = 8.0 Hz, 1H), 4.25 (s, 3H), 1.362 (s, 9H), 1.356 (s, 9H) ppm.  $^{13}\text{C NMR}$  (100 MHz,  $\text{CDCl}_3$ )  $\delta$  = 186.4, 148.4, 146.3, 135.2, 133.8, 133.5, 133.3, 131.1, 128.8, 128.3, 127.8, 122.2, 118.4, 112.3, 104.5, 37.8, 35.4, 34.9,

29.6, 29.5 ppm. **IR** (film):  $\bar{\nu}$  = 3426, 2948, 1550, 1521, 1451, 1301, 1128, 1076, 1019, 946, 799, 776, 733  $\text{cm}^{-1}$ .

#### 2,6-Di-*tert*-butyl-4-((1,4-dimethyl-1*H*-indol-3-yl) methylene) cyclohexa-2,5-dien-1-one

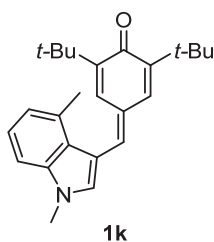

**1k:**  $^1\text{H NMR}$  (400 MHz,  $\text{CDCl}_3$ )  $\delta$  = 7.69 (s, 1H), 7.67–7.63 (m, 1H), 7.31 (s, 1H), 7.24–7.18 (m, 2H), 7.12–7.06 (m, 1H), 7.04–6.97 (m, 1H), 3.86 (s, 3H), 2.78 (s, 3H), 1.37 (s, 9H), 1.36 (s, 9H) ppm.  $^{13}\text{C NMR}$  (100 MHz,  $\text{CDCl}_3$ )  $\delta$  = 186.6, 148.1, 145.9, 138.1, 137.6, 135.1, 132.2, 131.7, 128.3, 128.1, 126.4, 123.3, 123.1, 114.0, 107.9, 35.3, 34.9, 33.6, 29.7, 29.6, 21.2 ppm. **IR** (film):  $\bar{\nu}$  = 3440, 2954, 1634,

1545, 1517, 1460, 1355, 1300, 1252, 1072, 909, 744  $\text{cm}^{-1}$ .

#### 4-((4-Bromo-1-methyl-1*H*-indol-3-yl) methylene)-2,6-di-*tert*-butylcyclohexa-2,5-dien-1-one

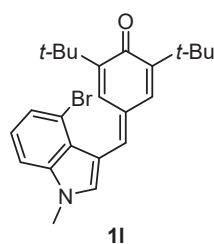

**1l:**  $^1\text{H NMR}$  (400 MHz,  $\text{CDCl}_3$ )  $\delta$  = 8.14 (s, 1H), 7.60 (d,  $J$  = 2.4 Hz, 1H), 7.40 (d,  $J$  = 7.6 Hz, 1H), 7.32 (d,  $J$  = 8.8 Hz, 2H), 7.18–7.10 (m, 2H), 3.88 (s, 3H), 1.36 (s, 9H), 1.35 (s, 9H) ppm.  $^{13}\text{C NMR}$  (100 MHz,  $\text{CDCl}_3$ )  $\delta$  = 186.7, 148.3, 146.1, 138.4, 136.4, 135.3, 132.9, 128.3, 127.9, 125.8, 125.6, 123.9, 114.8, 113.3, 109.3,

35.3, 34.9, 33.7, 29.6, 29.5 ppm. **IR** (film):  $\bar{\nu}$  = 3404, 2954, 1603, 1546, 1518, 1449, 1358, 1296, 1131, 1019, 946, 735  $\text{cm}^{-1}$ .

#### 4-((1-Benzyl-1*H*-indol-3-yl) methylene)-2,6-di-*tert*-butylcyclohexa-2,5-dien-1-one

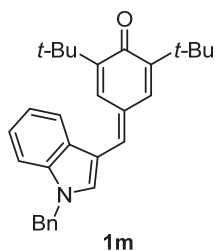

**1m:**  $^1\text{H NMR}$  (400 MHz,  $\text{CDCl}_3$ )  $\delta$  = 7.84–7.78 (m, 1H), 7.61 (d,  $J$  = 2.0 Hz, 1H), 7.45 (s, 1H), 7.41–7.38 (m, 2H), 7.38–7.32 (m, 3H), 7.32–7.21 (m, 4H), 7.10 (d,  $J$  = 2.4 Hz, 1H), 5.36 (s, 2H), 1.35 (s, 9H), 1.29 (s, 9H) ppm.  $^{13}\text{C NMR}$  (100 MHz,  $\text{CDCl}_3$ )  $\delta$  = 186.3, 148.0, 146.0, 136.7, 135.6, 135.2, 134.5, 130.6, 129.1, 128.4 (2C), 128.3, 128.0, 127.5, 123.5, 121.5, 119.3, 113.3, 110.3, 50.7, 35.4, 34.9,

29.57, 29.56 ppm. **IR** (film):  $\bar{\nu}$  = 3409, 2920, 1632, 1551, 1514, 1468, 1387, 1358, 1088, 1043, 1020  $\text{cm}^{-1}$ .

#### 4-((1-Allyl-1*H*-indol-3-yl) methylene)-2,6-di-*tert*-butylcyclohexa-2,5-dien-1-one

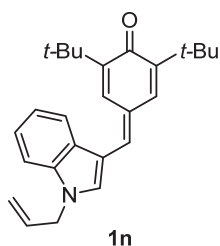

**1n:**  $^1\text{H NMR}$  (400 MHz,  $\text{CDCl}_3$ )  $\delta$  = 7.80 (d,  $J$  = 7.6 Hz, 1H), 7.70 (d,  $J$  = 2.4 Hz, 1H), 7.52 (s, 1H), 7.41–7.36 (m, 2H), 7.35–7.30 (m, 1H), 7.30–7.24 (m, 1H), 7.11 (d,  $J$  = 2.4 Hz, 1H), 6.11–5.99 (m, 1H), 5.32 (d,  $J$  = 10.4 Hz, 1H), 5.22 (d,  $J$  = 17.2 Hz, 1H), 4.80 (d,  $J$  = 5.6 Hz, 2H), 1.364 (s, 9H), 1.361 (s, 9H) ppm.  $^{13}\text{C NMR}$  (100 MHz,  $\text{CDCl}_3$ )  $\delta$  = 186.4, 148.0, 146.0, 136.5, 135.3, 134.6, 132.2,

130.4, 128.3, 128.2, 128.1, 123.4, 121.4, 119.3, 118.7, 113.2, 110.2, 49.3, 35.4, 34.9, 29.60, 29.56 ppm. **IR** (film):  $\bar{\nu}$  = 3444, 2956, 2079, 1634, 1551, 1516, 1472, 1354, 1246, 1121  $\text{cm}^{-1}$ .

#### *tert*-Butyl 3-((3,5-di-*tert*-butyl-4-oxocyclohexa-2,5-dien-1-ylidene) methyl)-1*H*-indole-1-carboxylate

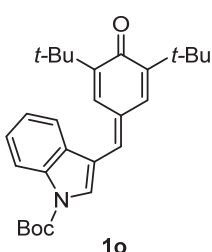

**1o:**  $^1\text{H NMR}$  (600 MHz,  $\text{CDCl}_3$ )  $\delta$  = 8.22 (d,  $J$  = 7.2 Hz, 1H), 7.93 (s, 1H), 7.73–7.68 (m, 2H), 7.41 (t,  $J$  = 7.2 Hz, 1H), 7.34 (t,  $J$  = 7.2 Hz, 1H), 7.23 (s, 1H), 7.10 (d,  $J$  = 1.8 Hz, 1H), 1.70 (s, 9H), 1.358 (s, 9H), 1.355 (s, 9H) ppm.  $^{13}\text{C NMR}$  (150 MHz,  $\text{CDCl}_3$ )  $\delta$  = 186.7, 149.0, 148.9, 147.2, 135.3, 134.7, 131.8 (2C), 129.6, 127.7, 127.1, 125.5, 123.5, 119.0, 116.9, 115.4, 84.7, 35.5, 35.0, 29.5 (2C), 28.1 ppm. **IR** (film):  $\bar{\nu}$  = 3443, 2958, 2074, 1633, 1447, 1376, 1173, 1137, 1095, 1021

$\text{cm}^{-1}$ .

## 2. Preparation of Ynamides

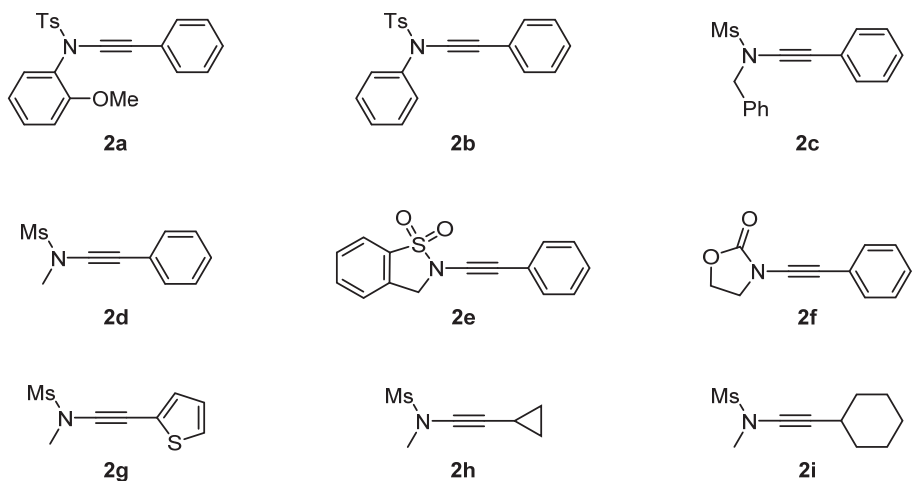

**Figure S2.** Ynamides employed in tandem reaction

The ynamides **2a–2c**<sup>2a</sup>, **2d**<sup>2b</sup>, **2e**<sup>2c</sup>, **2f**<sup>2d</sup>, **2g–2h**<sup>2e</sup>, and **2i**<sup>2f</sup> were prepared according to the reported methods.



### 3. Tandem (2+2) Annulation/*retro*-4 $\pi$ Electrocyclization/Imino-Nazarov Cyclization Reaction of Indolyl-Substituted *p*-QMs with Ynamides

#### 3.1. General Procedure for Tandem Annulation

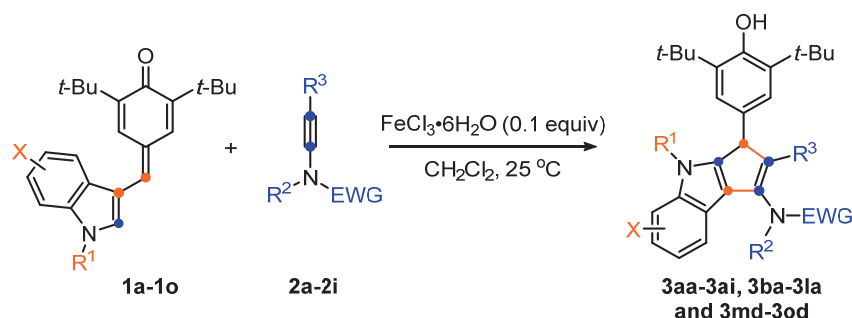

To a solution of indolyl-substituted *p*-quinone methides **1a-1o** (0.1 mmol) and ynamides **2a-2i** (0.11 mmol) in  $\text{CH}_2\text{Cl}_2$  (1.0 mL) was added  $\text{FeCl}_3 \cdot 6\text{H}_2\text{O}$  (0.01 mmol). The resulting mixture was stirred at  $25\text{ }^\circ\text{C}$  for the indicated time. The solvent was concentrated under reduced pressure, and then the resulting residue was purified by flash column chromatography on silica gel with the elution of petroleum ether/dichloromethane to give the corresponding products **3aa-3ai**, **3ba-3la** and **3md-3od**.

#### 3.2. Spectroscopic Data for Aminocyclopenta[*b*]indoles 3

##### *N*-(3-(3,5-Di-*tert*-butyl-4-hydroxyphenyl)-4-methyl-2-phenyl-3,4-dihydrocyclopenta[*b*]indol-1-yl)-*N*-(2-methoxyphenyl)-4-methylbenzenesulfonamide

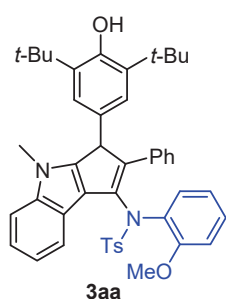

**3aa**: According to the above *General Procedure* by using **1a** (34.7 mg, 0.1 mmol), **2a** (41.5 mg, 0.11 mmol) and  $\text{FeCl}_3 \cdot 6\text{H}_2\text{O}$  (2.7 mg, 0.01 mmol) in  $\text{CH}_2\text{Cl}_2$  (1.0 mL) for 1.0 h at  $25\text{ }^\circ\text{C}$ , the chromatographic purification ( $V_{\text{petroleum ether}}/V_{\text{dichloromethane}} = 2/1$ ) afforded **3aa** (66.0 mg, 91% yield, light yellow powder).  **$^1\text{H}$  NMR** (600 MHz,  $\text{CDCl}_3$ )  $\delta = 7.92$  (br, 1H), 7.67 (d,  $J = 7.8$  Hz, 2H), 7.29 (d,  $J = 8.2$  Hz, 1H), 7.22–7.12 (m, 4H), 7.10 (t,  $J = 7.4$  Hz, 1H), 7.03 (t,  $J = 7.3$  Hz, 1H), 6.93 (t,  $J = 7.5$  Hz, 2H), 6.85–6.57 (m, 6H), 6.52 (t,  $J = 7.2$  Hz, 1H), 4.97

(s, 1H), 4.60 (s, 1H), 3.53 (s, 3H), 3.39 (s, 3H), 2.42 (s, 3H), 1.24 (s, 18H) ppm.  **$^{13}\text{C}$  NMR** (150 MHz,  $\text{CDCl}_3$ )  $\delta = 156.0, 152.6, 149.7, 142.7, 142.0, 140.8, 138.6, 135.8, 135.7, 135.1, 130.2$  (2C), 129.5, 128.8, 128.6, 128.1, 127.1, 126.4, 125.8, 124.7, 122.0, 121.7, 120.9, 120.4, 119.8, 119.5, 111.6, 109.1, 54.8, 51.5, 34.1, 30.7, 30.2, 21.5 ppm. **IR** (film):  $\bar{\nu} = 3361, 2921, 1598, 1462, 1433, 1349, 1265, 1161, 1090, 1029, 738, 588\text{ cm}^{-1}$ . **HRMS** (ESI):  $m/z$  calcd for  $\text{C}_{46}\text{H}_{49}\text{N}_2\text{O}_4\text{S}$  [ $M + \text{H}$ ] $^+$ : 725.3408; found: 725.3401.

***N*-(3-(3,5-Di-*tert*-butyl-4-hydroxyphenyl)-4-methyl-2-phenyl-3,4-dihydrocyclopenta[*b*]indol-1-yl)-4-methyl-*N*-phenylbenzenesulfonamide**

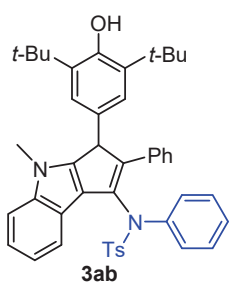

**3ab**: According to the above *General Procedure* by using **1a** (34.7 mg, 0.1 mmol), **2b** (38.2 mg, 0.11 mmol) and FeCl<sub>3</sub>·6H<sub>2</sub>O (2.7 mg, 0.01 mmol) in CH<sub>2</sub>Cl<sub>2</sub> (1.0 mL) for 1.0 h at 25 °C, the chromatographic purification (*V*<sub>petroleum ether</sub>/*V*<sub>dichloromethane</sub> = 2/1) afforded **3ab** (60.4 mg, 87% yield, 2:1 *dr*, light yellow powder). <sup>1</sup>H NMR (600 MHz, CDCl<sub>3</sub>, mixed isomers of **3ab** (2:1 *dr*)) δ = 7.80–7.45 (m, 4.96H, major + minor), 7.36 (br, 1.65H, major + minor), 7.30–7.17 (m, 5.67H, major + minor), 7.17–7.01 (m, 12.18H, major + minor),

6.96 (br, 3.32H, major + minor), 6.78 (br, 2.61H, major + minor), 6.59 (br, 0.52H, minor), 5.08 (br, 0.44H, minor), 5.00 (s, 1.00H, major), 4.95 (s, 1.08H, major), 4.74 (br, 0.42H, minor), 3.52 (s, 4.45H, major + minor), 2.35 (br, 1.46H, minor), 2.29 (s, 3.03H, major), 1.36 (br, 8.64H, minor), 1.24 (s, 18.00H, major) ppm. <sup>13</sup>C NMR (150 MHz, CDCl<sub>3</sub>) δ = 152.6 (major + minor), 151.0 (major + minor), 143.3 (2major), 143.2 (minor), 142.3 (major + minor), 140.7 (major + 2minor), 137.6 (major + minor), 136.0 (major + minor), 134.5 (major + minor), 134.1 (minor), 133.5 (major), 129.2 (2major + 3minor), 128.4 (2major), 127.7 (2major + 2minor), 126.3 (major + minor), 126.0 (2major), 125.8 (minor), 125.0 (minor), 124.8 (minor), 124.6 (minor), 124.5 (major), 122.0 (major), 120.9 (major + minor), 120.6 (major + minor), 120.1 (major), 119.7 (major + minor), 119.3 (minor), 118.5 (minor), 109.4 (major + minor), 51.0 (minor), 50.4 (major), 34.1 (major + minor), 30.6 (major + minor), 30.2 (major + minor), 21.4 (major + minor) ppm. IR (film):  $\bar{\nu}$  = 3630, 3382, 2956, 1597, 1483, 1433, 1357, 1233, 1163, 1090, 1033, 933, 735, 693, 586, 546 cm<sup>-1</sup>. HRMS (ESI): *m/z* calcd for C<sub>45</sub>H<sub>47</sub>N<sub>2</sub>O<sub>3</sub>S [*M* + H]<sup>+</sup>: 695.3302; found: 695.3295.

***N*-Benzyl-*N*-(3-(3,5-di-*tert*-butyl-4-hydroxyphenyl)-4-methyl-2-phenyl-3,4-dihydrocyclopenta[*b*]indol-1-yl) methanesulfonamide**

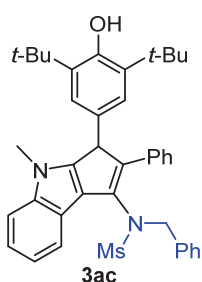

**3ac**: According to the above *General Procedure* by using **1a** (34.7 mg, 0.1 mmol), **2c** (31.4 mg, 0.11 mmol) and FeCl<sub>3</sub>·6H<sub>2</sub>O (2.7 mg, 0.01 mmol) in CH<sub>2</sub>Cl<sub>2</sub> (1.0 mL) for 0.5 h at 25 °C, the chromatographic purification (*V*<sub>petroleum ether</sub>/*V*<sub>dichloromethane</sub> = 2/1) afforded **3ac** (60.0 mg, 95% yield, 2:1 *dr*, light yellow solid, mp = 216–217 °C). <sup>1</sup>H NMR (600 MHz, CDCl<sub>3</sub>, mixed isomers of **3ac** (2:1 *dr*)) δ = 7.82–7.72 (m, 1.50H, major + minor), 7.40–7.31 (m, 3.07H, major + minor), 7.29–7.20 (m, 6.88H, major + minor), 7.17–6.94(m, 8.07H, major + minor), 6.93–6.59 (m, 5.13H, major + minor), 5.37 (s, 0.40H, minor), 5.35 (s, 0.48H, minor), 5.00 (br, 2.13H, major), 4.84 (br, 1.97H, major), 4.70 (br, 0.56H, minor), 4.64 (s, 0.51H, minor), 3.54 (s, 4.54H, major + minor), 2.99 (br, 1.50H, minor), 2.67 (s, 3.00H, major), 1.27 (s, 27.07H, major + minor) ppm. <sup>13</sup>C NMR (150 MHz, CDCl<sub>3</sub>) δ = 152.7 (major + minor), 151.5 (minor), 150.6 (major), 142.5 (major + minor), 140.8 (major + minor), 136.4 and 135.9 (2major + 2minor), 134.9 (minor), 134.6 (major), 133.0 (minor), 132.3 (major), 129.8 (major + minor), 129.2 (minor), 128.9 (major + minor), 128.6 (major), 128.1 (major), 127.7 (minor), 127.4 (major + minor), 126.5 (major + minor), 125.5 (major + minor), 124.7 (major + minor), 120.8 (major + minor), 120.5 (major + minor), 120.1 (major + minor), 119.5 (major + minor), 117.6 (major), 117.2 (minor), 109.9 (major + minor), 53.6 (major + minor), 51.3 (major + minor), 40.4 (major + minor), 34.1 (major + minor), 30.7 (major + minor), 30.2 (major + minor) ppm. IR

(film):  $\bar{\nu}$  = 3361, 2956, 2921, 1601, 1456, 1433, 1338, 1153, 1066, 1021, 732, 697, 578, 556  $\text{cm}^{-1}$ .  
**HRMS** (ESI):  $m/z$  calcd for  $\text{C}_{40}\text{H}_{45}\text{N}_2\text{O}_3\text{S}$  [ $M + \text{H}$ ] $^+$ : 633.3145; found: 633.3139.

### ***N*-(3-(3,5-Di-*tert*-butyl-4-hydroxyphenyl)-4-methyl-2-phenyl-3,4-dihydrocyclopenta[*b*]indol-1-yl)-*N*-methylmethanesulfonamide**

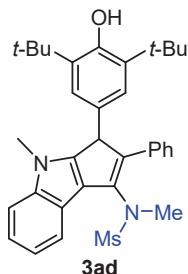

**3ad**: According to the above *General Procedure* by using **1a** (34.7 mg, 0.1 mmol), **2d** (23.0 mg, 0.11 mmol) and  $\text{FeCl}_3 \cdot 6\text{H}_2\text{O}$  (2.7 mg, 0.01 mmol) in  $\text{CH}_2\text{Cl}_2$  (1.0 mL) for 1.0 h at 25 °C, the chromatographic purification ( $V_{\text{petroleum ether}}/V_{\text{dichloromethane}} = 1/1$ ) afforded **3ad** (48.5 mg, 87% yield, light yellow powder).  **$^1\text{H}$  NMR** (400 MHz,  $\text{CDCl}_3$ )  $\delta$  = 7.83–7.72 (m, 1H), 7.36 (d,  $J = 7.5$  Hz, 2H), 7.33–7.27 (m, 1H), 7.27–7.17 (m, 4H), 7.13 (t,  $J = 7.3$  Hz, 1H), 6.88 (br, 2H), 5.03 (s, 1H), 4.85 (s, 1H), 3.54 (s, 3H), 3.50 (s, 3H), 2.75 (s, 3H), 1.30 (s, 18H) ppm.  **$^{13}\text{C}$  NMR** (100 MHz,  $\text{CDCl}_3$ )  $\delta$  = 152.7, 151.5, 140.8, 140.5, 136.2, 135.0, 134.9, 128.3, 128.1, 126.6, 125.7, 124.7, 120.8, 120.5, 120.2, 119.6, 117.5, 109.9, 50.6, 39.3, 37.1, 34.2, 30.7, 30.2 ppm. **IR** (film):  $\bar{\nu}$  = 3631, 3382, 2957, 1598, 1482, 1434, 1138, 1234, 1146, 1069, 1019, 963, 734, 695, 576  $\text{cm}^{-1}$ . **HRMS** (ESI):  $m/z$  calcd for  $\text{C}_{34}\text{H}_{41}\text{N}_2\text{O}_3\text{S}$  [ $M + \text{H}$ ] $^+$ : 557.2832; found: 557.2825.

### **2-(3-(3,5-Di-*tert*-butyl-4-hydroxyphenyl)-4-methyl-2-phenyl-3,4-dihydrocyclopenta[*b*]indol-1-yl)-2,3-dihydrobenzo[*d*]isothiazole 1,1-dioxide**

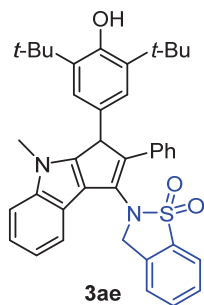

**3ae**: According to the above *General Procedure* by using **1a** (34.7 mg, 0.1 mmol), **2e** (29.6 mg, 0.11 mmol) and  $\text{FeCl}_3 \cdot 6\text{H}_2\text{O}$  (2.7 mg, 0.01 mmol) in  $\text{CH}_2\text{Cl}_2$  (1.0 mL) for 5.0 h at 25 °C, the chromatographic purification ( $V_{\text{petroleum ether}}/V_{\text{dichloromethane}} = 1.5/1$ ) afforded **3ae** (24.7 mg, 40% yield, light yellow powder).  **$^1\text{H}$  NMR** (600 MHz,  $\text{CDCl}_3$ )  $\delta$  = 7.93 (d,  $J = 7.7$  Hz, 1H), 7.64 (t,  $J = 7.4$  Hz, 1H), 7.59 (t,  $J = 8.6$  Hz, 3H), 7.51 (d,  $J = 8.0$  Hz, 1H), 7.36 (d,  $J = 7.6$  Hz, 1H), 7.28–7.25 (m, 1H), 7.18 (t,  $J = 7.5$  Hz, 2H), 7.14 (t,  $J = 7.7$  Hz, 1H), 7.10 (t,  $J = 7.3$  Hz, 1H), 7.03 (t,  $J = 7.7$  Hz, 1H), 6.98 (s, 2H), 5.02 (s, 1H), 4.91 (s, 1H), 4.80 (d,  $J = 14.4$  Hz, 1H), 4.75 (d,  $J = 14.4$  Hz, 1H), 3.56 (s, 3H), 1.32 (s, 18H) ppm.  **$^{13}\text{C}$  NMR** (150 MHz,  $\text{CDCl}_3$ )  $\delta$  = 152.7, 151.3, 142.7, 140.7, 136.1, 135.6, 134.4, 133.7, 132.7, 129.9, 129.2, 128.5, 128.0, 126.7, 125.6, 124.8, 124.5, 121.8, 120.9, 120.8, 120.2, 120.0, 118.1, 109.6, 51.4, 50.8, 34.3, 30.7, 30.3 ppm. **IR** (film):  $\bar{\nu}$  = 3631, 3389, 3054, 2958, 2872, 1598, 1518, 1481, 1433, 1311, 1173, 757, 738, 564  $\text{cm}^{-1}$ . **HRMS** (ESI):  $m/z$  calcd for  $\text{C}_{39}\text{H}_{41}\text{N}_2\text{O}_5\text{S}$  [ $M + \text{H}$ ] $^+$ : 617.2832; found: 617.2822.

### **3-(3-(3,5-Di-*tert*-butyl-4-hydroxyphenyl)-4-methyl-2-phenyl-3,4-dihydrocyclopenta[*b*]indol-1-yl) oxazolidin-2-one**

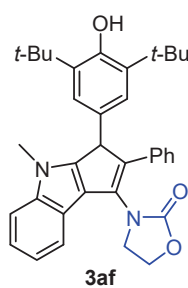

**3af**: According to the above *General Procedure* by using **1a** (34.7 mg, 0.1 mmol), **2f** (20.6 mg, 0.11 mmol) and  $\text{FeCl}_3 \cdot 6\text{H}_2\text{O}$  (2.7 mg, 0.01 mmol) in  $\text{CH}_2\text{Cl}_2$  (1.0 mL) for 2.0 h at 25 °C, the chromatographic purification ( $V_{\text{petroleum ether}}/V_{\text{dichloromethane}} = 1/1$ ) afforded **3af** (13.5 mg, 25% yield, yellow powder).  **$^1\text{H}$  NMR** (600 MHz,  $\text{CDCl}_3$ )  $\delta$  = 7.70–7.63 (m, 1H), 7.28–7.25 (m, 1H), 7.22 (d,  $J = 4.8$  Hz, 4H), 7.19–7.11 (m, 3H), 6.90 (s, 2H), 5.04 (s, 1H), 4.77 (s, 1H), 4.47–4.40 (m, 2H), 3.79–3.73 (m, 1H), 3.70–3.64 (m, 1H), 3.54 (s, 3H), 1.31 (s, 18H) ppm.  **$^{13}\text{C}$  NMR** (150 MHz,  $\text{CDCl}_3$ )  $\delta$

= 156.7, 152.7, 150.9, 140.7, 136.0, 135.3, 134.3, 132.3, 128.3, 128.1, 126.5, 125.7, 124.9, 120.9, 120.8, 120.2, 120.0, 117.6, 109.5, 62.8, 50.8, 45.8, 34.2, 30.7, 30.2 ppm. **IR** (film):  $\bar{\nu}$  = 3630, 3399, 3054, 2957, 1758, 1596, 1483, 1432, 1398, 1231, 1094, 1039, 737, 701  $\text{cm}^{-1}$ . **HRMS** (ESI):  $m/z$  calcd for  $\text{C}_{35}\text{H}_{39}\text{N}_2\text{O}_3$  [ $M + \text{H}$ ] $^+$ : 535.2955; found: 535.2948.

### ***N*-(3-(3,5-Di-*tert*-butyl-4-hydroxyphenyl)-4-methyl-2-(thiophen-2-yl)-3,4-dihydrocyclopenta[*b*]indol-1-yl)-*N*-methylmethanesulfonamide**

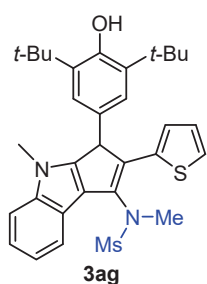

**3ag**: According to the above *General Procedure* by using **1a** (34.7 mg, 0.1 mmol), **2g** (23.7 mg, 0.11 mmol) and  $\text{FeCl}_3 \cdot 6\text{H}_2\text{O}$  (2.7 mg, 0.01 mmol) in  $\text{CH}_2\text{Cl}_2$  (1.0 mL) for 0.5 h at 25 °C, the chromatographic purification ( $V_{\text{petroleum ether}}/V_{\text{dichloromethane}} = 1/1$ ) afforded **3ag** (36.7 mg, 65% yield, light green powder).  **$^1\text{H}$  NMR** (600 MHz,  $\text{CDCl}_3$ )  $\delta$  = 7.77 (br, 1H), 7.31–7.27 (m, 1H), 7.23–7.17 (m, 2H), 7.17–6.90 (m, 3H), 6.85 (br, 2H), 5.11 (s, 1H), 4.77 (br, 1H), 3.52 (s, 3H), 3.47 (s, 3H), 3.10 (s, 3H), 1.35 (s, 18H) ppm.  **$^{13}\text{C}$  NMR** (150 MHz,  $\text{CDCl}_3$ )  $\delta$  = 153.0, 151.8, 140.8,

137.0, 136.5, 135.2, 133.8, 126.4 (2C), 124.8, 124.6, 124.3, 120.9, 120.4 (2C), 119.7, 116.7, 109.9, 50.6, 38.9, 36.1, 34.3, 30.6, 30.3 ppm. **IR** (film):  $\bar{\nu}$  = 3379, 2956, 1598, 1481, 1460, 1433, 1338, 1145, 1120, 1068, 1021, 734, 695  $\text{cm}^{-1}$ . **HRMS** (ESI):  $m/z$  calcd for  $\text{C}_{32}\text{H}_{39}\text{N}_2\text{O}_3\text{S}_2$  [ $M + \text{H}$ ] $^+$ : 563.2397; found: 563.2383.

### ***N*-(2-Cyclopropyl-3-(3,5-di-*tert*-butyl-4-hydroxyphenyl)-4-methyl-3,4-dihydrocyclopenta[*b*]indol-1-yl)-*N*-methylmethanesulfonamide**

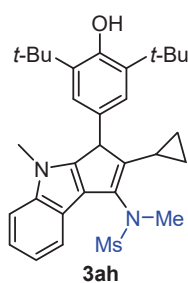

**3ah**: According to the above *General Procedure* by using **1a** (34.7 mg, 0.1 mmol), **2h** (19.0 mg, 0.11 mmol) and  $\text{FeCl}_3 \cdot 6\text{H}_2\text{O}$  (2.7 mg, 0.01 mmol) in  $\text{CH}_2\text{Cl}_2$  (1.0 mL) for 0.5 h at 25 °C, the chromatographic purification ( $V_{\text{petroleum ether}}/V_{\text{dichloromethane}} = 2/1$ ) afforded **3ah** (42.7 mg, 82% yield, brown foam).  **$^1\text{H}$  NMR** (600 MHz,  $\text{CDCl}_3$ )  $\delta$  = 7.60 (br, 1H), 7.29–7.22 (m, 1H), 7.18–7.08 (m, 2H), 6.92 (br, 2H), 5.12 (s, 1H), 4.22 (br, 1H), 3.46 (br, 3H), 3.42 (s, 3H), 3.04 (s, 3H), 1.89 (br, 1H), 1.37 (s, 18H), 0.83–0.73 (m, 1H), 0.70–0.34 (m, 2H), 0.31–0.21 (m, 1H) ppm.  **$^{13}\text{C}$  NMR** (150

MHz,  $\text{CDCl}_3$ )  $\delta$  = 152.7, 150.4, 144.1, 140.3, 136.3, 134.1, 125.8, 124.5, 120.1, 119.7 (2C), 118.9, 116.1, 109.8, 49.5, 37.8, 36.9, 34.2, 30.5, 30.2, 10.4, 7.3, 5.8 ppm. **IR** (film):  $\bar{\nu}$  = 3630, 3430, 2957, 1611, 1468, 1433, 1341, 1235, 1147, 1068, 961, 737, 519  $\text{cm}^{-1}$ . **HRMS** (ESI):  $m/z$  calcd for  $\text{C}_{31}\text{H}_{41}\text{N}_2\text{O}_3\text{S}$  [ $M + \text{H}$ ] $^+$ : 521.2832; found: 521.2829.

### ***N*-(2-Cyclohexyl-3-(3,5-di-*tert*-butyl-4-hydroxyphenyl)-4-methyl-3,4-dihydrocyclopenta[*b*]indol-1-yl)-*N*-methylmethanesulfonamide**

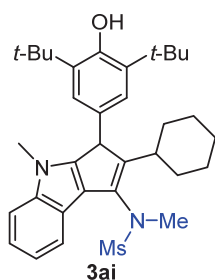

**3ai**: According to the above *General Procedure* by using **1a** (34.7 mg, 0.1 mmol), **2i** (23.7 mg, 0.11 mmol) and  $\text{FeCl}_3 \cdot 6\text{H}_2\text{O}$  (2.7 mg, 0.01 mmol) in  $\text{CH}_2\text{Cl}_2$  (1.0 mL) for 1.0 h at 25 °C, the chromatographic purification ( $V_{\text{petroleum ether}}/V_{\text{dichloromethane}} = 2/1$ ) afforded **3ai** (32.1 mg, 57% yield, 1:1 *dr*, yellow powder).  **$^1\text{H}$  NMR** (600 MHz,  $\text{CDCl}_3$ , mixed isomers of **3ai** (1:1 *dr*))  $\delta$  = 7.69–7.52 (m, 1.88H, major + minor), 7.31–7.24 (m, 1.88H, major + minor), 7.20–7.12 (m, 3.75H, major + minor), 7.09–6.45 (m, 3.62H, major + minor), 5.12 (s, 0.86H, minor), 5.10 (s,

1.00H, major), 4.46 (s, 0.86H, minor), 4.41 (s, 1.02H, major), 3.48 (s, 3.05H, major), 3.43 (s, 5.15H, minor), 3.38 (s, 3.01H, major), 3.05 (s, 3.00H, major), 3.02 (s, 2.57H, minor), 2.90–2.80 (m, 1.88H, major + minor), 1.92–1.83 (m, 0.87H, minor), 1.76–1.70 (m, 2.88H, major + minor), 1.62–1.56 (m, 2.06H, major), 1.55–1.45 (m, 5.15H, major + minor), 1.37 (s, 33.51H, major + minor), 1.29–1.24 (m, 2.08H, major), 1.20–1.12 (m, 1.86H, major + minor), 1.02–0.84 (m, 1.97H, major + minor), 0.58–0.42 (m, 1.87H, major + minor) ppm. **<sup>13</sup>C NMR** (150 MHz, CDCl<sub>3</sub>)  $\delta$  = 152.8 (major + minor), 151.5 (major), 151.0 (minor), 149.7 (minor), 149.4 (major), 140.4 (minor), 140.3 (major), 136.2 (major + minor), 131.9 (major + minor), 126.4 (minor), 126.0 (major), 124.8 (major + minor), 120.1 (major + minor), 119.9 (minor), 119.8 (2C, major), 119.6 (minor), 119.0 (minor), 118.8 (major), 116.1 (minor), 115.5 (major), 109.9 (major + minor), 48.8 (minor), 48.6 (major), 38.6 (major), 38.2 (minor), 38.1 (minor), 37.9 (minor), 37.8 (major), 37.4 (major), 34.7 (major), 34.2 (major + minor), 32.8 (minor), 32.3 (minor), 31.2 (major), 30.5 (major + minor), 30.3 (major + minor), 27.1 (minor), 27.0 (major), 26.9 (major + minor), 26.25 (major), 26.15 (minor) ppm. **IR** (film):  $\bar{\nu}$  = 3417, 2957, 1610, 1482, 1433, 1338, 1225, 1146, 1054, 962, 739, 696 cm<sup>-1</sup>. **HRMS** (ESI): *m/z* calcd for C<sub>34</sub>H<sub>46</sub>N<sub>2</sub>O<sub>3</sub>SNa [M + Na]<sup>+</sup>: 585.3121; found: 585.3115.

***N*-(3-(3,5-Di-*tert*-butyl-4-hydroxyphenyl)-7-methoxy-4-methyl-2-phenyl-3,4-dihydrocyclopenta[*b*]indol-1-yl)-*N*-(2-methoxyphenyl)-4-methylbenzenesulfonamide**

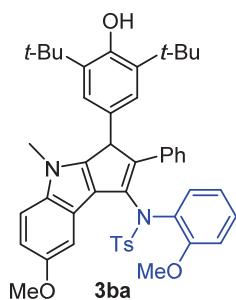

**3ba:** According to the above *General Procedure* by using **1b** (37.7 mg, 0.1 mmol), **2a** (41.5 mg, 0.11 mmol) and FeCl<sub>3</sub>·6H<sub>2</sub>O (2.7 mg, 0.01 mmol) in CH<sub>2</sub>Cl<sub>2</sub> (1.0 mL) for 0.3 h at 25 °C, the chromatographic purification (*V*<sub>petroleum ether</sub>/*V*<sub>dichloromethane</sub> = 1/1) afforded **3ba** (50.0 mg, 66% yield, light yellow powder).

**<sup>1</sup>H NMR** (600 MHz, CDCl<sub>3</sub>)  $\delta$  = 7.68 (d, *J* = 7.1 Hz, 2H), 7.62 (br, 1H), 7.22–7.12 (m, 3H), 7.10 (t, *J* = 7.6 Hz, 1H), 7.02 (t, *J* = 7.0 Hz, 1H), 6.91 (t, *J* = 7.4 Hz, 2H), 6.86 (d, *J* = 8.6 Hz, 1H), 6.81–6.58 (m, 6H), 6.56–6.48 (m, 1H), 4.97 (s, 1H), 4.59 (br, 1H), 3.89 (s, 3H), 3.50 (s, 3H), 3.41 (s, 3H), 2.40 (s, 3H), 1.24 (s, 18H) ppm. **<sup>13</sup>C NMR** (150 MHz, CDCl<sub>3</sub>)  $\delta$  = 156.0, 154.1, 152.5, 150.2, 142.8, 141.2, 138.4, 136.2, 135.8, 135.7, 135.1, 130.2, 129.8, 129.5, 128.8, 128.5, 128.0, 127.0, 126.3, 126.0, 124.7, 122.0, 120.7, 119.8, 111.6, 110.4, 109.6, 104.2, 56.0, 54.8, 51.5, 34.1, 30.7, 30.2, 21.5 ppm. **IR** (film):  $\bar{\nu}$  = 3632, 3377, 2955, 1597, 1497, 1462, 1434, 1347, 1265, 1160, 1091, 1028, 735, 699, 586 cm<sup>-1</sup>. **HRMS** (ESI): *m/z* calcd for C<sub>47</sub>H<sub>51</sub>N<sub>2</sub>O<sub>5</sub>S [*M* + H]<sup>+</sup>: 755.3513; found: 755.3505.

***N*-(3-(3,5-Di-*tert*-butyl-4-hydroxyphenyl)-4,7-dimethyl-2-phenyl-3,4-dihydrocyclopenta[*b*]indol-1-yl)-*N*-(2-methoxyphenyl)-4-methylbenzenesulfonamide**

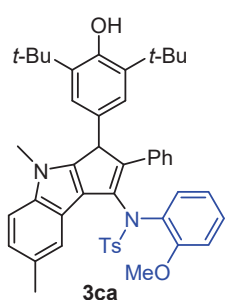

**3ca:** According to the above *General Procedure* by using **1c** (36.1 mg, 0.1 mmol), **2a** (41.5 mg, 0.11 mmol) and FeCl<sub>3</sub>·6H<sub>2</sub>O (2.7 mg, 0.01 mmol) in CH<sub>2</sub>Cl<sub>2</sub> (1.0 mL) for 0.3 h at 25 °C, the chromatographic purification (*V*<sub>petroleum ether</sub>/*V*<sub>dichloromethane</sub> = 1/1) afforded **3ca** (51.8 mg, 70% yield, light yellow solid, mp = 209–210 °C). **<sup>1</sup>H NMR** (600 MHz, CDCl<sub>3</sub>)  $\delta$  = 7.66 (d, *J* = 7.9 Hz, 2H), 7.43 (br, 1H), 7.15 (d, *J* = 8.3 Hz, 3H), 7.10 (t, *J* = 7.0 Hz, 1H), 7.06 (t, *J* = 7.4 Hz, 1H), 7.02–6.96 (m, 3H), 6.88–6.62 (m, 6H), 6.55 (t, *J* = 7.2 Hz, 1H), 4.96 (s, 1H), 4.58 (br, 1H), 3.49 (s, 3H), 3.37 (s, 3H), 2.42 (s, 3H), 2.41 (s, 3H), 1.24 (s, 18H) ppm. **<sup>13</sup>C NMR** (150 MHz, CDCl<sub>3</sub>)  $\delta$  = 155.9, 152.5, 150.1, 142.6, 142.1, 139.2, 138.7, 135.8, 135.5, 135.2, 130.3, 130.1, 129.6, 128.8, 128.5, 128.3, 128.1, 127.2, 126.4, 125.9, 124.7, 121.8, 121.7, 121.6, 120.0, 119.9, 111.5, 108.7, 54.6, 51.4, 34.1, 30.6, 30.2, 21.6, 21.5 ppm. **IR** (film):  $\bar{\nu}$  = 3362, 2920, 1598, 1462, 1433, 1349, 1161, 1088, 1042, 736, 579, 558 cm<sup>-1</sup>. **HRMS** (ESI): *m/z* calcd for C<sub>47</sub>H<sub>51</sub>N<sub>2</sub>O<sub>4</sub>S [*M* + H]<sup>+</sup>: 739.3564; found: 739.3555.

***N*-(3-(3,5-Di-*tert*-butyl-4-hydroxyphenyl)-4,6-dimethyl-2-phenyl-3,4-dihydrocyclopenta[*b*]indol-1-yl)-*N*-(2-methoxyphenyl)-4-methylbenzenesulfonamide**

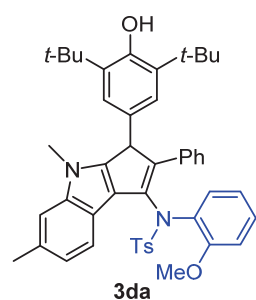

**3da:** According to the above *General Procedure* by using **1d** (36.1 mg, 0.1 mmol), **2a** (41.5 mg, 0.11 mmol) and FeCl<sub>3</sub>·6H<sub>2</sub>O (2.7 mg, 0.01 mmol) in CH<sub>2</sub>Cl<sub>2</sub> (1.0 mL) for 0.3 h at 25 °C, the chromatographic purification (*V*<sub>petroleum ether</sub>/*V*<sub>dichloromethane</sub> = 1/1) afforded **3da** (53.9 mg, 73% yield, light yellow solid, mp = 198–199 °C). **<sup>1</sup>H NMR** (600 MHz, CDCl<sub>3</sub>)  $\delta$  = 7.78 (br, 1H), 7.66 (d, *J* = 7.9 Hz, 2H), 7.15 (d, *J* = 6.9 Hz, 2H), 7.10 (t, *J* = 7.5 Hz, 1H), 7.07 (s, 1H), 7.02 (t, *J* = 7.03 Hz, 1H), 6.97 (d, *J* = 7.9 Hz, 1H), 6.92 (t, *J* = 7.6 Hz, 2H), 6.82–6.61 (m, 6H), 6.53 (t, *J* = 7.4 Hz, 1H), 4.96 (s, 1H), 4.58 (br, 1H), 3.49 (s, 3H), 3.40 (s, 3H),

2.51 (s, 3H), 2.41 (s, 3H), 1.24 (s, 18H) ppm.  $^{13}\text{C}$  NMR (150 MHz,  $\text{CDCl}_3$ )  $\delta$  = 156.0, 152.5, 149.3, 142.6, 141.9, 141.2, 138.6, 135.8, 135.7, 135.2, 130.1 (3C), 129.5, 128.8, 128.5, 128.1, 127.1, 126.3, 126.0, 124.7, 121.6, 121.1, 120.7, 119.9, 119.6, 111.5, 109.3, 54.8, 51.5, 34.1, 30.6, 30.2, 21.9, 21.5 ppm. IR (film):  $\bar{\nu}$  = 3360, 2920, 1597, 1433, 1348, 1160, 1088, 1042, 817, 699, 586, 557  $\text{cm}^{-1}$ . HRMS (ESI):  $m/z$  calcd for  $\text{C}_{47}\text{H}_{51}\text{N}_2\text{O}_4\text{S}$  [ $M + \text{H}$ ] $^+$ : 739.3564; found: 739.3558.

***N*-(3-(3,5-Di-*tert*-butyl-4-hydroxyphenyl)-4,5-dimethyl-2-phenyl-3,4-dihydrocyclopenta[*b*]indol-1-yl)-*N*-(2-methoxyphenyl)-4-methylbenzenesulfonamide**

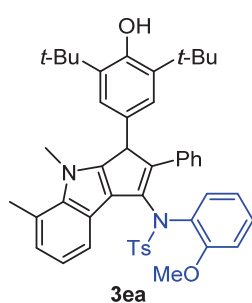

**3ea**: According to the above *General Procedure* by using **1e** (36.1 mg, 0.1 mmol), **2a** (41.5 mg, 0.11 mmol) and  $\text{FeCl}_3 \cdot 6\text{H}_2\text{O}$  (2.7 mg, 0.01 mmol) in  $\text{CH}_2\text{Cl}_2$  (1.0 mL) for 0.3 h at 25 °C, the chromatographic purification ( $V_{\text{petroleum ether}}/V_{\text{dichloromethane}} = 1/1$ ) afforded **3ea** (60.0 mg, 81% yield, light yellow solid, mp = 199–200 °C).  $^1\text{H}$  NMR (600 MHz,  $\text{CDCl}_3$ )  $\delta$  = 7.79 (br, 1H), 7.65 (d,  $J$  = 6.3 Hz, 2H), 7.21–7.06 (m, 3H), 7.05–6.97 (m, 2H), 6.94–6.89 (m, 3H), 6.85–6.35 (m, 7H), 4.96 (s, 1H), 4.56 (br, 1H), 3.81 (s, 3H), 3.40 (s, 3H), 2.74

(s, 3H), 2.40 (s, 3H), 1.24 (s, 18H) ppm.  $^{13}\text{C}$  NMR (150 MHz,  $\text{CDCl}_3$ )  $\delta$  = 156.3–155.3 (1C), 152.5, 150.4, 142.6, 142.3, 139.4, 138.6, 135.8, 135.7–135.2 (1C), 135.1, 130.1, 129.5 (2C), 128.7, 128.4, 128.0, 127.0, 126.3, 126.0, 124.7, 123.6, 122.5, 121.1, 120.9, 120.2, 119.9, 119.6, 111.5, 54.7, 51.7, 34.5, 34.1, 30.2, 21.5, 19.9 ppm. IR (film):  $\bar{\nu}$  = 3634, 3361, 2956, 2921, 1597, 1497, 1433, 1348, 1265, 1161, 1089, 1028, 746, 589, 557  $\text{cm}^{-1}$ . HRMS (ESI):  $m/z$  calcd for  $\text{C}_{47}\text{H}_{51}\text{N}_2\text{O}_4\text{S}$  [ $M + \text{H}$ ] $^+$ : 739.3564; found: 739.3557.

***N*-(3-(3,5-Di-*tert*-butyl-4-hydroxyphenyl)-7-fluoro-4-methyl-2-phenyl-3,4-dihydrocyclopenta[*b*]indol-1-yl)-*N*-(2-methoxyphenyl)-4-methylbenzenesulfonamide**

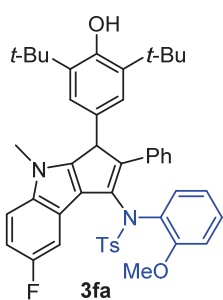

**3fa**: According to the above *General Procedure* by using **1f** (36.5 mg, 0.1 mmol), **2a** (41.5 mg, 0.11 mmol) and  $\text{FeCl}_3 \cdot 6\text{H}_2\text{O}$  (2.7 mg, 0.01 mmol) in  $\text{CH}_2\text{Cl}_2$  (1.0 mL) for 0.2 h at 25 °C, the chromatographic purification ( $V_{\text{petroleum ether}}/V_{\text{dichloromethane}} = 1/1$ ) afforded **3fa** (72.9 mg, 98% yield, light yellow solid, mp = 199–200 °C).  $^1\text{H}$  NMR (600 MHz,  $\text{CDCl}_3$ )  $\delta$  = 7.66 (d,  $J$  = 8.1 Hz, 2H), 7.24 (s, 1H), 7.20 (d,  $J$  = 7.8 Hz, 2H), 7.15 (dd,  $J$  = 8.9, 4.5 Hz, 1H), 7.12–7.01 (m, 2H), 6.98 (t,  $J$  = 7.4 Hz, 2H), 6.92–6.88 (m, 1H), 6.84–6.59 (m, 5H), 6.57–6.45

(m, 2H), 4.98 (s, 1H), 4.56 (s, 1H), 3.50 (s, 3H), 3.40 (s, 3H), 2.44 (s, 3H), 1.25 (s, 18H) ppm.  $^{13}\text{C}$  NMR (150 MHz,  $\text{CDCl}_3$ )  $\delta$  = 157.9 (d,  $^1J_{\text{C-F}} = 231.0$  Hz), 156.2, 152.6, 151.3, 143.1, 142.3, 138.5, 137.3, 135.9, 135.1 (2C), 130.7, 129.6 (2C), 129.0, 128.8, 128.1, 127.3, 126.6, 125.5, 124.7, 121.7 (d,  $^3J_{\text{C-F}} = 11.1$  Hz), 120.6, 119.7, 111.5, 109.4 (d,  $^3J_{\text{C-F}} = 9.9$  Hz), 108.4 (d,  $^2J_{\text{C-F}} = 25.1$  Hz), 107.0 (d,  $^2J_{\text{C-F}} = 24.6$  Hz), 54.8, 51.7, 34.1, 30.8, 30.2, 21.5 ppm. IR (film):  $\bar{\nu}$  = 3632, 3366, 2956, 1597, 1497, 1463, 1351, 1161, 1090, 1027, 736, 585, 558  $\text{cm}^{-1}$ . HRMS (ESI):  $m/z$  calcd for  $\text{C}_{46}\text{H}_{48}\text{FN}_2\text{O}_4\text{S}$  [ $M + \text{H}$ ] $^+$ : 743.3313; found: 743.3307.

***N*-(7-Chloro-3-(3,5-di-*tert*-butyl-4-hydroxyphenyl)-4-methyl-2-phenyl-3,4-dihydrocyclopenta[*b*]indol-1-yl)-*N*-(2-methoxyphenyl)-4-methylbenzenesulfonamide**

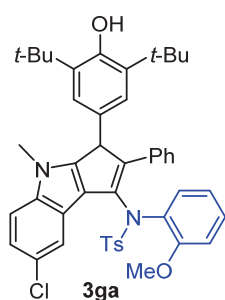

**3ga**: According to the above *General Procedure* by using **1g** (38.1 mg, 0.1 mmol), **2a** (41.5 mg, 0.11 mmol) and FeCl<sub>3</sub>·6H<sub>2</sub>O (2.7 mg, 0.01 mmol) in CH<sub>2</sub>Cl<sub>2</sub> (1.0 mL) for 0.2 h at 25 °C, the chromatographic purification (*V*<sub>petroleum ether</sub>/*V*<sub>dichloromethane</sub> = 1/1) afforded **3ga** (72.2 mg, 95% yield, light yellow powder).

**<sup>1</sup>H NMR** (600 MHz, CDCl<sub>3</sub>) δ = 7.63 (d, *J* = 8.0 Hz, 2H), 7.25 (br, 1H), 7.22 (d, *J* = 7.9 Hz, 2H), 7.17–7.03 (m, 6H), 6.88 (br, 2H), 6.79–6.61 (m, 3H), 6.50 (d, *J* = 4.5 Hz, 2H), 4.99 (s, 1H), 4.57 (s, 1H), 3.50 (s, 3H), 3.39 (s, 3H), 2.46 (s, 3H),

1.26 (s, 18H) ppm. **<sup>13</sup>C NMR** (150 MHz, CDCl<sub>3</sub>) δ = 156.2, 152.7, 151.2, 143.3 (2C), 139.0, 138.5, 136.0, 135.1, 134.8, 131.4, 129.7, 129.3, 129.1, 129.0, 128.0, 127.4, 126.8, 125.3, 125.1, 124.7, 122.2, 121.3, 120.4, 120.0, 119.8, 111.4, 110.0, 54.7, 51.6, 34.2, 30.8, 30.2, 21.7 ppm. **IR** (film):  $\bar{\nu}$  = 3363, 2921, 1597, 1496, 1433, 1351, 1161, 1088, 1022, 592, 579, 557 cm<sup>-1</sup>. **HRMS** (ESI): *m/z* calcd for C<sub>46</sub>H<sub>48</sub>ClN<sub>2</sub>O<sub>4</sub>S [*M* + H]<sup>+</sup>: 759.3018; found: 759.3016.

***N*-(7-Bromo-3-(3,5-di-*tert*-butyl-4-hydroxyphenyl)-4-methyl-2-phenyl-3,4-dihydrocyclopenta[*b*]indol-1-yl)-*N*-(2-methoxyphenyl)-4-methylbenzenesulfonamide**

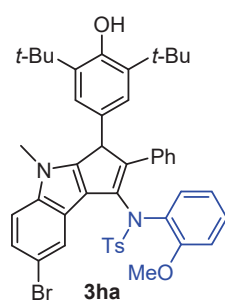

**3ha**: According to the above *General Procedure* by using **1h** (42.5 mg, 0.1 mmol), **2a** (41.5 mg, 0.11 mmol) and FeCl<sub>3</sub>·6H<sub>2</sub>O (2.7 mg, 0.01 mmol) in CH<sub>2</sub>Cl<sub>2</sub> (1.0 mL) for 0.3 h at 25 °C, the chromatographic purification (*V*<sub>petroleum ether</sub>/*V*<sub>dichloromethane</sub> = 1/1) afforded **3ha** (77.8 mg, 97% yield, light yellow powder).

**<sup>1</sup>H NMR** (600 MHz, CDCl<sub>3</sub>) δ = 7.63 (d, *J* = 8.2 Hz, 2H), 7.45 (br, 1H), 7.25–7.19 (m, 3H), 7.16–7.04 (m, 5H), 6.90 (br, 2H), 6.81–6.61 (m, 3H), 6.56–6.44 (m, 2H), 4.99 (s, 1H), 4.56 (s, 1H), 3.49 (s, 3H), 3.39 (s, 3H), 2.47 (s, 3H), 1.26 (s, 18H)

ppm. **<sup>13</sup>C NMR** (150 MHz, CDCl<sub>3</sub>) δ = 156.2, 152.7, 151.1, 143.4, 143.2, 139.3, 138.4, 136.0, 135.1, 134.7, 131.5, 129.7 (2C), 129.2, 129.0, 127.9, 127.5, 126.9, 125.3, 124.7, 124.3, 123.0, 122.7, 119.8 (2C), 112.8, 111.4, 110.5, 54.7, 51.6, 34.2, 30.7, 30.2, 21.8 ppm. **IR** (film):  $\bar{\nu}$  = 3631, 3411, 2956, 1598, 1496, 1464, 1434, 1349, 1264, 1162, 1057, 1026, 788, 730, 663, 591, 555 cm<sup>-1</sup>. **HRMS** (ESI): *m/z* calcd for C<sub>46</sub>H<sub>48</sub>BrN<sub>2</sub>O<sub>4</sub>S [*M* + H]<sup>+</sup>: 803.2513; found: 803.2507.

***N*-(6-Bromo-3-(3,5-di-*tert*-butyl-4-hydroxyphenyl)-4-methyl-2-phenyl-3,4-dihydrocyclopenta[*b*]indol-1-yl)-*N*-(2-methoxyphenyl)-4-methylbenzenesulfonamide**

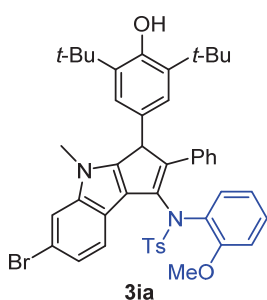

**3ia**: According to the above *General Procedure* by using **1i** (42.5 mg, 0.1 mmol), **2a** (41.5 mg, 0.11 mmol) and FeCl<sub>3</sub>·6H<sub>2</sub>O (2.7 mg, 0.01 mmol) in CH<sub>2</sub>Cl<sub>2</sub> (1.0 mL) for 0.5 h at 25 °C, the chromatographic purification (*V*<sub>petroleum ether</sub>/*V*<sub>dichloromethane</sub> = 1/1) afforded **3ia** (74.6 mg, 93% yield, light yellow solid, mp = 205–206 °C).

**<sup>1</sup>H NMR** (600 MHz, CDCl<sub>3</sub>) δ = 7.81 (br, 1H), 7.66 (d, *J* = 8.0 Hz, 2H), 7.43 (d, *J* = 1.3 Hz, 1H), 7.25–7.22 (m, 1H), 7.19 (d, *J* = 7.5 Hz, 2H), 7.12–7.08 (m, 1H), 7.05 (t, *J* = 7.4 Hz, 1H), 6.91 (t, *J* = 7.6 Hz, 2H),

6.75 (d, *J* = 8.2 Hz, 1H), 6.66 (br, 2H), 6.58 (br, 2H), 6.52–6.41 (m, 2H), 4.99 (s, 1H), 4.57 (s, 1H), 3.49 (s, 3H), 3.40 (s, 3H), 2.43 (s, 3H), 1.24 (s, 18H) ppm. **<sup>13</sup>C NMR** (150 MHz, CDCl<sub>3</sub>) δ = 156.2, 152.7, 150.1, 142.9, 142.5, 141.5, 138.4, 135.9, 135.1, 134.9, 130.1, 129.9, 129.5, 129.0, 128.8, 128.1,



127.2, 126.6, 125.3, 124.6, 123.3, 122.6, 121.2, 120.6, 119.7, 113.9, 112.3, 111.6, 54.9, 51.7, 34.1, 30.8, 30.2, 21.5 ppm. **IR** (film):  $\bar{\nu}$  = 3404, 2957, 1597, 1497, 1468, 1434, 1348, 1264, 1162, 1091, 1029, 857, 748, 587, 556  $\text{cm}^{-1}$ . **HRMS** (ESI):  $m/z$  calcd for  $\text{C}_{46}\text{H}_{48}\text{BrN}_2\text{O}_4\text{S}$  [ $M + \text{H}$ ] $^+$ : 803.2513; found: 803.2507.

***N*-(5-Bromo-3-(3,5-di-*tert*-butyl-4-hydroxyphenyl)-4-methyl-2-phenyl-3,4-dihydrocyclopenta[*b*]indol-1-yl)-*N*-(2-methoxyphenyl)-4-methylbenzenesulfonamide**

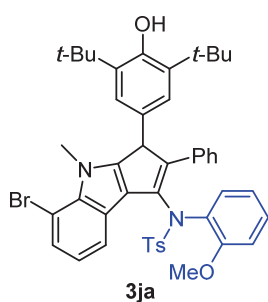

**3ja**: According to the above *General Procedure* by using **1j** (42.5 mg, 0.1 mmol), **2a** (41.5 mg, 0.11 mmol) and  $\text{FeCl}_3 \cdot 6\text{H}_2\text{O}$  (2.7 mg, 0.01 mmol) in  $\text{CH}_2\text{Cl}_2$  (1.0 mL) for 0.3 h at 25 °C, the chromatographic purification ( $V_{\text{petroleum ether}}/V_{\text{dichloromethane}} = 1/1$ ) afforded **3ja** (78.6 mg, 98% yield, light yellow powder).  **$^1\text{H}$  NMR** (600 MHz,  $\text{CDCl}_3$ )  $\delta$  = 7.99 (br, 1H), 7.66 (d,  $J = 7.0$  Hz, 2H), 7.31 (d,  $J = 7.6$  Hz, 1H), 7.16 (br, 2H), 7.11–7.08 (m, 1H), 7.03 (t,  $J = 7.4$  Hz, 1H), 7.00–6.94 (m, 1H), 6.89 (t,  $J = 7.5$  Hz, 2H), 6.83–6.40 (m, 7H),

4.99 (s, 1H), 4.56 (s, 1H), 3.92 (s, 3H), 3.39 (s, 3H), 2.41 (s, 3H), 1.24 (s, 18H) ppm.  **$^{13}\text{C}$  NMR** (150 MHz,  $\text{CDCl}_3$ )  $\delta$  = 156.0, 152.7, 151.2, 142.9 (2C), 138.4, 136.6, 135.9, 134.8 (2C), 129.9 (2C), 129.5, 128.9, 128.7, 128.0, 127.1, 126.6, 125.8, 125.3, 124.8, 124.6, 121.5, 121.2, 120.5, 119.7, 111.6, 103.6, 54.8, 52.0, 34.7, 34.1, 30.2, 21.5 ppm. **IR** (film):  $\bar{\nu}$  = 3633, 3378, 2956, 1598, 1497, 1435, 1350, 1265, 1162, 1104, 1028, 733, 662, 589, 549  $\text{cm}^{-1}$ . **HRMS** (ESI):  $m/z$  calcd for  $\text{C}_{46}\text{H}_{48}\text{BrN}_2\text{O}_4\text{S}$  [ $M + \text{H}$ ] $^+$ : 803.2513; found: 803.2503.

***N*-(3-(3,5-Di-*tert*-butyl-4-hydroxyphenyl)-4,8-dimethyl-2-phenyl-3,4-dihydrocyclopenta[*b*]indol-1-yl)-*N*-(2-methoxyphenyl)-4-methylbenzenesulfonamide**

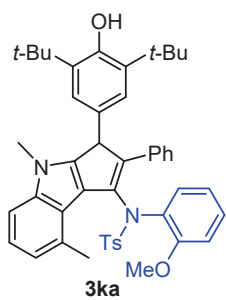

**3ka**: According to the above *General Procedure* by using **1k** (36.1 mg, 0.1 mmol), **2a** (41.5 mg, 0.11 mmol) and  $\text{FeCl}_3 \cdot 6\text{H}_2\text{O}$  (2.7 mg, 0.01 mmol) in  $\text{CH}_2\text{Cl}_2$  (1.0 mL) for 1.0 h at 25 °C, the chromatographic purification ( $V_{\text{petroleum ether}}/V_{\text{dichloromethane}} = 1.5/1$ ) afforded **3ka** (65.1 mg, 88% yield, 4:1 *dr*, light yellow powder).  **$^1\text{H}$  NMR** (600 MHz,  $\text{CDCl}_3$ , mixed isomers of **3ka** (4:1 *dr*))  $\delta$  = 7.71 (d,  $J = 7.9$  Hz, 0.97H, major), 7.76 (d,  $J = 8.1$  Hz, 0.52H, minor), 7.57 (d,  $J = 8.1$  Hz, 1.97H, major), 7.22–7.12 (m, 3.78H, major + minor), 7.08–7.02 (m, 1.53H,

major + minor), 6.97–6.92 (m, 1.54H, major + minor), 6.89–6.86 (m, 2.41H, major + minor), 6.85–6.74 (m, 4.57H, major + minor), 6.69 (d,  $J = 7.3$  Hz, 2.01H, major), 6.67–6.59 (m, 2.85H, major + minor), 6.11 (d,  $J = 7.7$  Hz, 0.48H, minor), 5.16 (s, 0.25H, minor), 4.92 (s, 1.00H, major), 4.88 (s, 0.99H, major), 4.41 (s, 0.24H, minor), 3.59–3.50 (m, 6.76H, major + minor), 3.35 (s, 0.73H, minor), 3.07 (s, 0.74H, minor), 3.00 (s, 2.94H, major), 2.30 (s, 0.75H, minor), 2.26 (s, 2.96H, major), 1.34 (s, 4.48H, minor), 1.17 (s, 18.08H, major) ppm.  **$^{13}\text{C}$  NMR** (150 MHz,  $\text{CDCl}_3$ )  $\delta$  = 153.6 (minor), 152.9 (minor), 152.7 (major), 152.4 (major), 150.3 (major), 148.9 (minor), 142.2 (minor), 141.9 (major), 141.8 (major), 141.3 (major), 141.2 (minor), 140.8 (minor), 139.5 (major), 139.1 (minor), 137.2 (major), 137.0 (minor), 136.2 (minor), 135.8 (major), 134.9 (minor), 134.6 (major), 133.8 (major), 132.6 (minor), 131.9 (minor), 131.7 (major), 129.2 (minor), 129.0 (major), 128.6 (minor), 128.3 (minor), 127.9 (major), 127.8 (major), 126.9 (major), 126.7 (minor), 126.4 (major + minor), 126.3 (minor), 126.2 (major), 126.1 (minor), 126.0 (minor), 125.7 (major), 125.3 (major), 124.9 (minor),

124.4 (major), 122.4 (minor), 122.2 (2minor), 122.0 (2major), 121.6 (major), 121.0 (major), 120.9 (minor), 120.7 (major), 120.0 (minor), 112.2 (major), 111.7 (minor), 106.8 (major), 106.6 (minor), 54.4 (major + minor), 51.6 (minor), 49.8 (major), 34.3 (minor), 34.1 (major), 30.8 (minor), 30.7 (major), 30.4 (minor), 30.2 (major), 22.8 (major + minor), 21.4 (minor), 21.3 (major) ppm. **IR** (film):  $\bar{\nu}$  = 3613, 3364, 2952, 2922, 1598, 1500, 1431, 1348, 1267, 1160, 1088, 1021, 940, 727, 687, 588  $\text{cm}^{-1}$ . **HRMS** (ESI):  $m/z$  calcd for  $\text{C}_{47}\text{H}_{51}\text{N}_2\text{O}_4\text{S}$  [ $M + \text{H}$ ] $^+$ : 739.3564; found: 739.3553.

***N*-(8-Bromo-3-(3,5-di-*tert*-butyl-4-hydroxyphenyl)-4-methyl-2-phenyl-3,4-dihydrocyclopenta[*b*]indol-1-yl)-*N*-(2-methoxyphenyl)-4-methylbenzenesulfonamide**

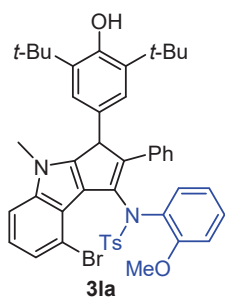

**3la**: According to the above *General Procedure* by using **11** (42.5 mg, 0.1 mmol), **2a** (41.5 mg, 0.11 mmol) and  $\text{FeCl}_3 \cdot 6\text{H}_2\text{O}$  (2.7 mg, 0.01 mmol) in  $\text{CH}_2\text{Cl}_2$  (1.0 mL) for 6.0 h at 25 °C, the chromatographic purification ( $V_{\text{petroleum ether}}/V_{\text{dichloromethane}} = 1/1$ ) afforded **3la** (71.5 mg, 89% yield, 4:1 *dr*, light yellow powder).  **$^1\text{H NMR}$**  (600 MHz,  $\text{CDCl}_3$ , mixed isomers of **3la** (4:1 *dr*))  $\delta$  = 7.88 (d,  $J$  = 8.0 Hz, 0.95H, major), 7.67 (d,  $J$  = 7.7 Hz, 0.20H, minor), 7.63 (d,  $J$  = 8.1 Hz, 0.47H, minor), 7.57 (d,  $J$  = 8.1 Hz, 1.95H, major), 7.48 (d,  $J$  = 8.0 Hz, 0.24H, minor), 7.45 (d,  $J$  = 7.6 Hz, 0.96H, major), 7.29 (d,  $J$  = 8.2 Hz, 0.24H, minor), 7.26–7.23 (m, 1.00H, major), 7.15 (t,  $J$  = 8.1 Hz, 1.00H, major), 7.10–7.01 (m, 1.51H, major + minor), 6.91 (d,  $J$  = 8.2 Hz, 1.49H, major + minor), 6.88–6.82 (m, 3.81H, major + minor), 6.82–6.73 (m, 3.20H, major + minor), 6.72–6.67 (m, 2.27H, major + minor), 6.67–6.63 (m, 2.49H, major + minor), 6.09 (d,  $J$  = 7.8 Hz, 0.46H, minor), 5.20 (s, 0.23H, minor), 4.92 (s, 1.01H, major), 4.89 (s, 1.00H, major), 4.41 (s, 0.23H, minor), 3.544 (s, 2.98H, major), 3.536 (s, 0.69H, minor), 3.52 (s, 2.96H, major), 3.23 (s, 0.69H, minor), 2.27 (s, 0.68H, minor), 2.23 (s, 2.94H, major), 1.35 (s, 4.30H, minor), 1.17 (s, 18.15H, major) ppm.  **$^{13}\text{C NMR}$**  (150 MHz,  $\text{CDCl}_3$ )  $\delta$  = 153.6 (minor), 153.1 (minor), 152.6 (major), 152.5 (major), 151.4 (major), 150.1 (minor), 142.9 (major), 141.9 (major), 141.8 (3minor), 141.6 (major), 139.7 (major), 139.5 (minor), 136.4 (major + 2minor), 135.9 (major), 134.4 (minor), 134.2 (major), 133.9 (major), 132.9 (minor), 129.2 (minor), 129.1 (major), 128.6 (minor), 128.0 (minor), 127.8 (2C, major), 127.6 (minor), 126.8 (major), 126.6 (major + minor), 126.3 (minor), 126.2 (major + minor), 125.8 (major), 125.7 (major), 125.4 (2minor), 125.2 (major), 124.9 (minor), 124.4 (major), 122.9 (minor), 122.6 (major), 121.6 (minor), 121.4 (major + minor), 120.9 (major), 120.3 (major), 119.9 (minor), 114.1 (major + minor), 111.9 (major), 111.3 (minor), 108.4 (major), 108.3 (minor), 54.4 (major), 54.1 (minor), 51.5 (minor), 49.7 (major), 34.3 (minor), 34.1 (major), 31.0 (minor), 30.8 (major), 30.3 (minor), 30.1 (major), 21.3 (major + minor) ppm. **IR** (film):  $\bar{\nu}$  = 3633, 3372, 2956, 1598, 1500, 1433, 1350, 1266, 1159, 1089, 1029, 1003, 726, 679, 662, 588, 543  $\text{cm}^{-1}$ . **HRMS** (ESI):  $m/z$  calcd for  $\text{C}_{46}\text{H}_{48}\text{BrN}_2\text{O}_4\text{S}$  [ $M + \text{H}$ ] $^+$ : 803.2513; found: 803.2507.

***N*-(4-Benzyl-3-(3,5-di-*tert*-butyl-4-hydroxyphenyl)-2-phenyl-3,4-dihydrocyclopenta[*b*]indol-1-yl)-*N*-methylmethanesulfonamide**

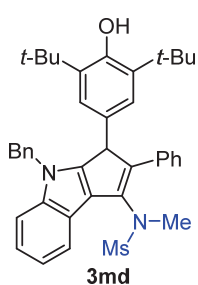

**3md**: According to the above *General Procedure* by using **1m** (42.3 mg, 0.1 mmol), **2d** (23.0 mg, 0.11 mmol) and FeCl<sub>3</sub>·6H<sub>2</sub>O (2.7 mg, 0.01 mmol) in CH<sub>2</sub>Cl<sub>2</sub> (1.0 mL) for 1.5 h at 25 °C, the chromatographic purification ( $V_{\text{petroleum ether}}/V_{\text{dichloromethane}} = 2/1$ ) afforded **3md** (52.5 mg, 83% yield, light brown powder). <sup>1</sup>H NMR (600 MHz, CDCl<sub>3</sub>)  $\delta$  = 7.78 (d,  $J$  = 7.9 Hz, 1H), 7.39 (d,  $J$  = 7.2 Hz, 2H), 7.27–7.21 (m, 2H), 7.20–7.16 (m, 2H), 7.16–7.05 (m, 5H), 6.88 (br, 2H), 6.68 (d,  $J$  = 5.9 Hz, 2H), 5.30 (d,  $J$  = 16.2 Hz, 1H), 5.05–4.91 (m, 2H), 4.77 (br, 1H), 3.54 (s, 3H), 2.80 (br, 3H), 1.24 (s, 18H) ppm. <sup>13</sup>C NMR (150 MHz, CDCl<sub>3</sub>)  $\delta$  = 152.8, 151.9, 140.4 (2C), 136.4 (2C), 135.1, 134.9, 128.4, 128.1 (2C), 127.3, 126.6, 126.4, 125.9, 124.5, 121.0, 120.7, 120.4, 119.6, 117.5, 110.7, 50.7, 48.3, 39.3, 37.1, 34.1, 30.1 ppm. IR (film):  $\bar{\nu}$  = 3630, 3393, 3058, 2957, 1599, 1481, 1453, 1434, 1343, 1145, 1068, 1021, 962, 772, 737, 695 cm<sup>-1</sup>. HRMS (ESI):  $m/z$  calcd for C<sub>40</sub>H<sub>45</sub>N<sub>2</sub>O<sub>3</sub>S [ $M + H$ ]<sup>+</sup>: 633.3145; found: 633.3136.

***N*-(4-Allyl-3-(3,5-di-*tert*-butyl-4-hydroxyphenyl)-2-phenyl-3,4-dihydrocyclopenta[*b*]indol-1-yl)-*N*-methylmethanesulfonamide**

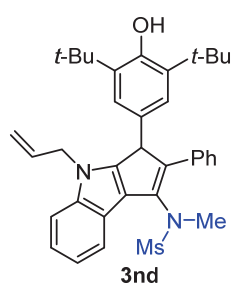

**3nd**: According to the above *General Procedure* by using **1n** (37.3 mg, 0.1 mmol), **2d** (23.0 mg, 0.11 mmol) and FeCl<sub>3</sub>·6H<sub>2</sub>O (2.7 mg, 0.01 mmol) in CH<sub>2</sub>Cl<sub>2</sub> (1.0 mL) for 1.3 h at 25 °C, the chromatographic purification ( $V_{\text{petroleum ether}}/V_{\text{dichloromethane}} = 2/1$ ) afforded **3nd** (57.8 mg, 99% yield, orange powder). <sup>1</sup>H NMR (600 MHz, CDCl<sub>3</sub>)  $\delta$  = 7.76 (d,  $J$  = 7.1 Hz, 1H), 7.39 (d,  $J$  = 7.6 Hz, 2H), 7.28–7.23 (m, 3H), 7.22–7.16 (m, 2H), 7.14 (t,  $J$  = 7.4 Hz, 1H), 6.88 (br, 2H), 5.51–5.36 (m, 1H), 5.03 (s, 1H), 4.94 (d,  $J$  = 10.3 Hz, 1H), 4.90–4.72 (m, 2H), 4.64–4.56 (m, 1H), 4.47 (dd,  $J$  = 16.6, 6.2 Hz, 1H), 3.52 (s, 3H), 2.78 (br, 3H), 1.30 (s, 18H) ppm. <sup>13</sup>C NMR (150 MHz, CDCl<sub>3</sub>)  $\delta$  = 152.8, 151.4, 140.7, 140.1, 136.3, 135.0 (2C), 132.0, 128.1 (2C), 126.6, 125.9, 124.6, 120.9, 120.6, 120.3, 119.7, 117.6, 116.9, 110.4, 50.7, 46.9, 39.3, 37.1, 34.2, 30.2 ppm. IR (film):  $\bar{\nu}$  = 3630, 3399, 3054, 2957, 1598, 1516, 1481, 1455, 1434, 1341, 1146, 1020, 962, 770, 736, 694, 518 cm<sup>-1</sup>. HRMS (ESI):  $m/z$  calcd for C<sub>36</sub>H<sub>43</sub>N<sub>2</sub>O<sub>3</sub>S [ $M + H$ ]<sup>+</sup>: 583.2989; found: 583.2985.

***tert*-Butyl 3-(3,5-di-*tert*-butyl-4-hydroxyphenyl)-1-(*N*-methylmethanesulfonamido)-2-phenylcyclopenta[*b*]indole-4(3*H*)-carboxylate**

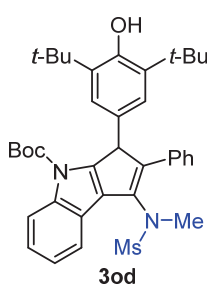

**3od**: According to the above *General Procedure* by using **1o** (43.3 mg, 0.1 mmol), **2d** (23.0 mg, 0.11 mmol) and FeCl<sub>3</sub>·6H<sub>2</sub>O (2.7 mg, 0.01 mmol) in CH<sub>2</sub>Cl<sub>2</sub> (1.0 mL) for 0.5 h at 25 °C, the chromatographic purification ( $V_{\text{petroleum ether}}/V_{\text{dichloromethane}} = 2/1$ ) afforded **3od** (56.6 mg, 88% yield, light yellow powder). <sup>1</sup>H NMR (600 MHz, CDCl<sub>3</sub>)  $\delta$  = 8.30 (br, 1H), 7.90–7.72 (m, 1H), 7.38–7.28 (m, 4H), 7.28–7.15 (m, 3H), 6.60 (br, 2H), 5.14 (br, 1H), 4.98 (s, 1H), 3.38 (br, 3H), 2.56 (s, 3H), 1.32 (s, 9H), 1.22 (s, 18H) ppm. <sup>13</sup>C NMR (150 MHz, CDCl<sub>3</sub>)  $\delta$  = 152.5, 149.2, 146.1, 140.0, 135.6, 134.6, 132.0, 129.3, 128.0, 127.5, 126.3, 126.1, 124.3 (2C), 123.9, 123.3, 122.9, 119.6, 115.9, 83.6, 54.5, 39.6, 37.6, 34.1, 30.1, 27.7 ppm. IR (film):  $\bar{\nu}$  = 3632, 3432, 3055, 2959, 1733, 1594,

1481, 1435, 1339, 1320, 1155, 1119, 963, 738, 701, 518  $\text{cm}^{-1}$ . **HRMS** (ESI):  $m/z$  calcd for  $\text{C}_{38}\text{H}_{47}\text{N}_2\text{O}_5\text{S}$  [ $M + \text{H}$ ] $^+$ : 643.3200; found: 643.3199.

### 3.3. General Procedure for Synthesis of **3aa** on Gram Scale

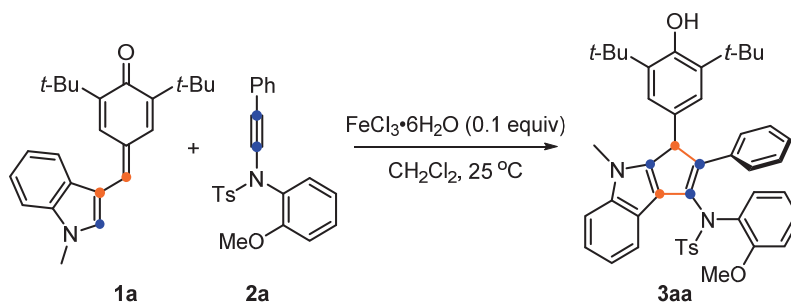

To a solution of indolyl-substituted *p*-quinone methides **1a** (3.0 mmol, 1.041 g) and ynamides **2a** (3.3 mmol, 1.244 g) in  $\text{CH}_2\text{Cl}_2$  (30 mL) was added  $\text{FeCl}_3 \cdot 6\text{H}_2\text{O}$  (0.3 mmol, 81.1 mg). The resulting mixture was stirred at  $25^\circ\text{C}$  for the 1.0 h. The solvent was concentrated under reduced pressure, and then the resulting residue was purified by flash column chromatography on silica gel with the elution of petroleum ether/ dichloromethane ( $V_{\text{petroleum ether}}/V_{\text{dichloromethane}} = 3:1$ ) to give the corresponding products **3aa** (1.760 g, 81% yield, light yellow powder).

## 4. Oxidative Desulfonylation of 3aa

We have investigated a one-pot protocol for the removal of the sulfonyl group at the exocyclic nitrogen of the product **3aa** in the presence of Cs<sub>2</sub>CO<sub>3</sub>. An unusual  $\alpha,\beta$ -unsaturated imine **4aa**, which resulted from an elimination of the sulfonamide moiety in **3aa** via **TS-A**, was isolated in a total yield of 77% yield. This desulfonylation to some extent shows the unique structural influence of aminocyclopenta[*b*]indoles in exocyclic *N*-Ts deprotection.

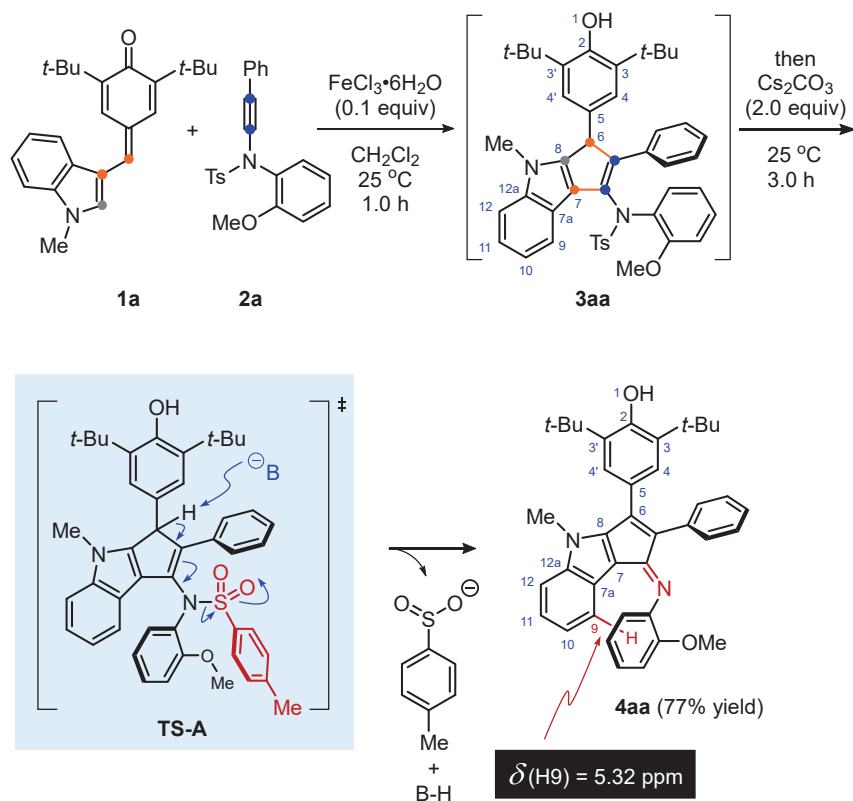

**General Procedure:** To a solution of indolyl-substituted *p*-quinone methide **1a** (34.7 mg, 0.1 mmol) and ynamide **2a** (41.5 mg, 0.11 mmol) in CH<sub>2</sub>Cl<sub>2</sub> (1.0 mL) was added FeCl<sub>3</sub>·6H<sub>2</sub>O (2.7 mg, 0.01 mmol). The resulting mixture was stirred at 25 °C for 1.0 h. At the end of tandem annulation, Cs<sub>2</sub>CO<sub>3</sub> (65.2 mg, 0.2 mmol) was added to the reaction mixture and stirred at 25 °C for 3.0 h. The solvent was concentrated under reduced pressure, and then the resulting residue was purified by flash column chromatography on silica gel with the elution of petroleum ether/dichloromethane (*V*<sub>petroleum ether</sub>/*V*<sub>dichloromethane</sub> = 2/1) to give the corresponding product **4aa** (43.8 mg, 77% yield, light yellow powder). <sup>1</sup>H NMR (600 MHz, CDCl<sub>3</sub>)  $\delta$  = 7.37–7.31 (m, 2H), 7.23–7.18 (m, 3H), 7.17–7.13 (m, 3H), 7.10 (d, *J* = 8.2 Hz, 1H), 7.04–6.98 (m, 2H), 6.97–6.93 (m, 1H), 6.91 (dd, *J* = 7.5, 1.6 Hz, 1H), 6.74 (t, *J* = 7.9 Hz, 1H), 5.32 (d, *J* = 8.2 Hz, 1H), 5.29 (s, 1H), 3.75 (s, 3H), 3.57 (s, 3H), 1.34 (s, 18H) ppm. <sup>13</sup>C NMR (150 MHz, CDCl<sub>3</sub>)  $\delta$  = 163.3, 155.0, 153.9, 150.2, 143.7, 141.9, 139.7, 139.0, 135.8, 133.4, 131.4, 127.4, 126.6, 126.4, 124.6, 123.5, 123.2, 121.7, 121.2, 120.8, 120.6, 119.9, 112.1, 109.7, 106.3, 56.0, 34.3, 31.6, 30.2 ppm. IR (film):  $\bar{\nu}$  = 3627, 3404, 3055, 2957, 1633, 1604, 1490, 1456, 1434, 1385, 1247, 1114, 1025, 744, 696 cm<sup>-1</sup>. HRMS (ESI): *m/z* calcd for C<sub>39</sub>H<sub>41</sub>N<sub>2</sub>O<sub>2</sub> [*M* + H]<sup>+</sup>: 569.3163; found: 569.3155.

For its 2D NMR spectra (<sup>1</sup>H-<sup>1</sup>H COSY, HSQC, and HMBC), please see pages S113-S118.

## 5. Variable Temperature NMR Experiments of Atropisomer 3ab

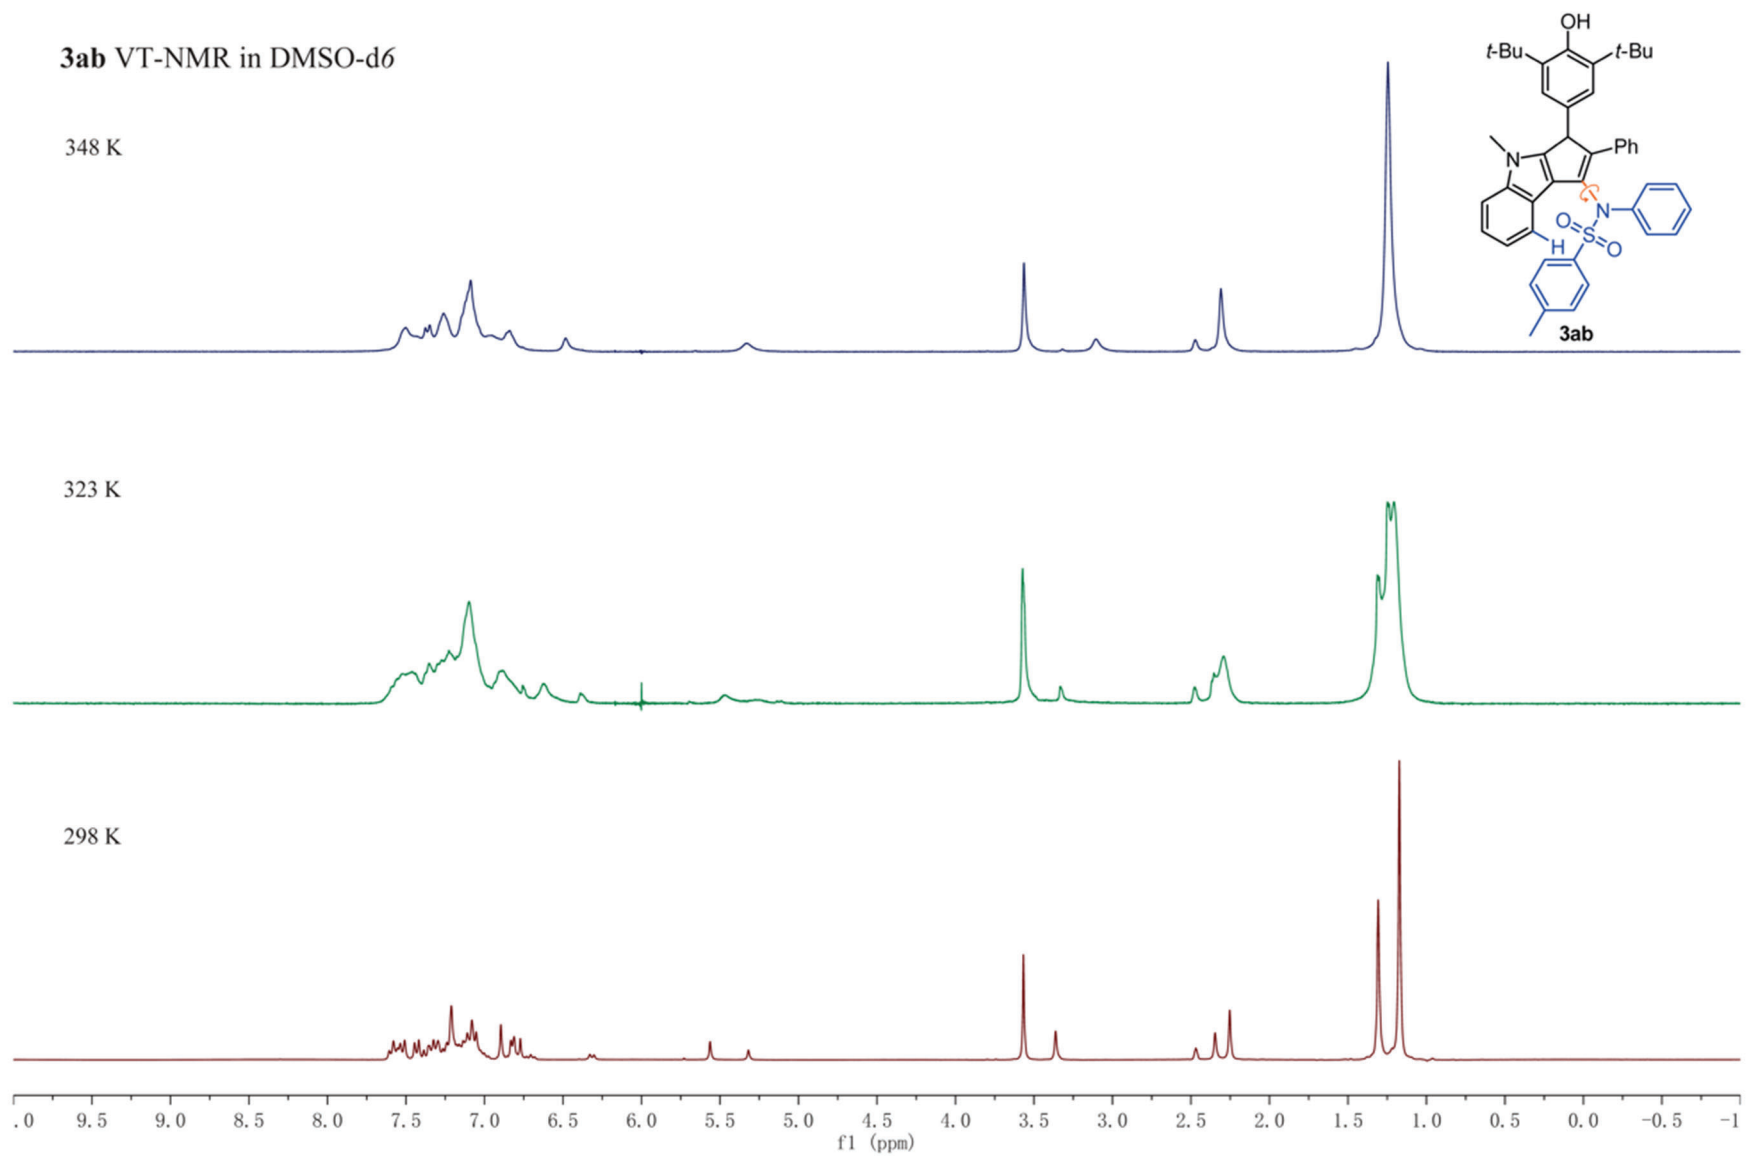

## 6. Determination of the Structure of Products

### 6.1. X-Ray Crystallographic Data of Compound 3ac

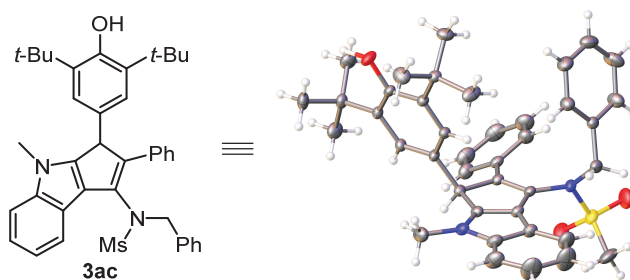

**Figure S3.** ORTEP drawing of **3ac** (20% ellipsoid probability)

The single crystal of **3ac**, which was used for the determination of its relative configurations via X-ray crystallography (Figure S3), was recrystallized from dichloromethane and methanol. The intensity data were collected on an Agilent SuperNova (Dual, Cu at zero, Eos) diffractometer using graphite-monochromated Mo K $\alpha$  radiation.

| Crystal data and structure refinement for <b>3ac</b> |                                                                 |
|------------------------------------------------------|-----------------------------------------------------------------|
| CCDC number                                          | 2152044                                                         |
| Empirical formula                                    | C <sub>40</sub> H <sub>44</sub> N <sub>2</sub> O <sub>3</sub> S |
| Formula weight                                       | 632.83                                                          |
| Temperature/K                                        | 293(2)                                                          |
| Crystal system                                       | monoclinic                                                      |
| Space group                                          | P2 <sub>1</sub> /c                                              |
| a/Å                                                  | 15.3974(8)                                                      |
| b/Å                                                  | 11.0390(5)                                                      |
| c/Å                                                  | 21.2880(11)                                                     |
| $\alpha$ /°                                          | 90.00                                                           |
| $\beta$ /°                                           | 99.266(6)                                                       |
| $\gamma$ /°                                          | 90.00                                                           |
| Volume/Å <sup>3</sup>                                | 3571.2(3)                                                       |
| Z                                                    | 4                                                               |
| $\rho_{\text{calc}}/\text{cm}^3$                     | 1.177                                                           |
| $\mu/\text{mm}^{-1}$                                 | 0.129                                                           |
| F(000)                                               | 1352.0                                                          |
| Crystal size/mm <sup>3</sup>                         | 0.21 × 0.15 × 0.14                                              |
| Radiation                                            | Mo K $\alpha$ ( $\lambda$ = 0.71073)                            |
| 2 $\Theta$ range for data collection/°               | 6.89 to 57.194                                                  |

---

|                                                |                                                               |
|------------------------------------------------|---------------------------------------------------------------|
| Index ranges                                   | $-20 \leq h \leq 18, -12 \leq k \leq 14, -14 \leq l \leq 28$  |
| Reflections collected                          | 14336                                                         |
| Independent reflections                        | 8101 [ $R_{\text{int}} = 0.0473, R_{\text{sigma}} = 0.0886$ ] |
| Data/restraints/parameters                     | 8101/0/425                                                    |
| Goodness-of-fit on $F^2$                       | 1.015                                                         |
| Final R indexes [ $I \geq 2\sigma(I)$ ]        | $R_1 = 0.0684, wR_2 = 0.1322$                                 |
| Final R indexes [all data]                     | $R_1 = 0.1502, wR_2 = 0.1779$                                 |
| Largest diff. peak/hole / $e \text{ \AA}^{-3}$ | 0.18/-0.29                                                    |

---



## 6.2. X-Ray Crystallographic Data of Compound 3ca

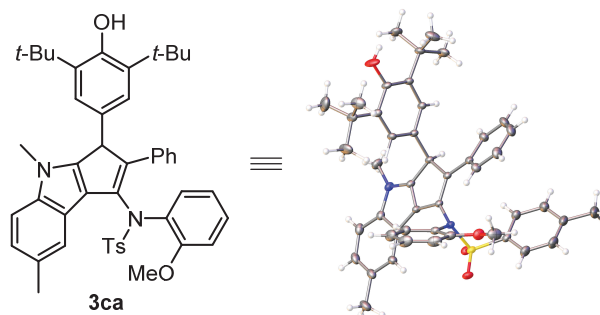

**Figure S4.** ORTEP drawing of **3ca** (20% ellipsoid probability)

The single crystal of **3ca**, which was used for the determination of its relative configurations via X-ray crystallography (Figure S4), was recrystallized from dichloromethane and methanol. The intensity data were collected on a Rigaku XtaLAB Synergy R (DW system, HyPix) diffractometer using graphite-monochromated Cu K $\alpha$  radiation.

---

### Crystal data and structure refinement for **3ca**

---

|                                        |                                                                 |
|----------------------------------------|-----------------------------------------------------------------|
| CCDC number                            | 2152045                                                         |
| Empirical formula                      | C <sub>47</sub> H <sub>50</sub> N <sub>2</sub> O <sub>4</sub> S |
| Formula weight                         | 738.95                                                          |
| Temperature/K                          | 291.7(2)                                                        |
| Crystal system                         | monoclinic                                                      |
| Space group                            | P2 <sub>1</sub> /c                                              |
| a/Å                                    | 10.55370(10)                                                    |
| b/Å                                    | 12.93580(10)                                                    |
| c/Å                                    | 30.0737(3)                                                      |
| $\alpha$ /°                            | 90                                                              |
| $\beta$ /°                             | 93.7820(10)                                                     |
| $\gamma$ /°                            | 90                                                              |
| Volume/Å <sup>3</sup>                  | 4096.74(6)                                                      |
| Z                                      | 4                                                               |
| $\rho_{\text{calc}}/\text{cm}^3$       | 1.198                                                           |
| $\mu/\text{mm}^{-1}$                   | 1.054                                                           |
| F(000)                                 | 1576.0                                                          |
| Crystal size/mm <sup>3</sup>           | 0.11 × 0.07 × 0.05                                              |
| Radiation                              | Cu K $\alpha$ ( $\lambda$ = 1.54184)                            |
| 2 $\Theta$ range for data collection/° | 5.89 to 152.874                                                 |
| Index ranges                           | -11 ≤ h ≤ 13, -16 ≤ k ≤ 15, -37 ≤ l ≤ 37                        |

---

---

|                                                |                                                                  |
|------------------------------------------------|------------------------------------------------------------------|
| Reflections collected                          | 32293                                                            |
| Independent reflections                        | 8231 [ $R_{\text{int}} = 0.0277$ , $R_{\text{sigma}} = 0.0228$ ] |
| Data/restraints/parameters                     | 8231/1/499                                                       |
| Goodness-of-fit on $F^2$                       | 1.045                                                            |
| Final R indexes [ $I \geq 2\sigma(I)$ ]        | $R_1 = 0.0424$ , $wR_2 = 0.1170$                                 |
| Final R indexes [all data]                     | $R_1 = 0.0466$ , $wR_2 = 0.1199$                                 |
| Largest diff. peak/hole / $e \text{ \AA}^{-3}$ | 0.26/-0.33                                                       |

---

### 6.3. X-Ray Crystallographic Data of Compound 3da

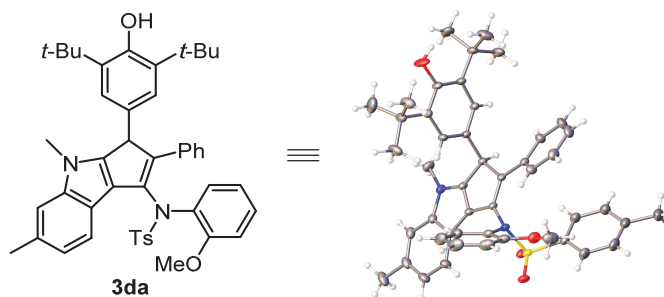

**Figure S5.** ORTEP drawing of **3da** (20% ellipsoid probability)

The single crystal of **3da**, which was used for the determination of its relative configurations via X-ray crystallography (Figure S5), was recrystallized from dichloromethane and methanol. The intensity data were collected on a Rigaku XtaLAB Synergy R (DW system, HyPix) diffractometer using graphite-monochromated Cu K $\alpha$  radiation.

| <b>Crystal data and structure refinement for 3da</b> |                                                                 |
|------------------------------------------------------|-----------------------------------------------------------------|
| CCDC number                                          | 2152046                                                         |
| Empirical formula                                    | C <sub>47</sub> H <sub>50</sub> N <sub>2</sub> O <sub>4</sub> S |
| Formula weight                                       | 738.95                                                          |
| Temperature/K                                        | 302.48(10)                                                      |
| Crystal system                                       | monoclinic                                                      |
| Space group                                          | P2 <sub>1</sub> /c                                              |
| a/Å                                                  | 10.54220(10)                                                    |
| b/Å                                                  | 12.89340(10)                                                    |
| c/Å                                                  | 30.3311(4)                                                      |
| $\alpha$ /°                                          | 90                                                              |
| $\beta$ /°                                           | 95.1050(10)                                                     |
| $\gamma$ /°                                          | 90                                                              |
| Volume/Å <sup>3</sup>                                | 4106.40(7)                                                      |
| Z                                                    | 4                                                               |
| $\rho_{\text{calc}}/\text{cm}^3$                     | 1.195                                                           |
| $\mu/\text{mm}^{-1}$                                 | 1.051                                                           |
| F(000)                                               | 1576.0                                                          |
| Crystal size/mm <sup>3</sup>                         | 0.15 × 0.12 × 0.11                                              |
| Radiation                                            | Cu K $\alpha$ ( $\lambda$ = 1.54184)                            |
| 2 $\Theta$ range for data collection/°               | 5.85 to 152.792                                                 |
| Index ranges                                         | -13 ≤ h ≤ 13, -12 ≤ k ≤ 15, -37 ≤ l ≤ 37                        |

---

|                                                |                                                                  |
|------------------------------------------------|------------------------------------------------------------------|
| Reflections collected                          | 36576                                                            |
| Independent reflections                        | 8265 [ $R_{\text{int}} = 0.0525$ , $R_{\text{sigma}} = 0.0443$ ] |
| Data/restraints/parameters                     | 8265/0/498                                                       |
| Goodness-of-fit on $F^2$                       | 1.083                                                            |
| Final R indexes [ $I \geq 2\sigma(I)$ ]        | $R_1 = 0.0483$ , $wR_2 = 0.1294$                                 |
| Final R indexes [all data]                     | $R_1 = 0.0577$ , $wR_2 = 0.1365$                                 |
| Largest diff. peak/hole / $e \text{ \AA}^{-3}$ | 0.24/-0.42                                                       |

---

## 6.4. X-Ray Crystallographic Data of Compound 3ea

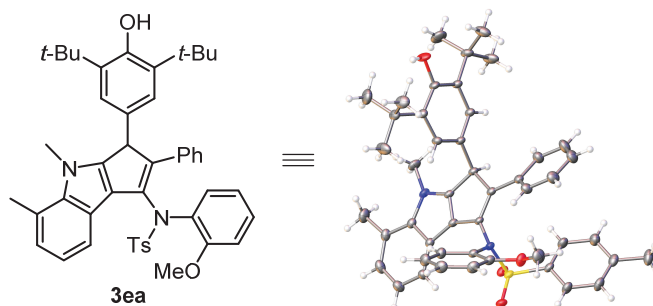

**Figure S6.** ORTEP drawing of **3ea** (20% ellipsoid probability)

The single crystal of **3ea**, which was used for the determination of its relative configurations via X-ray crystallography (Figure S6), was recrystallized from dichloromethane and methanol. The intensity data were collected on a Rigaku XtaLAB Synergy R (DW system, HyPix) diffractometer using graphite-monochromated Cu K $\alpha$  radiation.

---

### Crystal data and structure refinement for **3ea**

---

|                                        |                                                                 |
|----------------------------------------|-----------------------------------------------------------------|
| CCDC number                            | 2152047                                                         |
| Empirical formula                      | C <sub>47</sub> H <sub>50</sub> N <sub>2</sub> O <sub>4</sub> S |
| Formula weight                         | 738.95                                                          |
| Temperature/K                          | 302.34(10)                                                      |
| Crystal system                         | triclinic                                                       |
| Space group                            | P-1                                                             |
| <i>a</i> /Å                            | 12.4470(2)                                                      |
| <i>b</i> /Å                            | 13.1078(3)                                                      |
| <i>c</i> /Å                            | 15.0372(2)                                                      |
| $\alpha$ /°                            | 105.888(2)                                                      |
| $\beta$ /°                             | 96.944(2)                                                       |
| $\gamma$ /°                            | 114.393(2)                                                      |
| Volume/Å <sup>3</sup>                  | 2070.93(7)                                                      |
| <i>Z</i>                               | 2                                                               |
| $\rho_{\text{calc}}/\text{cm}^3$       | 1.185                                                           |
| $\mu/\text{mm}^{-1}$                   | 1.042                                                           |
| <i>F</i> (000)                         | 788.0                                                           |
| Crystal size/mm <sup>3</sup>           | 0.15 × 0.06 × 0.05                                              |
| Radiation                              | Cu K $\alpha$ ( $\lambda$ = 1.54184)                            |
| 2 $\Theta$ range for data collection/° | 6.342 to 152.784                                                |
| Index ranges                           | -15 ≤ <i>h</i> ≤ 15, -16 ≤ <i>k</i> ≤ 16, -18 ≤ <i>l</i> ≤ 17   |

---

---

|                                                |                                                                  |
|------------------------------------------------|------------------------------------------------------------------|
| Reflections collected                          | 26451                                                            |
| Independent reflections                        | 8323 [ $R_{\text{int}} = 0.0484$ , $R_{\text{sigma}} = 0.0489$ ] |
| Data/restraints/parameters                     | 8323/0/498                                                       |
| Goodness-of-fit on $F^2$                       | 1.050                                                            |
| Final R indexes [ $I \geq 2\sigma(I)$ ]        | $R_1 = 0.0469$ , $wR_2 = 0.1247$                                 |
| Final R indexes [all data]                     | $R_1 = 0.0611$ , $wR_2 = 0.1344$                                 |
| Largest diff. peak/hole / $e \text{ \AA}^{-3}$ | 0.20/-0.47                                                       |

---

## 6.5. X-Ray Crystallographic Data of Compound **3fa**

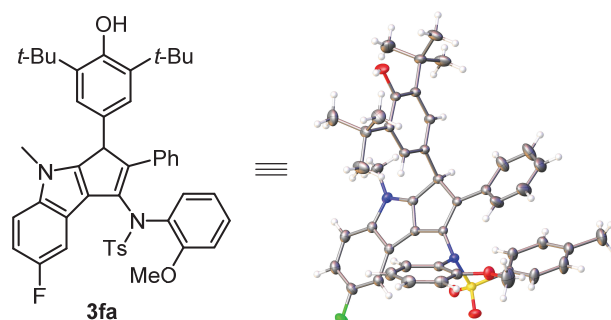

**Figure S7.** ORTEP drawing of **3fa** (20% ellipsoid probability)

The single crystal of **3fa**, which was used for the determination of its relative configurations via X-ray crystallography (Figure S7), was recrystallized from dichloromethane and methanol. The intensity data were collected on an Agilent SuperNova (Dual, Cu at zero, Eos) diffractometer using graphite-monochromated Cu K $\alpha$  radiation.

| <b>Crystal data and structure refinement for 3fa</b> |                                                                  |
|------------------------------------------------------|------------------------------------------------------------------|
| CCDC number                                          | 2152048                                                          |
| Empirical formula                                    | C <sub>46</sub> H <sub>47</sub> FN <sub>2</sub> O <sub>4</sub> S |
| Formula weight                                       | 742.91                                                           |
| Temperature/K                                        | 293(2)                                                           |
| Crystal system                                       | triclinic                                                        |
| Space group                                          | P-1                                                              |
| a/Å                                                  | 12.2295(10)                                                      |
| b/Å                                                  | 12.9142(10)                                                      |
| c/Å                                                  | 14.2096(12)                                                      |
| $\alpha$ /°                                          | 95.174(7)                                                        |
| $\beta$ /°                                           | 99.059(7)                                                        |
| $\gamma$ /°                                          | 113.378(8)                                                       |
| Volume/Å <sup>3</sup>                                | 2005.2(3)                                                        |
| Z                                                    | 2                                                                |
| $\rho_{\text{calc}}/\text{cm}^3$                     | 1.230                                                            |
| $\mu/\text{mm}^{-1}$                                 | 1.117                                                            |
| F(000)                                               | 788.0                                                            |
| Crystal size/mm <sup>3</sup>                         | 0.15 × 0.12 × 0.09                                               |
| Radiation                                            | Cu K $\alpha$ ( $\lambda$ = 1.54184)                             |
| 2 $\Theta$ range for data collection/°               | 9.048 to 133.182                                                 |
| Index ranges                                         | -14 ≤ h ≤ 14, -14 ≤ k ≤ 15, -13 ≤ l ≤ 16                         |

---

|                                                |                                                                  |
|------------------------------------------------|------------------------------------------------------------------|
| Reflections collected                          | 12108                                                            |
| Independent reflections                        | 6924 [ $R_{\text{int}} = 0.0213$ , $R_{\text{sigma}} = 0.0296$ ] |
| Data/restraints/parameters                     | 6924/2/500                                                       |
| Goodness-of-fit on $F^2$                       | 1.027                                                            |
| Final R indexes [ $I \geq 2\sigma(I)$ ]        | $R_1 = 0.0478$ , $wR_2 = 0.1251$                                 |
| Final R indexes [all data]                     | $R_1 = 0.0570$ , $wR_2 = 0.1348$                                 |
| Largest diff. peak/hole / $e \text{ \AA}^{-3}$ | 0.21/-0.37                                                       |

---



## 6.6. X-Ray Crystallographic Data of Compound **3ia**

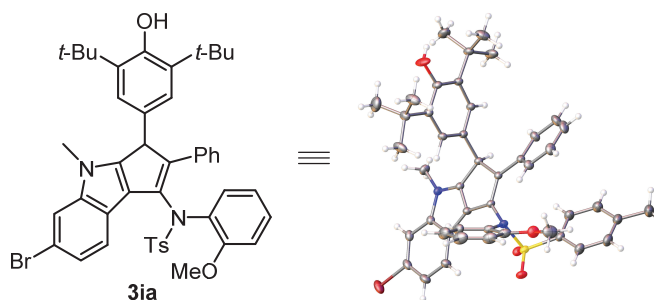

**Figure S8.** ORTEP drawing of **3ia** (20% ellipsoid probability)

The single crystal of **3ia**, which was used for the determination of its relative configurations via X-ray crystallography (Figure S8), was recrystallized from dichloromethane and methanol. The intensity data were collected on a Rigaku XtaLAB Synergy R (DW system, HyPix) diffractometer using graphite-monochromated Cu K $\alpha$  radiation.

| <b>Crystal data and structure refinement for <b>3ia</b></b> |                                                                   |
|-------------------------------------------------------------|-------------------------------------------------------------------|
| CCDC number                                                 | 2152049                                                           |
| Empirical formula                                           | C <sub>46</sub> H <sub>47</sub> BrN <sub>2</sub> O <sub>4</sub> S |
| Formula weight                                              | 803.82                                                            |
| Temperature/K                                               | 303.78(10)                                                        |
| Crystal system                                              | monoclinic                                                        |
| Space group                                                 | P2 <sub>1</sub> /c                                                |
| a/Å                                                         | 10.55960(10)                                                      |
| b/Å                                                         | 12.86910(10)                                                      |
| c/Å                                                         | 30.3703(3)                                                        |
| $\alpha$ /°                                                 | 90                                                                |
| $\beta$ /°                                                  | 96.1700(10)                                                       |
| $\gamma$ /°                                                 | 90                                                                |
| Volume/Å <sup>3</sup>                                       | 4103.19(7)                                                        |
| Z                                                           | 4                                                                 |
| $\rho_{\text{calc}}$ /cm <sup>3</sup>                       | 1.301                                                             |
| $\mu$ /mm <sup>-1</sup>                                     | 2.193                                                             |
| F(000)                                                      | 1680.0                                                            |
| Crystal size/mm <sup>3</sup>                                | 0.18 × 0.15 × 0.12                                                |
| Radiation                                                   | Cu K $\alpha$ ( $\lambda$ = 1.54184)                              |
| 2 $\Theta$ range for data collection/°                      | 5.854 to 152.902                                                  |
| Index ranges                                                | -13 ≤ h ≤ 13, -16 ≤ k ≤ 13, -31 ≤ l ≤ 38                          |

---

|                                                |                                                                  |
|------------------------------------------------|------------------------------------------------------------------|
| Reflections collected                          | 29600                                                            |
| Independent reflections                        | 8255 [ $R_{\text{int}} = 0.0556$ , $R_{\text{sigma}} = 0.0497$ ] |
| Data/restraints/parameters                     | 8255/2/497                                                       |
| Goodness-of-fit on $F^2$                       | 1.045                                                            |
| Final R indexes [ $I \geq 2\sigma(I)$ ]        | $R_1 = 0.0470$ , $wR_2 = 0.1260$                                 |
| Final R indexes [all data]                     | $R_1 = 0.0548$ , $wR_2 = 0.1316$                                 |
| Largest diff. peak/hole / $e \text{ \AA}^{-3}$ | 0.33/-0.76                                                       |

---

## 7. References

- (1) (a) M. Mäurer, W. Hiller, B. Müller and H. B. Stegmann, *Chem. Ber.*, 1992, **125**, 857; (b) D. Richter, N. Hampel, T. Singer, A. R. Ofial and H. Mayr, *Eur. J. Org. Chem.*, 2009, **2009**, 3203; (c) W.-D. Chu, L.-F. Zhang, X. Bao, X.-H. Zhao, C. Zeng, J.-Y. Du, G.-B. Zhang, F.-X. Wang, X.-Y. Ma and C.-A. Fan, *Angew. Chem., Int. Ed.*, 2013, **52**, 9229; (d) Y. F. Wong, Z. Wang, J. Sun, *Org. Biomol. Chem.*, 2016, **14**, 5751; (e) S. Li, Y. Liu, B. Huang, T. Zhou, H. Tao, Y. Xiao, L. Liu, J. Zhang, *ACS Catal.*, 2017, **7**, 2805.
- (2) (a) B. Yao, Z. Liang, T. Niu and Y. Zhang, *J. Org. Chem.*, 2009, **74**, 4630; (b) C. Schotes and A. Mezzetti, *Angew. Chem., Int. Ed.*, 2011, **50**, 3072; (c) A. S. Reddy and K. C. K. Swamy, *Angew. Chem., Int. Ed.*, 2017, **56**, 6984; (d) T. Hamada, X. Ye and S. S. Stahl, *J. Am. Chem. Soc.*, 2008, **130**, 833; (e) A. Mukherjee, R. B. Dateer, R. Chaudhuri, S. Bhunia, S. N. Karad and R.-S. Liu, *J. Am. Chem. Soc.*, 2011, **133**, 15372; (f) C. Schotes, R. Bigler and A. Mezzetti, *Synthesis*, 2012, **44**, 513.

## 8. Copies of NMR Spectra

7.805  
7.791  
7.710  
7.706  
7.463  
7.382  
7.374  
7.368  
7.354  
7.353  
7.343  
7.341  
7.329  
7.328  
7.288  
7.286  
7.274  
7.273  
7.263  
7.261  
7.244  
7.112  
7.109

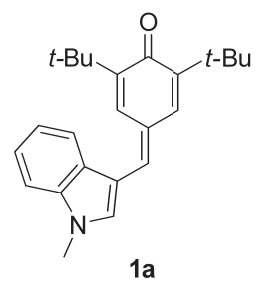

— 3.888

< 1.375  
< 1.367

— 0.000

Current Data Parameters  
 NAME 5-H  
 EXPNO 10  
 PROCNO 1

F2 - Acquisition Parameters  
 Date\_ 20210810  
 Time 9.53 h  
 INSTRUM Avance  
 PROBHD z114607\_0847 (  
 PULPROG zg30  
 TD 65536  
 SOLVENT CDC13  
 NS 4  
 DS 2  
 SWH 11904.762 Hz  
 FIDRES 0.363304 Hz  
 AQ 2.7525120 sec  
 RG 47.619  
 DW 42.000 usec  
 DE 8.79 usec  
 TE 298.0 K  
 D1 1.00000000 sec  
 TD0 1  
 SFO1 600.1337058 MHz  
 NUC1 1H  
 P0 3.33 usec  
 P1 10.00 usec  
 PLW1 25.31200027 W

F2 - Processing parameters  
 SI 65536  
 SF 600.1300247 MHz  
 WDW EM  
 SSB 0  
 LB 0.30 Hz  
 GB 0  
 PC 1.00

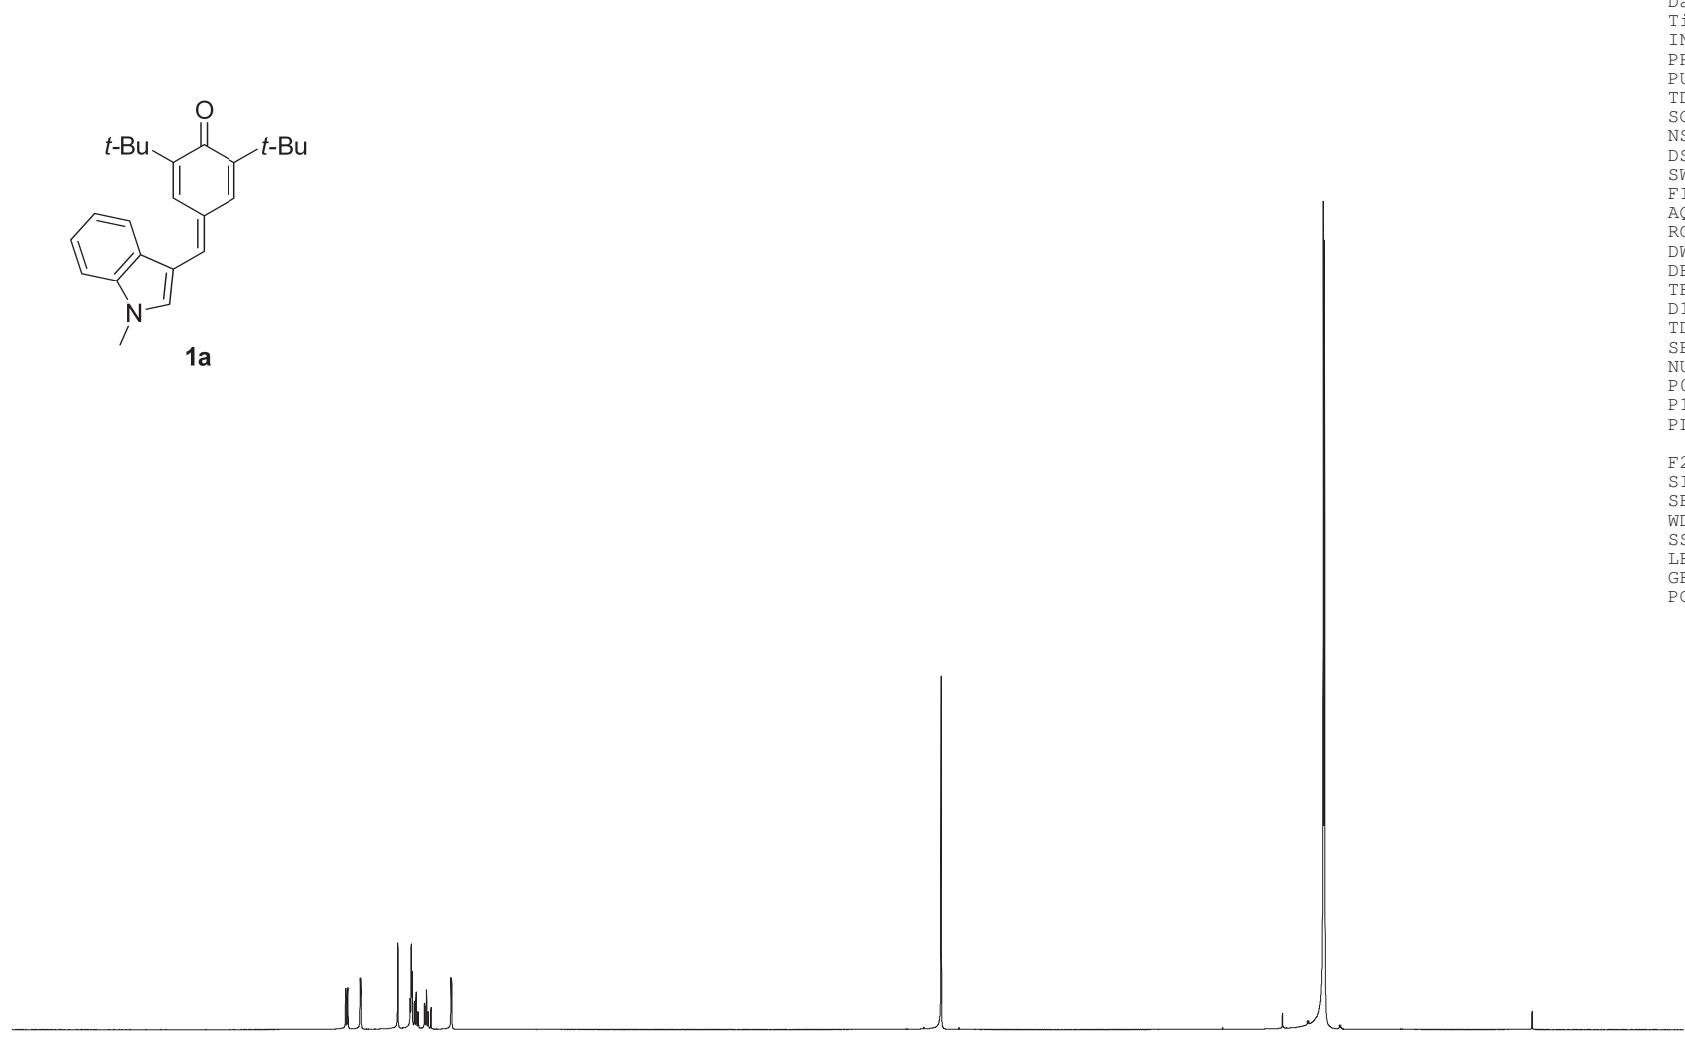

1.01  
1.01  
1.09  
2.12  
1.02  
1.02  
1.02

3.00

9.05  
9.05

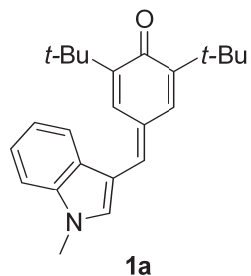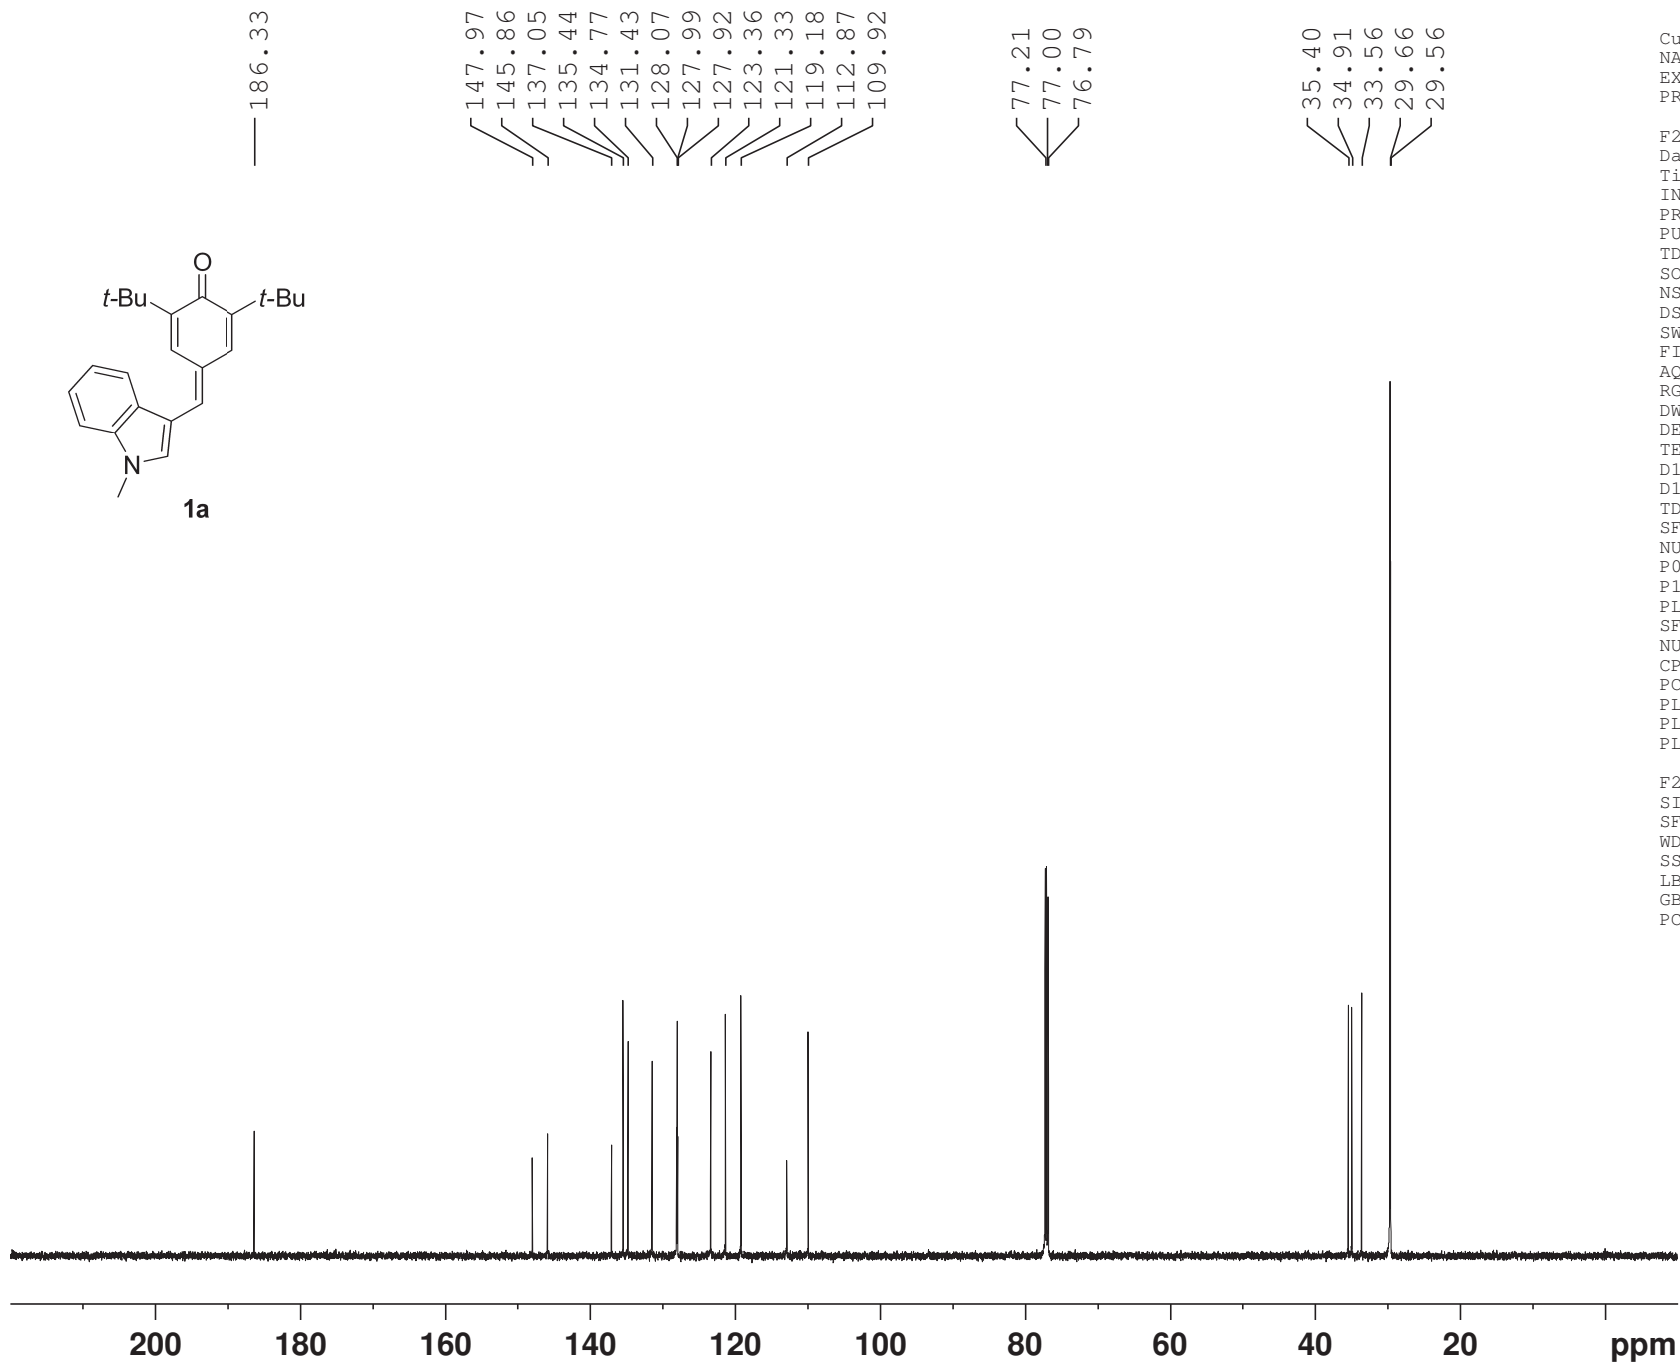

Current Data Parameters  
 NAME 5-H  
 EXPNO 11  
 PROCNO 1

F2 - Acquisition Parameters  
 Date\_ 20210810  
 Time 9.59 h  
 INSTRUM Avance  
 PROBHD Z114607\_0847 (  
 PULPROG zgpg30  
 TD 65536  
 SOLVENT CDC13  
 NS 128  
 DS 4  
 SWH 37037.035 Hz  
 FIDRES 1.130281 Hz  
 AQ 0.8847360 sec  
 RG 101  
 DW 13.500 usec  
 DE 6.50 usec  
 TE 298.1 K  
 D1 2.00000000 sec  
 D11 0.03000000 sec  
 TD0 1  
 SFO1 150.9194079 MHz  
 NUC1 13C  
 P0 4.00 usec  
 P1 12.00 usec  
 PLW1 87.25299835 W  
 SFO2 600.1324005 MHz  
 NUC2 1H  
 CPDPRG[2] waltz65  
 PCPD2 70.00 usec  
 PLW2 25.31200027 W  
 PLW12 0.51656997 W  
 PLW13 0.25983000 W

F2 - Processing parameters  
 SI 32768  
 SF 150.9028178 MHz  
 WDW EM  
 SSB 0  
 LB 1.00 Hz  
 GB 0  
 PC 1.40

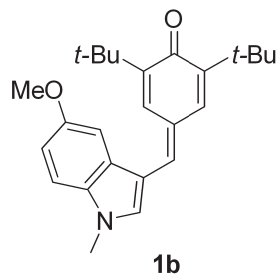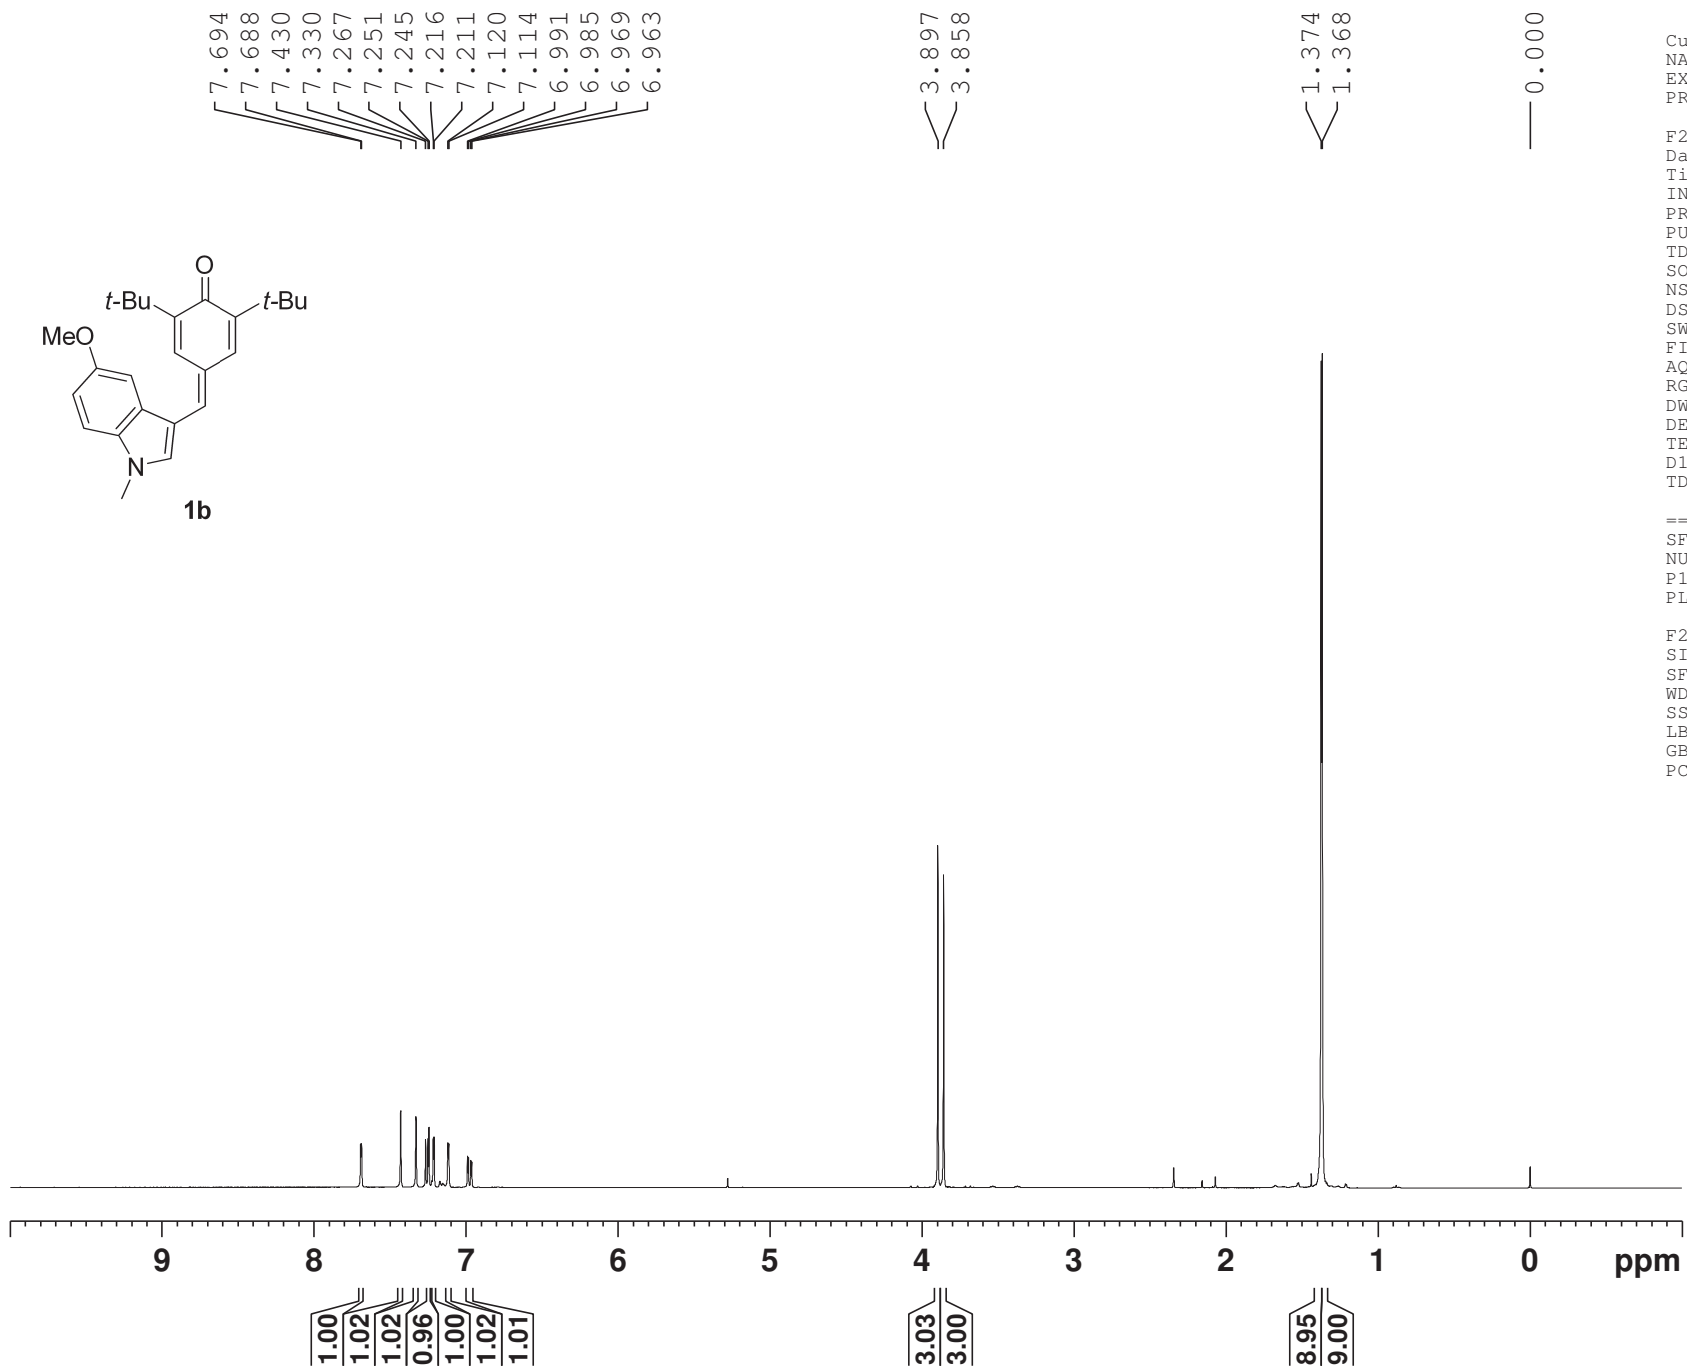

Current Data Parameters  
 NAME 5-OMe  
 EXPNO 10  
 PROCNO 1

F2 - Acquisition Parameters  
 Date\_ 20180608  
 Time 8.19  
 INSTRUM spect  
 PROBHD 5 mm PABBO BB/  
 PULPROG zg30  
 TD 65536  
 SOLVENT CDCl3  
 NS 4  
 DS 2  
 SWH 8012.820 Hz  
 FIDRES 0.122266 Hz  
 AQ 4.089465 sec  
 RG 161  
 DW 62.400 usec  
 DE 6.50 usec  
 TE 295.8 K  
 D1 1.00000000 sec  
 TD0 1

==== CHANNEL f1 =====  
 SFO1 400.1324710 MHz  
 NUC1 1H  
 P1 12.40 usec  
 PLW1 19.00000000 W

F2 - Processing parameters  
 SI 65536  
 SF 400.1300132 MHz  
 WDW EM  
 SSB 0  
 LB 0.30 Hz  
 GB 0  
 PC 1.00

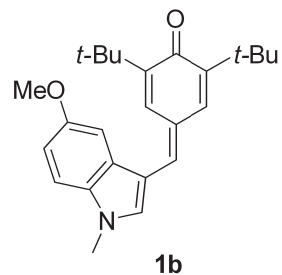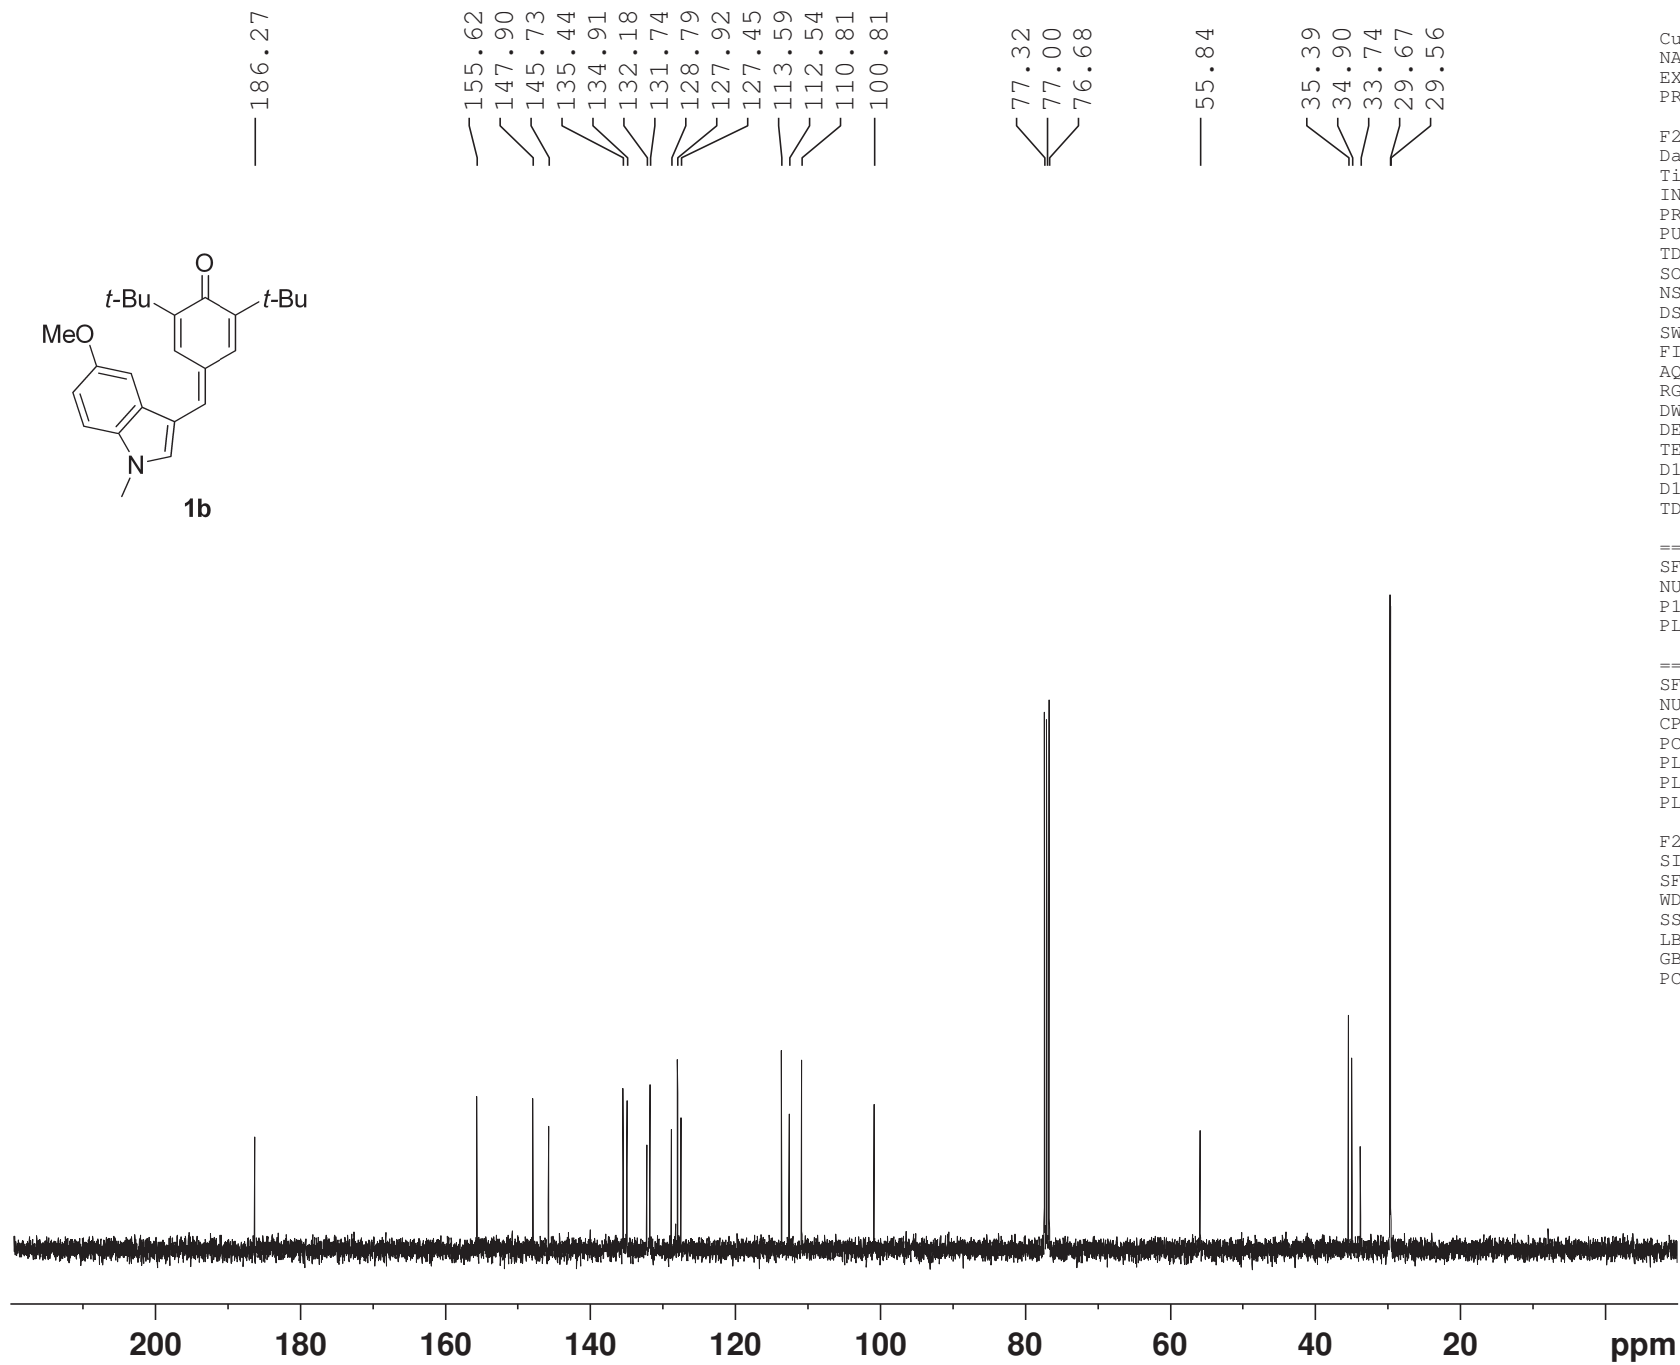

Current Data Parameters  
 NAME 5-Ome  
 EXPNO 11  
 PROCNO 1

F2 - Acquisition Parameters  
 Date\_ 20180608  
 Time 8.21  
 INSTRUM spect  
 PROBHD 5 mm PABBO BB/  
 PULPROG zgpg30  
 TD 65536  
 SOLVENT CDCl3  
 NS 32  
 DS 2  
 SWH 24038.461 Hz  
 FIDRES 0.366798 Hz  
 AQ 1.3631488 sec  
 RG 2050  
 DW 20.800 usec  
 DE 6.50 usec  
 TE 296.4 K  
 D1 2.00000000 sec  
 D11 0.03000000 sec  
 TDO 1

==== CHANNEL f1 =====  
 SFO1 100.6228298 MHz  
 NUC1 13C  
 P1 15.50 usec  
 PLW1 25.00000000 W

==== CHANNEL f2 =====  
 SFO2 400.1316005 MHz  
 NUC2 1H  
 CPDPRG[2] waltz16  
 PCPD2 80.00 usec  
 PLW2 19.50000000 W  
 PLW12 0.51492000 W  
 PLW13 0.32955000 W

F2 - Processing parameters  
 SI 32768  
 SF 100.6127741 MHz  
 WDW EM  
 SSB 0  
 LB 1.00 Hz  
 GB 0  
 PC 1.40

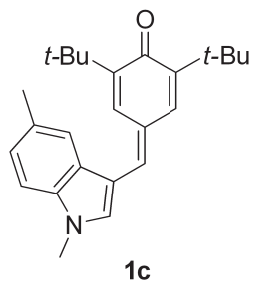

7.710  
7.704  
7.581  
7.386  
7.327  
7.228  
7.217  
7.207  
7.146  
7.143  
7.125  
7.122  
7.098  
7.092

— 3.801

— 2.483

< 1.379  
< 1.373

— 0.000

Current Data Parameters  
NAME 5-Me  
EXPNO 10  
PROCNO 1

F2 - Acquisition Parameters  
Date\_ 20180720  
Time 9.03  
INSTRUM spect  
PROBHD 5 mm PABBO BB/  
PULPROG zg30  
TD 65536  
SOLVENT CDCl3  
NS 4  
DS 2  
SWH 8012.820 Hz  
FIDRES 0.122266 Hz  
AQ 4.089465 sec  
RG 80.6  
DW 62.400 usec  
DE 6.50 usec  
TE 296.0 K  
D1 1.00000000 sec  
TD0 1

==== CHANNEL f1 =====  
SFO1 400.1324710 MHz  
NUC1 1H  
P1 12.40 usec  
PLW1 19.00000000 W

F2 - Processing parameters  
SI 65536  
SF 400.1300266 MHz  
WDW EM  
SSB 0  
LB 0.30 Hz  
GB 0  
PC 1.00

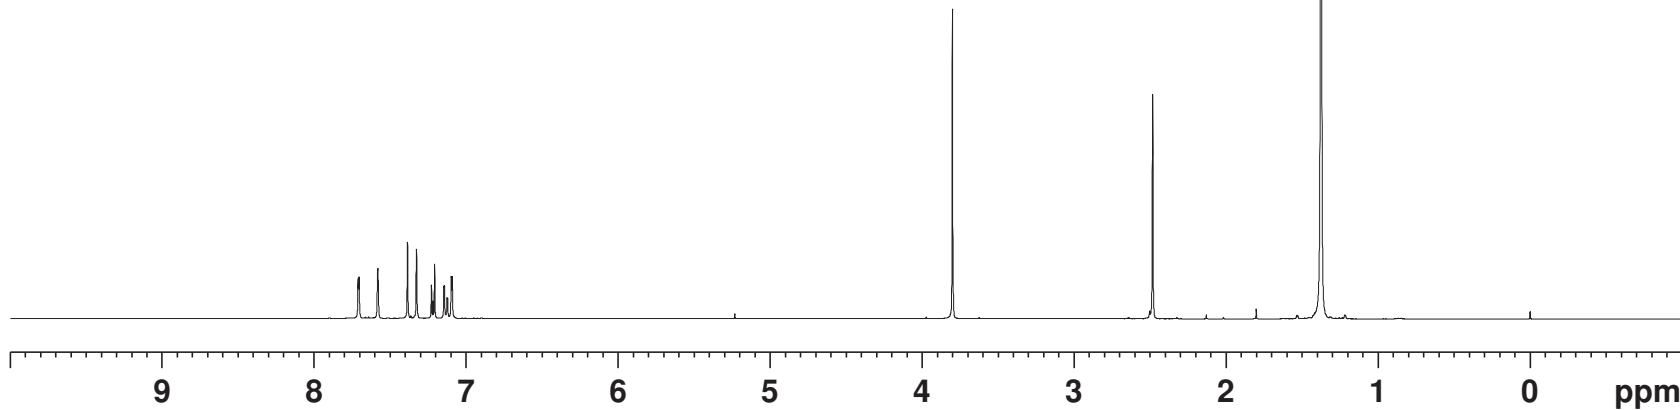

1.02  
1.01  
1.00  
1.02  
1.12  
1.04  
1.01

3.00

2.95

9.04  
9.03



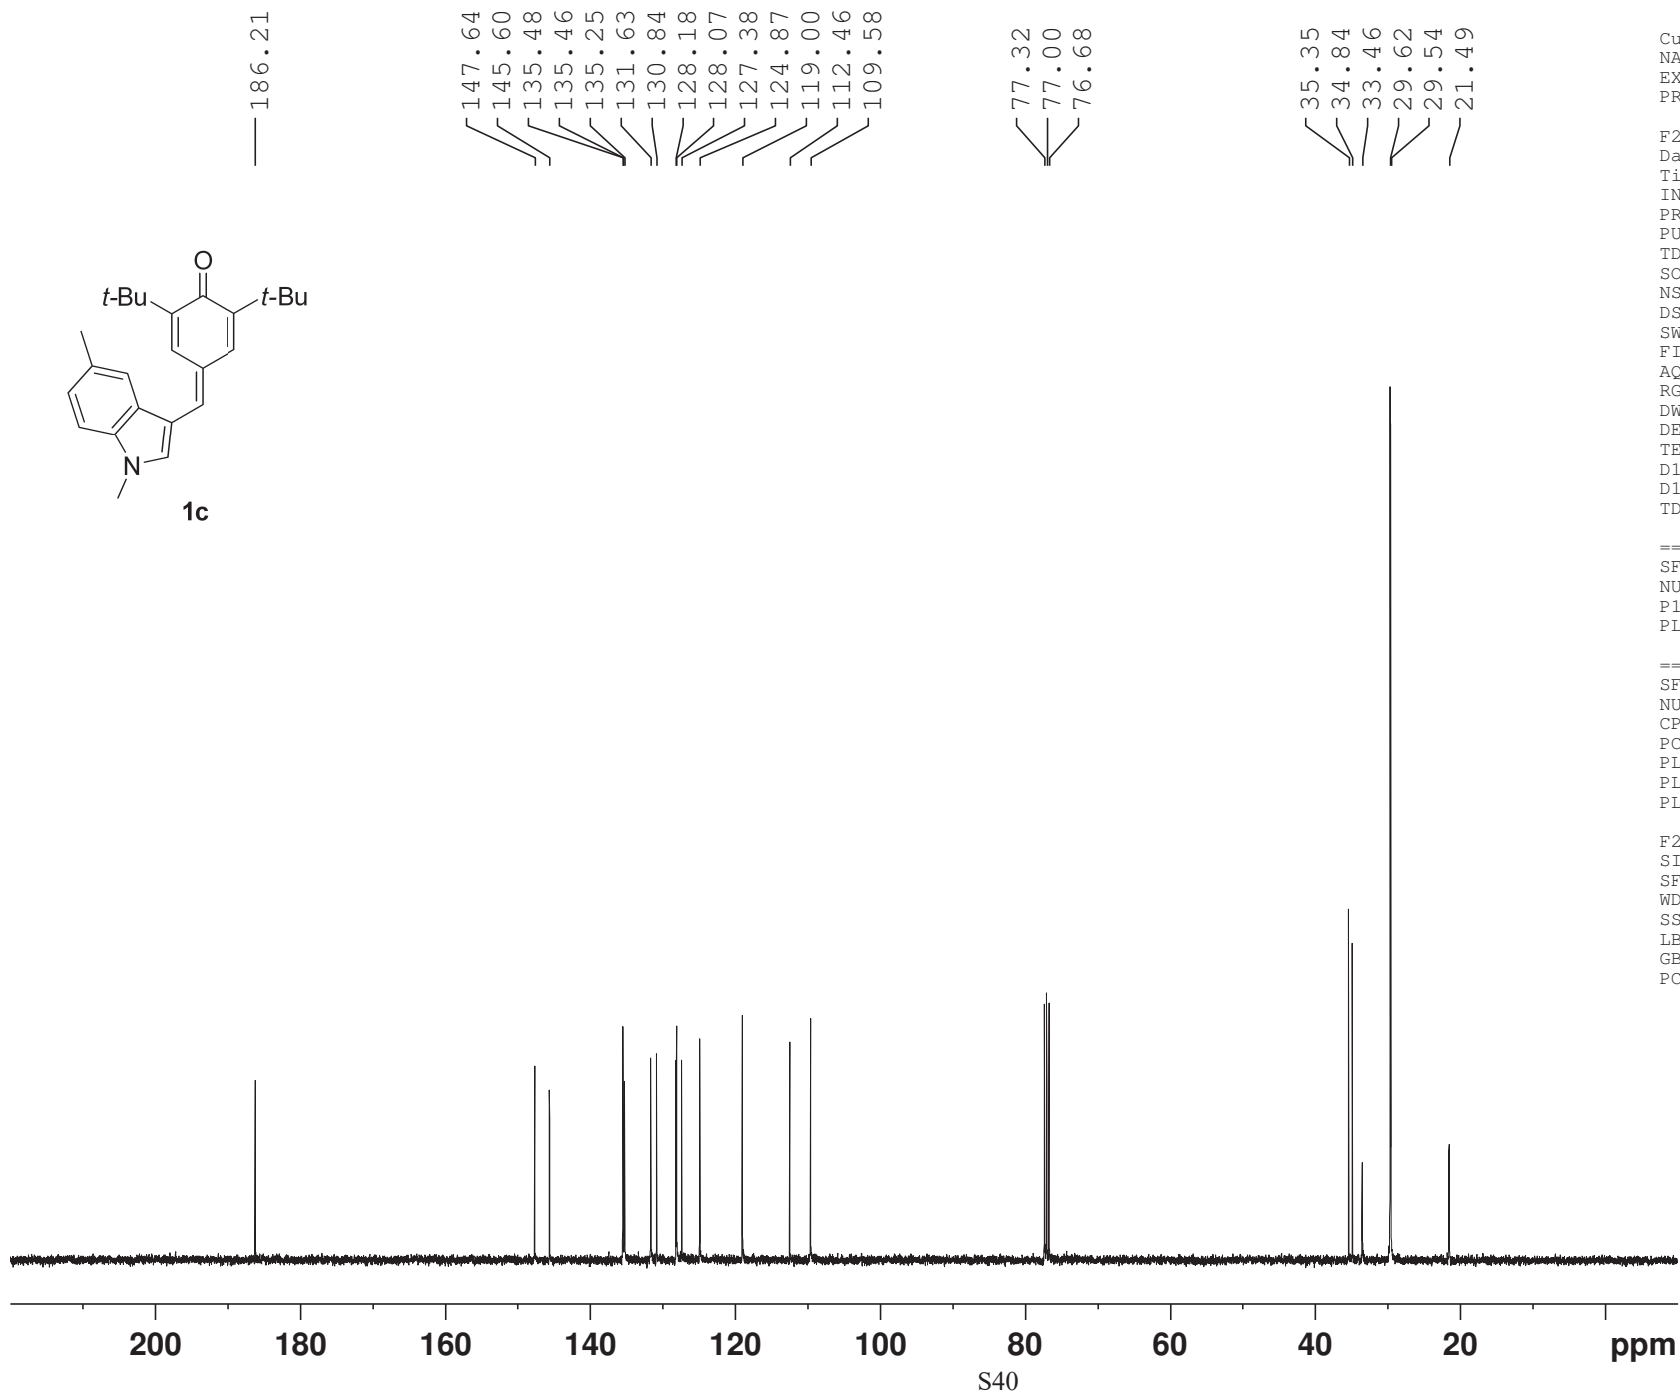

Current Data Parameters  
 NAME 5-Me  
 EXPNO 11  
 PROCNO 1

F2 - Acquisition Parameters  
 Date\_ 20180720  
 Time 9.07  
 INSTRUM spect  
 PROBHD 5 mm PABBO BB/  
 PULPROG zgpg30  
 TD 65536  
 SOLVENT CDCl3  
 NS 64  
 DS 2  
 SWH 25252.525 Hz  
 FIDRES 0.385323 Hz  
 AQ 1.2976128 sec  
 RG 2050  
 DW 19.800 usec  
 DE 6.50 usec  
 TE 296.7 K  
 D1 2.00000000 sec  
 D11 0.03000000 sec  
 TDO 1

==== CHANNEL f1 =====  
 SFO1 100.6238364 MHz  
 NUC1 13C  
 P1 15.50 usec  
 PLW1 25.00000000 W

==== CHANNEL f2 =====  
 SFO2 400.1316005 MHz  
 NUC2 1H  
 CPDPRG[2] waltz16  
 PCPD2 80.00 usec  
 PLW2 19.50000000 W  
 PLW12 0.51492000 W  
 PLW13 0.32955000 W

F2 - Processing parameters  
 SI 32768  
 SF 100.6127822 MHz  
 WDW EM  
 SSB 0  
 LB 1.00 Hz  
 GB 0  
 PC 1.40

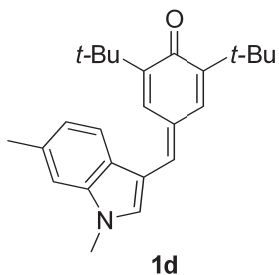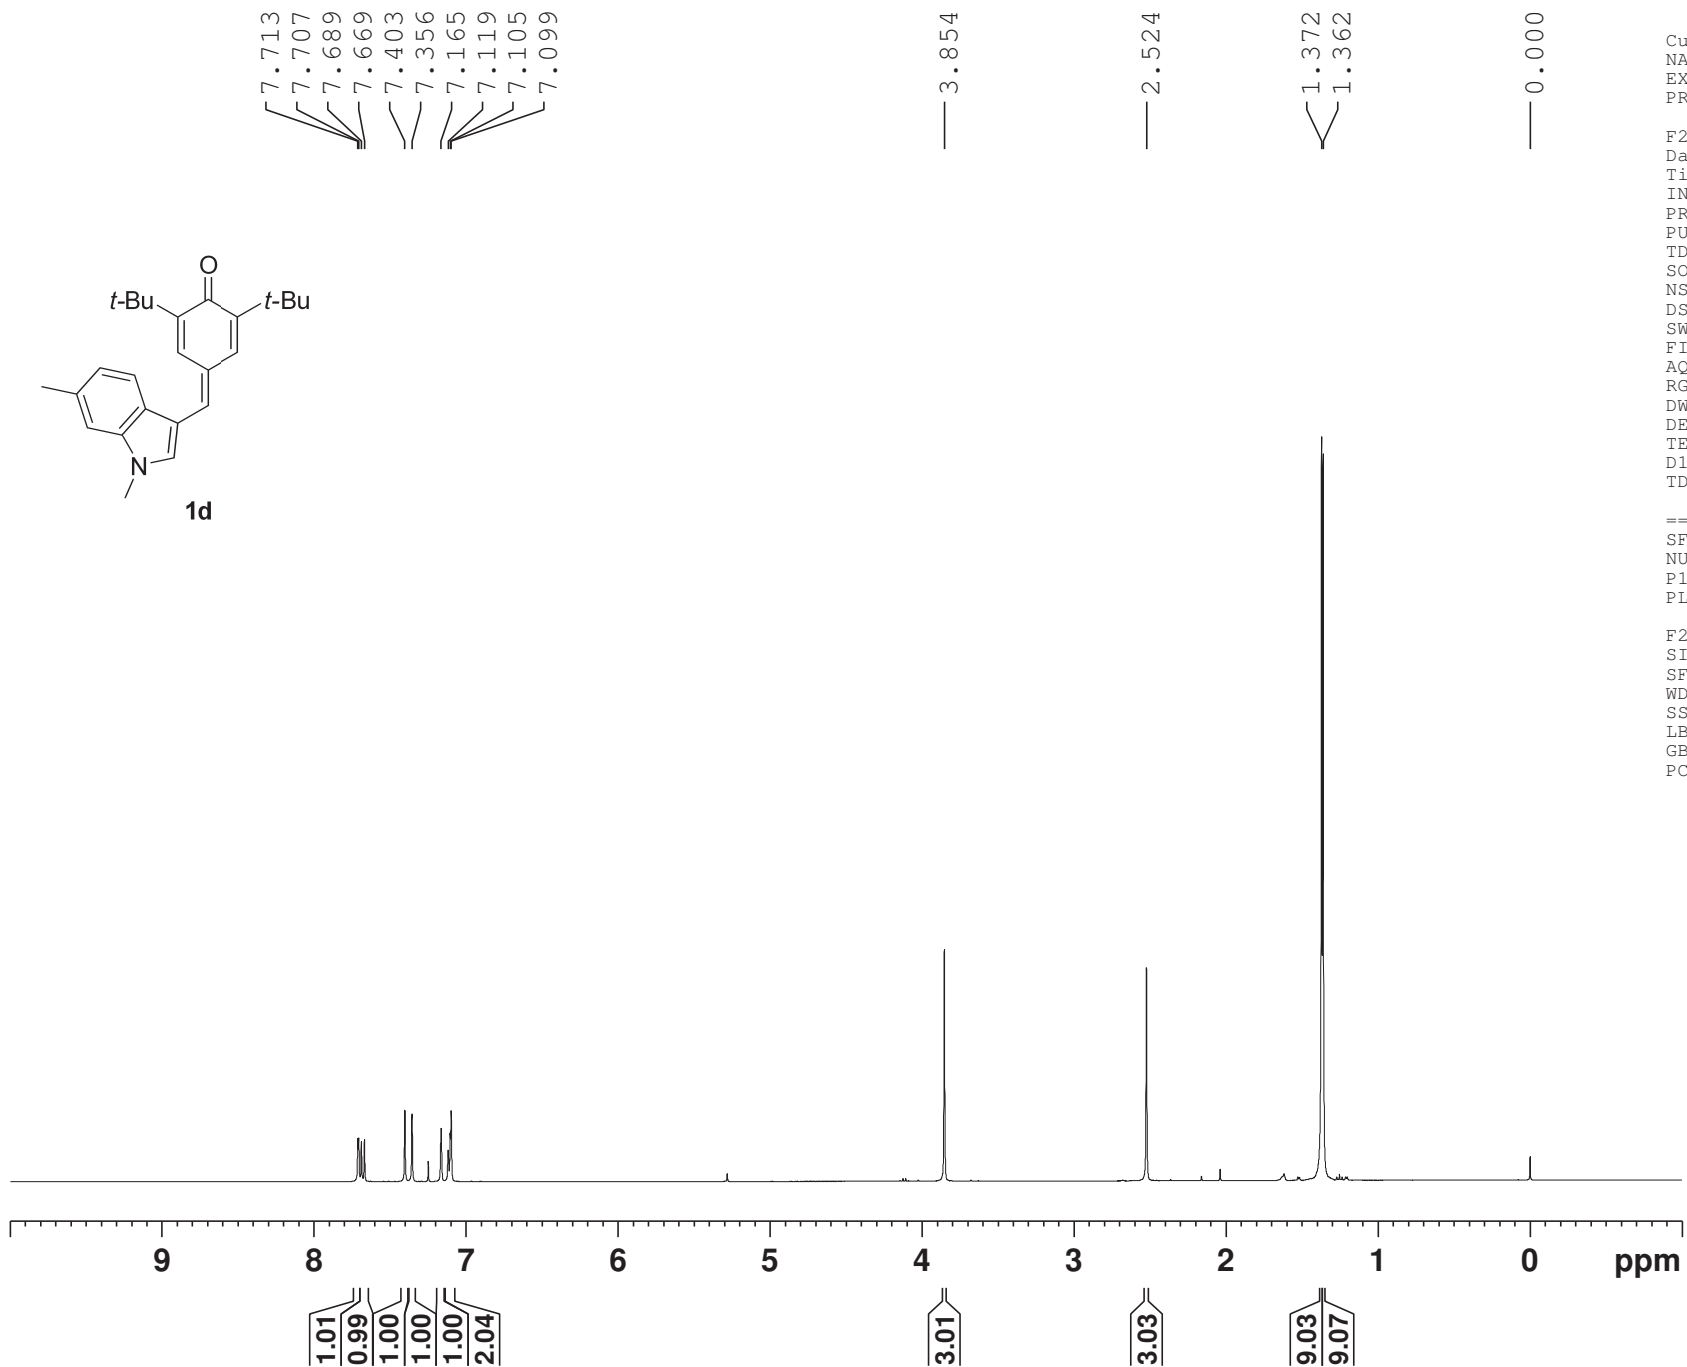

Current Data Parameters  
 NAME 6-Me  
 EXPNO 10  
 PROCNO 1

F2 - Acquisition Parameters  
 Date\_ 20180810  
 Time 9.17  
 INSTRUM spect  
 PROBHD 5 mm PABBO BB/  
 PULPROG zg30  
 TD 65536  
 SOLVENT CDCl3  
 NS 4  
 DS 2  
 SWH 8012.820 Hz  
 FIDRES 0.122266 Hz  
 AQ 4.0894465 sec  
 RG 114  
 DW 62.400 usec  
 DE 6.50 usec  
 TE 293.8 K  
 D1 1.00000000 sec  
 TD0 1

==== CHANNEL f1 =====  
 SFO1 400.1324710 MHz  
 NUC1 1H  
 P1 12.40 usec  
 PLW1 19.00000000 W

F2 - Processing parameters  
 SI 65536  
 SF 400.1300139 MHz  
 WDW EM  
 SSB 0  
 LB 0.30 Hz  
 GB 0  
 PC 1.00

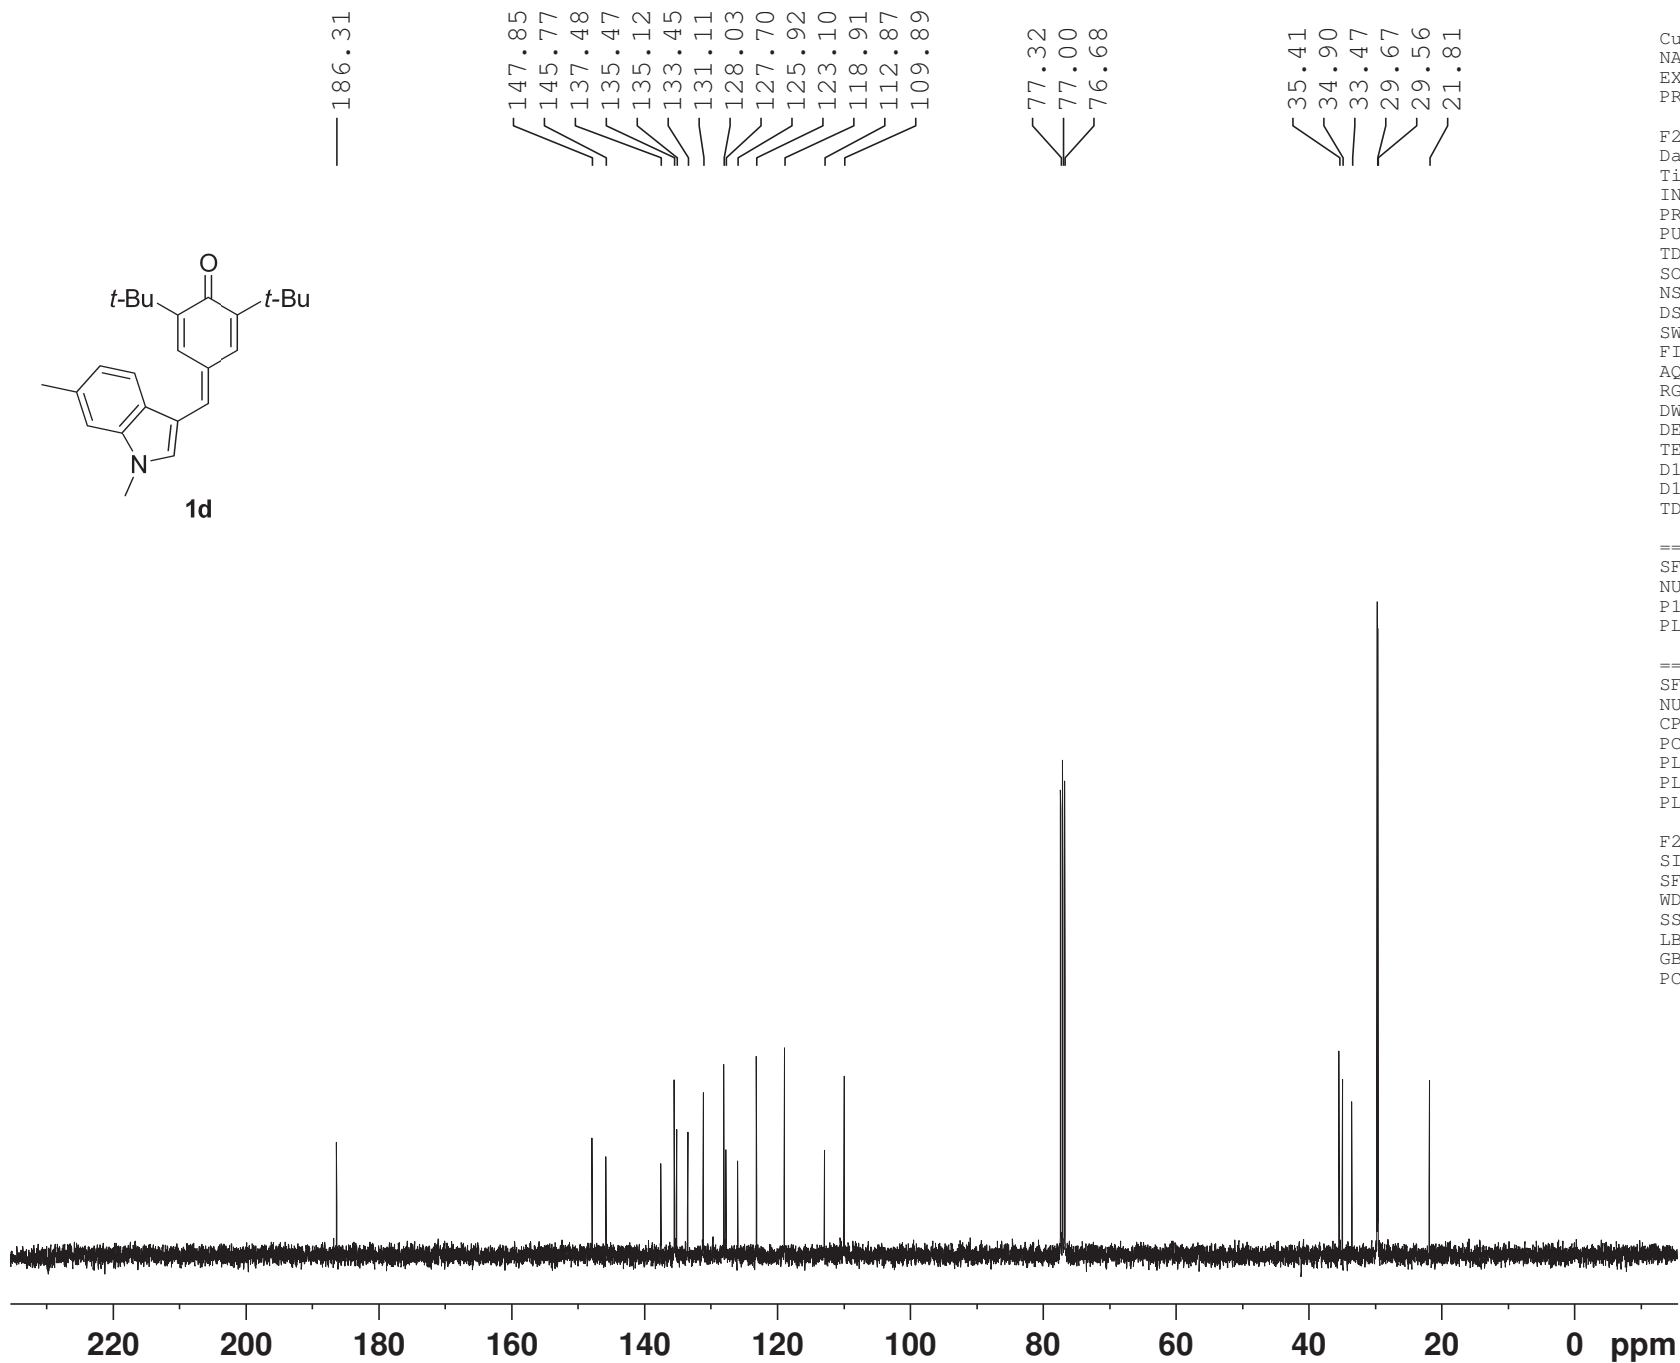

S42

Current Data Parameters  
 NAME 6-Me  
 EXPNO 11  
 PROCNO 1

F2 - Acquisition Parameters  
 Date\_ 20180810  
 Time 9.21  
 INSTRUM spect  
 PROBHD 5 mm PABBO BB/  
 PULPROG zgpg30  
 TD 65536  
 SOLVENT CDCl3  
 NS 64  
 DS 2  
 SWH 25252.525 Hz  
 FIDRES 0.385323 Hz  
 AQ 1.2976128 sec  
 RG 2050  
 DW 19.800 usec  
 DE 6.50 usec  
 TE 295.1 K  
 D1 2.00000000 sec  
 D11 0.03000000 sec  
 TDO 1

===== CHANNEL f1 =====  
 SFO1 100.6238364 MHz  
 NUC1 13C  
 P1 15.50 usec  
 PLW1 25.00000000 W

===== CHANNEL f2 =====  
 SFO2 400.1316005 MHz  
 NUC2 1H  
 CPDPRG[2] waltz16  
 PCPD2 80.00 usec  
 PLW2 19.50000000 W  
 PLW12 0.51492000 W  
 PLW13 0.32955000 W

F2 - Processing parameters  
 SI 32768  
 SF 100.6127729 MHz  
 WDW EM  
 SSB 0  
 LB 1.00 Hz  
 GB 0  
 PC 1.40

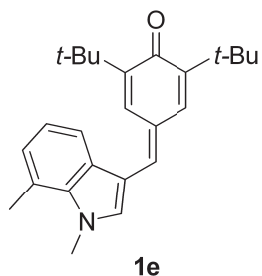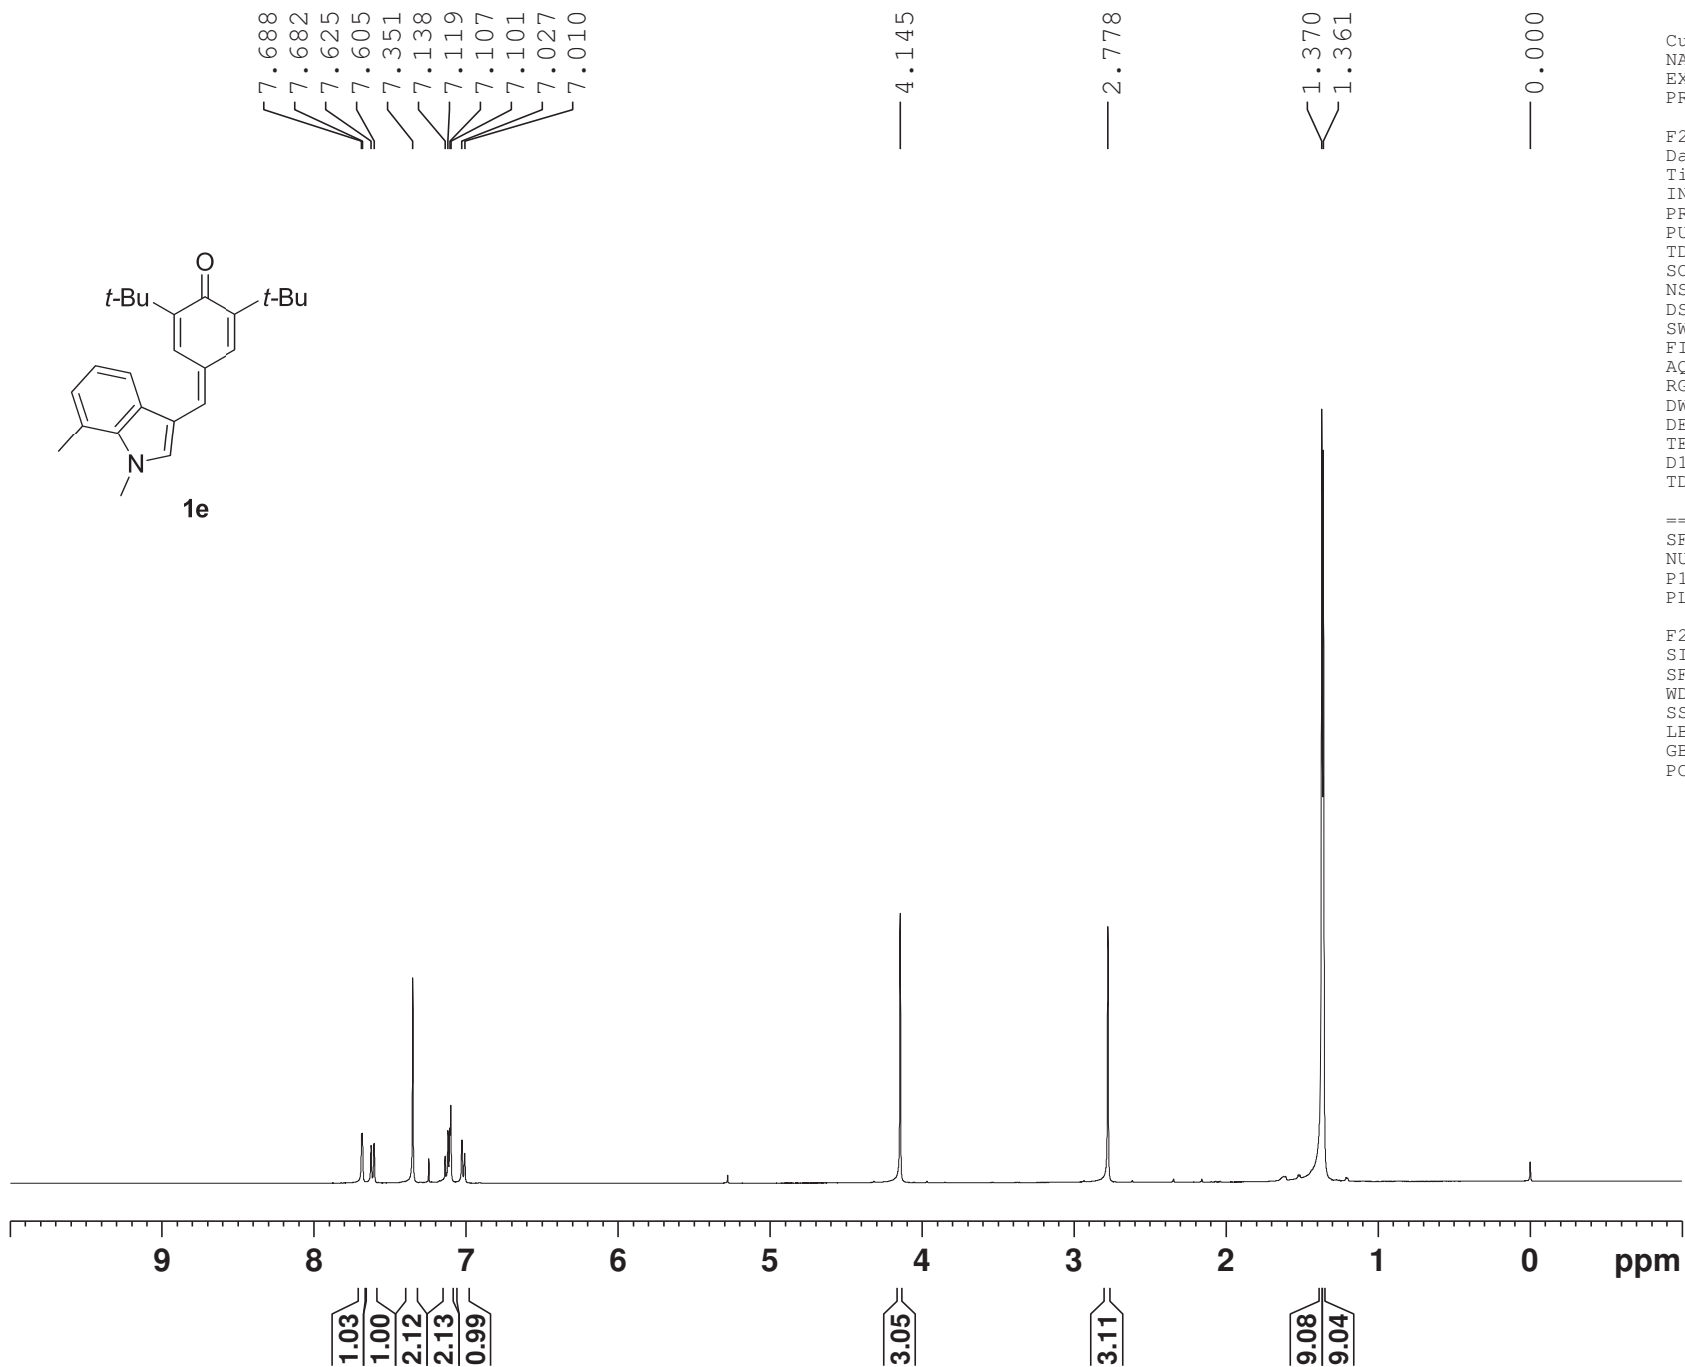

7.688  
7.682  
7.625  
7.605  
7.351  
7.138  
7.119  
7.107  
7.101  
7.027  
7.010

4.145

2.778

1.370  
1.361

0.000

Current Data Parameters  
NAME 7-Me  
EXPNO 10  
PROCNO 1

F2 - Acquisition Parameters  
Date\_ 20180810  
Time 8.28  
INSTRUM spect  
PROBHD 5 mm PABBO BB/  
PULPROG zg30  
TD 65536  
SOLVENT CDCl3  
NS 4  
DS 2  
SWH 8012.820 Hz  
FIDRES 0.122266 Hz  
AQ 4.0894465 sec  
RG 114  
DW 62.400 usec  
DE 6.50 usec  
TE 294.1 K  
D1 1.00000000 sec  
TD0 1

==== CHANNEL f1 =====  
SFO1 400.1324710 MHz  
NUC1 1H  
P1 12.40 usec  
PLW1 19.00000000 W

F2 - Processing parameters  
SI 65536  
SF 400.1300152 MHz  
WDW EM  
SSB 0  
LB 0.30 Hz  
GB 0  
PC 1.00

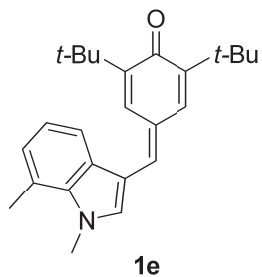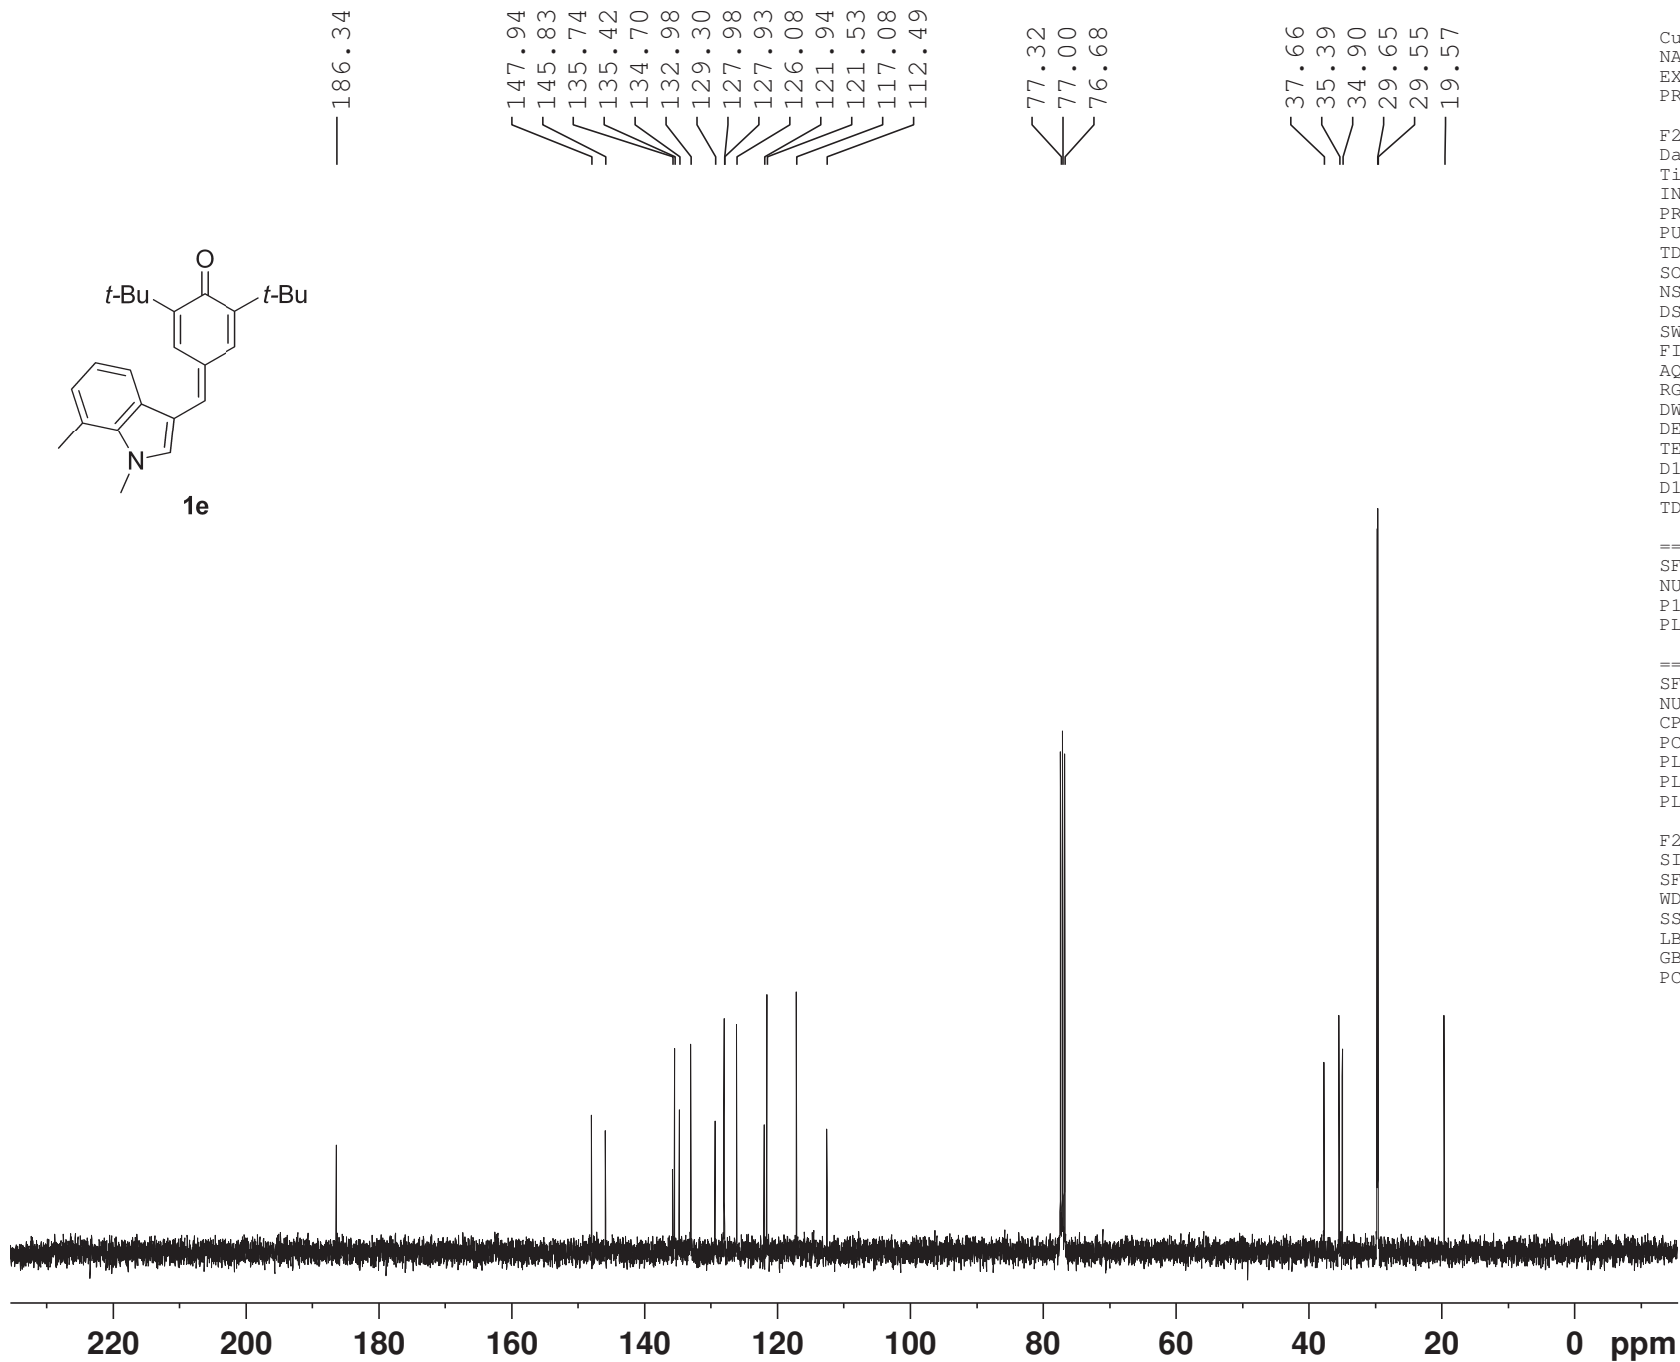

S44

Current Data Parameters  
 NAME 7-Me  
 EXPNO 11  
 PROCNO 1

F2 - Acquisition Parameters  
 Date\_ 20180810  
 Time 8.32  
 INSTRUM spect  
 PROBHD 5 mm PABBO BB/  
 PULPROG zgpg30  
 TD 65536  
 SOLVENT CDC13  
 NS 64  
 DS 2  
 SWH 25252.525 Hz  
 FIDRES 0.385323 Hz  
 AQ 1.2976128 sec  
 RG 2050  
 DW 19.800 usec  
 DE 6.50 usec  
 TE 295.3 K  
 D1 2.00000000 sec  
 D11 0.03000000 sec  
 TDO 1

==== CHANNEL f1 =====  
 SFO1 100.6238364 MHz  
 NUC1 13C  
 P1 15.50 usec  
 PLW1 25.00000000 W

==== CHANNEL f2 =====  
 SFO2 400.1316005 MHz  
 NUC2 1H  
 CPDPRG[2] waltz16  
 PCPD2 80.00 usec  
 PLW2 19.50000000 W  
 PLW12 0.51492000 W  
 PLW13 0.32955000 W

F2 - Processing parameters  
 SI 32768  
 SF 100.6127733 MHz  
 WDW EM  
 SSB 0  
 LB 1.00 Hz  
 GB 0  
 PC 1.40

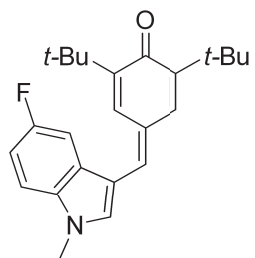

7.657  
7.652  
7.476  
7.434  
7.428  
7.411  
7.405  
7.298  
7.288  
7.276  
7.265  
7.253  
7.236  
7.088  
7.083  
7.067  
7.061  
7.045  
7.039

3.879

1.368  
1.361

0.000

Current Data Parameters  
NAME 5-F  
EXPNO 10  
PROCNO 1

F2 - Acquisition Parameters  
Date\_ 20180608  
Time 8.25  
INSTRUM spect  
PROBHD 5 mm PABBO BB/  
PULPROG zg30  
TD 65536  
SOLVENT CDCl3  
NS 4  
DS 2  
SWH 8012.820 Hz  
FIDRES 0.122266 Hz  
AQ 4.0894465 sec  
RG 114  
DW 62.400 usec  
DE 6.50 usec  
TE 295.8 K  
D1 1.00000000 sec  
TD0 1

==== CHANNEL f1 =====  
SFO1 400.1324710 MHz  
NUC1 1H  
P1 12.40 usec  
PLW1 19.00000000 W

F2 - Processing parameters  
SI 65536  
SF 400.1300126 MHz  
WDW EM  
SSB 0  
LB 0.30 Hz  
GB 0  
PC 1.00

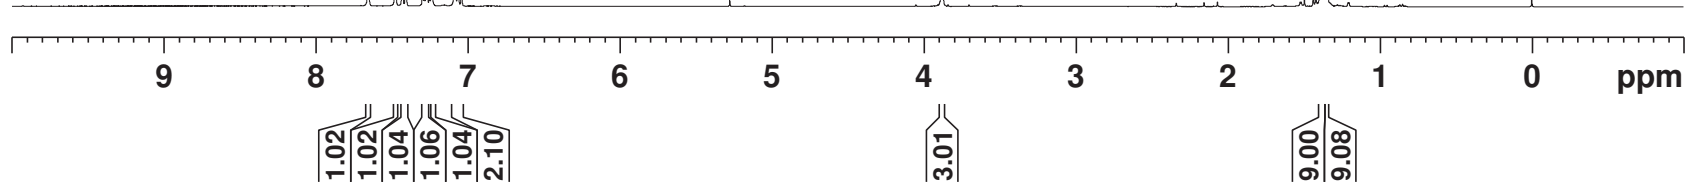

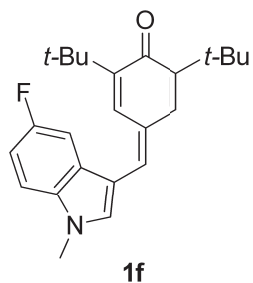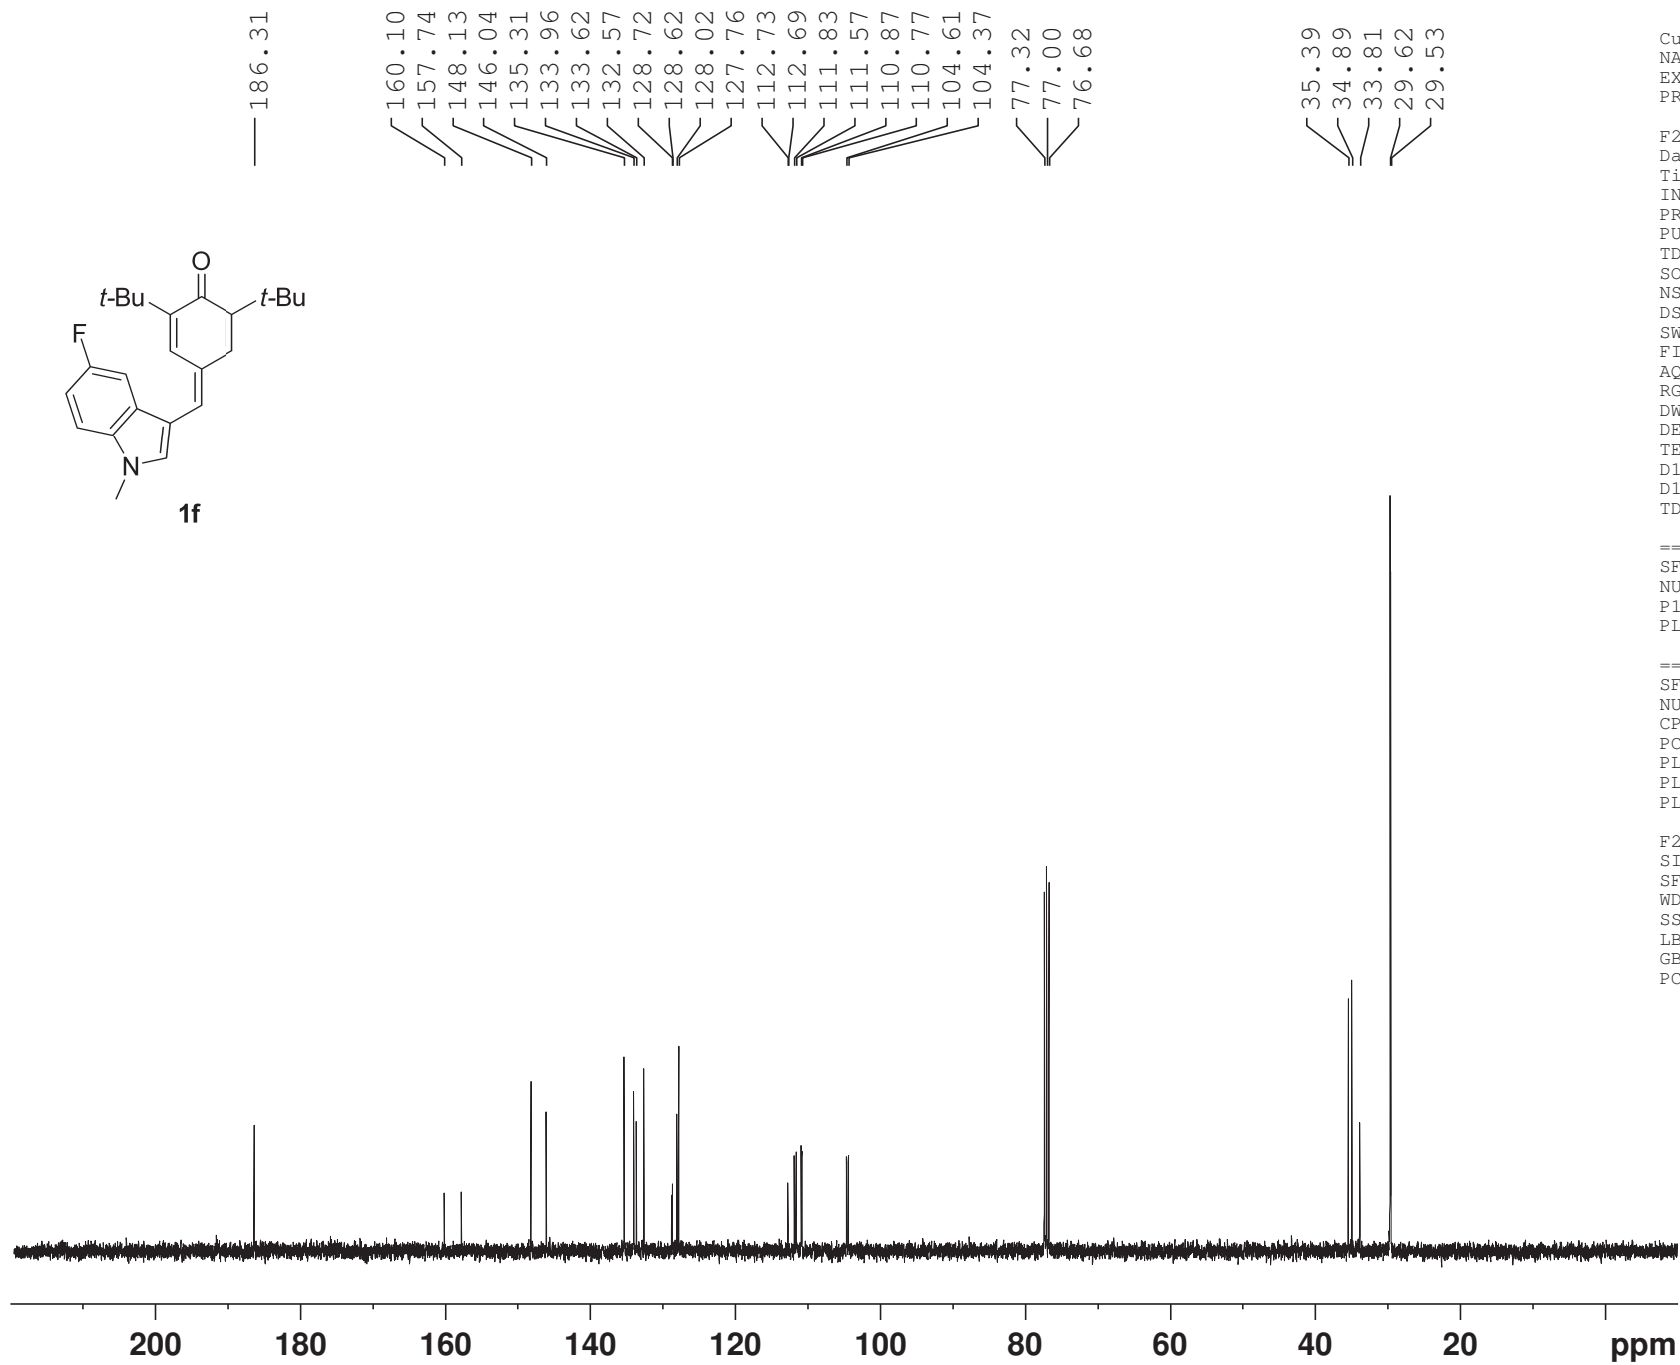

186.31

160.10  
157.74  
148.13  
146.04  
135.31  
133.96  
133.62  
132.57  
128.72  
128.62  
128.02  
127.76  
112.73  
112.69  
111.83  
111.57  
110.87  
110.77  
104.61  
104.37  
77.32  
77.00  
76.68

35.39  
34.89  
33.81  
29.62  
29.53

Current Data Parameters  
NAME 5-F  
EXPNO 11  
PROCNO 1

F2 - Acquisition Parameters  
Date\_ 20180608  
Time 8.27  
INSTRUM spect  
PROBHD 5 mm PABBO BB/  
PULPROG zgpg30  
TD 65536  
SOLVENT CDCl3  
NS 32  
DS 2  
SWH 24038.461 Hz  
FIDRES 0.366798 Hz  
AQ 1.3631488 sec  
RG 2050  
DW 20.800 usec  
DE 6.50 usec  
TE 296.4 K  
D1 2.00000000 sec  
D11 0.03000000 sec  
TDO 1

==== CHANNEL f1 =====  
SFO1 100.6228298 MHz  
NUC1 13C  
P1 15.50 usec  
PLW1 25.00000000 W

==== CHANNEL f2 =====  
SFO2 400.1316005 MHz  
NUC2 1H  
CPDPRG[2] waltz16  
PCPD2 80.00 usec  
PLW2 19.50000000 W  
PLW12 0.51492000 W  
PLW13 0.32955000 W

F2 - Processing parameters  
SI 32768  
SF 100.6127750 MHz  
WDW EM  
SSB 0  
LB 1.00 Hz  
GB 0  
PC 1.40

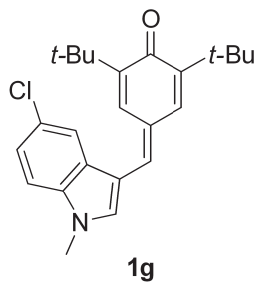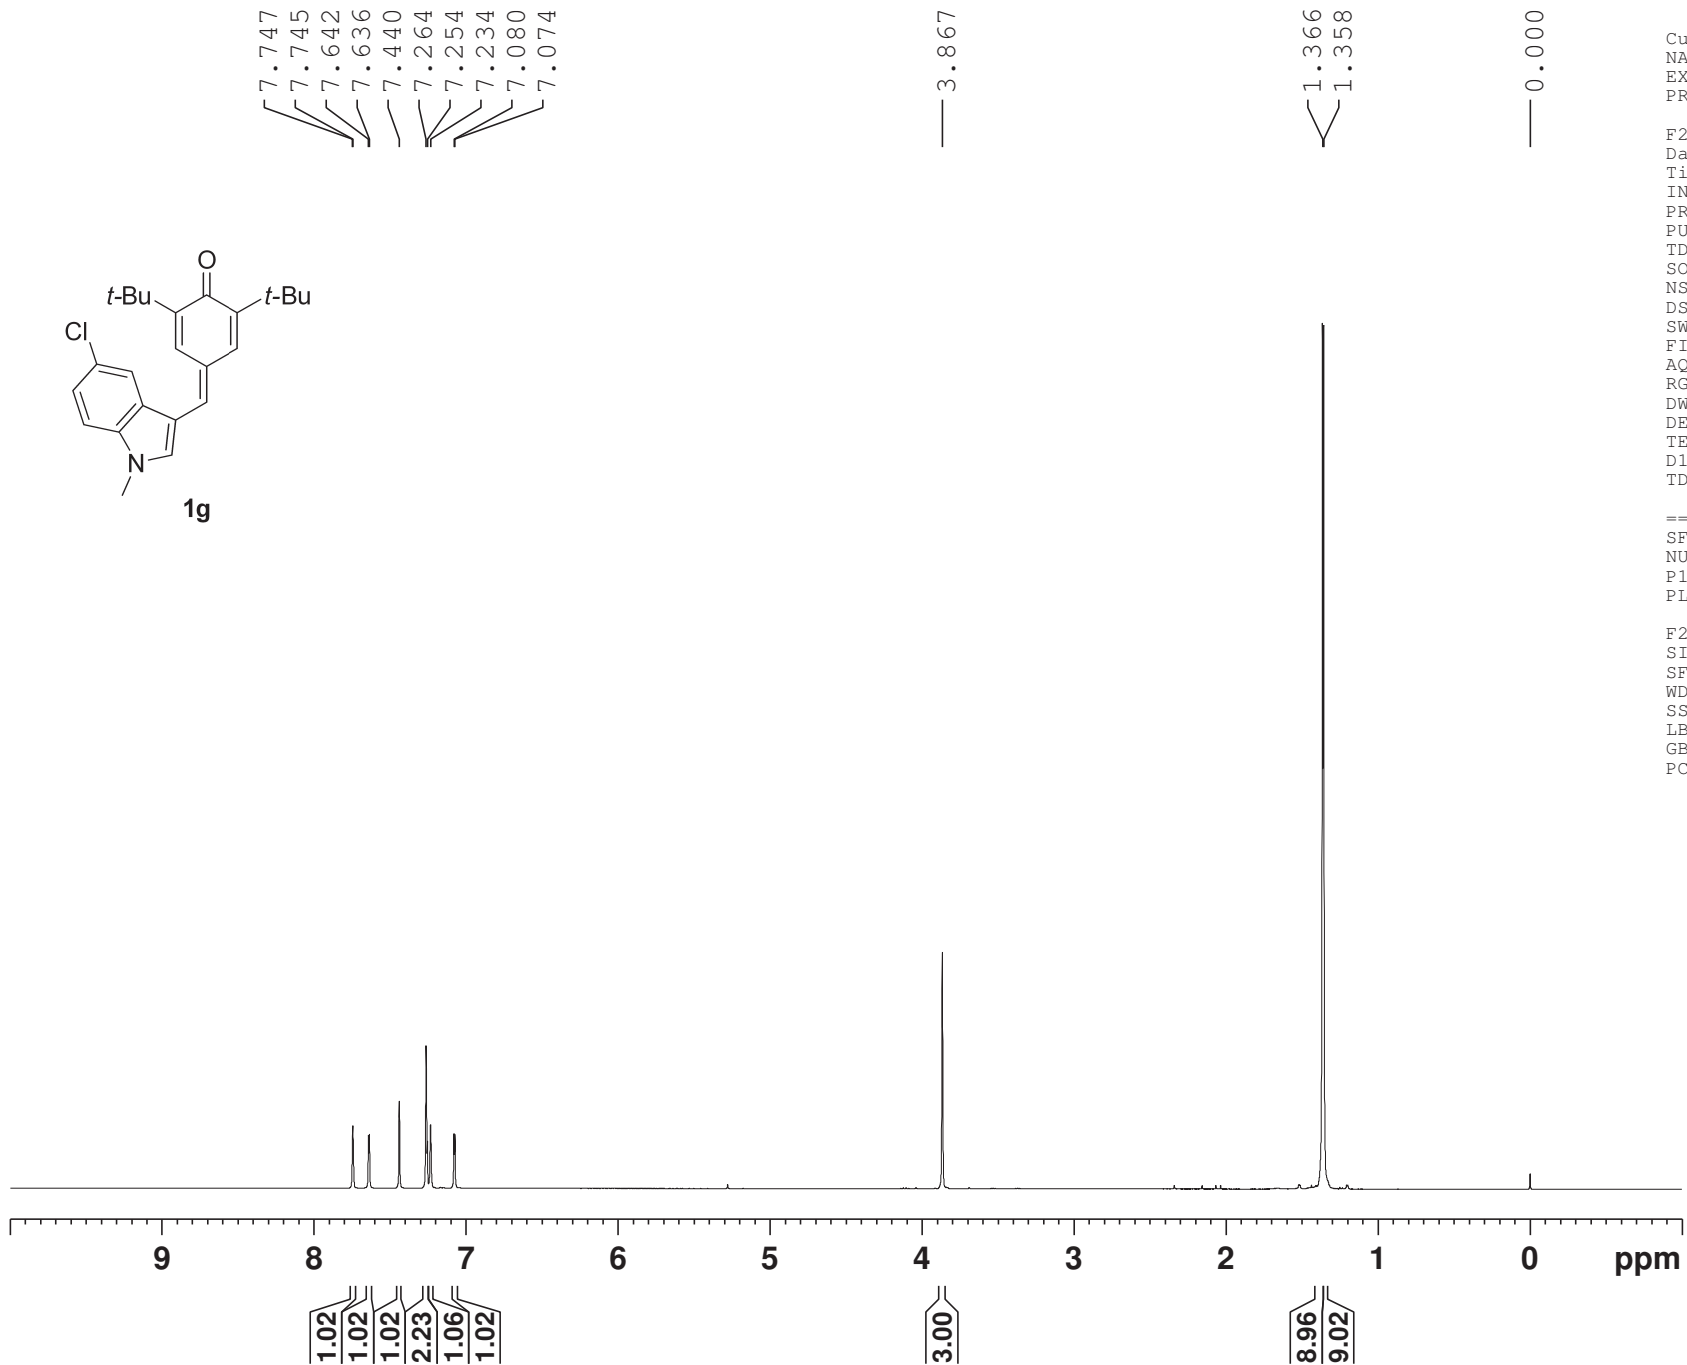

Current Data Parameters  
 NAME 5-C1  
 EXPNO 11  
 PROCNO 1

F2 - Acquisition Parameters  
 Date\_ 20180608  
 Time 8.11  
 INSTRUM spect  
 PROBHD 5 mm PABBO BB/  
 PULPROG zg30  
 TD 65536  
 SOLVENT CDCl3  
 NS 4  
 DS 2  
 SWH 8012.820 Hz  
 FIDRES 0.122266 Hz  
 AQ 4.0894465 sec  
 RG 144  
 DW 62.400 usec  
 DE 6.50 usec  
 TE 295.8 K  
 D1 1.00000000 sec  
 TD0 1

==== CHANNEL f1 =====  
 SFO1 400.1324710 MHz  
 NUC1 1H  
 P1 12.40 usec  
 PLW1 19.00000000 W

F2 - Processing parameters  
 SI 65536  
 SF 400.1300118 MHz  
 WDW EM  
 SSB 0  
 LB 0.30 Hz  
 GB 0  
 PC 1.00



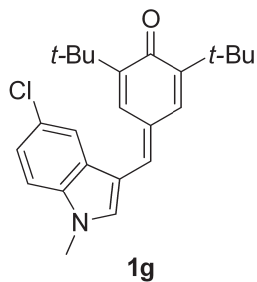

— 186.34

148.21  
146.18  
135.44  
135.27  
133.64  
132.21  
128.99  
128.37  
127.77  
127.28  
123.59  
118.94  
112.40  
110.97

77.32  
77.00  
76.68

35.41  
34.91  
33.71  
29.62  
29.54

Current Data Parameters  
NAME 5-C1  
EXPNO 12  
PROCNO 1

F2 - Acquisition Parameters  
Date\_ 20180608  
Time 8.15  
INSTRUM spect  
PROBHD 5 mm PABBO BB/  
PULPROG zgpg30  
TD 65536  
SOLVENT CDCl3  
NS 64  
DS 2  
SWH 24038.461 Hz  
FIDRES 0.366798 Hz  
AQ 1.3631488 sec  
RG 2050  
DW 20.800 usec  
DE 6.50 usec  
TE 296.5 K  
D1 2.00000000 sec  
D11 0.03000000 sec  
TDO 1

==== CHANNEL f1 =====  
SFO1 100.6228298 MHz  
NUC1 13C  
P1 15.50 usec  
PLW1 25.00000000 W

==== CHANNEL f2 =====  
SFO2 400.1316005 MHz  
NUC2 1H  
CPDPRG[2] waltz16  
PCPD2 80.00 usec  
PLW2 19.50000000 W  
PLW12 0.51492000 W  
PLW13 0.32955000 W

F2 - Processing parameters  
SI 32768  
SF 100.6127744 MHz  
WDW EM  
SSB 0  
LB 1.00 Hz  
GB 0  
PC 1.40

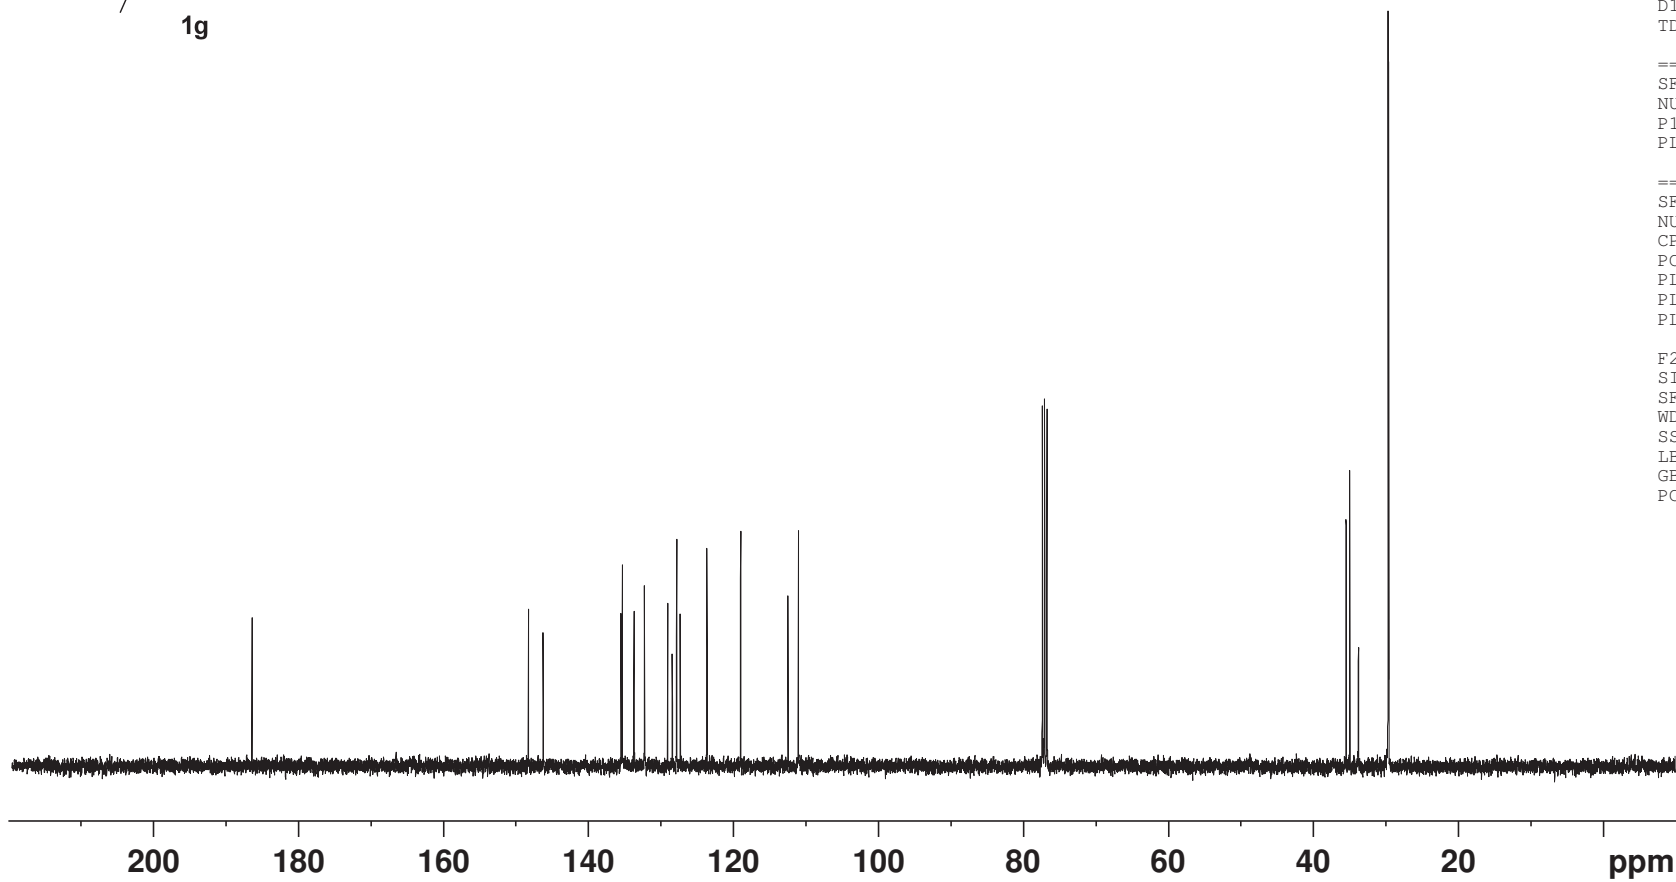

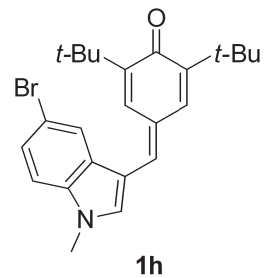

7.893  
7.890  
7.633  
7.628  
7.405  
7.386  
7.382  
7.364  
7.360  
7.210  
7.187  
7.072  
7.067

3.846

1.366  
1.359

0.000

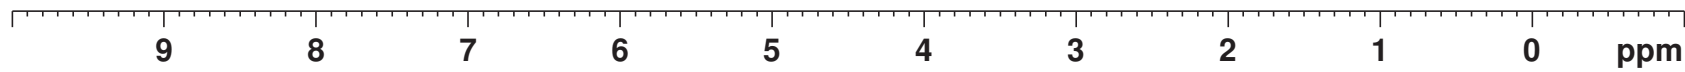

1.01  
1.02  
1.02  
1.05  
2.05  
1.03

3.00

9.02  
9.06

```

Current Data Parameters
NAME          5-Br
EXPNO         11
PROCNO        1

F2 - Acquisition Parameters
Date_         20180714
Time          1.29
INSTRUM       spect
PROBHD        5 mm PABBO BB/
PULPROG       zg30
TD            65536
SOLVENT       CDC13
NS            4
DS            2
SWH           8012.820 Hz
FIDRES        0.122266 Hz
AQ            4.089465 sec
RG            101
DW            62.400 usec
DE            6.50 usec
TE            297.1 K
D1            1.00000000 sec
TD0           1

===== CHANNEL f1 =====
SFO1          400.1324710 MHz
NUC1           1H
P1            12.40 usec
PLW1          19.00000000 W

F2 - Processing parameters
SI            65536
SF            400.1300119 MHz
WDW           EM
SSB           0
LB            0.30 Hz
GB            0
PC            1.00
  
```

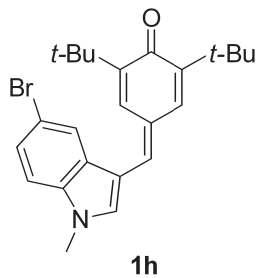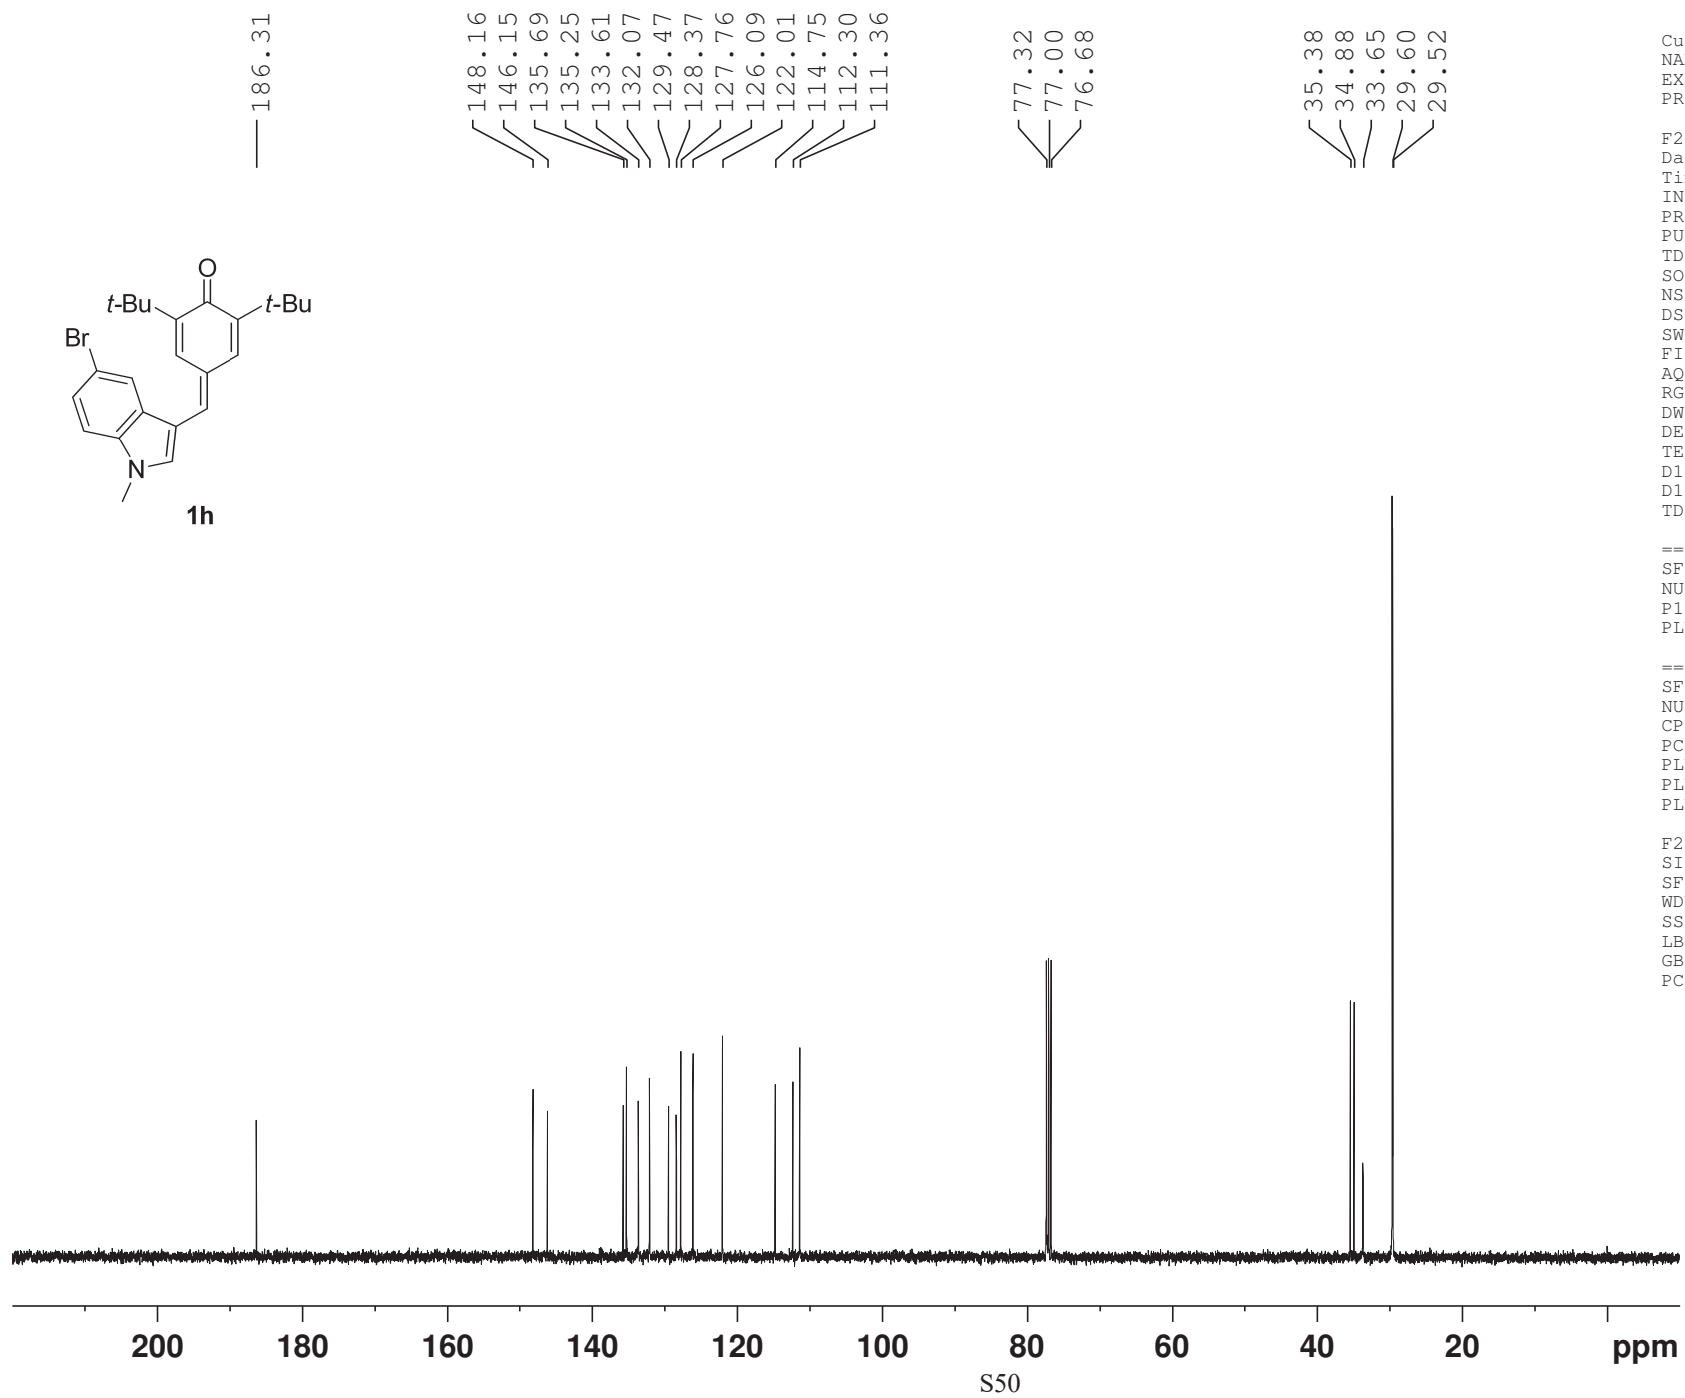

— 186.31

148.16  
146.15  
135.69  
135.25  
133.61  
132.07  
129.47  
128.37  
127.76  
126.09  
122.01  
114.75  
112.30  
111.36

77.32  
77.00  
76.68

35.38  
34.88  
33.65  
29.60  
29.52

```

Current Data Parameters
NAME          5-Br
EXPNO         12
PROCNO        1

F2 - Acquisition Parameters
Date_         20180714
Time          1.33
INSTRUM       spect
PROBHD        5 mm PABBO BB/
PULPROG       zgpg30
TD            65536
SOLVENT       CDCl3
NS            64
DS            2
SWH           25252.525 Hz
FIDRES        0.385323 Hz
AQ            1.2976128 sec
RG            2050
DW            19.800 usec
DE            6.50 usec
TE            297.8 K
D1            2.00000000 sec
D11           0.03000000 sec
TDO           1

===== CHANNEL f1 =====
SFO1          100.6238364 MHz
NUC1           13C
P1             15.50 usec
PLW1           25.00000000 W

===== CHANNEL f2 =====
SFO2          400.1316005 MHz
NUC2            1H
CPDPRG[2]     waltz16
PCPD2          80.00 usec
PLW2           19.50000000 W
PLW12          0.51492000 W
PLW13          0.32955000 W

F2 - Processing parameters
SI             32768
SF            100.6127776 MHz
WDW            EM
SSB            0
LB             1.00 Hz
GB            0
PC             1.40
  
```

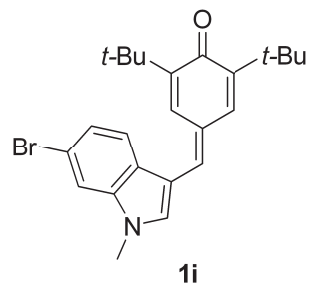

7.643  
7.636  
7.614  
7.521  
7.517  
7.405  
7.362  
7.357  
7.340  
7.336  
7.271  
7.257  
7.087  
7.081

3.849

1.362  
1.356

0.000



2.02  
1.00  
1.00  
1.02  
1.01  
1.01

3.00

9.08  
9.02

```

Current Data Parameters
NAME          6-Br
EXPNO         14
PROCNO        1

F2 - Acquisition Parameters
Date_         20210811
Time          9.11
INSTRUM       spect
PROBHD        5 mm PABBO BB/
PULPROG       zg30
TD            65536
SOLVENT       CDC13
NS            4
DS            2
SWH           8012.820 Hz
FIDRES        0.122266 Hz
AQ            4.089465 sec
RG            80.6
DW            62.400 usec
DE            6.50 usec
TE            293.2 K
D1            1.00000000 sec
TD0           1

===== CHANNEL f1 =====
SFO1          400.1324710 MHz
NUC1           1H
P1            12.40 usec
PLW1          19.00000000 W

F2 - Processing parameters
SI            65536
SF            400.1300120 MHz
WDW           EM
SSB           0
LB            0.30 Hz
GB            0
PC            1.00
  
```

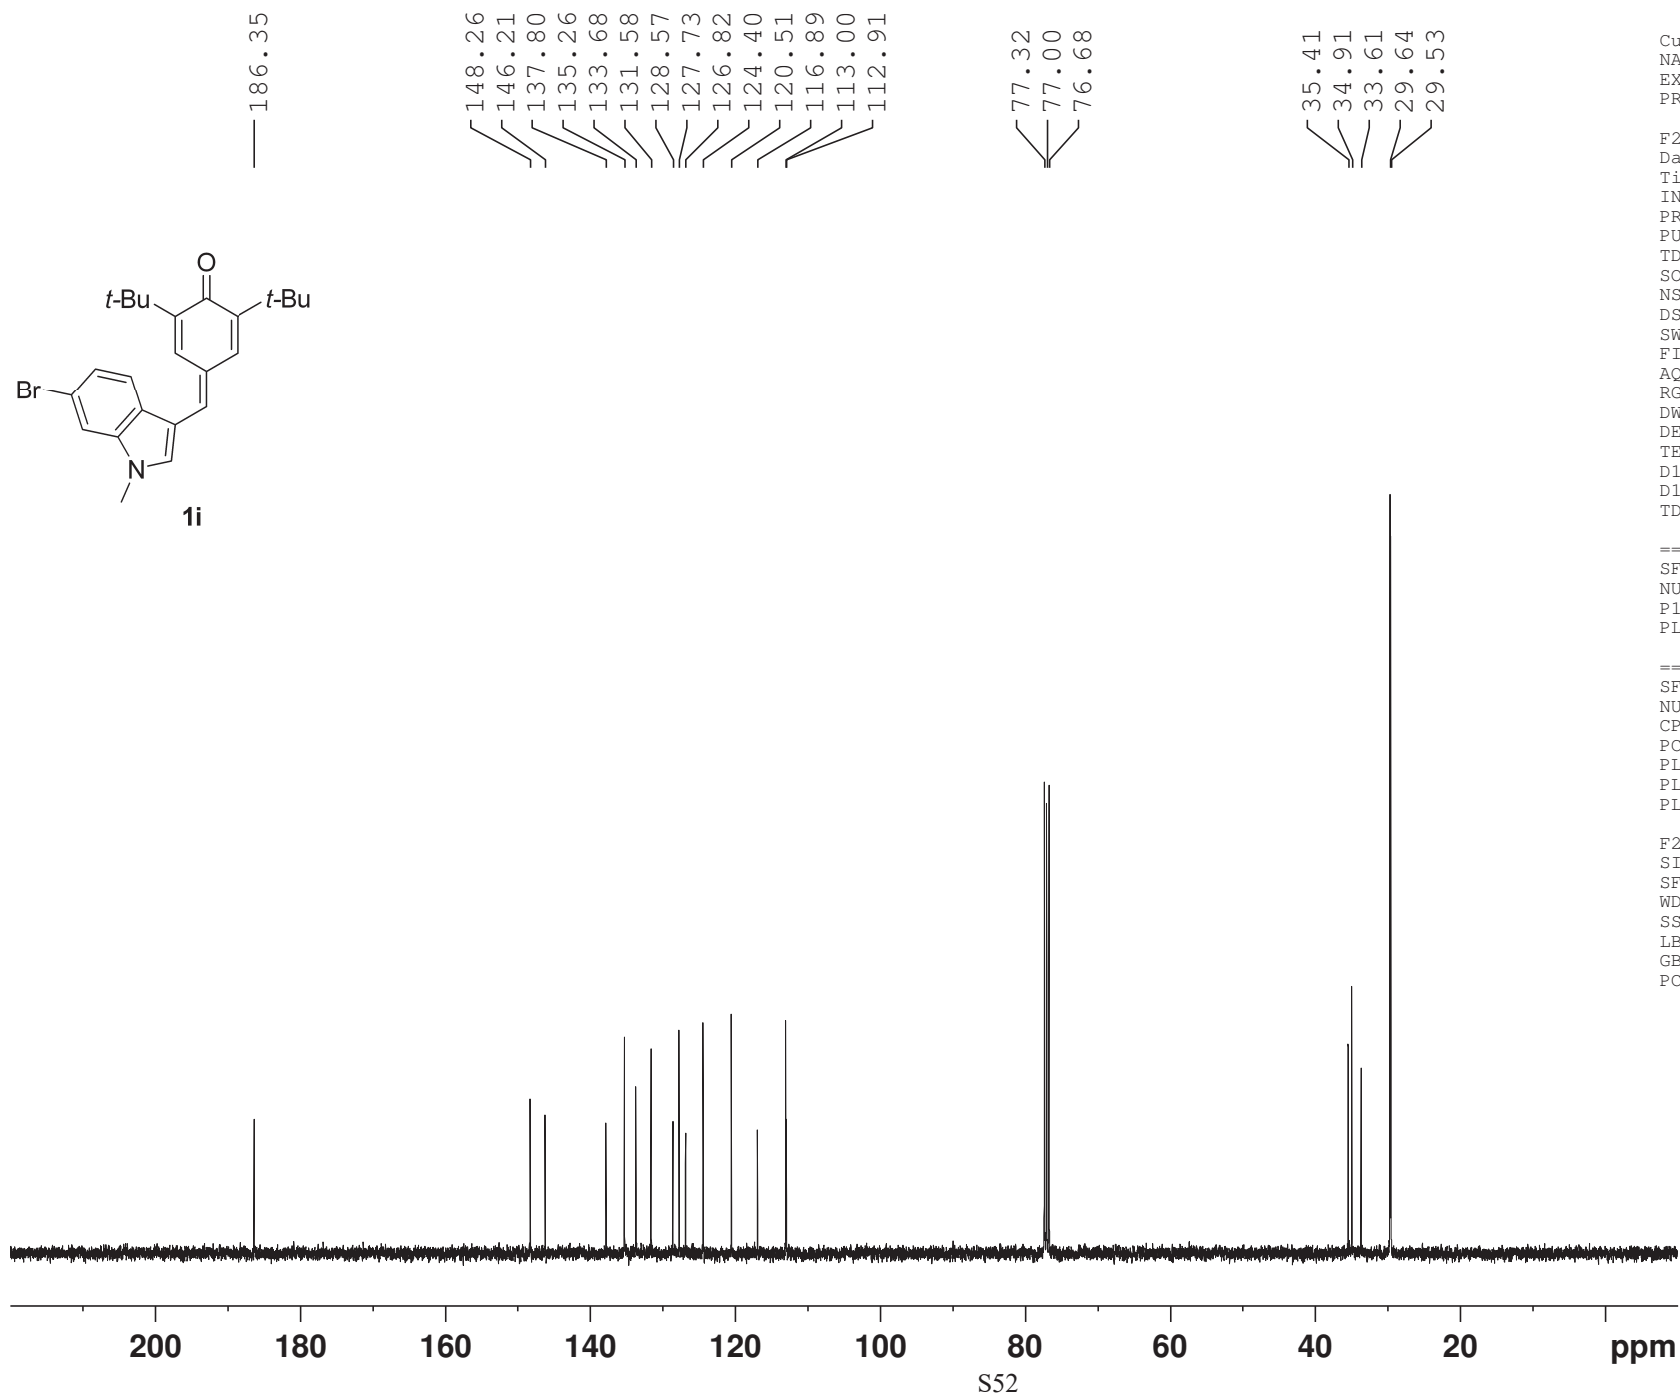

Current Data Parameters  
 NAME 6-Br  
 EXPNO 15  
 PROCNO 1

F2 - Acquisition Parameters  
 Date\_ 20210811  
 Time 9.18  
 INSTRUM spect  
 PROBHD 5 mm PABBO BB/  
 PULPROG zgpg30  
 TD 65536  
 SOLVENT CDCl3  
 NS 128  
 DS 2  
 SWH 25252.525 Hz  
 FIDRES 0.385323 Hz  
 AQ 1.2976128 sec  
 RG 2050  
 DW 19.800 usec  
 DE 6.50 usec  
 TE 294.2 K  
 D1 2.00000000 sec  
 D11 0.03000000 sec  
 TDO 1

==== CHANNEL f1 =====  
 SFO1 100.6228303 MHz  
 NUC1 13C  
 P1 15.50 usec  
 PLW1 25.00000000 W

==== CHANNEL f2 =====  
 SFO2 400.1316005 MHz  
 NUC2 1H  
 CPDPRG[2] waltz16  
 PCPD2 80.00 usec  
 PLW2 19.50000000 W  
 PLW12 0.45497999 W  
 PLW13 0.29119000 W

F2 - Processing parameters  
 SI 32768  
 SF 100.6127750 MHz  
 WDW EM  
 SSB 0  
 LB 1.00 Hz  
 GB 0  
 PC 1.40

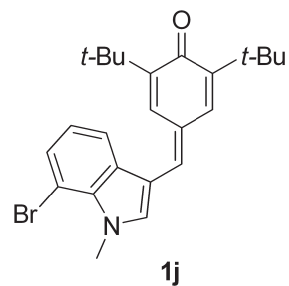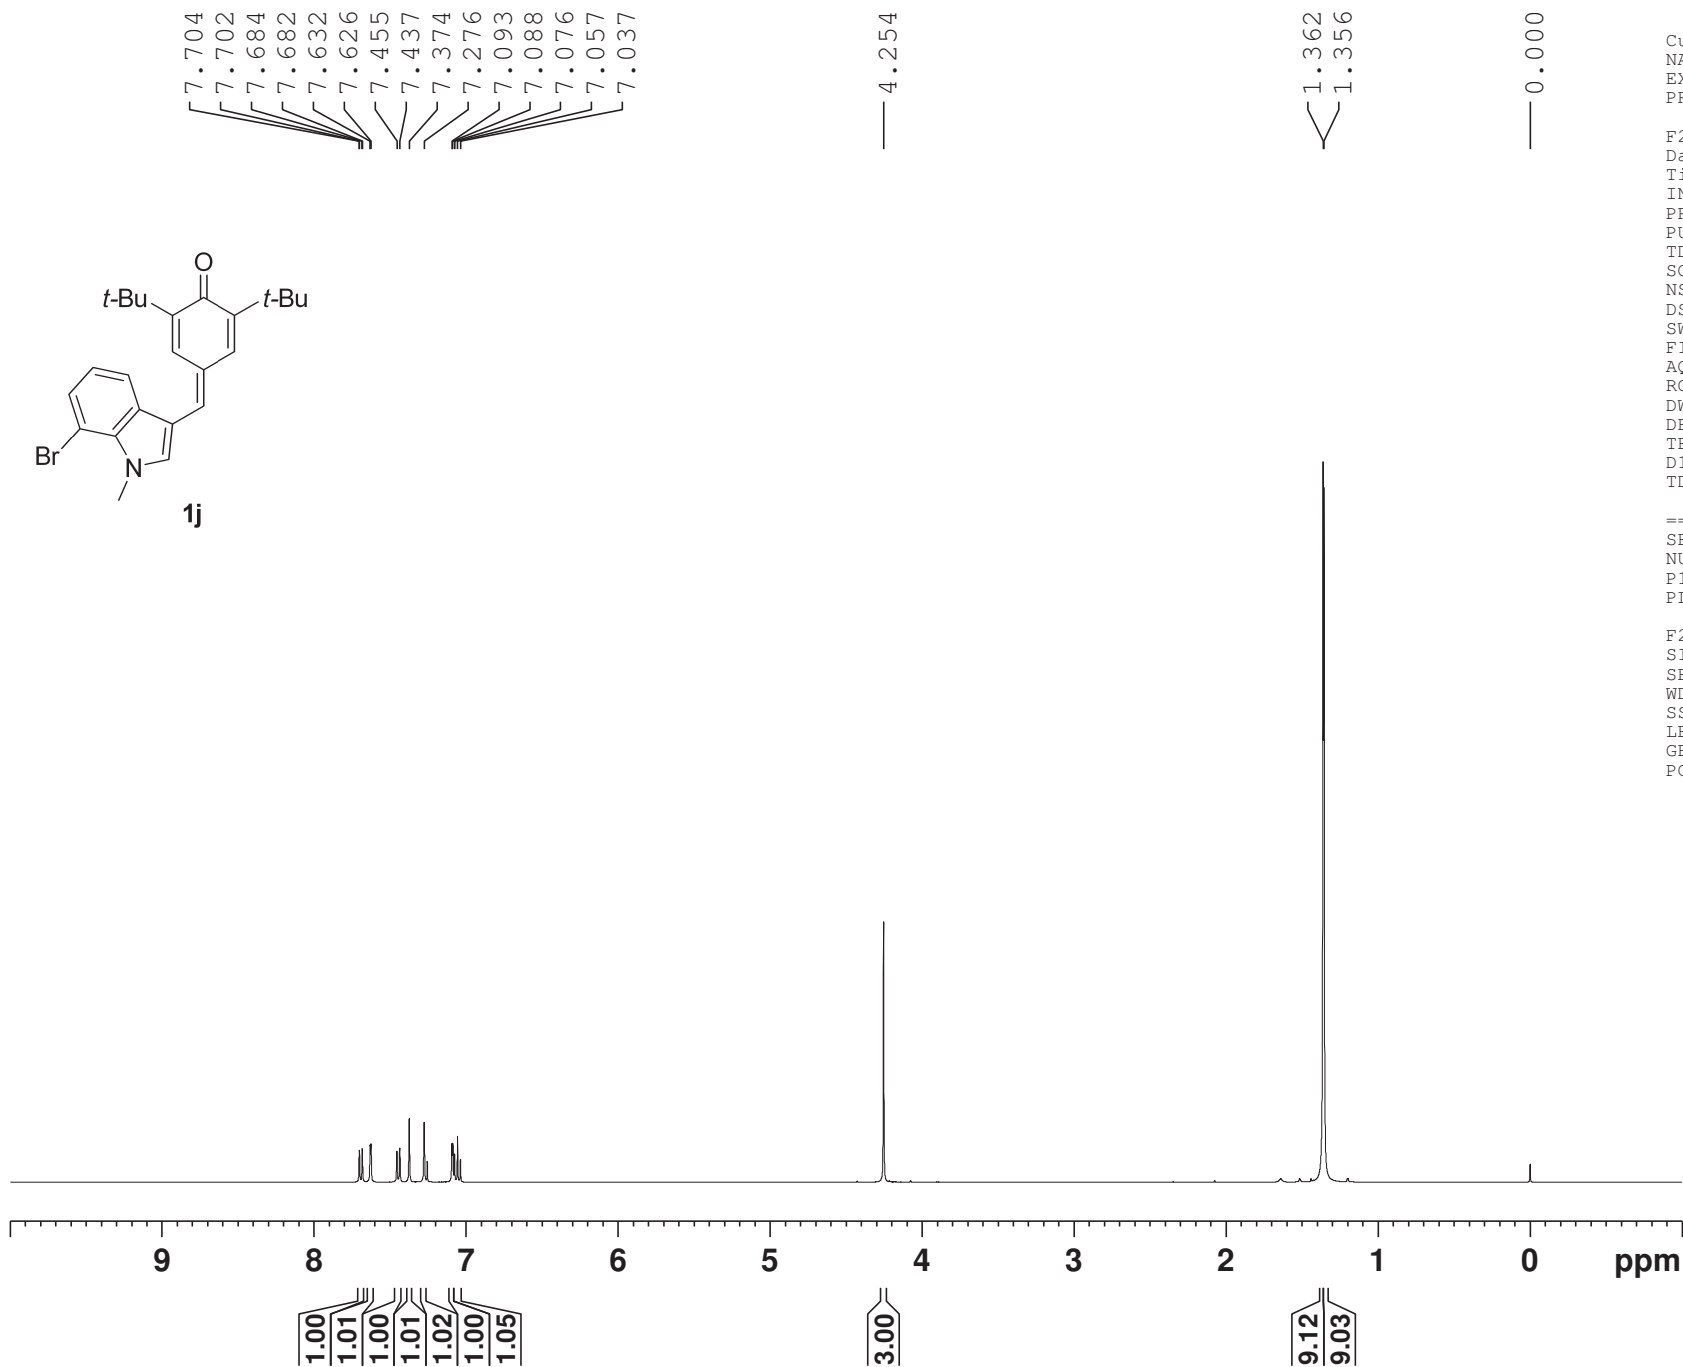

Current Data Parameters  
 NAME 7-Br  
 EXPNO 18  
 PROCNO 1

F2 - Acquisition Parameters  
 Date\_ 20210811  
 Time 9.24  
 INSTRUM spect  
 PROBHD 5 mm PABBO BB/  
 PULPROG zg30  
 TD 65536  
 SOLVENT CDCl3  
 NS 4  
 DS 2  
 SWH 8012.820 Hz  
 FIDRES 0.122266 Hz  
 AQ 4.089465 sec  
 RG 101  
 DW 62.400 usec  
 DE 6.50 usec  
 TE 293.2 K  
 D1 1.00000000 sec  
 TD0 1

==== CHANNEL f1 =====  
 SFO1 400.1324710 MHz  
 NUC1 1H  
 P1 12.40 usec  
 PLW1 19.00000000 W

F2 - Processing parameters  
 SI 65536  
 SF 400.1300126 MHz  
 WDW EM  
 SSB 0  
 LB 0.30 Hz  
 GB 0  
 PC 1.00

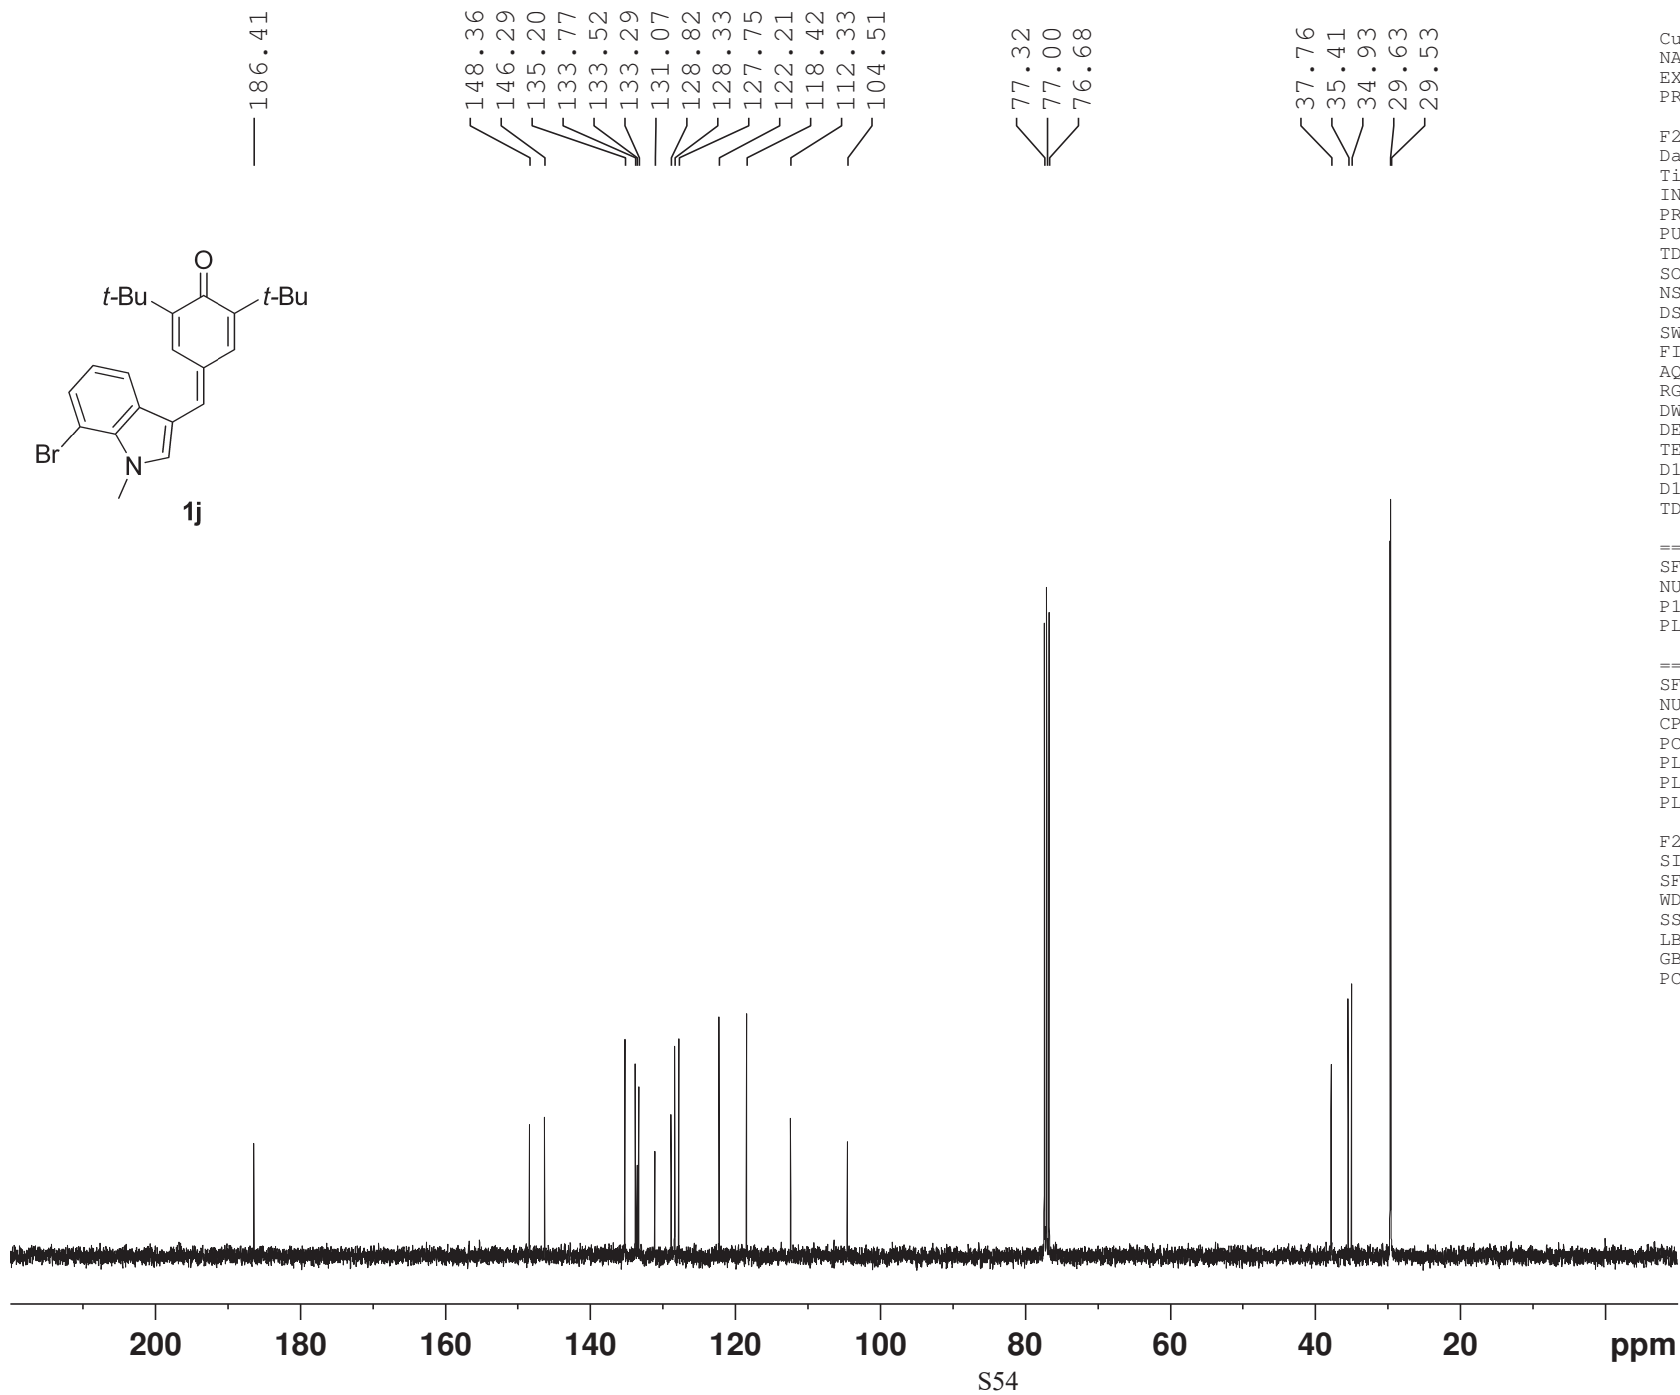

Current Data Parameters  
 NAME 7-Br  
 EXPNO 19  
 PROCNO 1

F2 - Acquisition Parameters  
 Date\_ 20210811  
 Time 9.32  
 INSTRUM spect  
 PROBHD 5 mm PABBO BB/  
 PULPROG zgpg30  
 TD 65536  
 SOLVENT CDCl3  
 NS 128  
 DS 2  
 SWH 25252.525 Hz  
 FIDRES 0.385323 Hz  
 AQ 1.2976128 sec  
 RG 2050  
 DW 19.800 usec  
 DE 6.50 usec  
 TE 294.3 K  
 D1 2.00000000 sec  
 D11 0.03000000 sec  
 TDO 1

===== CHANNEL f1 =====  
 SFO1 100.6238364 MHz  
 NUC1 13C  
 P1 15.50 usec  
 PLW1 25.00000000 W

===== CHANNEL f2 =====  
 SFO2 400.1316005 MHz  
 NUC2 1H  
 CPDPRG[2] waltz16  
 PCPD2 80.00 usec  
 PLW2 19.50000000 W  
 PLW12 0.45497999 W  
 PLW13 0.29119000 W

F2 - Processing parameters  
 SI 32768  
 SF 100.6127737 MHz  
 WDW EM  
 SSB 0  
 LB 1.00 Hz  
 GB 0  
 PC 1.40

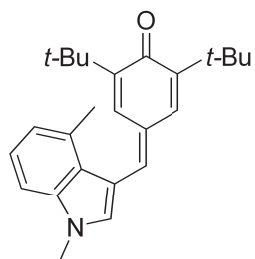

1k

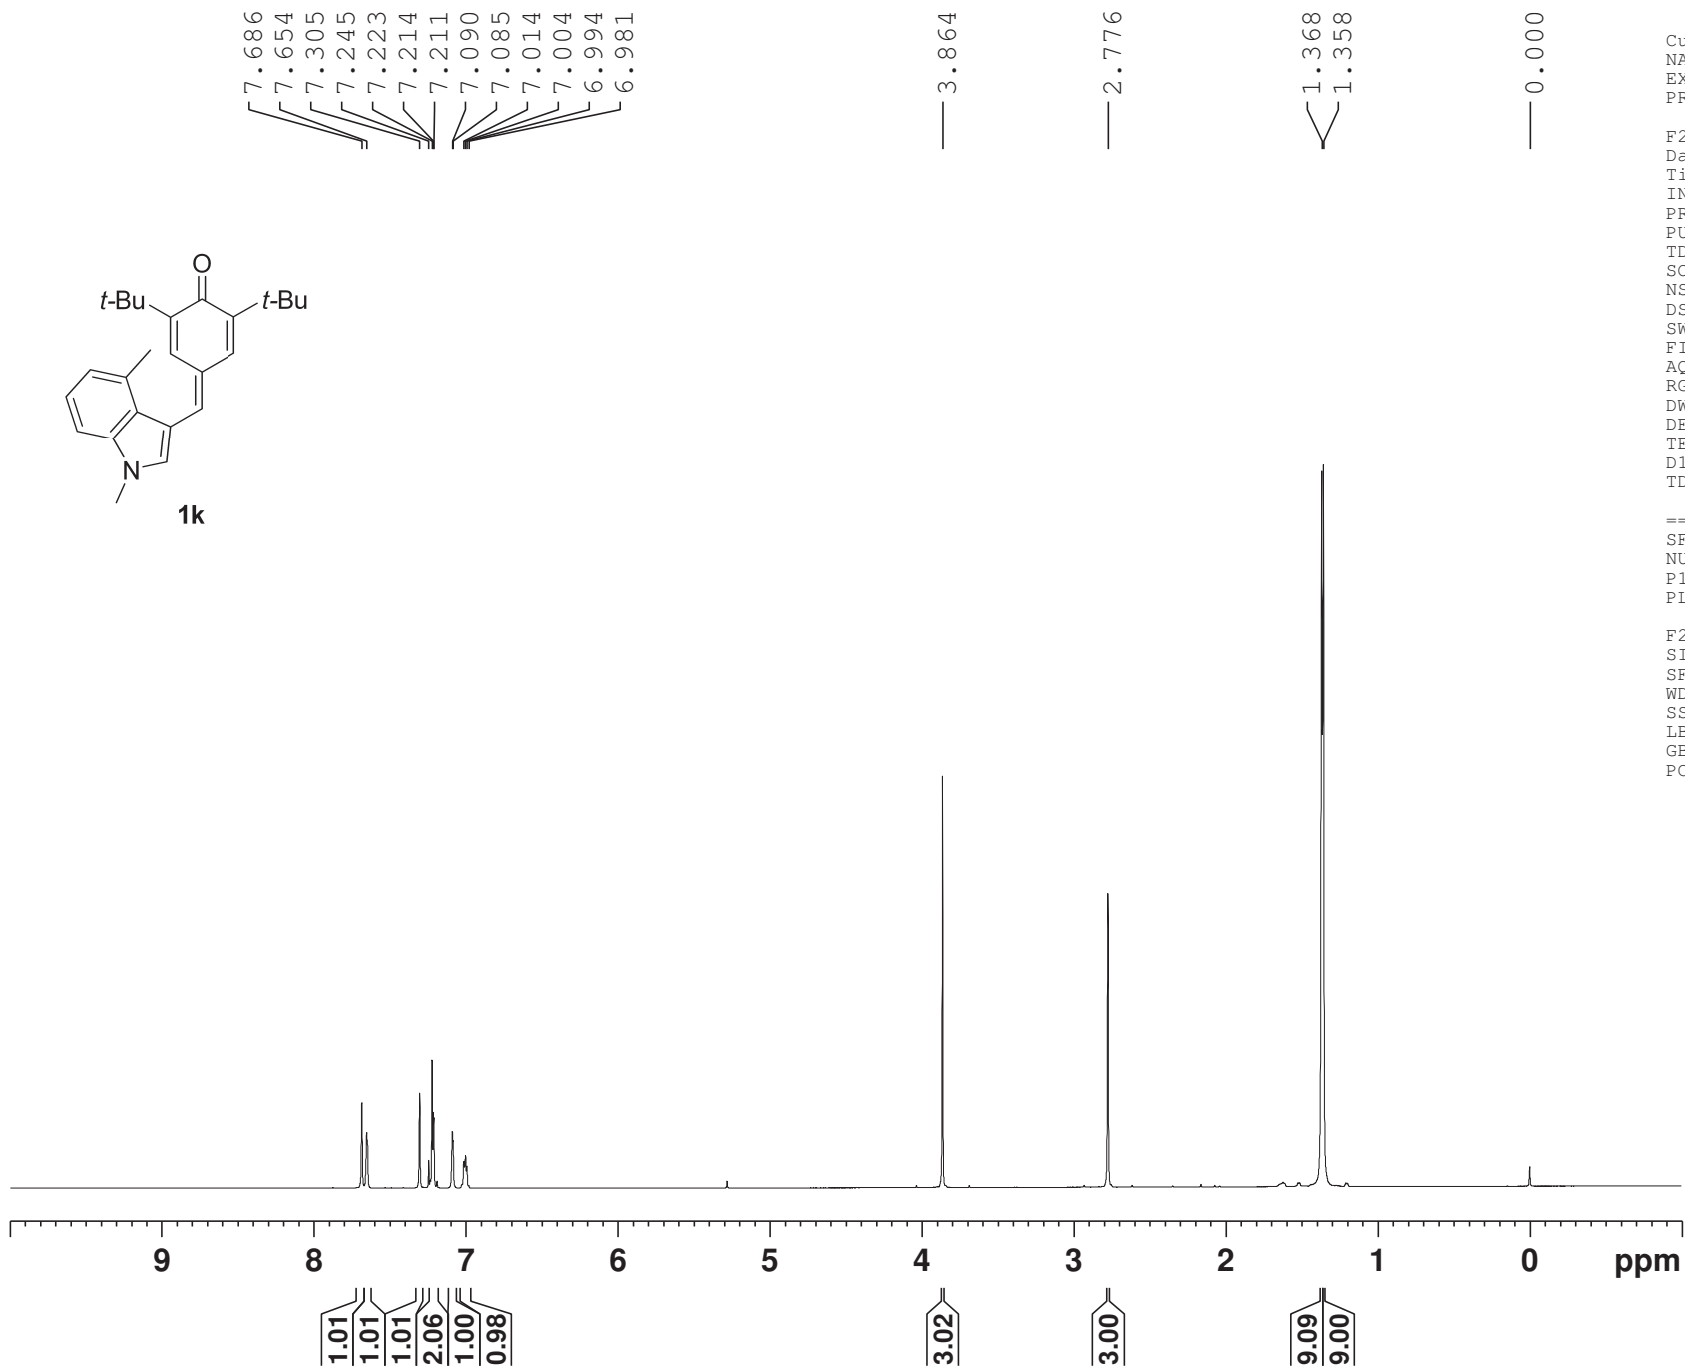

7.686  
7.654  
7.305  
7.245  
7.223  
7.214  
7.211  
7.090  
7.085  
7.014  
7.004  
6.994  
6.981

3.864

2.776

1.368  
1.358

0.000

Current Data Parameters  
NAME 4-Me  
EXPNO 10  
PROCNO 1

F2 - Acquisition Parameters  
Date\_ 20180810  
Time 8.59  
INSTRUM spect  
PROBHD 5 mm PABBO BB/  
PULPROG zg30  
TD 65536  
SOLVENT CDCl3  
NS 4  
DS 2  
SWH 8012.820 Hz  
FIDRES 0.122266 Hz  
AQ 4.089465 sec  
RG 101  
DW 62.400 usec  
DE 6.50 usec  
TE 293.9 K  
D1 1.00000000 sec  
TD0 1

==== CHANNEL f1 =====  
SFO1 400.1324710 MHz  
NUC1 1H  
P1 12.40 usec  
PLW1 19.00000000 W

F2 - Processing parameters  
SI 65536  
SF 400.1300153 MHz  
WDW EM  
SSB 0  
LB 0.30 Hz  
GB 0  
PC 1.00



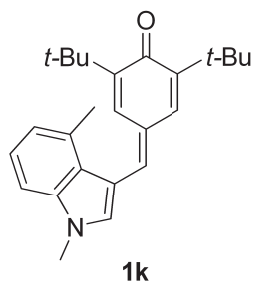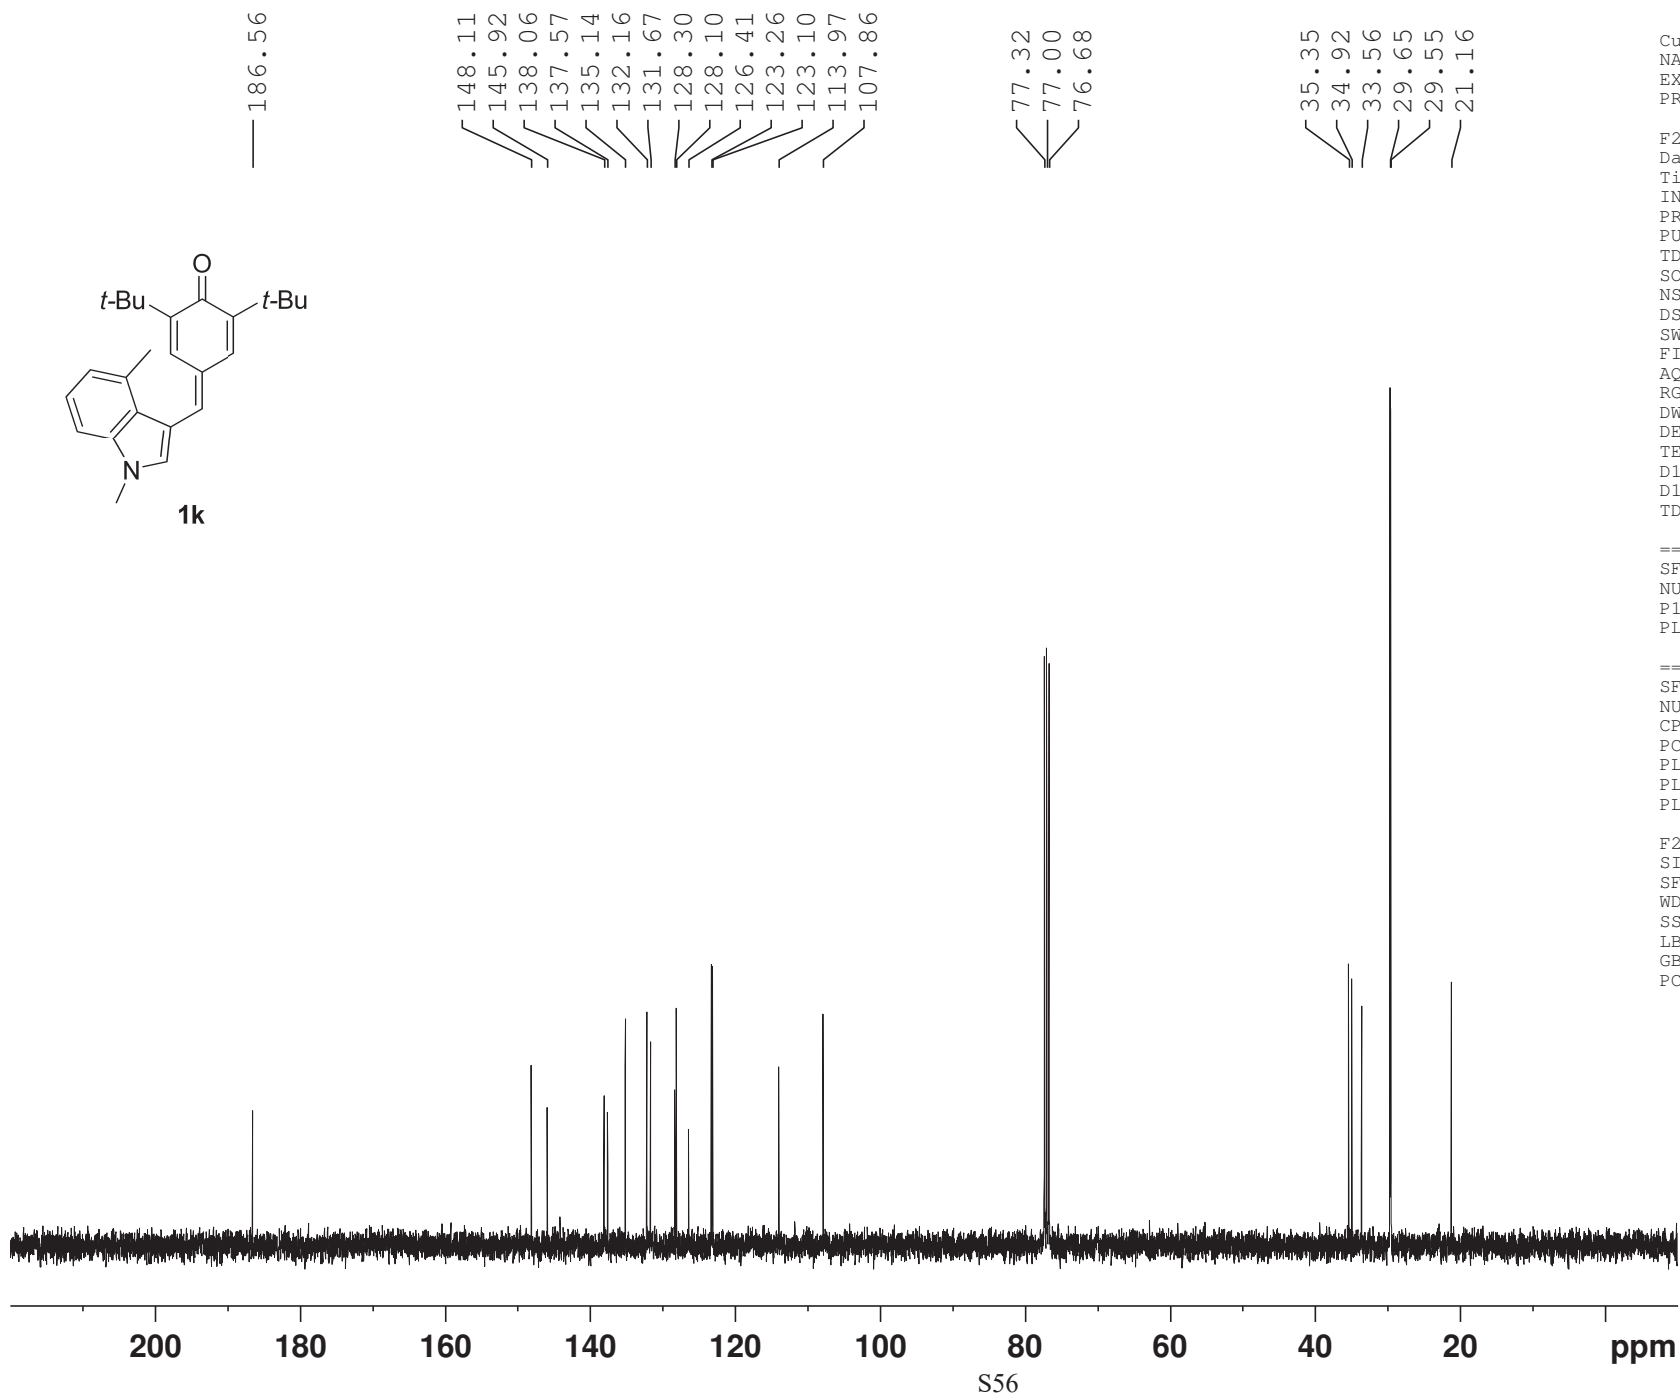

Current Data Parameters  
 NAME 4-Me  
 EXPNO 11  
 PROCNO 1

F2 - Acquisition Parameters  
 Date\_ 20180810  
 Time 9.02  
 INSTRUM spect  
 PROBHD 5 mm PABBO BB/  
 PULPROG zgpg30  
 TD 65536  
 SOLVENT CDCl3  
 NS 50  
 DS 2  
 SWH 25252.525 Hz  
 FIDRES 0.385323 Hz  
 AQ 1.2976128 sec  
 RG 2050  
 DW 19.800 usec  
 DE 6.50 usec  
 TE 295.1 K  
 D1 2.00000000 sec  
 D11 0.03000000 sec  
 TDO 1

==== CHANNEL f1 =====  
 SFO1 100.6238364 MHz  
 NUC1 13C  
 P1 15.50 usec  
 PLW1 25.00000000 W

==== CHANNEL f2 =====  
 SFO2 400.1316005 MHz  
 NUC2 1H  
 CPDPRG[2] waltz16  
 PCPD2 80.00 usec  
 PLW2 19.50000000 W  
 PLW12 0.51492000 W  
 PLW13 0.32955000 W

F2 - Processing parameters  
 SI 32768  
 SF 100.6127734 MHz  
 WDW EM  
 SSB 0  
 LB 1.00 Hz  
 GB 0  
 PC 1.40

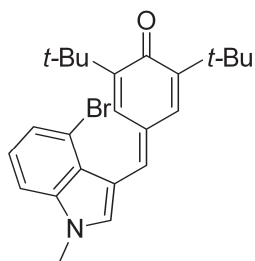

11

8.136  
7.605  
7.599  
7.406  
7.387  
7.331  
7.309  
7.159  
7.139  
7.120  
7.115

3.875

1.365  
1.349

0.000

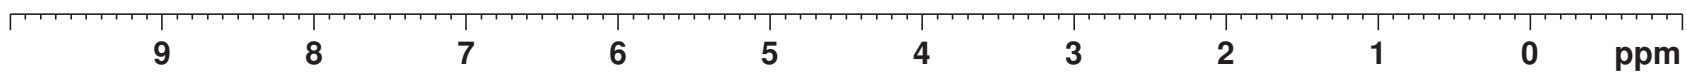

1.00  
1.00  
1.00  
2.07  
2.12

3.03

9.09  
9.01

Current Data Parameters  
NAME 4-Br  
EXPNO 10  
PROCNO 1

F2 - Acquisition Parameters  
Date\_ 20180810  
Time 8.50  
INSTRUM spect  
PROBHD 5 mm PABBO BB/  
PULPROG zg30  
TD 65536  
SOLVENT CDCl3  
NS 4  
DS 2  
SWH 8012.820 Hz  
FIDRES 0.122266 Hz  
AQ 4.089465 sec  
RG 80.6  
DW 62.400 usec  
DE 6.50 usec  
TE 293.9 K  
D1 1.00000000 sec  
TD0 1

==== CHANNEL f1 =====  
SFO1 400.1324710 MHz  
NUC1 1H  
P1 12.40 usec  
PLW1 19.00000000 W

F2 - Processing parameters  
SI 65536  
SF 400.1300120 MHz  
WDW EM  
SSB 0  
LB 0.30 Hz  
GB 0  
PC 1.00

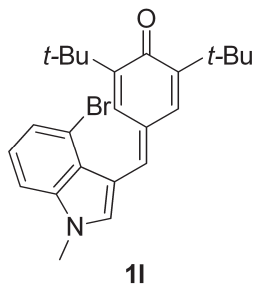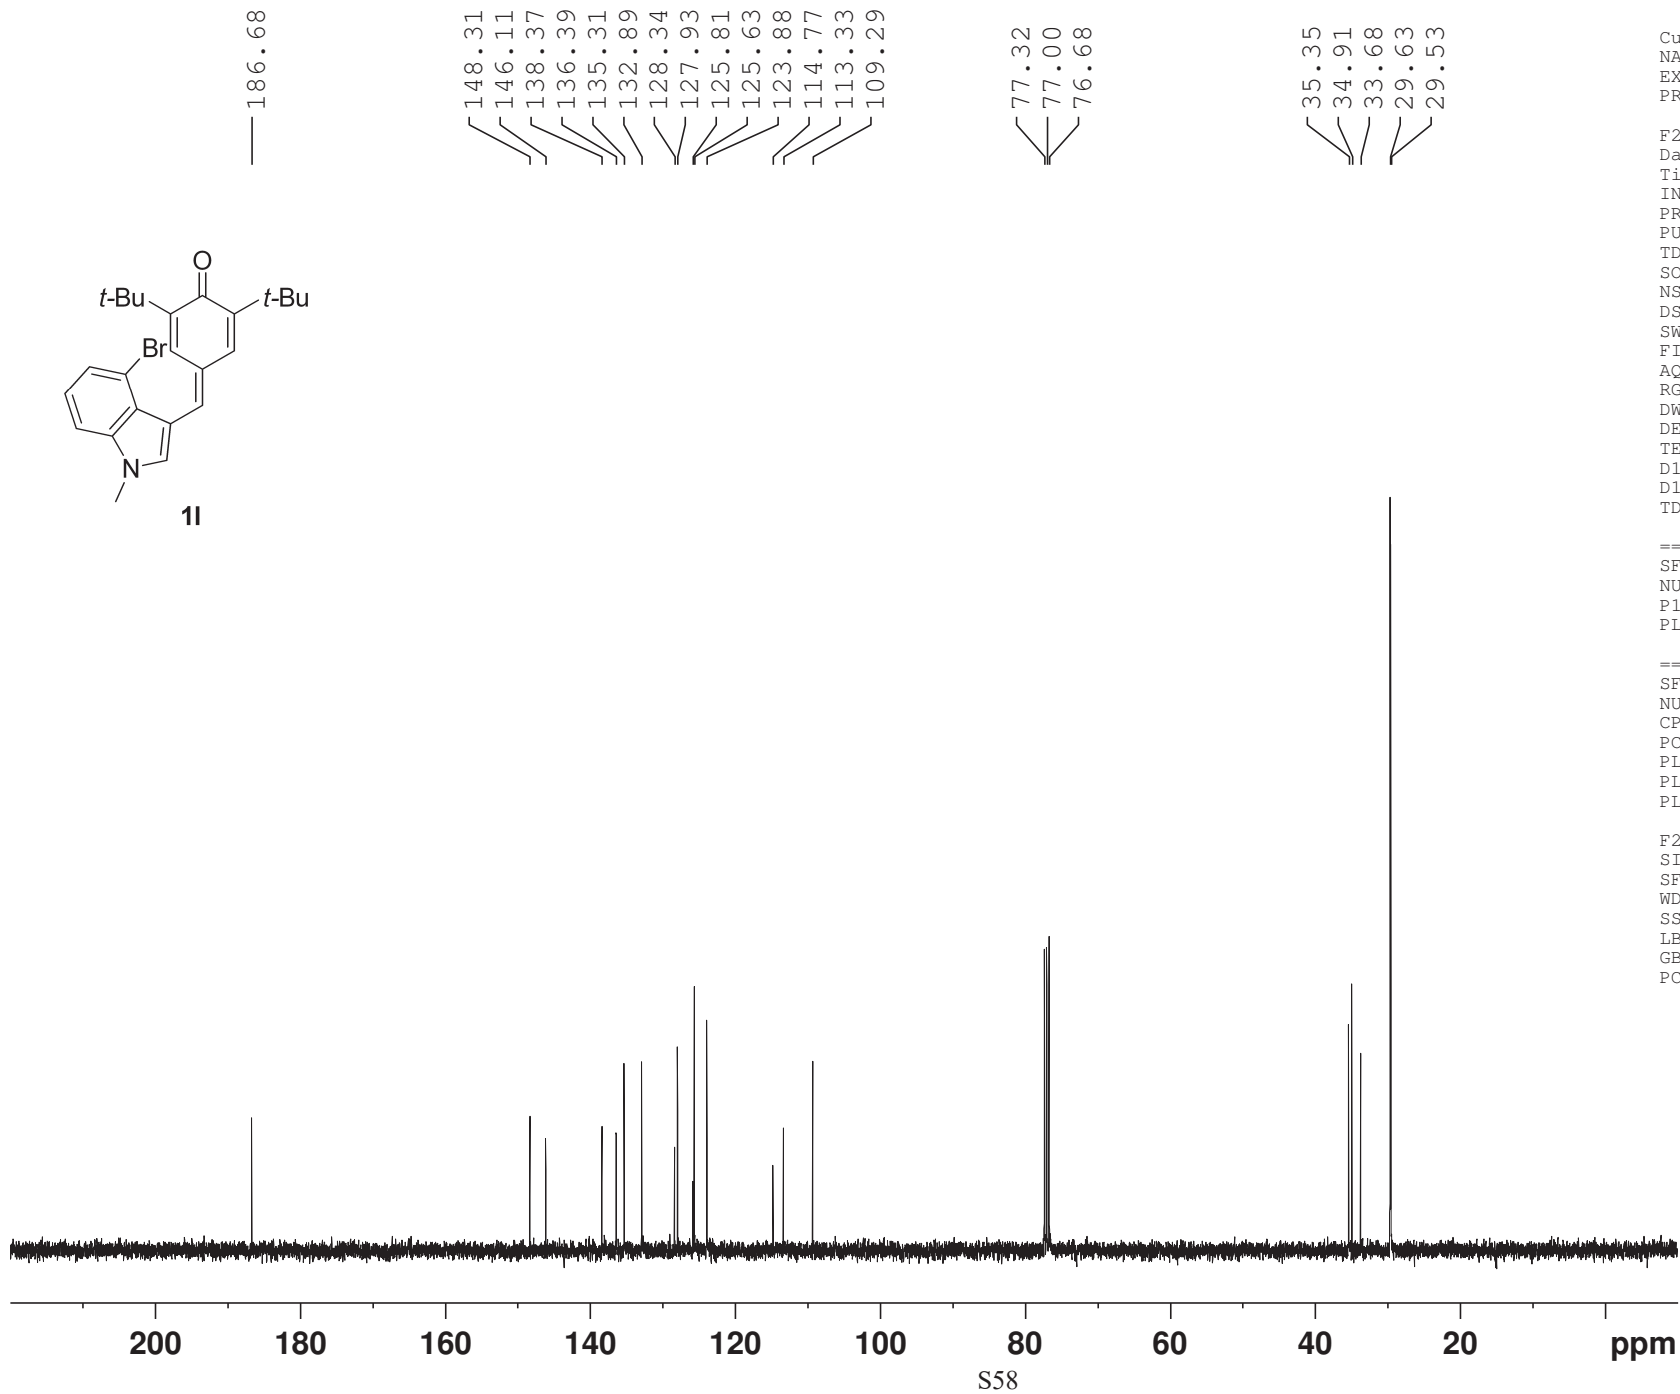

Current Data Parameters  
 NAME 4-Br  
 EXPNO 11  
 PROCNO 1

F2 - Acquisition Parameters  
 Date\_ 20180810  
 Time 8.53  
 INSTRUM spect  
 PROBHD 5 mm PABBO BB/  
 PULPROG zgpg30  
 TD 65536  
 SOLVENT CDCl3  
 NS 50  
 DS 2  
 SWH 25252.525 Hz  
 FIDRES 0.385323 Hz  
 AQ 1.2976128 sec  
 RG 2050  
 DW 19.800 usec  
 DE 6.50 usec  
 TE 295.1 K  
 D1 2.00000000 sec  
 D11 0.03000000 sec  
 TD0 1

===== CHANNEL f1 =====  
 SFO1 100.6238364 MHz  
 NUC1 13C  
 P1 15.50 usec  
 PLW1 25.00000000 W

===== CHANNEL f2 =====  
 SFO2 400.1316005 MHz  
 NUC2 1H  
 CPDPRG[2] waltz16  
 PCPD2 80.00 usec  
 PLW2 19.50000000 W  
 PLW12 0.51492000 W  
 PLW13 0.32955000 W

F2 - Processing parameters  
 SI 32768  
 SF 100.6127745 MHz  
 WDW EM  
 SSB 0  
 LB 1.00 Hz  
 GB 0  
 PC 1.40

7.817  
7.804  
7.801  
7.616  
7.611  
7.449  
7.400  
7.387  
7.383  
7.364  
7.350  
7.346  
7.341  
7.329  
7.311  
7.308  
7.293  
7.290  
7.275  
7.272  
7.246  
7.242  
7.227  
7.108  
7.102  
5.361

1.354  
1.294

0.000

```

Current Data Parameters
NAME          N-Bn
EXPNO         10
PROCNO        1

F2 - Acquisition Parameters
Date_         20180810
Time          9.28
INSTRUM       spect
PROBHD        5 mm PABBO BB/
PULPROG       zg30
TD            65536
SOLVENT       CDCl3
NS            4
DS            2
SWH           8012.820 Hz
FIDRES        0.122266 Hz
AQ            4.089465 sec
RG            114
DW            62.400 usec
DE            6.50 usec
TE            293.8 K
D1            1.00000000 sec
TD0           1

===== CHANNEL f1 =====
SFO1          400.1324710 MHz
NUC1           1H
P1            12.40 usec
PLW1          19.00000000 W

F2 - Processing parameters
SI            65536
SF            400.1300152 MHz
WDW           EM
SSB           0
LB            0.30 Hz
GB            0
PC            1.00
  
```

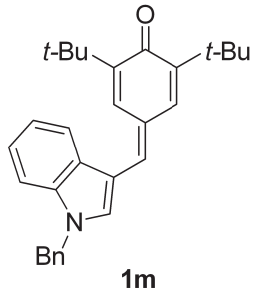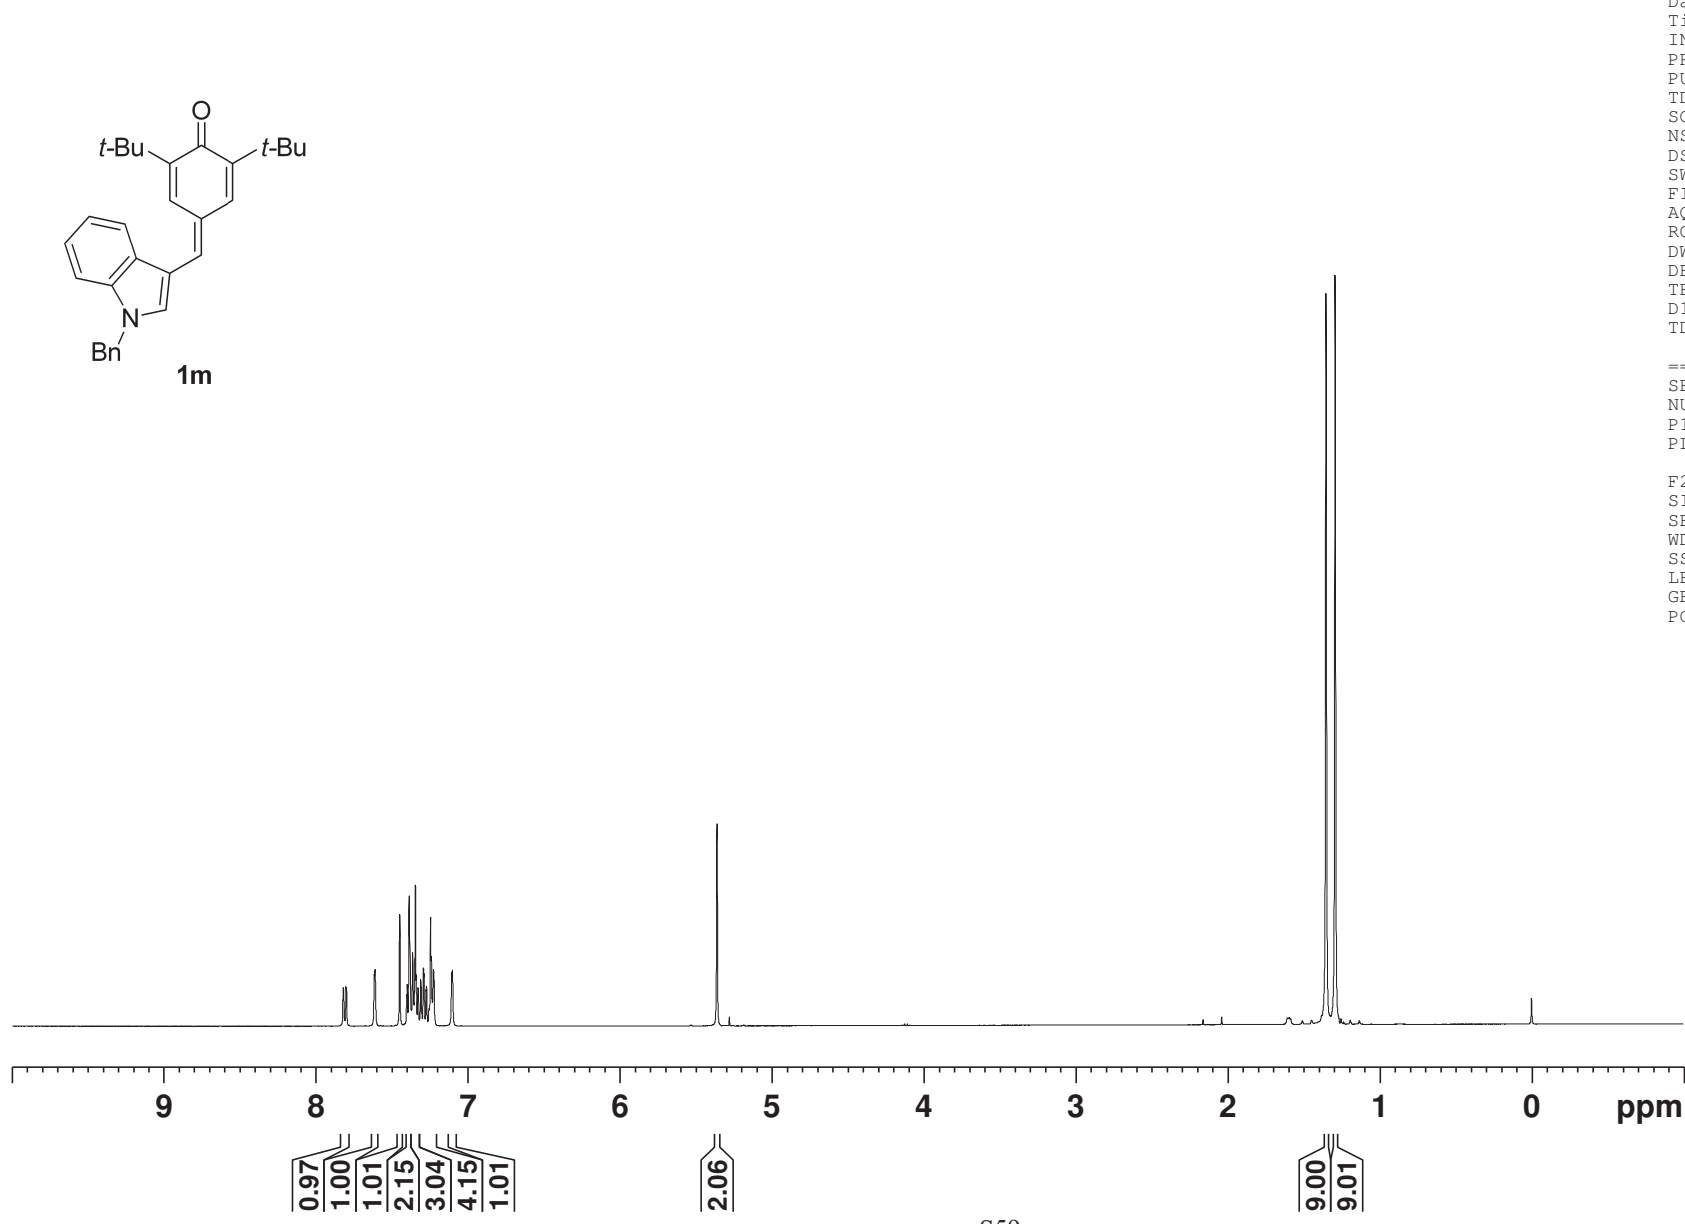

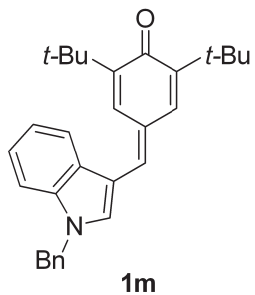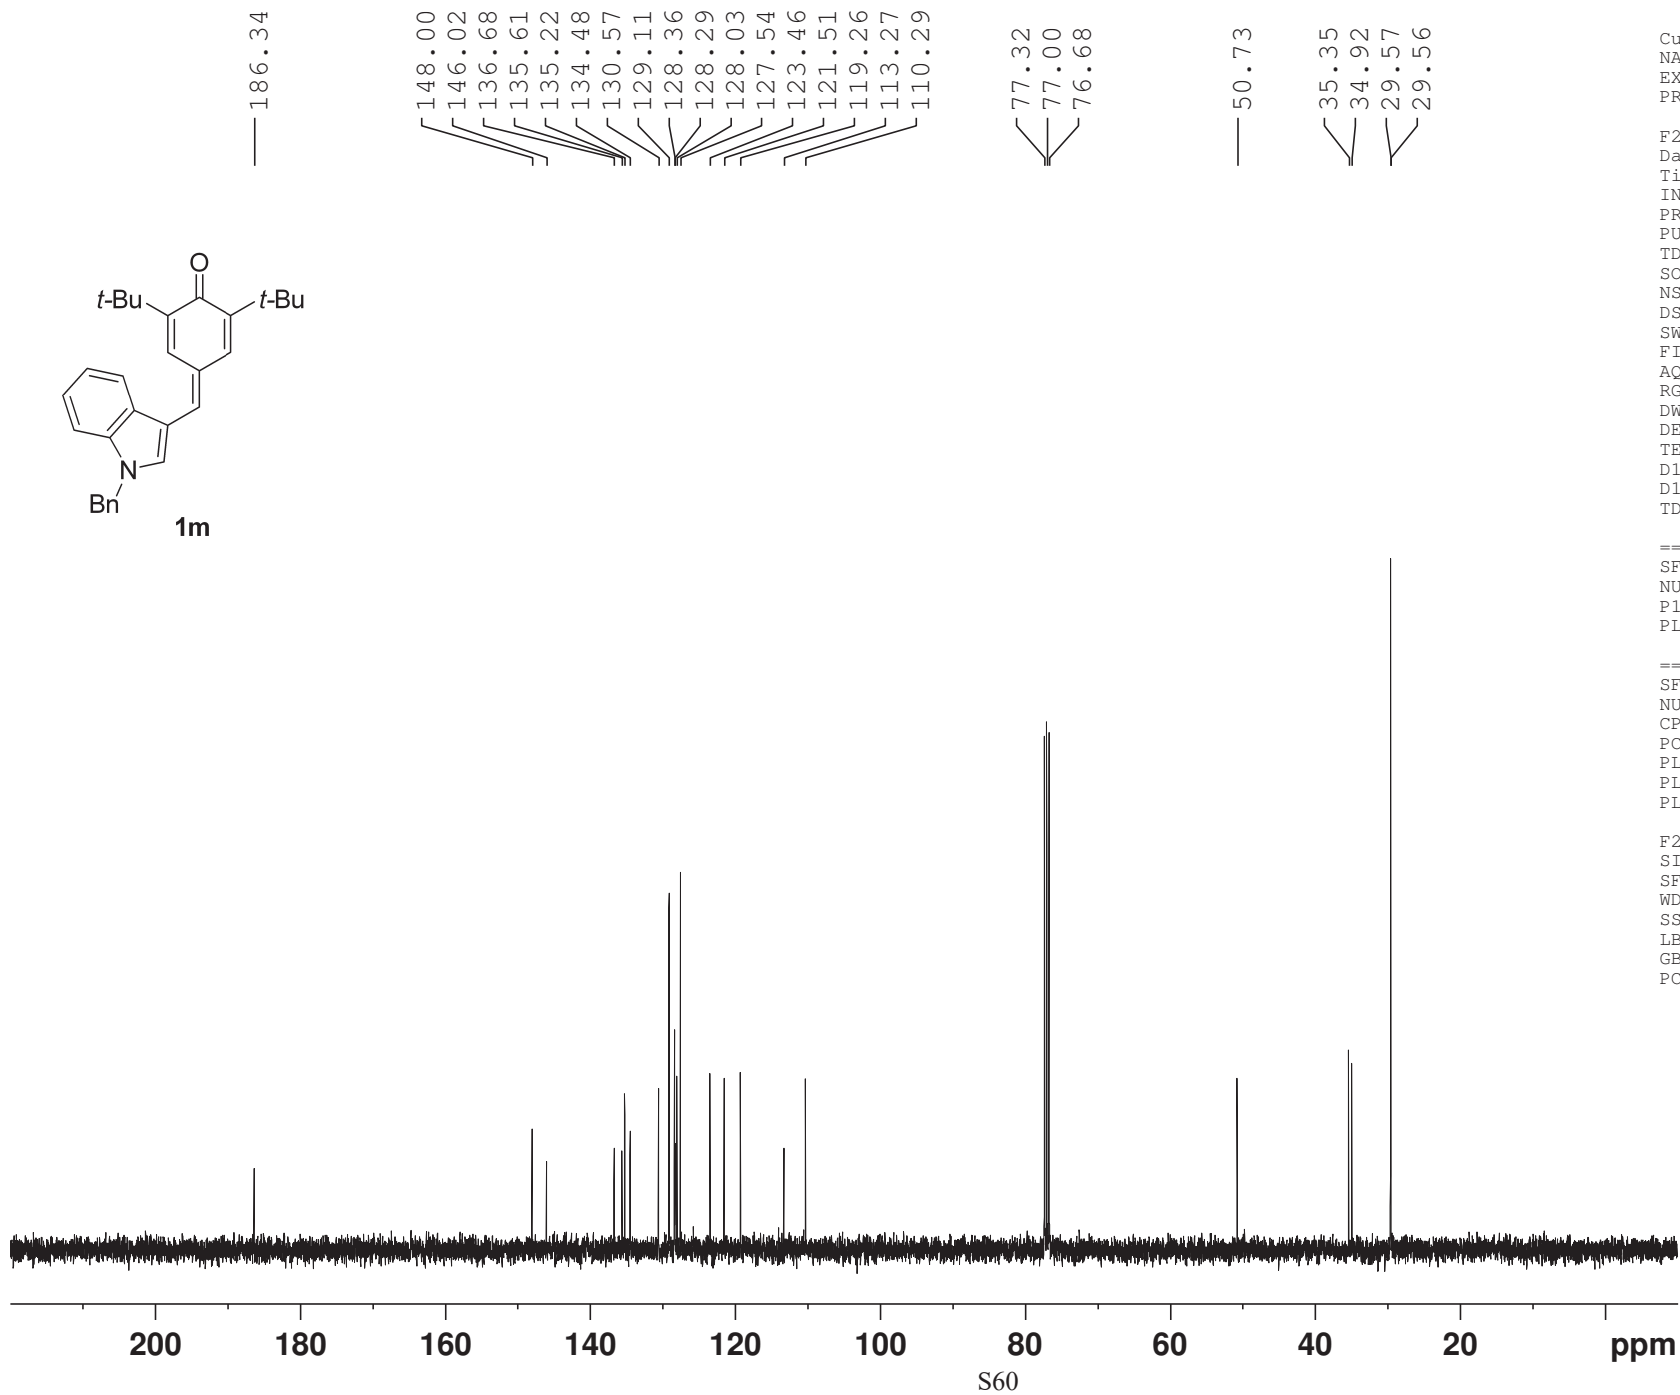

Current Data Parameters  
 NAME N-Bn  
 EXPNO 11  
 PROCNO 1

F2 - Acquisition Parameters  
 Date\_ 20180810  
 Time 9.31  
 INSTRUM spect  
 PROBHD 5 mm PABBO BB/  
 PULPROG zgpg30  
 TD 65536  
 SOLVENT CDC13  
 NS 50  
 DS 2  
 SWH 25252.525 Hz  
 FIDRES 0.385323 Hz  
 AQ 1.2976128 sec  
 RG 2050  
 DW 19.800 usec  
 DE 6.50 usec  
 TE 295.0 K  
 D1 2.00000000 sec  
 D11 0.03000000 sec  
 TD0 1

==== CHANNEL f1 =====  
 SFO1 100.6238364 MHz  
 NUC1 13C  
 P1 15.50 usec  
 PLW1 25.00000000 W

==== CHANNEL f2 =====  
 SFO2 400.1316005 MHz  
 NUC2 1H  
 CPDPRG[2] waltz16  
 PCPD2 80.00 usec  
 PLW2 19.50000000 W  
 PLW12 0.51492000 W  
 PLW13 0.32955000 W

F2 - Processing parameters  
 SI 32768  
 SF 100.6127729 MHz  
 WDW EM  
 SSB 0  
 LB 1.00 Hz  
 GB 0  
 PC 1.40

7.813  
7.794  
7.711  
7.705  
7.520  
7.390  
7.371  
7.339  
7.322  
7.304  
7.290  
7.287  
7.270  
7.249  
7.120  
7.114  
6.095  
6.082  
6.068  
6.055  
6.040  
6.026  
6.013  
6.000  
5.329  
5.303  
5.236  
5.193  
4.815  
4.801

1.364  
1.361

0.000

```

Current Data Parameters
NAME           N-allyl
EXPNO          10
PROCNO         1

F2 - Acquisition Parameters
Date_          20180810
Time           9.08
INSTRUM        spect
PROBHD         5 mm PABBO BB/
PULPROG        zg30
TD             65536
SOLVENT        CDCl3
NS             4
DS             2
SWH            8012.820 Hz
FIDRES         0.122266 Hz
AQ            4.0894465 sec
RG            101
DW            62.400 usec
DE            6.50 usec
TE            293.9 K
D1            1.00000000 sec
TD0           1

===== CHANNEL f1 =====
SFO1          400.1324710 MHz
NUC1           1H
P1            12.40 usec
PLW1          19.00000000 W

F2 - Processing parameters
SI            65536
SF            400.1300142 MHz
WDW           EM
SSB           0
LB            0.30 Hz
GB            0
PC            1.00
  
```

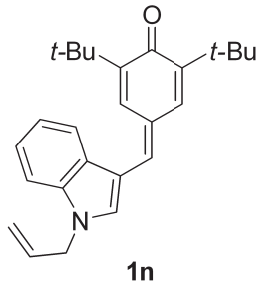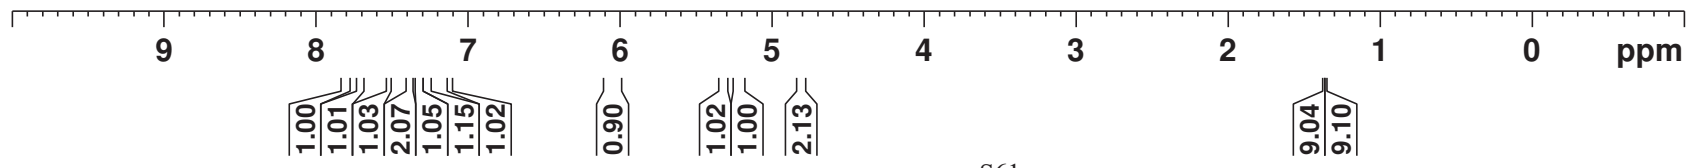

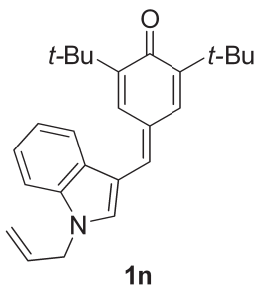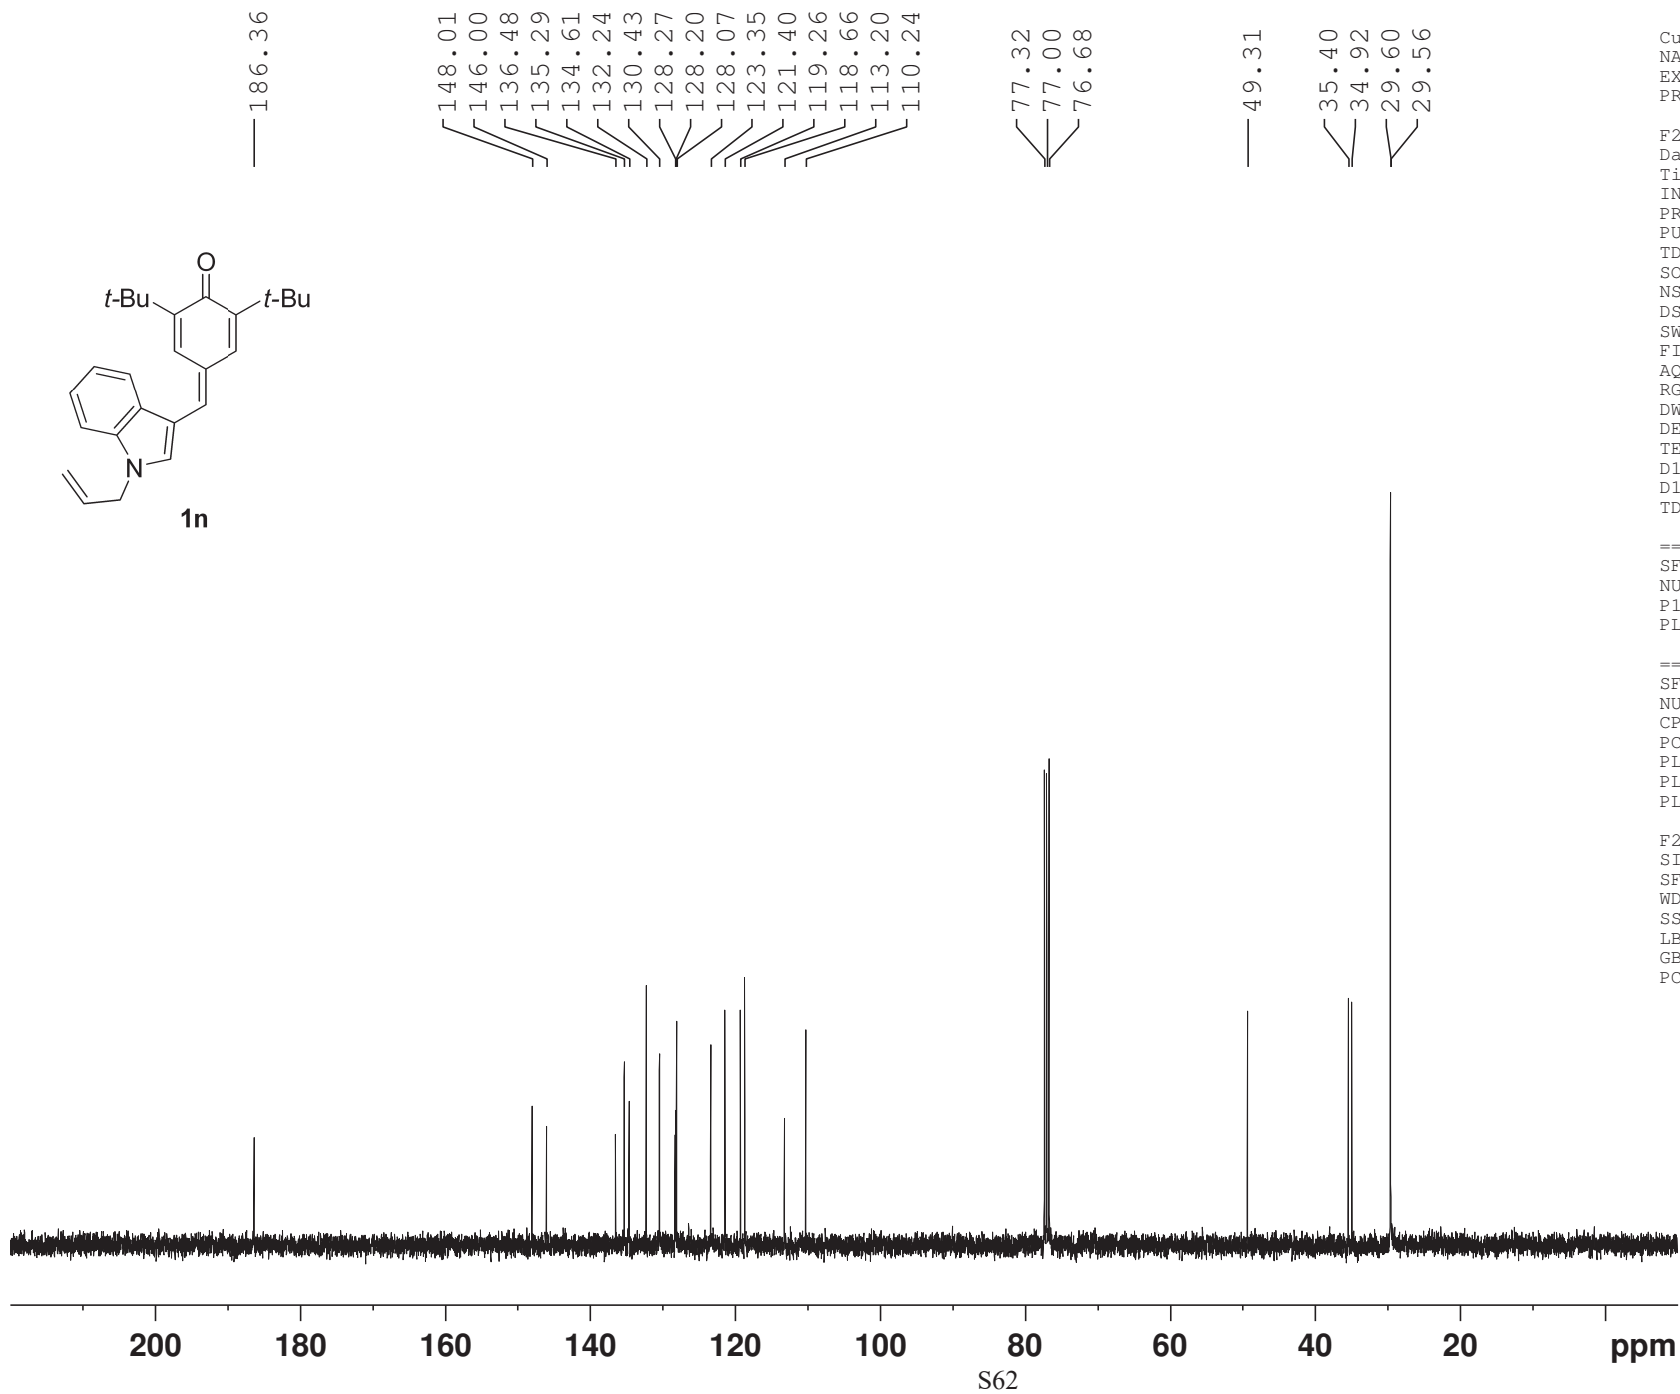

Current Data Parameters  
 NAME N-allyl  
 EXPNO 11  
 PROCNO 1

F2 - Acquisition Parameters  
 Date\_ 20180810  
 Time 9.12  
 INSTRUM spect  
 PROBHD 5 mm PABBO BB/  
 PULPROG zgpg30  
 TD 65536  
 SOLVENT CDC13  
 NS 50  
 DS 2  
 SWH 25252.525 Hz  
 FIDRES 0.385323 Hz  
 AQ 1.2976128 sec  
 RG 2050  
 DW 19.800 usec  
 DE 6.50 usec  
 TE 295.0 K  
 D1 2.00000000 sec  
 D11 0.03000000 sec  
 TD0 1

==== CHANNEL f1 =====  
 SFO1 100.6238364 MHz  
 NUC1 13C  
 P1 15.50 usec  
 PLW1 25.00000000 W

==== CHANNEL f2 =====  
 SFO2 400.1316005 MHz  
 NUC2 1H  
 CPDPRG[2] waltz16  
 PCPD2 80.00 usec  
 PLW2 19.50000000 W  
 PLW12 0.51492000 W  
 PLW13 0.32955000 W

F2 - Processing parameters  
 SI 32768  
 SF 100.6127732 MHz  
 WDW EM  
 SSB 0  
 LB 1.00 Hz  
 GB 0  
 PC 1.40

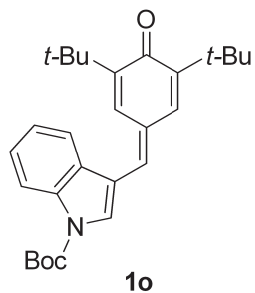

8.225  
8.213  
7.933  
7.711  
7.698  
7.426  
7.413  
7.401  
7.357  
7.344  
7.332  
7.231  
7.100  
7.097

1.698  
1.358  
1.355  
0.000

Current Data Parameters  
 NAME N-Boc  
 EXPNO 10  
 PROCNO 1

F2 - Acquisition Parameters  
 Date\_ 20210810  
 Time 10.08 h  
 INSTRUM Avance  
 PROBHD z114607\_0847 (  
 PULPROG zg30  
 TD 65536  
 SOLVENT CDCl3  
 NS 4  
 DS 2  
 SWH 11904.762 Hz  
 FIDRES 0.363304 Hz  
 AQ 2.7525120 sec  
 RG 47.619  
 DW 42.000 usec  
 DE 8.79 usec  
 TE 298.0 K  
 D1 1.00000000 sec  
 TD0 1  
 SFO1 600.1337058 MHz  
 NUC1 1H  
 P0 3.33 usec  
 P1 10.00 usec  
 PLW1 25.31200027 W

F2 - Processing parameters  
 SI 65536  
 SF 600.1300179 MHz  
 WDW EM  
 SSB 0  
 LB 0.30 Hz  
 GB 0  
 PC 1.00

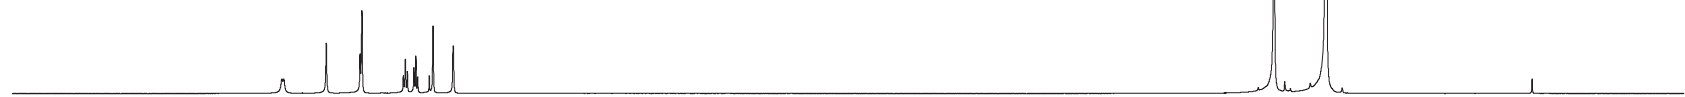

1.00  
1.01  
2.04  
1.04  
1.01  
1.01  
1.00

9.02  
9.05  
9.06



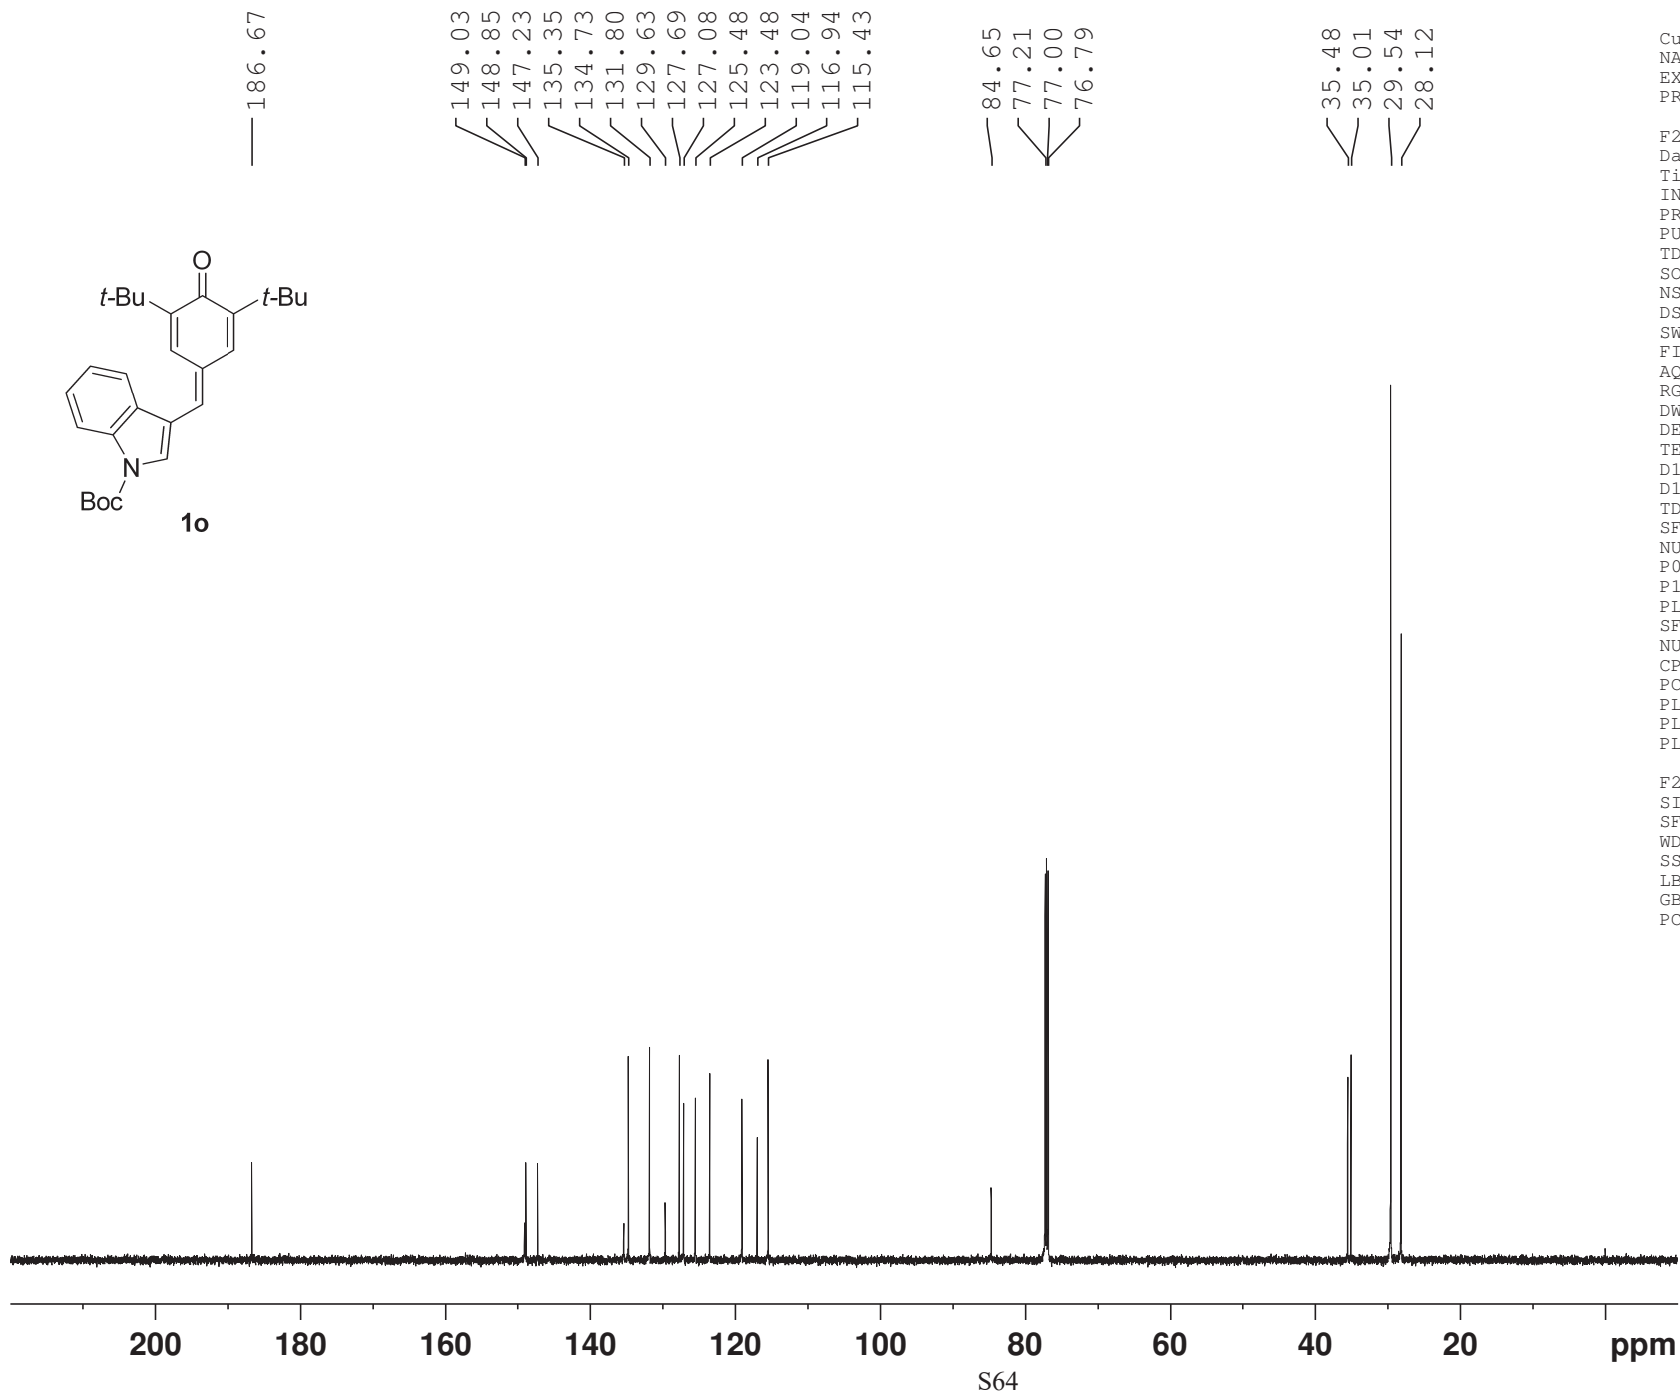

Current Data Parameters  
 NAME N-Boc  
 EXPNO 11  
 PROCNO 1

F2 - Acquisition Parameters  
 Date\_ 20210810  
 Time 10.14 h  
 INSTRUM Avance  
 PROBHD Z114607\_0847 (  
 PULPROG zgpg30  
 TD 65536  
 SOLVENT CDC13  
 NS 128  
 DS 4  
 SWH 37037.035 Hz  
 FIDRES 1.130281 Hz  
 AQ 0.8847360 sec  
 RG 101  
 DW 13.500 usec  
 DE 6.50 usec  
 TE 298.0 K  
 D1 2.00000000 sec  
 D11 0.03000000 sec  
 TD0 1  
 SFO1 150.9194079 MHz  
 NUC1 13C  
 P0 4.00 usec  
 P1 12.00 usec  
 PLW1 87.25299835 W  
 SFO2 600.1324005 MHz  
 NUC2 1H  
 CPDPRG[2] waltz65  
 PCPD2 70.00 usec  
 PLW2 25.31200027 W  
 PLW12 0.51656997 W  
 PLW13 0.25983000 W

F2 - Processing parameters  
 SI 32768  
 SF 150.9028146 MHz  
 WDW EM  
 SSB 0  
 LB 1.00 Hz  
 GB 0  
 PC 1.40

7.918  
7.681  
7.668  
7.291  
7.277  
7.206  
7.194  
7.181  
7.158  
7.148  
7.113  
7.101  
7.088  
7.047  
7.035  
7.022  
6.939  
6.926  
6.914  
6.765  
6.751  
6.700  
6.664  
6.533  
6.521  
6.509  
4.968  
4.601

3.533  
3.391

2.416

1.239

0.000

Current Data Parameters  
 NAME yuky2462 3aa  
 EXPNO 20  
 PROCNO 1

F2 - Acquisition Parameters  
 Date\_ 20201116  
 Time 22.59 h  
 INSTRUM Avance  
 PROBHD z168773\_0004 (  
 PULPROG zg30  
 TD 65536  
 SOLVENT CDCl3  
 NS 16  
 DS 2  
 SWH 11904.762 Hz  
 FIDRES 0.363304 Hz  
 AQ 2.7525120 sec  
 RG 47.619  
 DW 42.000 usec  
 DE 13.73 usec  
 TE 298.0 K  
 D1 1.00000000 sec  
 TD0 1  
 SFO1 600.1337058 MHz  
 NUC1 1H  
 P0 3.94 usec  
 P1 11.82 usec  
 PLW1 31.62299919 W

F2 - Processing parameters  
 SI 65536  
 SF 600.1300240 MHz  
 WDW EM  
 SSB 0  
 LB 0.30 Hz  
 GB 0  
 PC 1.00

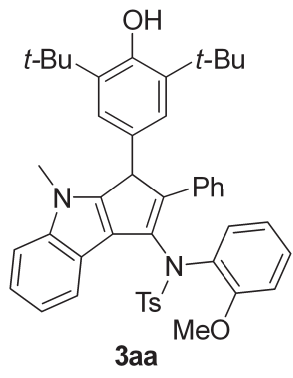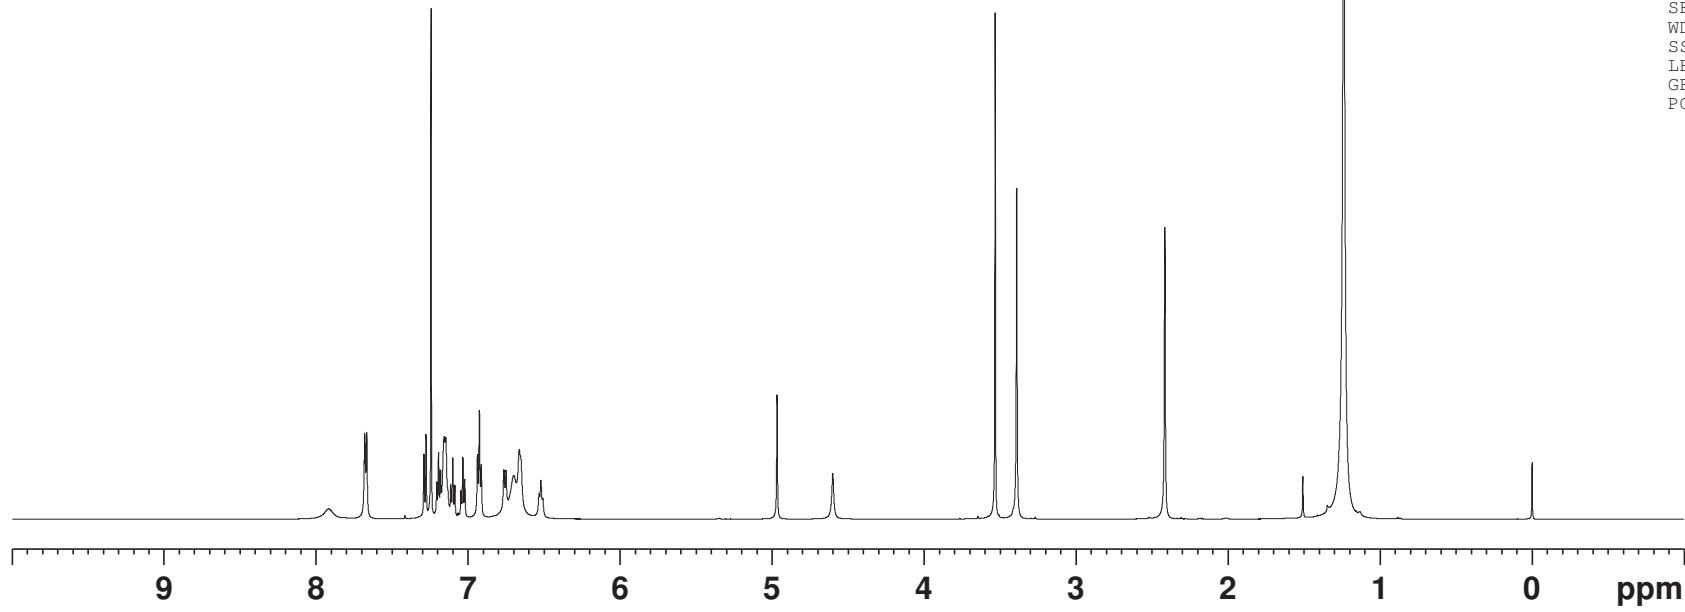

0.99  
2.00  
1.03  
4.01  
1.02  
1.02  
2.03  
6.02  
1.05

1.00  
0.99

3.00  
3.01

3.00

18.00

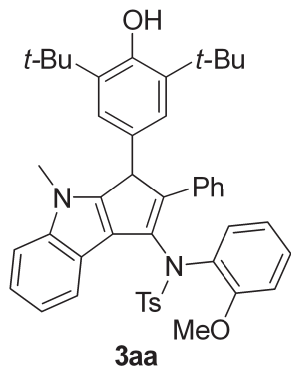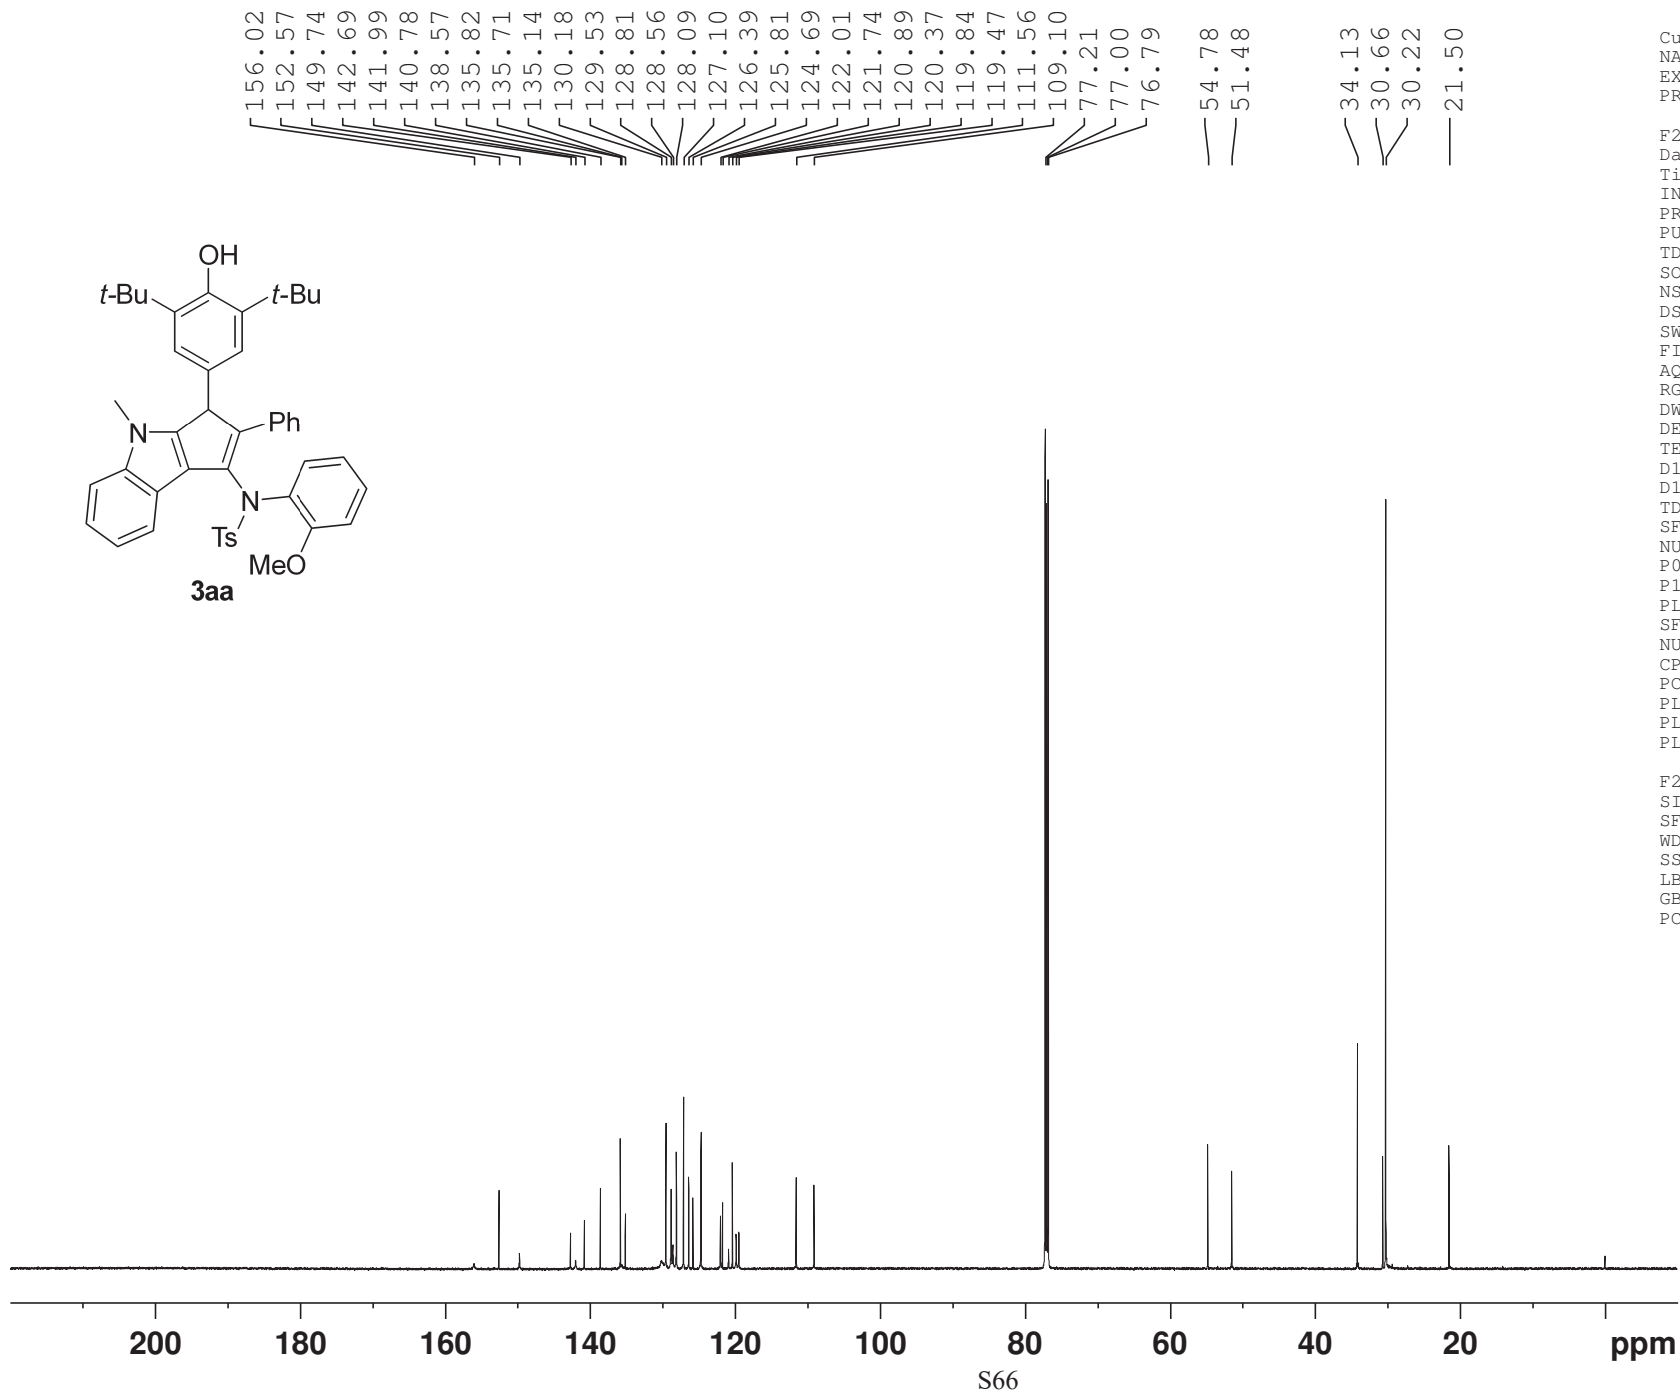

Current Data Parameters  
 NAME yuky2462 3aa  
 EXPNO 21  
 PROCNO 1

F2 - Acquisition Parameters  
 Date\_ 20201117  
 Time 1.56 h  
 INSTRUM Avance  
 PROBHD Z168773\_0004 (  
 PULPROG zgpg30  
 TD 65536  
 SOLVENT CDC13  
 NS 3600  
 DS 4  
 SWH 37037.035 Hz  
 FIDRES 1.130281 Hz  
 AQ 0.8847360 sec  
 RG 101  
 DW 13.500 usec  
 DE 18.00 usec  
 TE 298.0 K  
 D1 2.00000000 sec  
 D11 0.03000000 sec  
 TD0 1  
 SFO1 150.9194079 MHz  
 NUC1 13C  
 P0 6.13 usec  
 P1 18.38 usec  
 PLW1 76.86299896 W  
 SFO2 600.1324005 MHz  
 NUC2 1H  
 CPDPRG[2] waltz65  
 PCPD2 70.00 usec  
 PLW2 31.62299919 W  
 PLW12 0.94957000 W  
 PLW13 0.47762999 W

F2 - Processing parameters  
 SI 32768  
 SF 150.9028160 MHz  
 WDW EM  
 SSB 0  
 LB 1.00 Hz  
 GB 0  
 PC 1.40

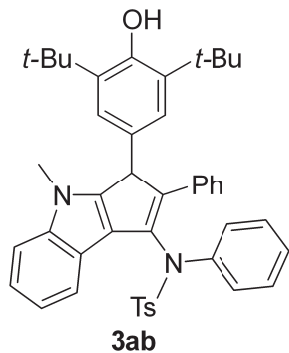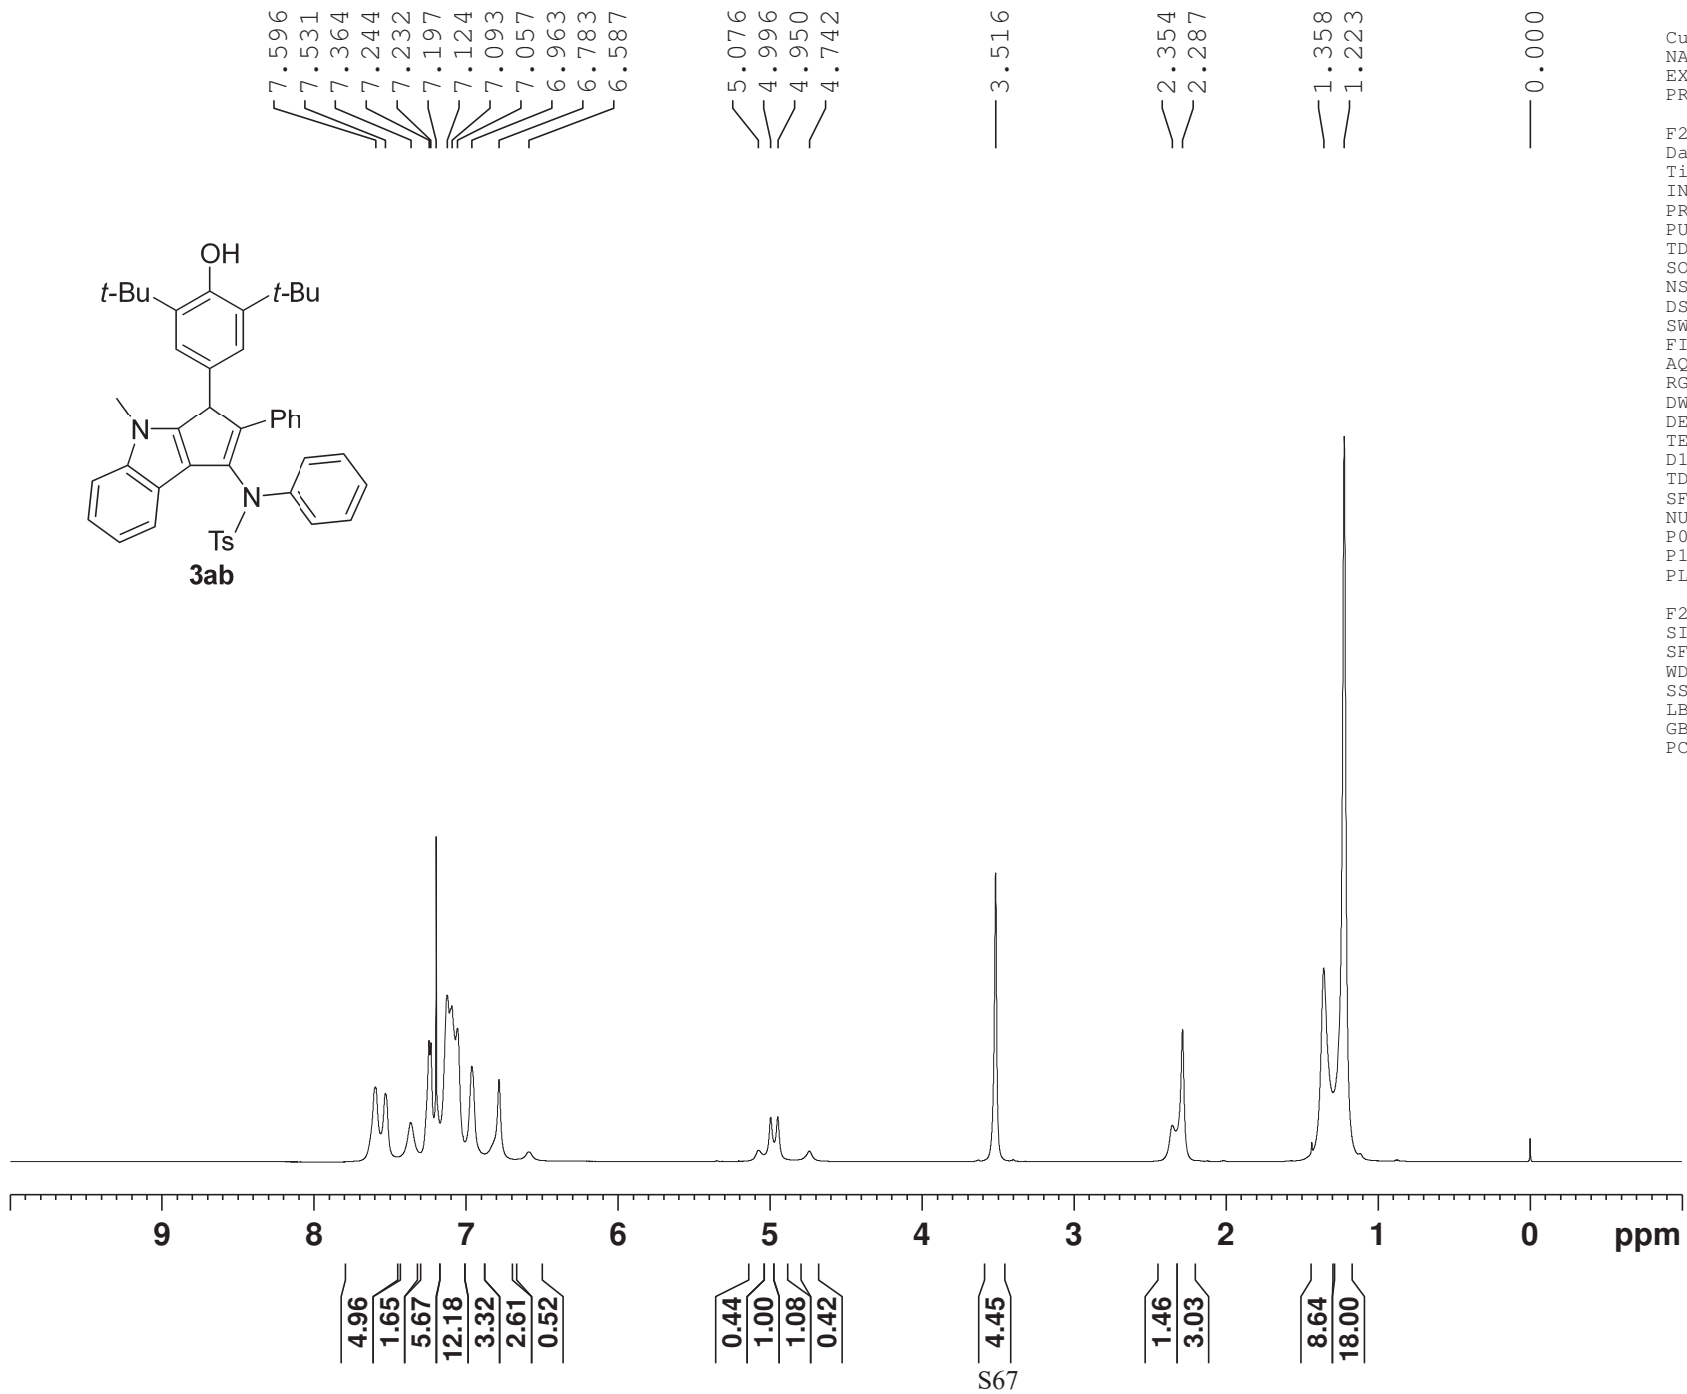

Current Data Parameters  
 NAME yuky2495 3ab  
 EXPNO 10  
 PROCNO 1

F2 - Acquisition Parameters  
 Date\_ 20201217  
 Time 13.05 h  
 INSTRUM Avance  
 PROBHD z168773\_0004 (  
 PULPROG zg30  
 TD 65536  
 SOLVENT CDCl3  
 NS 16  
 DS 2  
 SWH 11904.762 Hz  
 FIDRES 0.363304 Hz  
 AQ 2.7525120 sec  
 RG 20.7603  
 DW 42.000 usec  
 DE 13.73 usec  
 TE 298.1 K  
 D1 1.00000000 sec  
 TD0 1  
 SFO1 600.1337058 MHz  
 NUC1 1H  
 P0 3.94 usec  
 P1 11.82 usec  
 PLW1 31.62299919 W

F2 - Processing parameters  
 SI 65536  
 SF 600.1300522 MHz  
 WDW EM  
 SSB 0  
 LB 0.30 Hz  
 GB 0  
 PC 1.00

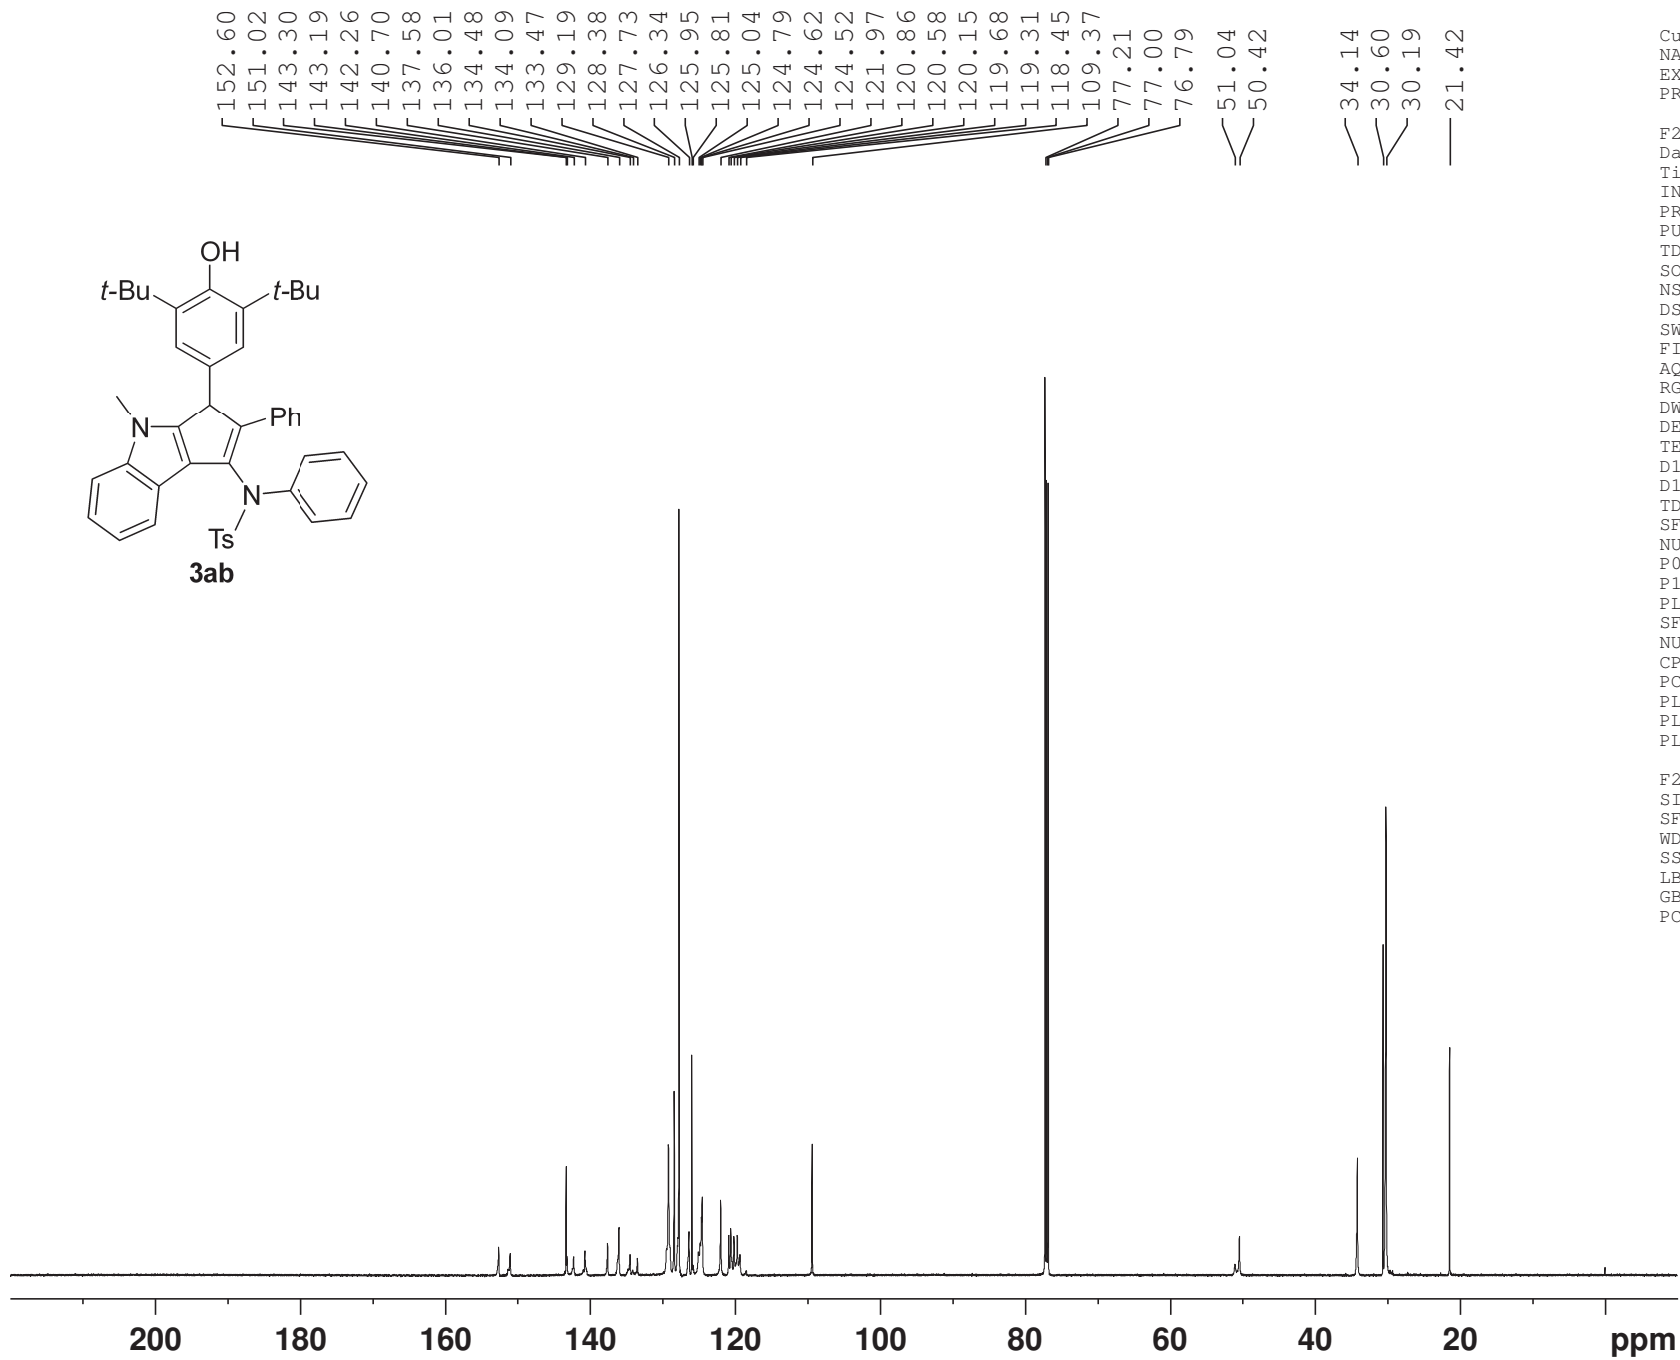

Current Data Parameters  
 NAME yuky2495 3ab  
 EXPNO 11  
 PROCNO 1

F2 - Acquisition Parameters  
 Date\_ 20201217  
 Time 15.33 h  
 INSTRUM Avance  
 PROBHD Z168773\_0004 (  
 PULPROG zgpg30  
 TD 65536  
 SOLVENT CDCl3  
 NS 3000  
 DS 4  
 SWH 37037.035 Hz  
 FIDRES 1.130281 Hz  
 AQ 0.8847360 sec  
 RG 101  
 DW 13.500 usec  
 DE 18.00 usec  
 TE 298.1 K  
 D1 2.00000000 sec  
 D11 0.03000000 sec  
 TD0 1  
 SFO1 150.9194079 MHz  
 NUC1 13C  
 P0 6.13 usec  
 P1 18.38 usec  
 PLW1 76.86299896 W  
 SFO2 600.1324005 MHz  
 NUC2 1H  
 CPDPRG[2] waltz65  
 PCPD2 70.00 usec  
 PLW2 31.62299919 W  
 PLW12 0.94957000 W  
 PLW13 0.47762999 W

F2 - Processing parameters  
 SI 32768  
 SF 150.9028277 MHz  
 WDW EM  
 SSB 0  
 LB 1.00 Hz  
 GB 0  
 PC 1.40

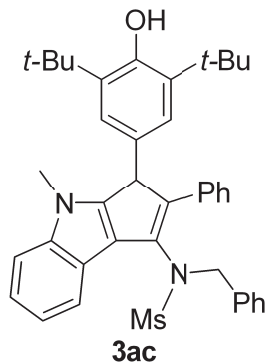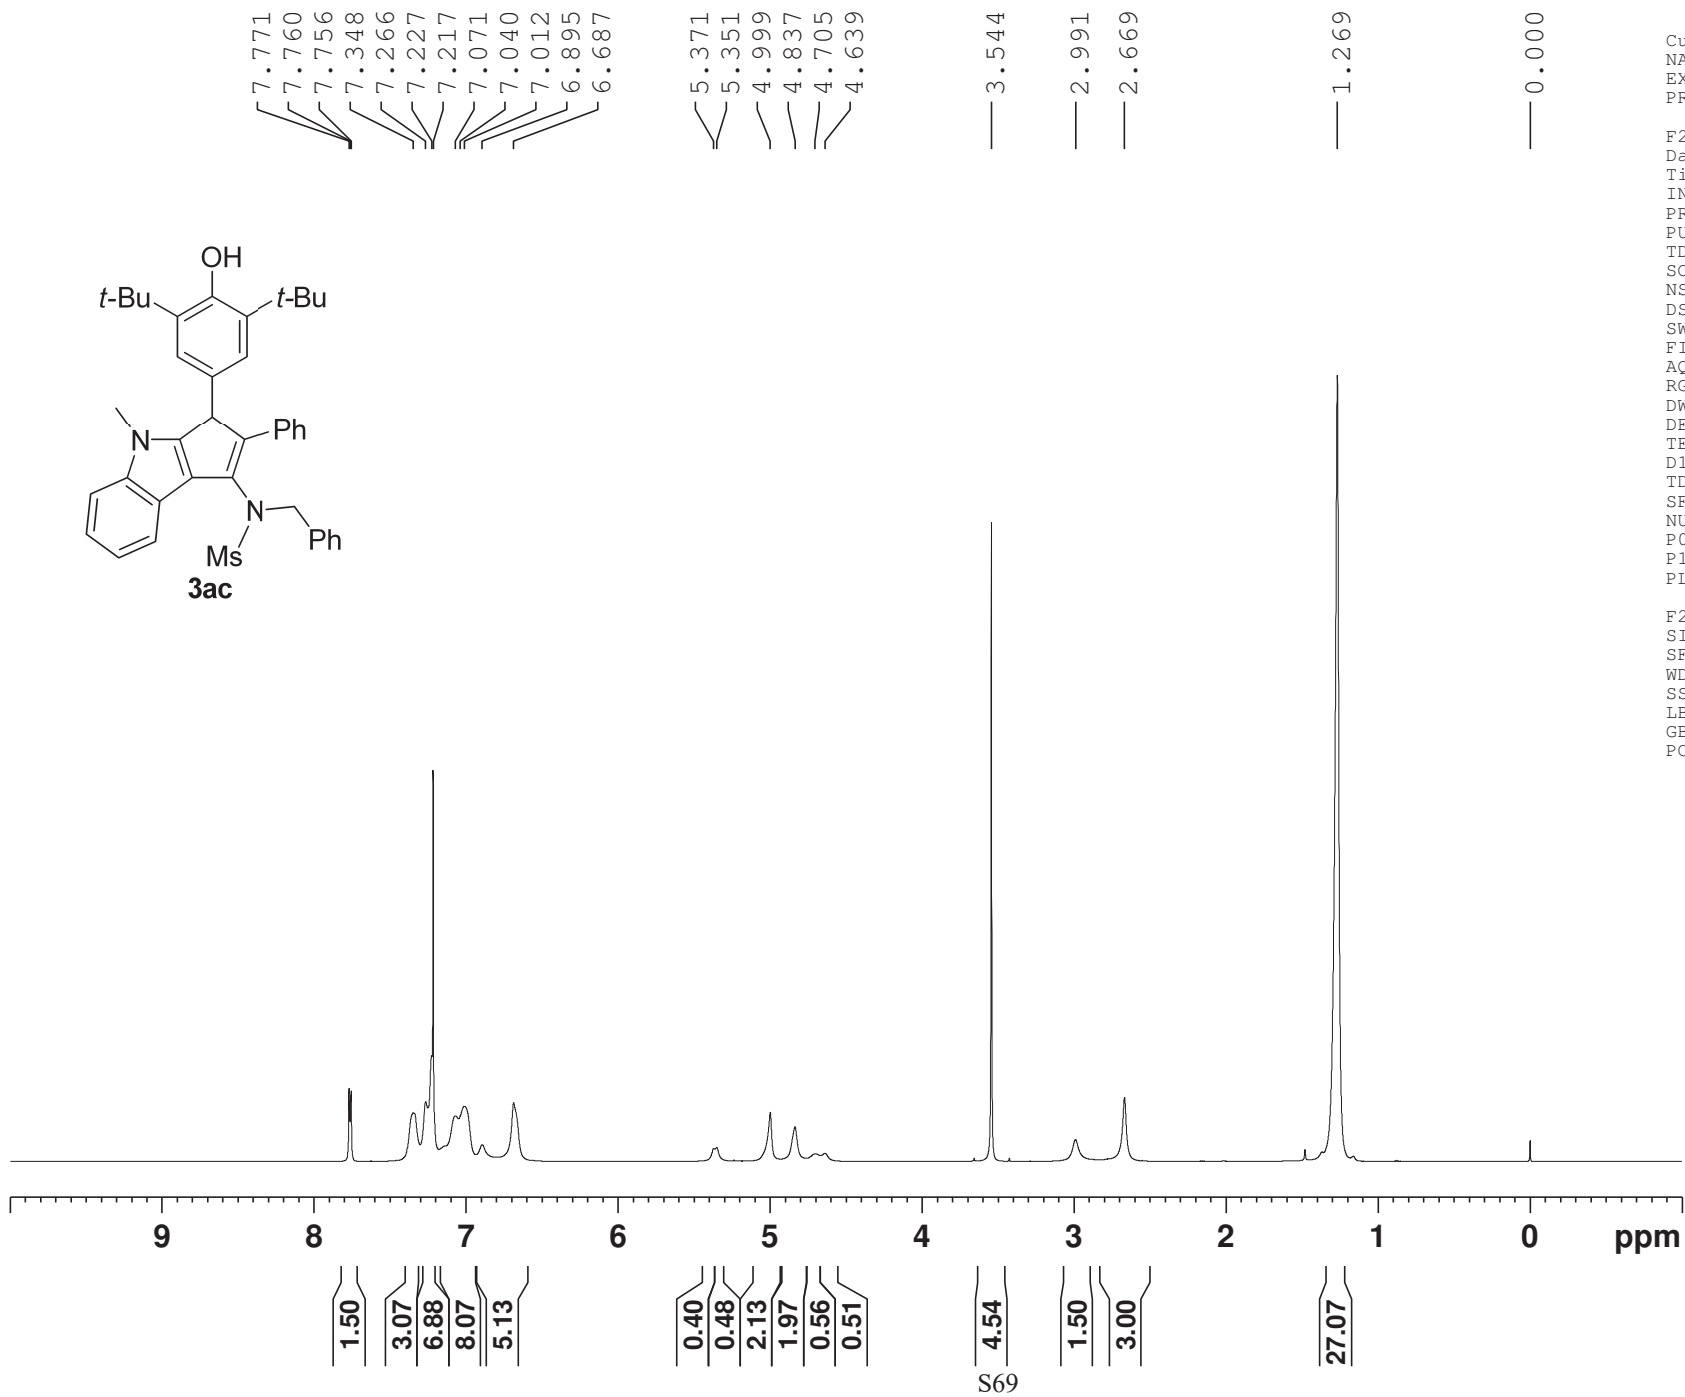

Current Data Parameters  
 NAME yuky2464 3ac  
 EXPNO 10  
 PROCNO 1

F2 - Acquisition Parameters  
 Date\_ 20201128  
 Time 14.32 h  
 INSTRUM Avance  
 PROBHD z150368\_0010 (  
 PULPROG zg30  
 TD 65536  
 SOLVENT CDCl3  
 NS 8  
 DS 2  
 SWH 11904.762 Hz  
 FIDRES 0.363304 Hz  
 AQ 2.7525120 sec  
 RG 12.9352  
 DW 42.000 usec  
 DE 18.78 usec  
 TE 298.0 K  
 D1 1.00000000 sec  
 TD0 1  
 SFO1 600.1337058 MHz  
 NUC1 1H  
 P0 4.33 usec  
 P1 13.00 usec  
 PLW1 21.26799965 W

F2 - Processing parameters  
 SI 65536  
 SF 600.1300401 MHz  
 WDW EM  
 SSB 0  
 LB 0.30 Hz  
 GB 0  
 PC 1.00



152.69  
151.54  
150.60  
142.45  
140.81  
136.36  
135.90  
134.86  
134.56  
132.96  
132.32  
129.77  
129.19  
128.87  
128.58  
128.07  
127.68  
127.45  
126.49  
125.53  
124.66  
120.77  
120.52  
120.14  
119.45  
117.63  
117.24  
109.92  
77.21  
77.00  
76.79  
53.56  
51.32  
40.36  
34.13  
30.71  
30.25

Current Data Parameters  
NAME yuky2464 3ac  
EXPNO 11  
PROCNO 1

F2 - Acquisition Parameters  
Date\_ 20201128  
Time 16.10 h  
INSTRUM Avance  
PROBHD Z150368\_0010 (  
PULPROG zgpg30  
TD 65536  
SOLVENT CDC13  
NS 2000  
DS 2  
SWH 37037.035 Hz  
FIDRES 1.130281 Hz  
AQ 0.8847360 sec  
RG 101  
DW 13.500 usec  
DE 18.00 usec  
TE 298.0 K  
D1 2.00000000 sec  
D11 0.03000000 sec  
TD0 1  
SFO1 150.9194079 MHz  
NUC1 13C  
P0 3.33 usec  
P1 10.00 usec  
PLW1 66.87999725 W  
SFO2 600.1324005 MHz  
NUC2 1H  
CPDPRG[2] waltz65  
PCPD2 80.00 usec  
PLW2 21.26799965 W  
PLW12 0.56160998 W  
PLW13 0.28204000 W

F2 - Processing parameters  
SI 32768  
SF 150.9028236 MHz  
WDW EM  
SSB 0  
LB 1.00 Hz  
GB 0  
PC 1.40

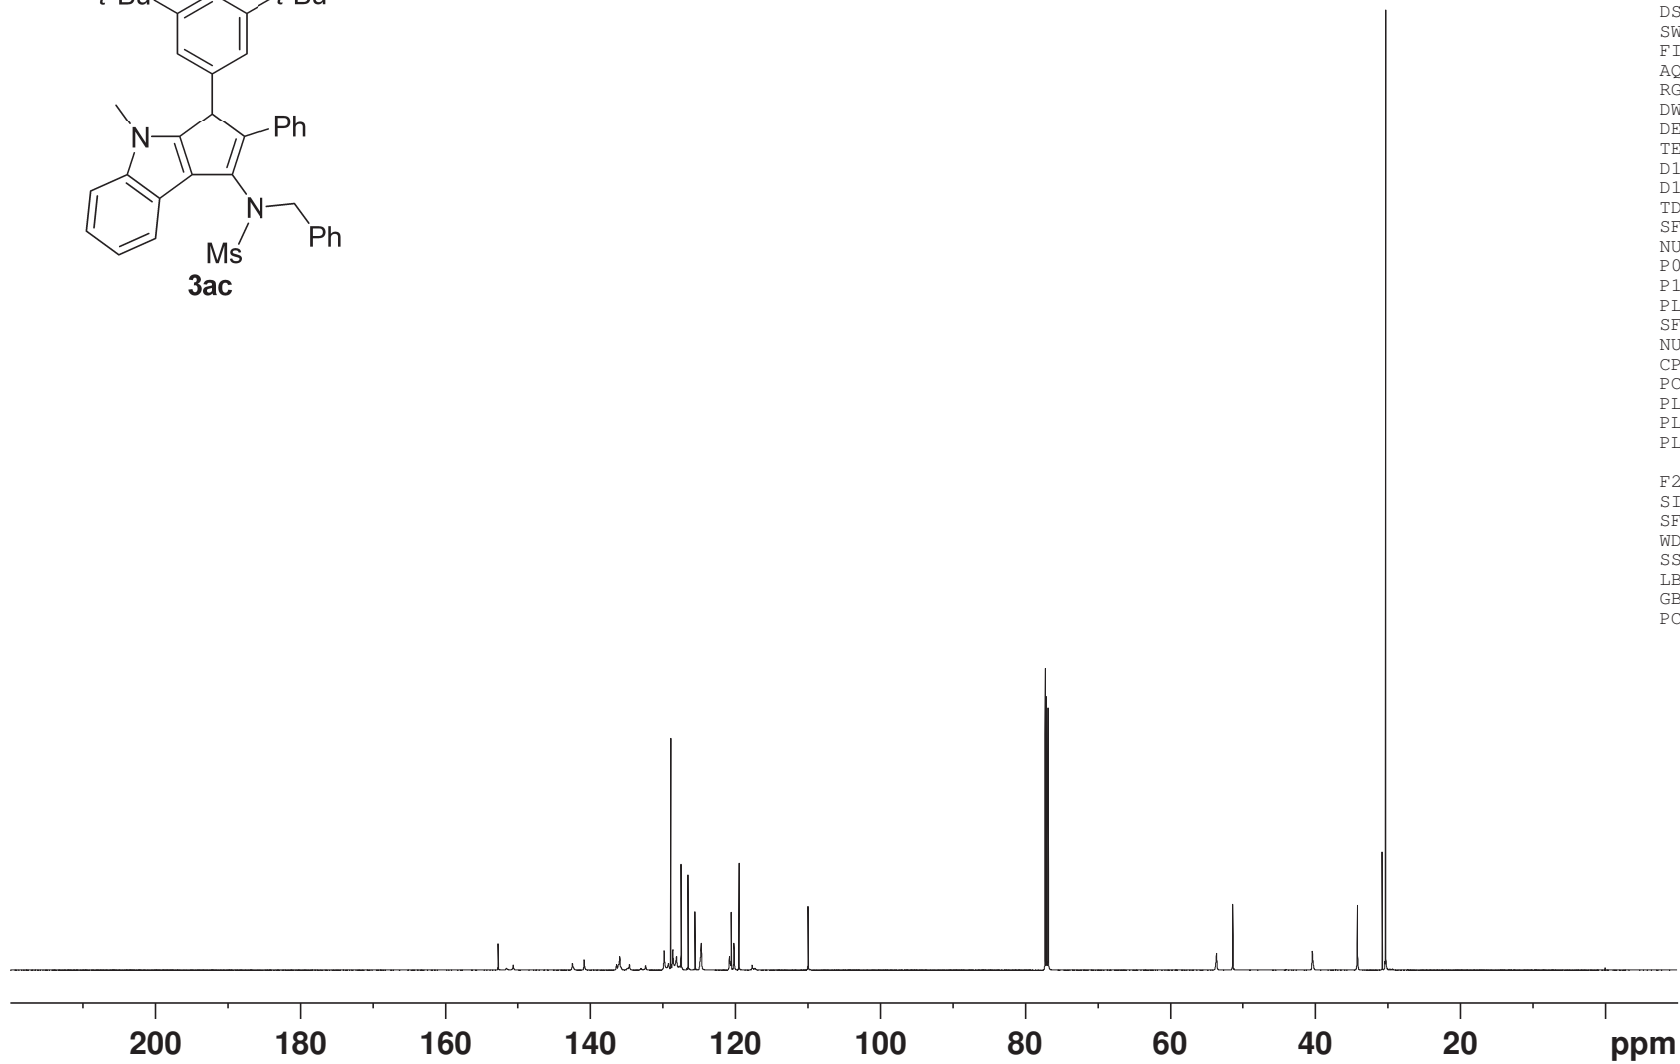

S70

7.773  
7.766  
7.763  
7.758  
7.750  
7.372  
7.353  
7.307  
7.299  
7.294  
7.289  
7.284  
7.260  
7.242  
7.228  
7.223  
7.214  
7.207  
7.199  
7.191  
7.152  
7.134  
7.116  
6.883  
5.033  
4.849

3.543  
3.500

2.754

1.300

0.000

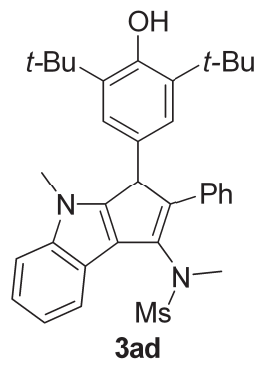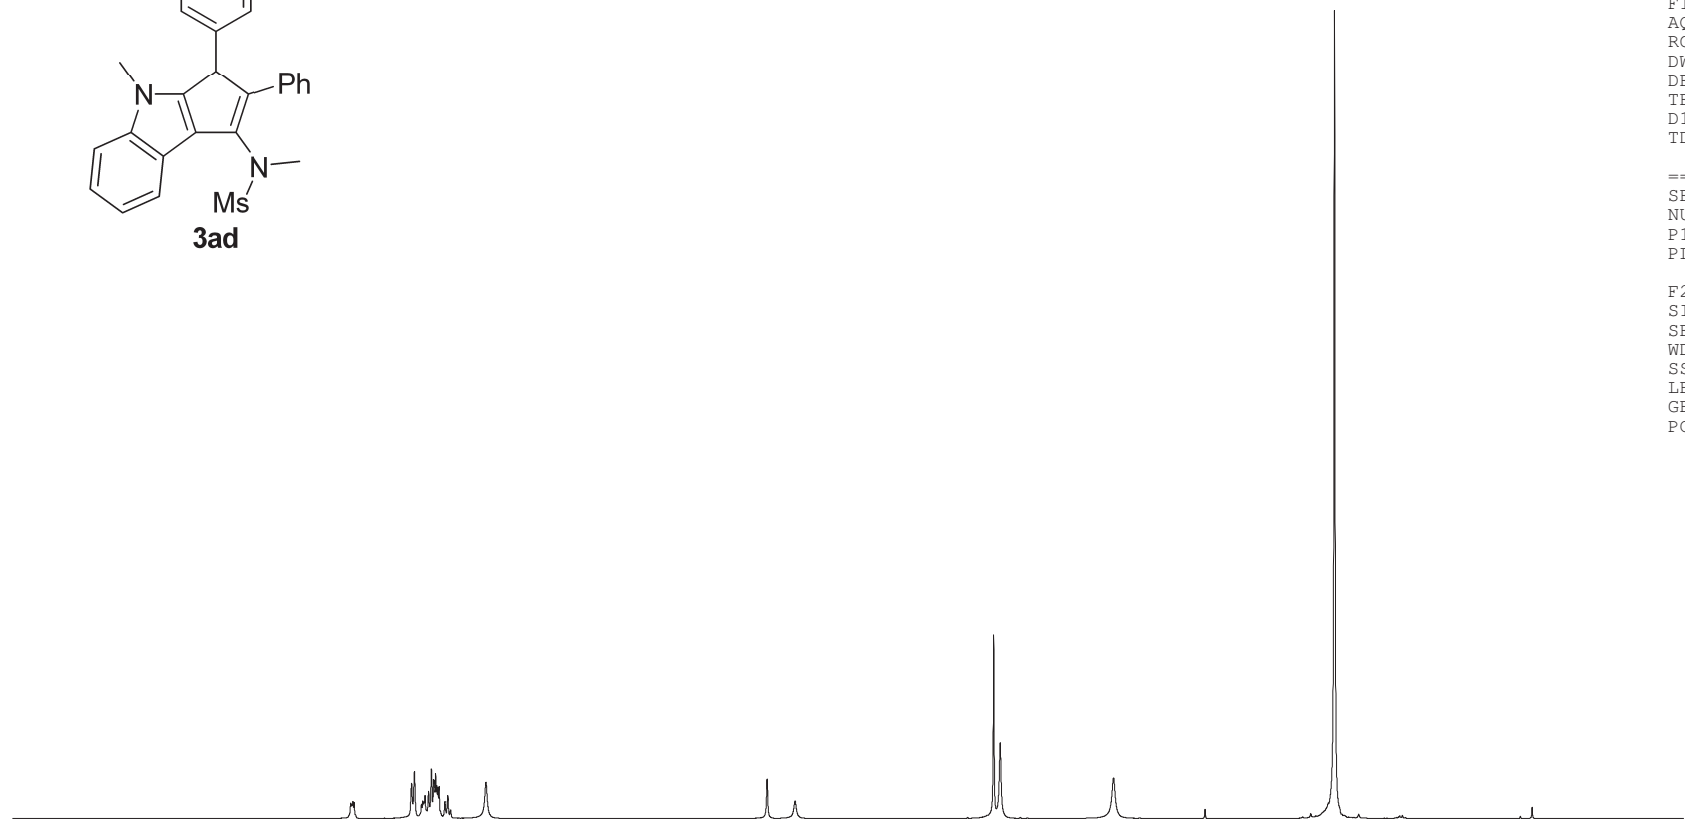

1.02  
2.05  
1.17  
4.37  
1.01  
2.00

1.01  
1.00

3.00  
2.88

3.02

18.01

Current Data Parameters  
 NAME yuky1914 3ad  
 EXPNO 14  
 PROCNO 1

F2 - Acquisition Parameters  
 Date\_ 20190326  
 Time 8.37  
 INSTRUM spect  
 PROBHD 5 mm PABBO BB/  
 PULPROG zg30  
 TD 65536  
 SOLVENT CDC13  
 NS 4  
 DS 2  
 SWH 8012.820 Hz  
 FIDRES 0.122266 Hz  
 AQ 4.089465 sec  
 RG 71.8  
 DW 62.400 usec  
 DE 6.50 usec  
 TE 292.4 K  
 D1 1.00000000 sec  
 TD0 1

==== CHANNEL f1 =====  
 SFO1 400.1324710 MHz  
 NUC1 1H  
 P1 12.40 usec  
 PLW1 19.00000000 W

F2 - Processing parameters  
 SI 65536  
 SF 400.1300226 MHz  
 WDW EM  
 SSB 0  
 LB 0.30 Hz  
 GB 0  
 PC 1.00



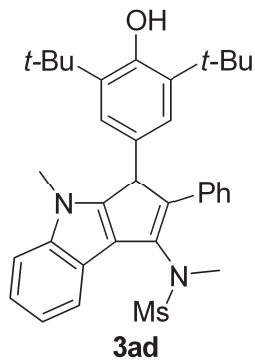

152.74  
151.47  
140.79  
140.50  
136.17  
135.02  
134.89  
128.33  
128.07  
126.60  
125.69  
124.67  
120.79  
120.45  
120.18  
119.57  
117.49  
109.86

77.32  
77.00  
76.68

50.61  
39.25  
37.08  
34.22  
30.69  
30.23

Current Data Parameters  
NAME yukyl914 3ad  
EXPNO 15  
PROCNO 1

F2 - Acquisition Parameters  
Date\_ 20190326  
Time 9.34  
INSTRUM spect  
PROBHD 5 mm PABBO BB/  
PULPROG zgpg30  
TD 65536  
SOLVENT CDCl3  
NS 1024  
DS 2  
SWH 25252.525 Hz  
FIDRES 0.385323 Hz  
AQ 1.2976128 sec  
RG 2050  
DW 19.800 usec  
DE 6.50 usec  
TE 293.5 K  
D1 2.00000000 sec  
D11 0.03000000 sec  
TD0 1

==== CHANNEL f1 =====  
SFO1 100.6238364 MHz  
NUC1 13C  
P1 15.50 usec  
PLW1 25.00000000 W

==== CHANNEL f2 =====  
SFO2 400.1316005 MHz  
NUC2 1H  
CPDPRG[2] waltz16  
PCPD2 80.00 usec  
PLW2 19.50000000 W  
PLW12 0.51492000 W  
PLW13 0.32955000 W

F2 - Processing parameters  
SI 32768  
SF 100.6127766 MHz  
WDW EM  
SSB 0  
LB 1.00 Hz  
GB 0  
PC 1.40

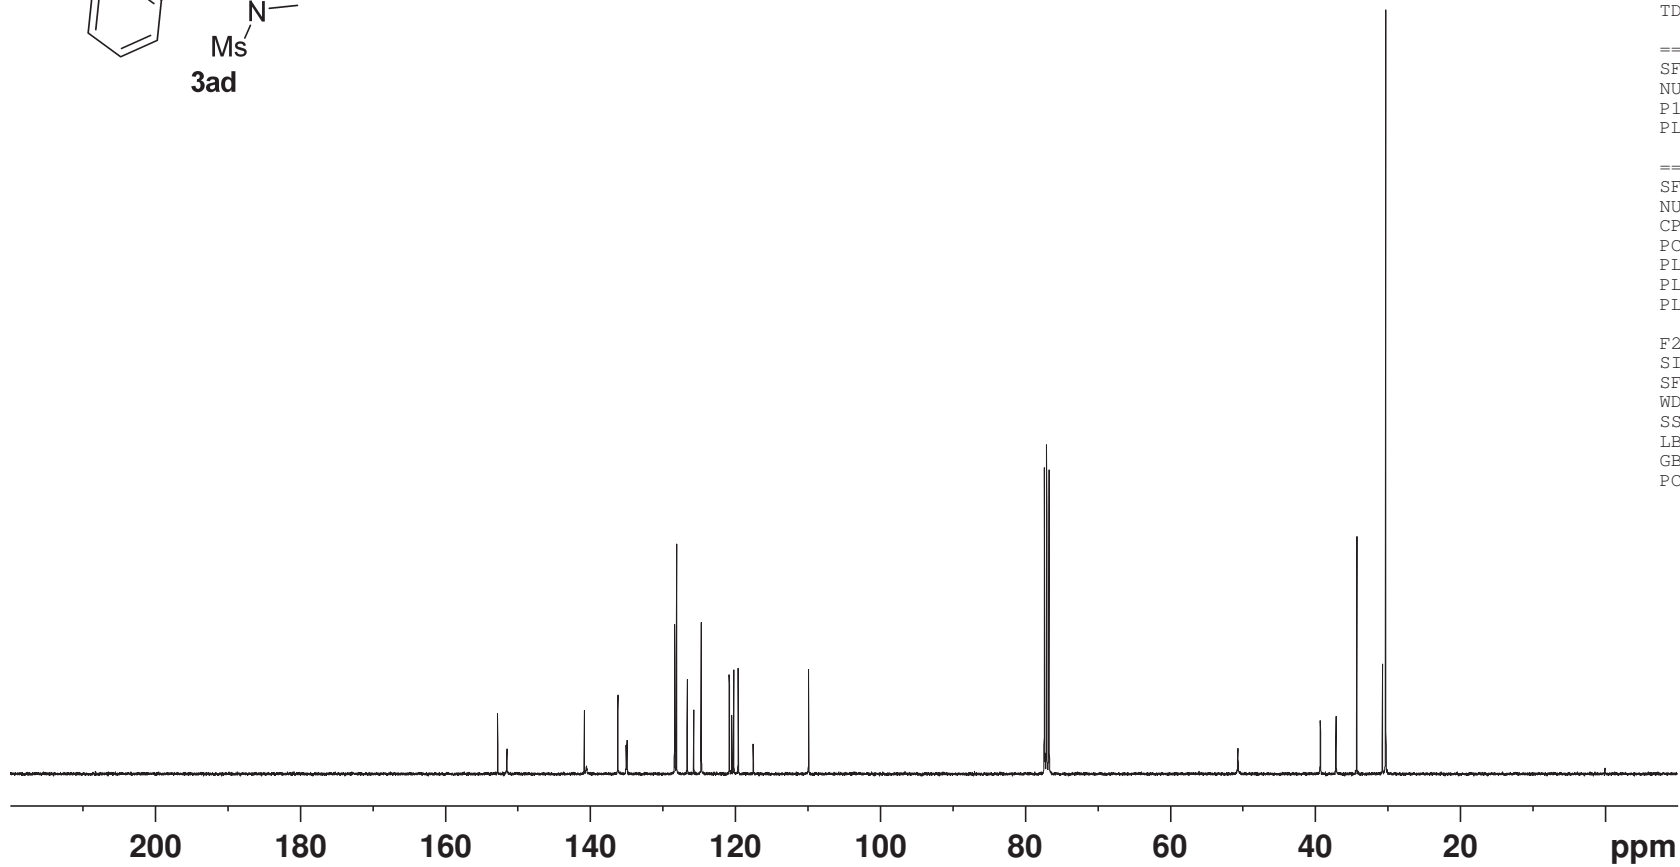

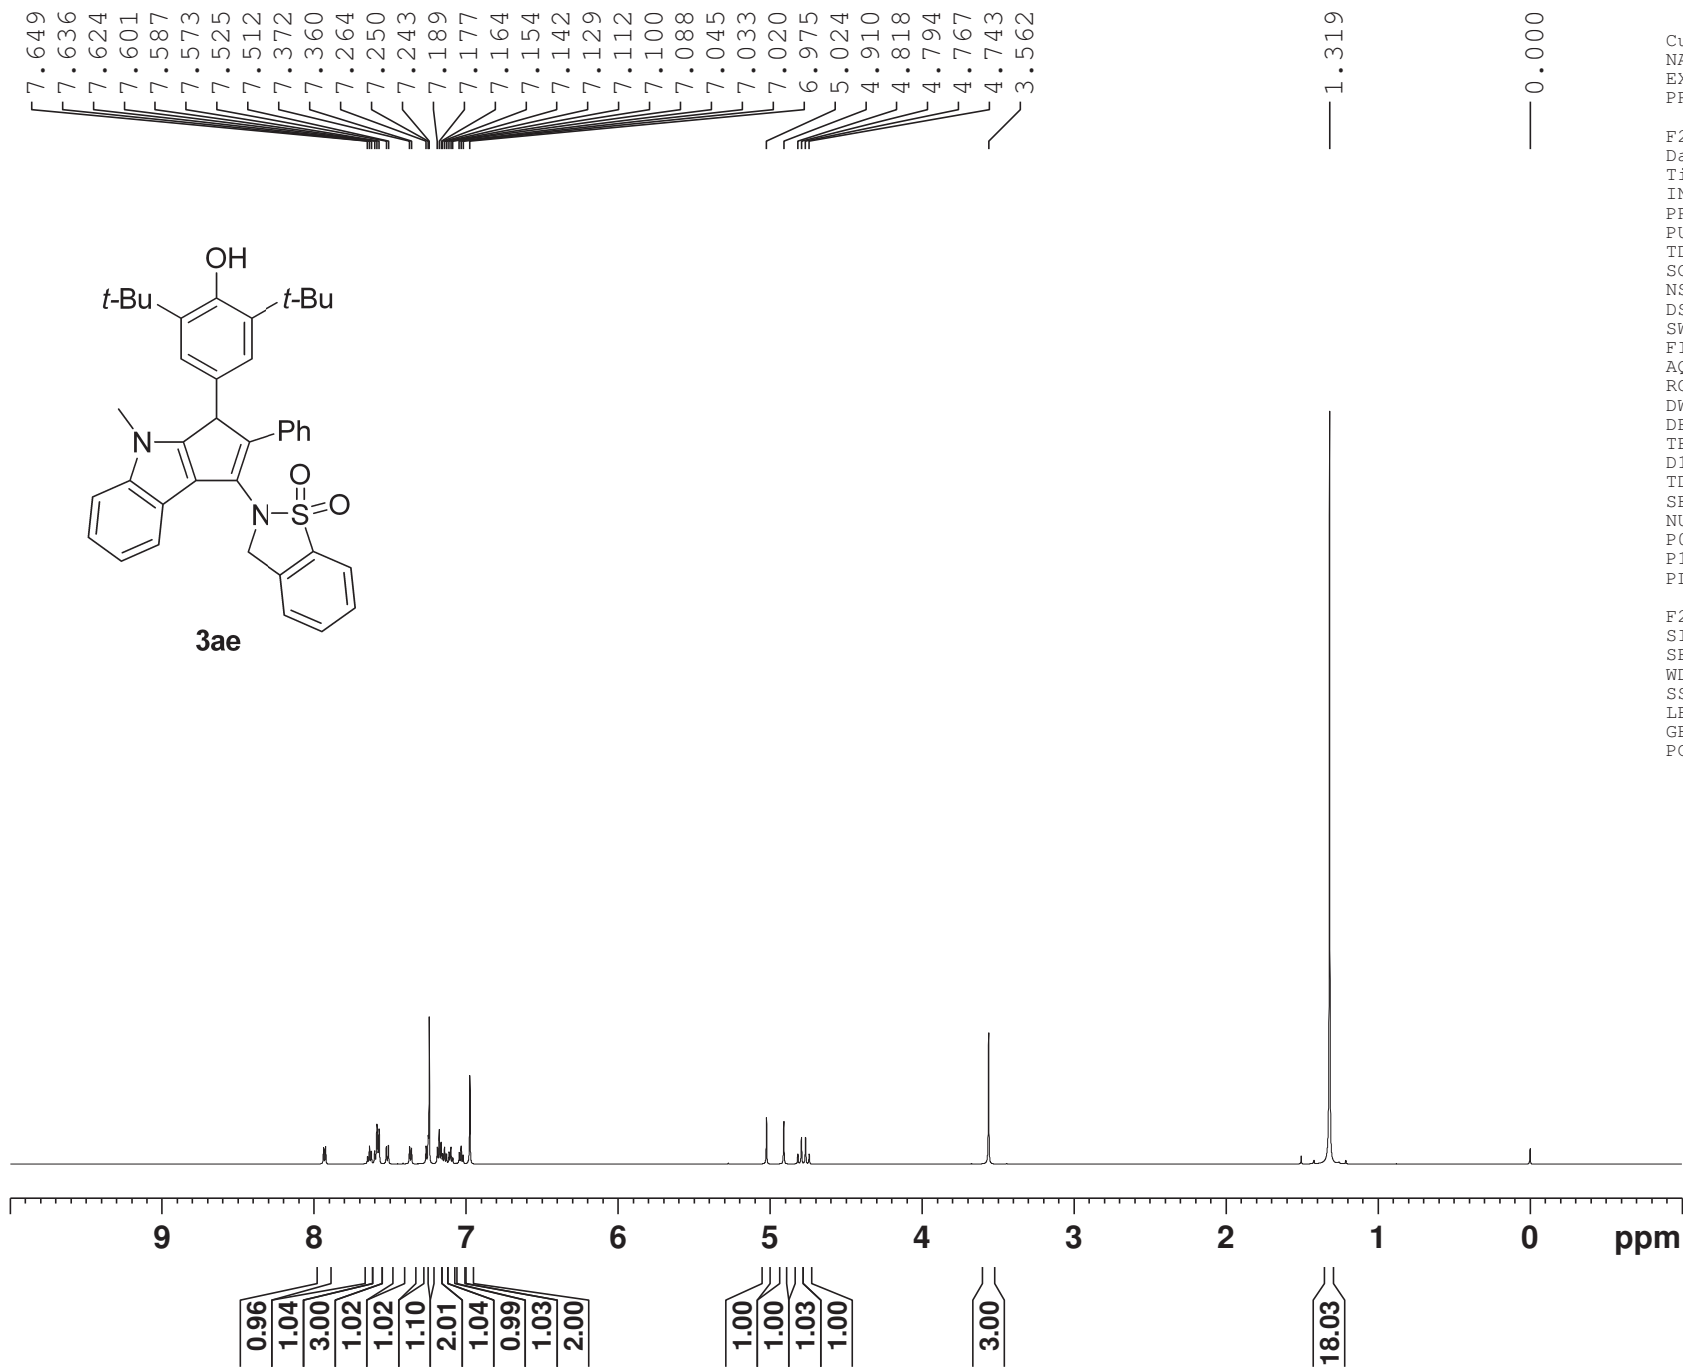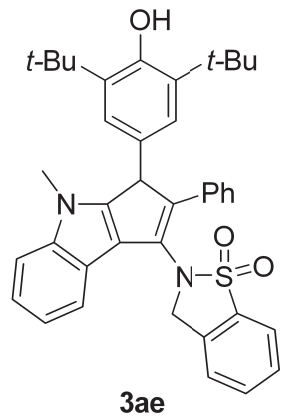

Current Data Parameters  
 NAME yuky2466 3ae  
 EXPNO 10  
 PROCNO 1

F2 - Acquisition Parameters  
 Date\_ 20201128  
 Time 8.34 h  
 INSTRUM Avance  
 PROBHD z150368\_0010 (  
 PULPROG zg30  
 TD 65536  
 SOLVENT CDCl3  
 NS 16  
 DS 2  
 SWH 11904.762 Hz  
 FIDRES 0.363304 Hz  
 AQ 2.7525120 sec  
 RG 32  
 DW 42.000 usec  
 DE 18.78 usec  
 TE 298.0 K  
 D1 1.00000000 sec  
 TD0 1  
 SFO1 600.1337058 MHz  
 NUC1 1H  
 P0 4.33 usec  
 P1 13.00 usec  
 PLW1 21.26799965 W

F2 - Processing parameters  
 SI 65536  
 SF 600.1300246 MHz  
 WDW EM  
 SSB 0  
 LB 0.30 Hz  
 GB 0  
 PC 1.00

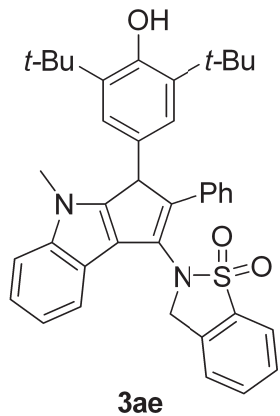

152.74  
151.27  
142.74  
140.75  
136.11  
135.58  
134.38  
133.69  
132.69  
129.94  
129.18  
128.46  
127.98  
126.71  
125.62  
124.84  
124.54  
121.84  
120.92  
120.75  
120.16  
120.00  
118.06  
109.55  
77.21  
77.00  
76.79

51.41  
50.75

34.26  
30.67  
30.27

Current Data Parameters  
NAME yuky2466 3ae  
EXPNO 11  
PROCNO 1

F2 - Acquisition Parameters  
Date\_ 20201128  
Time 11.01 h  
INSTRUM Avance  
PROBHD Z150368\_0010 (  
PULPROG zgpg30  
TD 65536  
SOLVENT CDC13  
NS 3000  
DS 2  
SWH 37037.035 Hz  
FIDRES 1.130281 Hz  
AQ 0.8847360 sec  
RG 101  
DW 13.500 usec  
DE 18.00 usec  
TE 298.0 K  
D1 2.00000000 sec  
D11 0.03000000 sec  
TD0 1  
SFO1 150.9194079 MHz  
NUC1 13C  
P0 3.33 usec  
P1 10.00 usec  
PLW1 66.87999725 W  
SFO2 600.1324005 MHz  
NUC2 1H  
CPDPRG[2] waltz65  
PCPD2 80.00 usec  
PLW2 21.26799965 W  
PLW12 0.56160998 W  
PLW13 0.28204000 W

F2 - Processing parameters  
SI 32768  
SF 150.9028157 MHz  
WDW EM  
SSB 0  
LB 1.00 Hz  
GB 0  
PC 1.40

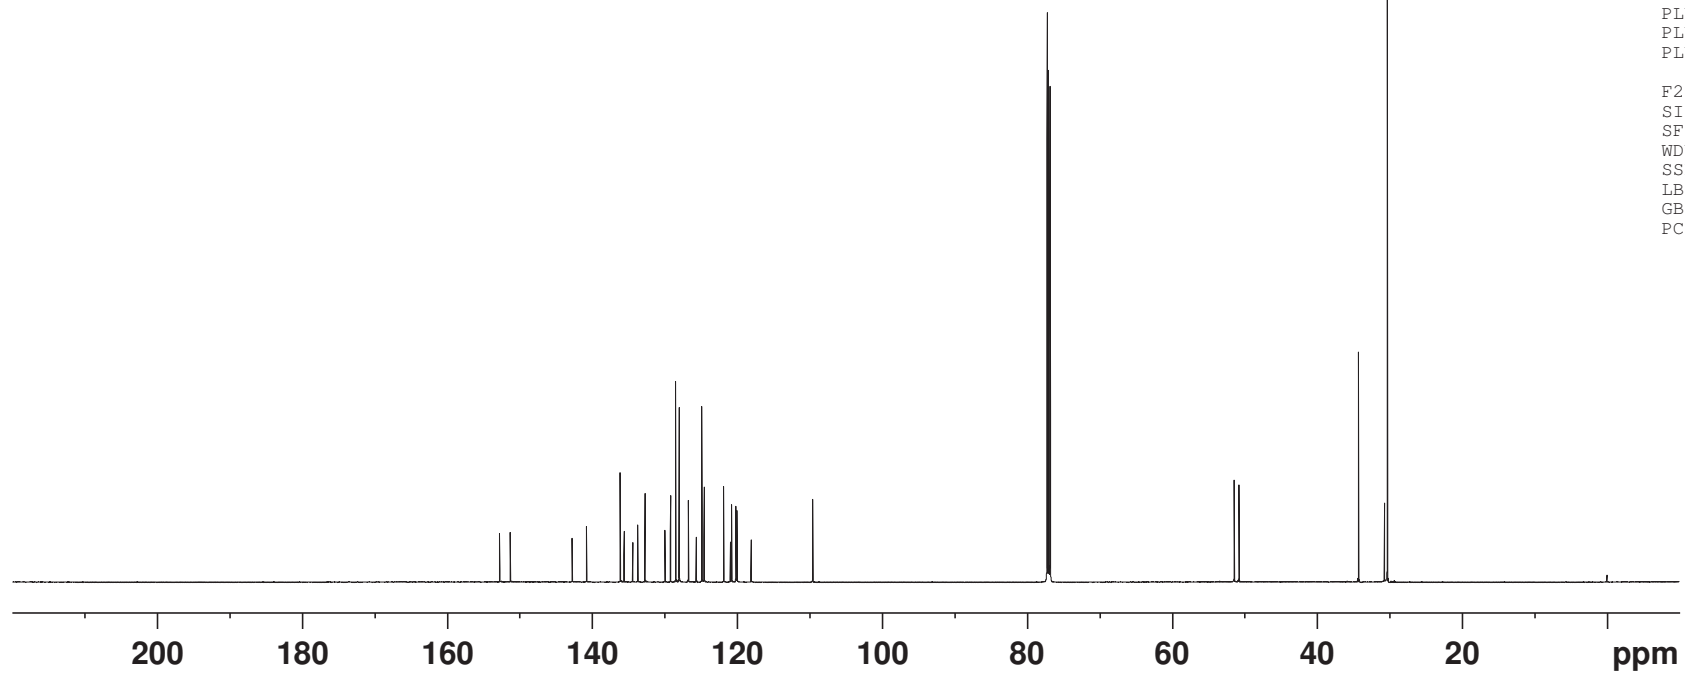

7.671  
7.659  
7.657  
7.270  
7.268  
7.256  
7.228  
7.220  
7.187  
7.185  
7.175  
7.173  
7.163  
7.161  
7.149  
7.142  
7.135  
7.127  
7.120  
6.899  
5.042  
4.773  
4.445  
4.443  
4.433  
4.430  
4.418  
4.416  
3.780  
3.766  
3.754  
3.752  
3.740  
3.687  
3.673  
3.660  
3.646  
3.537

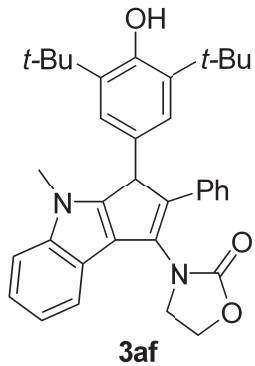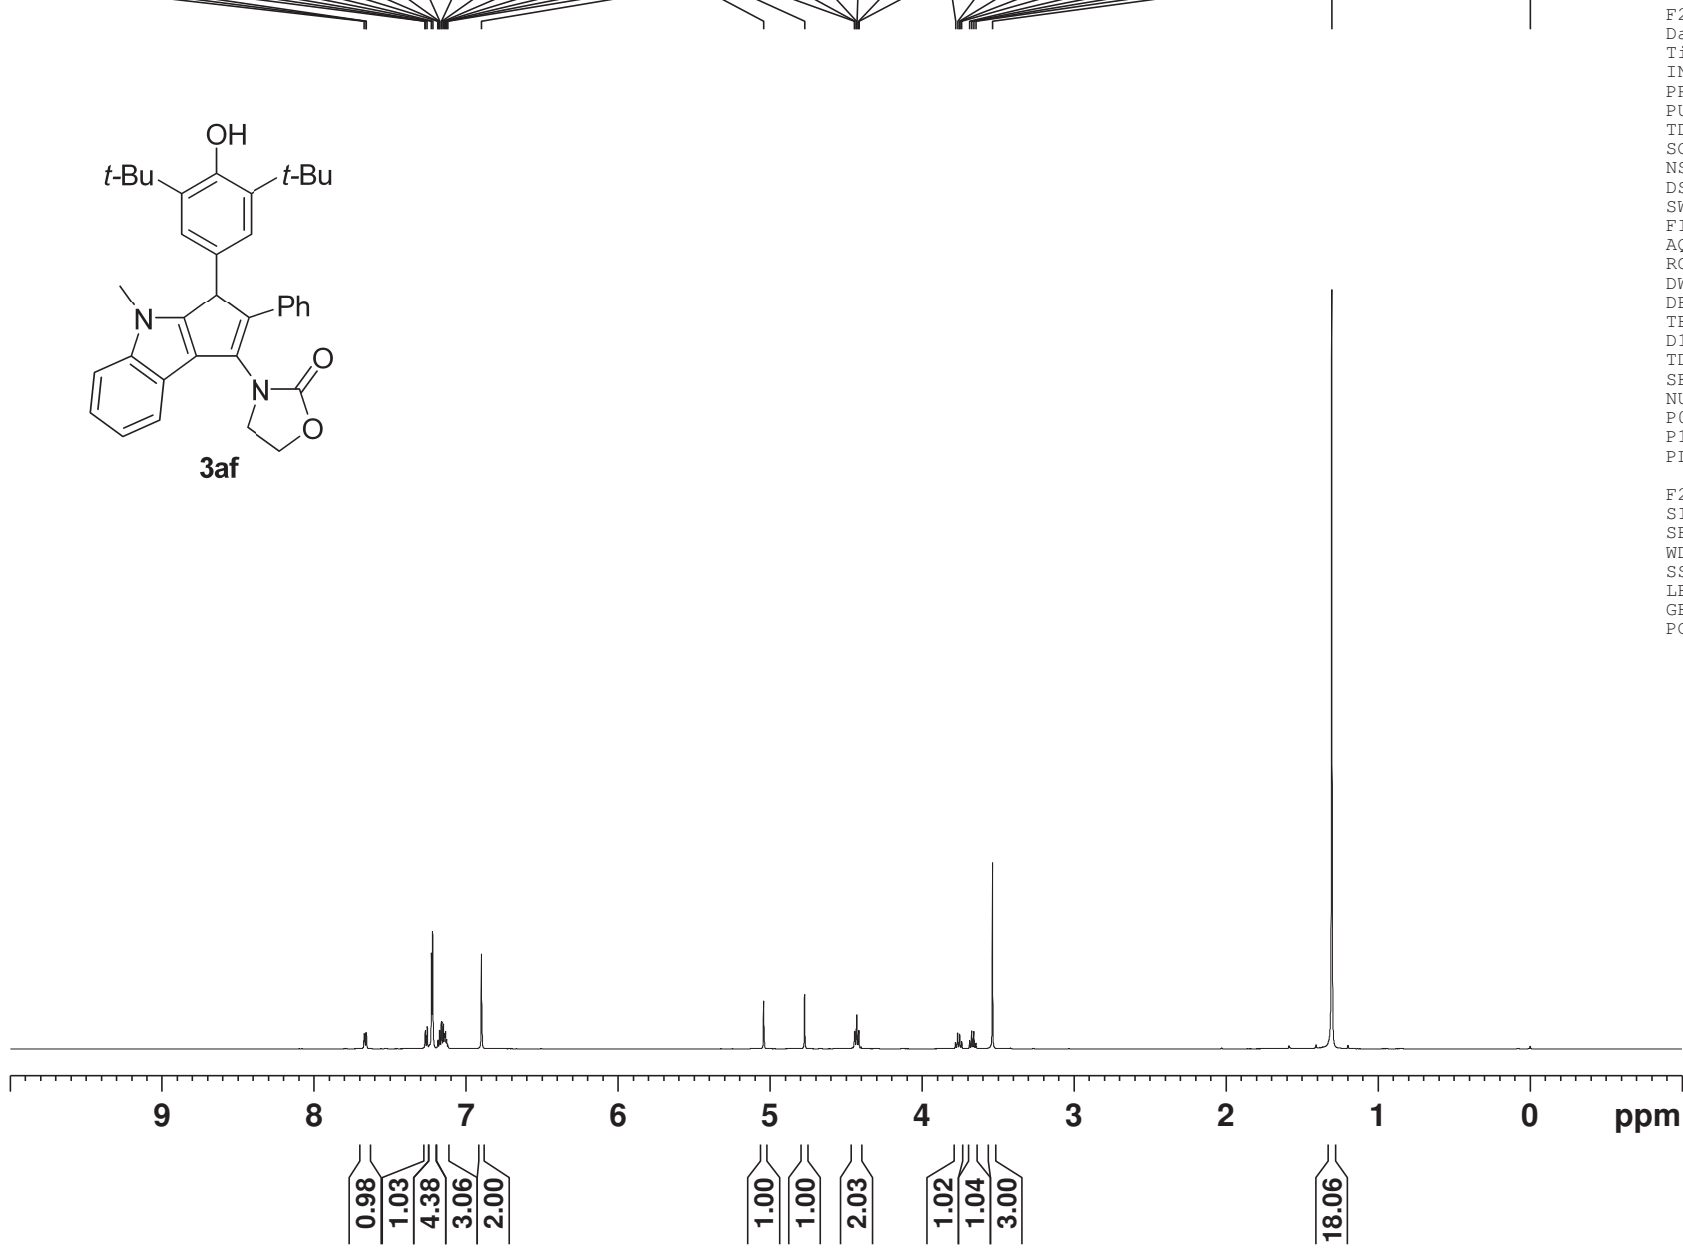

Current Data Parameters  
NAME yuky2500 3af  
EXPNO 13  
PROCNO 1

F2 - Acquisition Parameters  
Date\_ 20201221  
Time 18.33 h  
INSTRUM Avance  
PROBHD z168773\_0004 (  
PULPROG zg30  
TD 65536  
SOLVENT CDCl3  
NS 16  
DS 2  
SWH 11904.762 Hz  
FIDRES 0.363304 Hz  
AQ 2.7525120 sec  
RG 36.0421  
DW 42.000 usec  
DE 13.73 usec  
TE 298.1 K  
D1 1.00000000 sec  
TD0 1  
SFO1 600.1337058 MHz  
NUC1 1H  
P0 3.94 usec  
P1 11.82 usec  
PLW1 31.62299919 W

F2 - Processing parameters  
SI 65536  
SF 600.1300332 MHz  
WDW EM  
SSB 0  
LB 0.30 Hz  
GB 0  
PC 1.00

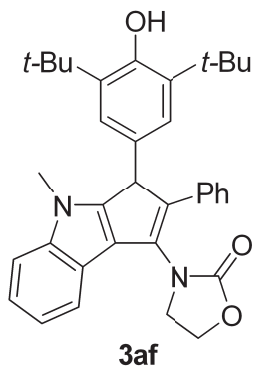

156.70  
152.72  
150.93  
140.73  
136.04  
135.26  
134.30  
132.25  
128.29  
128.13  
126.46  
125.71  
124.88  
120.87  
120.77  
120.20  
120.04  
117.59  
109.55

77.21  
77.00  
76.79

62.84

50.83  
45.85

34.21  
30.68  
30.23

Current Data Parameters  
NAME yuky2500 3af  
EXPNO 14  
PROCNO 1

F2 - Acquisition Parameters  
Date\_ 20201221  
Time 19.47 h  
INSTRUM Avance  
PROBHD Z168773\_0004 (  
PULPROG zgpg30  
TD 65536  
SOLVENT CDC13  
NS 1500  
DS 4  
SWH 37037.035 Hz  
FIDRES 1.130281 Hz  
AQ 0.8847360 sec  
RG 101  
DW 13.500 usec  
DE 18.00 usec  
TE 298.1 K  
D1 2.00000000 sec  
D11 0.03000000 sec  
TD0 1  
SFO1 150.9194079 MHz  
NUC1 13C  
P0 6.13 usec  
P1 18.38 usec  
PLW1 76.86299896 W  
SFO2 600.1324005 MHz  
NUC2 1H  
CPDPRG[2] waltz65  
PCPD2 70.00 usec  
PLW2 31.62299919 W  
PLW12 0.94957000 W  
PLW13 0.47762999 W

F2 - Processing parameters  
SI 32768  
SF 150.9028250 MHz  
WDW EM  
SSB 0  
LB 1.00 Hz  
GB 0  
PC 1.40

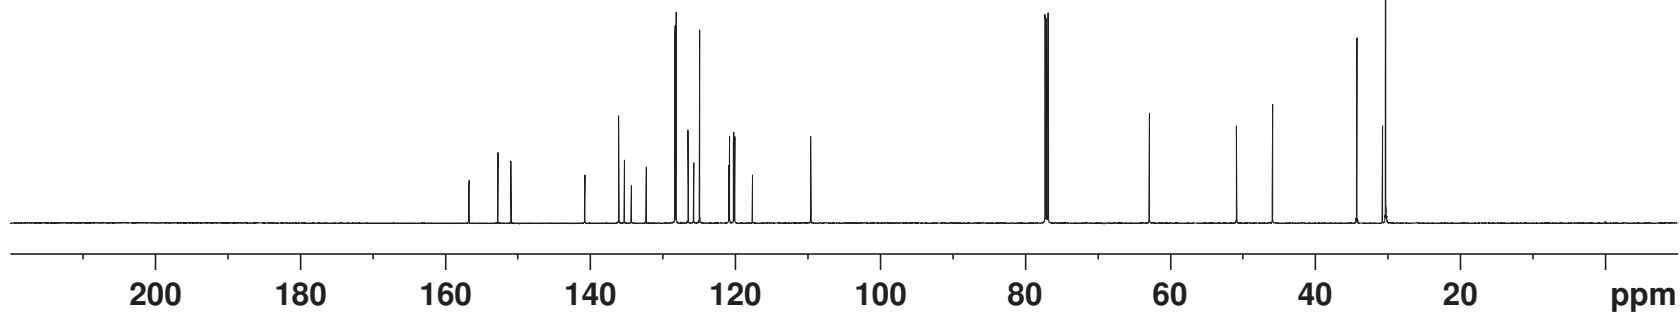

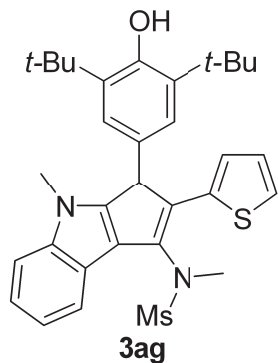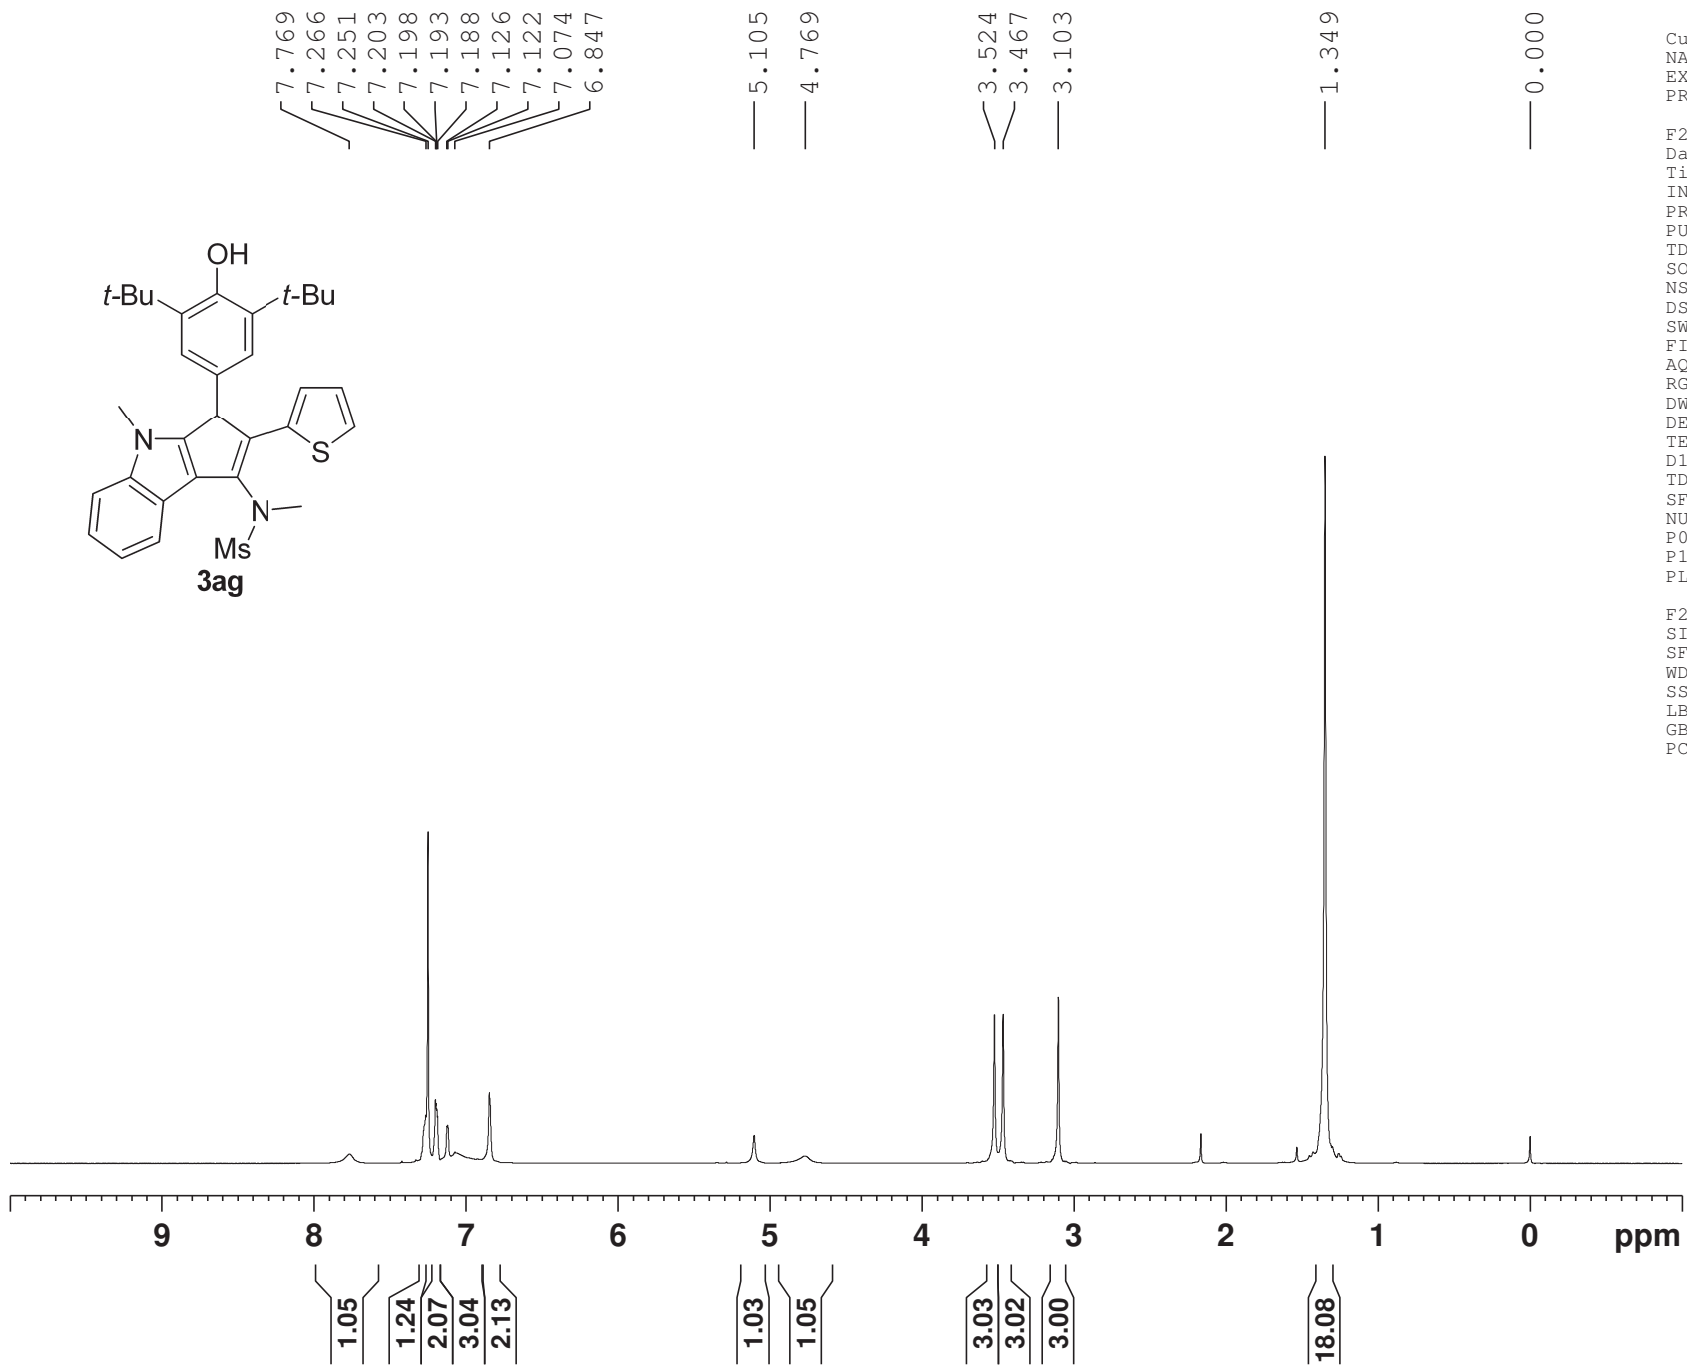

Current Data Parameters  
 NAME yuky2470-2 3ag  
 EXPNO 10  
 PROCNO 1

F2 - Acquisition Parameters  
 Date\_ 20201203  
 Time 22.23 h  
 INSTRUM Avance  
 PROBHD z150368\_0010 (  
 PULPROG zg30  
 TD 65536  
 SOLVENT CDCl3  
 NS 16  
 DS 2  
 SWH 11904.762 Hz  
 FIDRES 0.363304 Hz  
 AQ 2.7525120 sec  
 RG 32  
 DW 42.000 usec  
 DE 18.78 usec  
 TE 298.0 K  
 D1 1.00000000 sec  
 TD0 1  
 SFO1 600.1337058 MHz  
 NUC1 1H  
 P0 4.33 usec  
 P1 13.00 usec  
 PLW1 21.26799965 W

F2 - Processing parameters  
 SI 65536  
 SF 600.1300200 MHz  
 WDW EM  
 SSB 0  
 LB 0.30 Hz  
 GB 0  
 PC 1.00



152.98  
151.78  
140.84  
137.01  
136.51  
135.15  
133.77  
126.38  
124.82  
124.60  
124.29  
120.91  
120.35  
119.75  
116.68  
109.94

77.21  
77.00  
76.79

50.61  
38.92  
36.12  
34.32  
30.60  
30.29

Current Data Parameters  
NAME yuky2470-2 3ag  
EXPNO 11  
PROCNO 1

F2 - Acquisition Parameters  
Date\_ 20201204  
Time 2.29 h  
INSTRUM Avance  
PROBHD Z150368\_0010 (  
PULPROG zgpg30  
TD 65536  
SOLVENT CDC13  
NS 5000  
DS 2  
SWH 37037.035 Hz  
FIDRES 1.130281 Hz  
AQ 0.8847360 sec  
RG 101  
DW 13.500 usec  
DE 18.00 usec  
TE 298.0 K  
D1 2.00000000 sec  
D11 0.03000000 sec  
TD0 1  
SFO1 150.9194079 MHz  
NUC1 13C  
P0 3.33 usec  
P1 10.00 usec  
PLW1 66.87999725 W  
SFO2 600.1324005 MHz  
NUC2 1H  
CPDPRG[2] waltz65  
PCPD2 80.00 usec  
PLW2 21.26799965 W  
PLW12 0.56160998 W  
PLW13 0.28204000 W

F2 - Processing parameters  
SI 32768  
SF 150.9028139 MHz  
WDW EM  
SSB 0  
LB 1.00 Hz  
GB 0  
PC 1.40

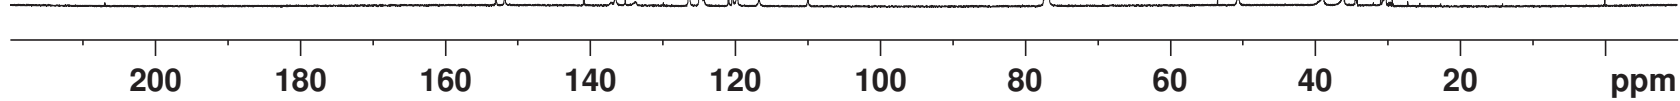

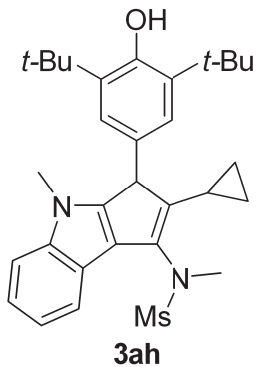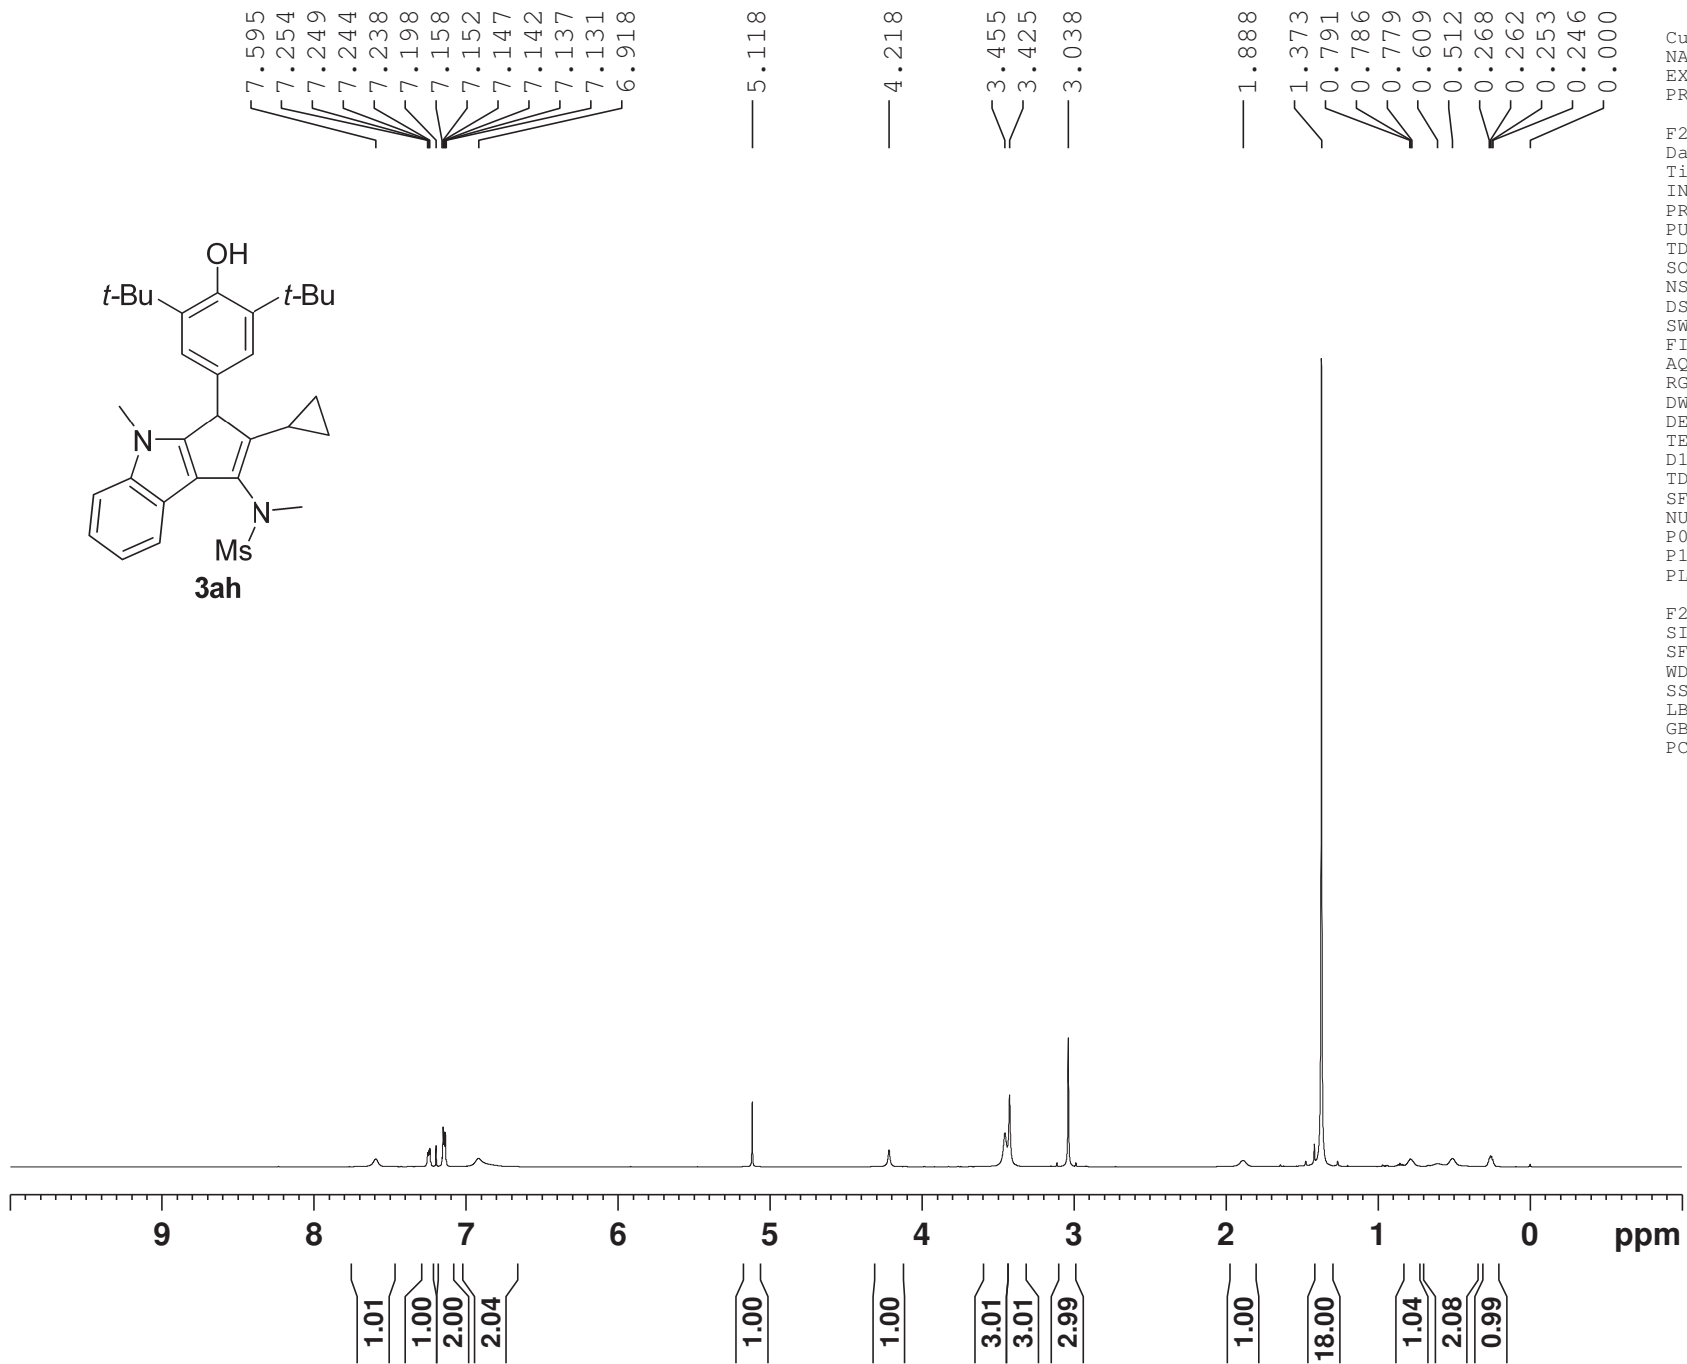

Current Data Parameters  
 NAME yuky2497 3ah  
 EXPNO 10  
 PROCNO 1

F2 - Acquisition Parameters  
 Date\_ 20201217  
 Time 12.06 h  
 INSTRUM Avance  
 PROBHD z168773\_0004 (  
 PULPROG zg30  
 TD 65536  
 SOLVENT CDCl3  
 NS 4  
 DS 2  
 SWH 11904.762 Hz  
 FIDRES 0.363304 Hz  
 AQ 2.7525120 sec  
 RG 16.3897  
 DW 42.000 usec  
 DE 13.73 usec  
 TE 298.0 K  
 D1 1.00000000 sec  
 TD0 1  
 SFO1 600.1337058 MHz  
 NUC1 1H  
 P0 3.94 usec  
 P1 11.82 usec  
 PLW1 31.62299919 W

F2 - Processing parameters  
 SI 65536  
 SF 600.1300511 MHz  
 WDW EM  
 SSB 0  
 LB 0.30 Hz  
 GB 0  
 PC 1.00



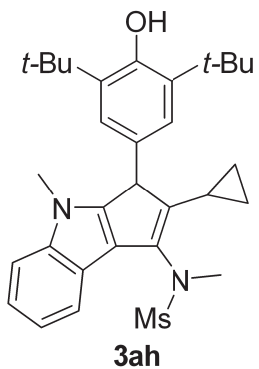

152.73  
150.38  
144.09  
140.32  
136.26  
134.10  
125.82  
124.48  
120.12  
119.72  
118.91  
116.07  
109.83

77.21  
77.00  
76.79

49.49  
37.84  
36.85  
34.20  
30.46  
30.23

10.36  
7.28  
5.82

Current Data Parameters  
NAME yuky2497 3ah  
EXPNO 13  
PROCNO 1

F2 - Acquisition Parameters  
Date\_ 20201217  
Time 12.28 h  
INSTRUM Avance  
PROBHD Z168773\_0004 (  
PULPROG zgpg30  
TD 65536  
SOLVENT CDC13  
NS 129  
DS 4  
SWH 37037.035 Hz  
FIDRES 1.130281 Hz  
AQ 0.8847360 sec  
RG 101  
DW 13.500 usec  
DE 18.00 usec  
TE 298.0 K  
D1 2.00000000 sec  
D11 0.03000000 sec  
TD0 1  
SFO1 150.9194079 MHz  
NUC1 13C  
P0 6.13 usec  
P1 18.38 usec  
PLW1 76.86299896 W  
SFO2 600.1324005 MHz  
NUC2 1H  
CPDPRG[2] waltz65  
PCPD2 70.00 usec  
PLW2 31.62299919 W  
PLW12 0.94957000 W  
PLW13 0.47762999 W

F2 - Processing parameters  
SI 32768  
SF 150.9028374 MHz  
WDW EM  
SSB 0  
LB 1.00 Hz  
GB 0  
PC 1.40

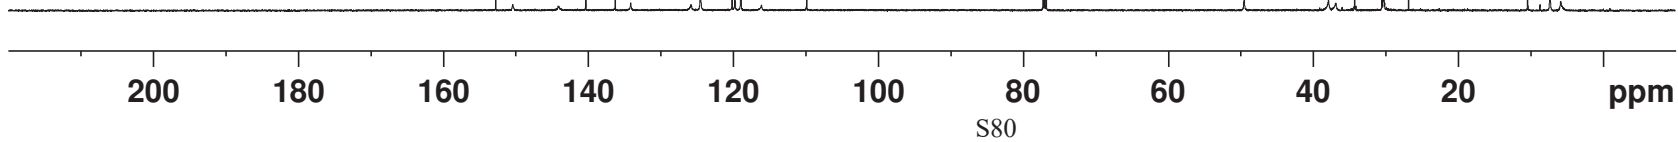

7.620  
7.611  
7.606  
7.584  
7.575  
7.569  
7.278  
7.272  
7.266  
7.263  
7.214  
7.165  
7.161  
7.159  
7.156  
7.154  
7.150  
6.921  
5.123  
5.100  
4.457  
4.410  
3.483  
3.430  
3.385  
3.045  
3.015  
2.856  
2.839  
2.823  
2.819  
1.881  
1.862  
1.721  
1.588  
1.498  
1.482  
1.478  
1.372  
1.310  
1.289  
1.270  
1.266  
1.250  
1.169  
1.164  
0.887  
0.543  
0.539  
0.478  
0.474  
0.457  
0.454

Current Data Parameters  
 F2 - Acquisition Parameters  
 Date\_ 20201127  
 Time 11.07 h  
 INSTRUM Avance  
 PROBHD z168773\_0004 (  
 PULPROG zg30  
 TD 65536  
 SOLVENT CDCl3  
 NS 16  
 DS 2  
 SWH 11904.762 Hz  
 FIDRES 0.363304 Hz  
 AQ 2.7525120 sec  
 RG 18.3179  
 DW 42.000 usec  
 DE 13.73 usec  
 TE 298.1 K  
 D1 1.00000000 sec  
 TD0 1  
 SFO1 600.1337058 MHz  
 NUC1 1H  
 P0 3.94 usec  
 P1 11.82 usec  
 PLW1 31.62299919 W  
 F2 - Processing parameters  
 SI 65536  
 SF 600.1300415 MHz  
 WDW EM  
 SSB 0  
 LB 0.30 Hz  
 GB 0  
 PC 1.00

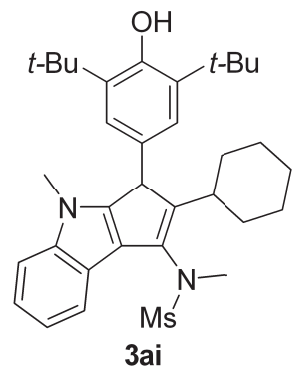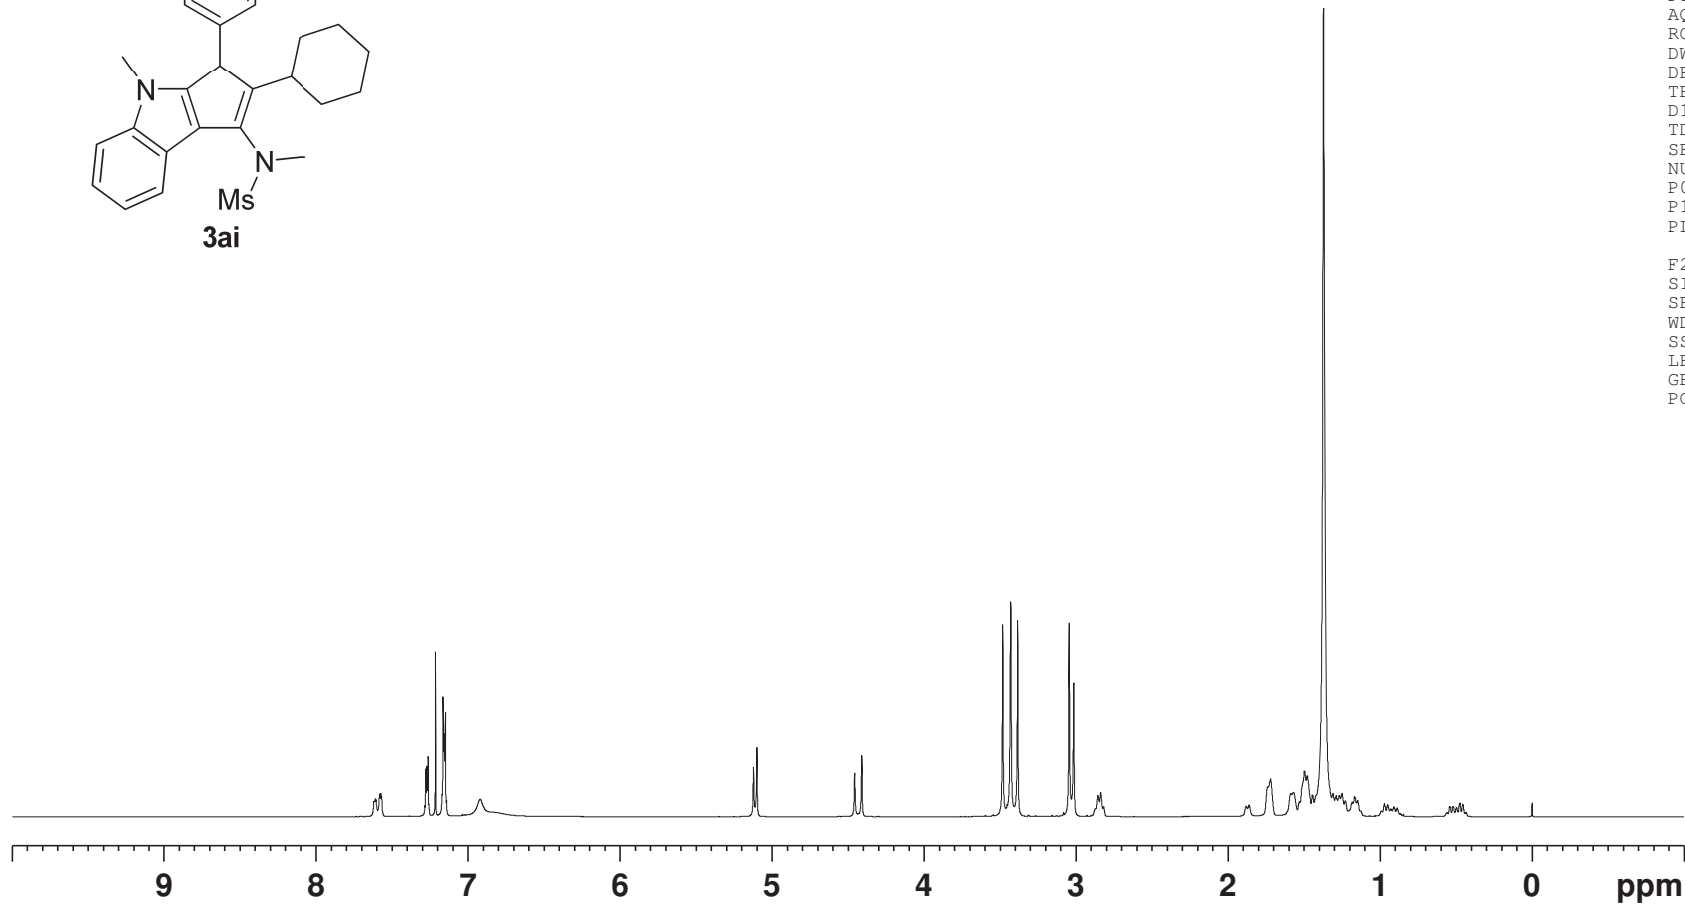

1.88  
1.88  
3.75  
3.62  
0.86  
1.00  
0.86  
1.02  
3.05  
5.15  
3.01  
3.00  
2.57  
1.88  
0.87  
2.88  
2.06  
5.15  
33.51  
2.08  
1.86  
1.97  
1.87

S81

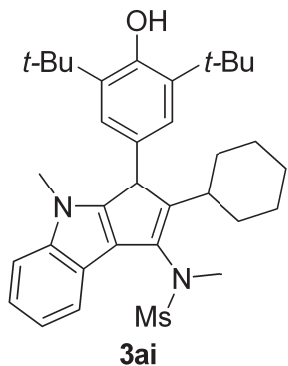

152.84  
152.77  
151.53  
150.96  
149.73  
149.41  
140.42  
140.33  
136.17  
131.95  
131.86  
126.38  
126.01  
124.85  
120.10  
120.07  
119.92  
119.84  
119.75  
119.61  
118.97  
118.80  
116.07  
115.50  
109.91

77.21  
77.00  
76.79

48.84  
48.61  
38.65  
38.21  
38.11  
37.90  
37.76  
37.37  
34.69  
34.22  
32.84  
32.26  
31.24  
30.49  
30.46  
30.27  
27.08  
26.98  
26.92  
26.25  
26.15

Current Data Parameters  
NAME yuky2469-1 3ai  
EXPNO 11  
PROCNO 1

F2 - Acquisition Parameters  
Date\_ 20201127  
Time 14.04 h  
INSTRUM Avance  
PROBHD Z168773\_0004 (  
PULPROG zgpg30  
TD 65536  
SOLVENT CDCl3  
NS 3600  
DS 4  
SWH 37037.035 Hz  
FIDRES 1.130281 Hz  
AQ 0.8847360 sec  
RG 101  
DW 13.500 usec  
DE 18.00 usec  
TE 298.0 K  
D1 2.00000000 sec  
D11 0.03000000 sec  
TD0 1  
SFO1 150.9194079 MHz  
NUC1 13C  
P0 6.13 usec  
P1 18.38 usec  
PLW1 76.86299896 W  
SFO2 600.1324005 MHz  
NUC2 1H  
CPDPRG[2] waltz65  
PCPD2 70.00 usec  
PLW2 31.62299919 W  
PLW12 0.94957000 W  
PLW13 0.47762999 W

F2 - Processing parameters  
SI 32768  
SF 150.9028302 MHz  
WDW EM  
SSB 0  
LB 1.00 Hz  
GB 0  
PC 1.40

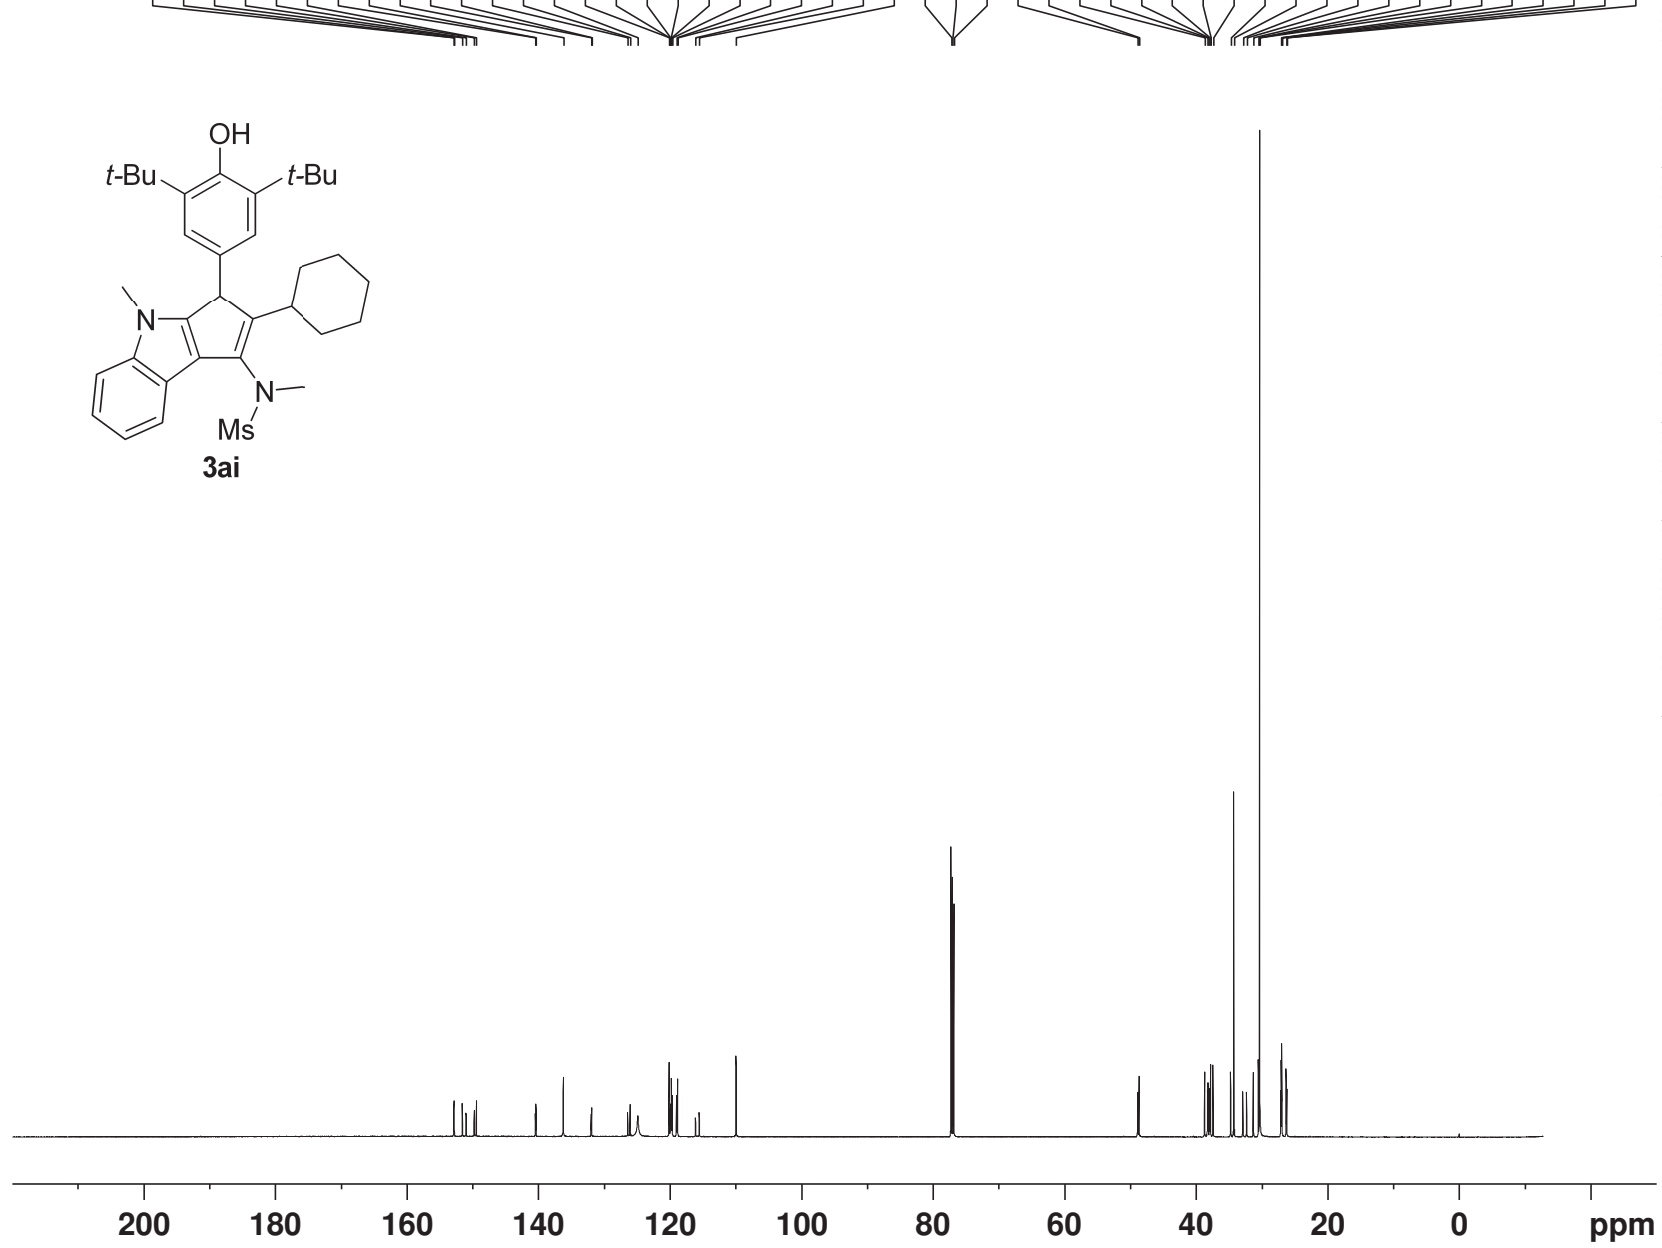

7.685  
7.673  
7.619  
7.237  
7.172  
7.157  
7.109  
7.096  
7.084  
7.028  
7.017  
7.005  
6.917  
6.905  
6.893  
6.869  
6.855  
6.768  
6.755  
6.694  
6.631  
6.619  
6.521  
4.967  
4.589

3.890  
3.498  
3.408

2.398

1.237

0.000

Current Data Parameters  
NAME yukyl888 3ca  
EXPNO 10  
PROCNO 1

F2 - Acquisition Parameters  
Date\_ 20201116  
Time 15.57 h  
INSTRUM Avance  
PROBHD z168773\_0004 (  
PULPROG zg30  
TD 65536  
SOLVENT CDCl3  
NS 16  
DS 2  
SWH 11904.762 Hz  
FIDRES 0.363304 Hz  
AQ 2.7525120 sec  
RG 47.619  
DW 42.000 usec  
DE 13.73 usec  
TE 298.1 K  
D1 1.00000000 sec  
TD0 1  
SFO1 600.1337058 MHz  
NUC1 1H  
P0 3.94 usec  
P1 11.82 usec  
PLW1 31.62299919 W

F2 - Processing parameters  
SI 65536  
SF 600.1300282 MHz  
WDW EM  
SSB 0  
LB 0.30 Hz  
GB 0  
PC 1.00

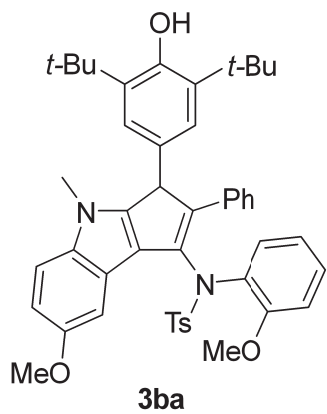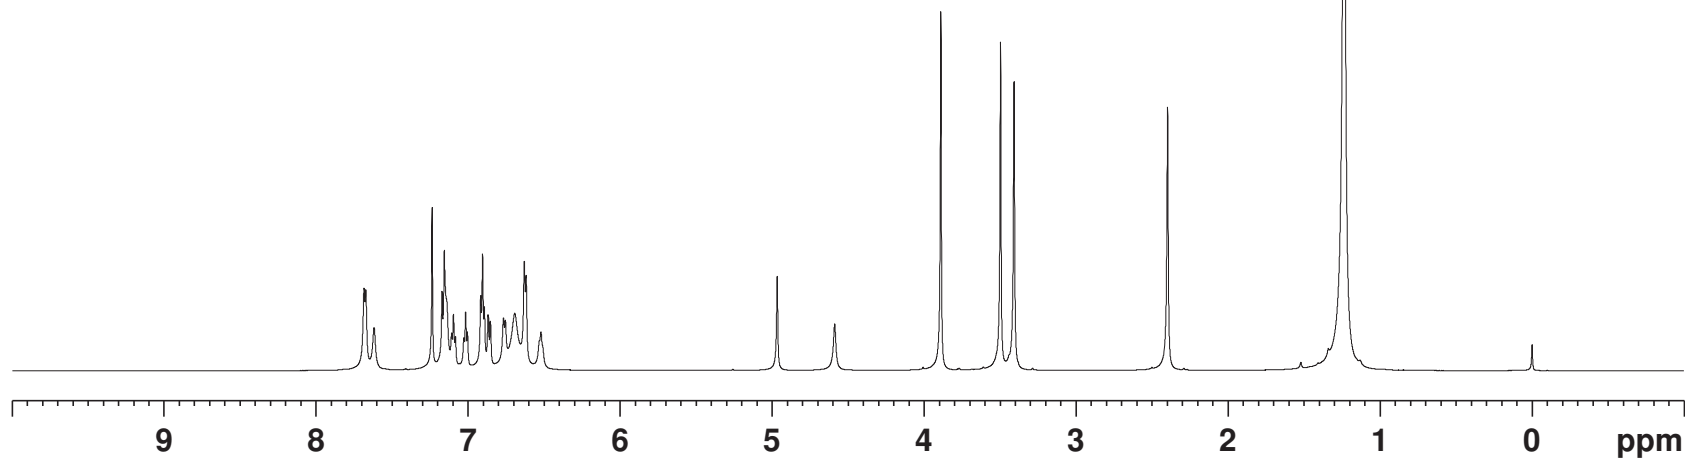

2.01  
0.98  
3.04  
1.07  
1.05  
2.07  
1.05  
6.08  
1.03

1.01  
0.99

3.01  
3.01  
3.00

3.00

18.07

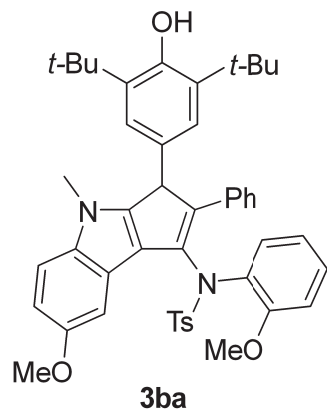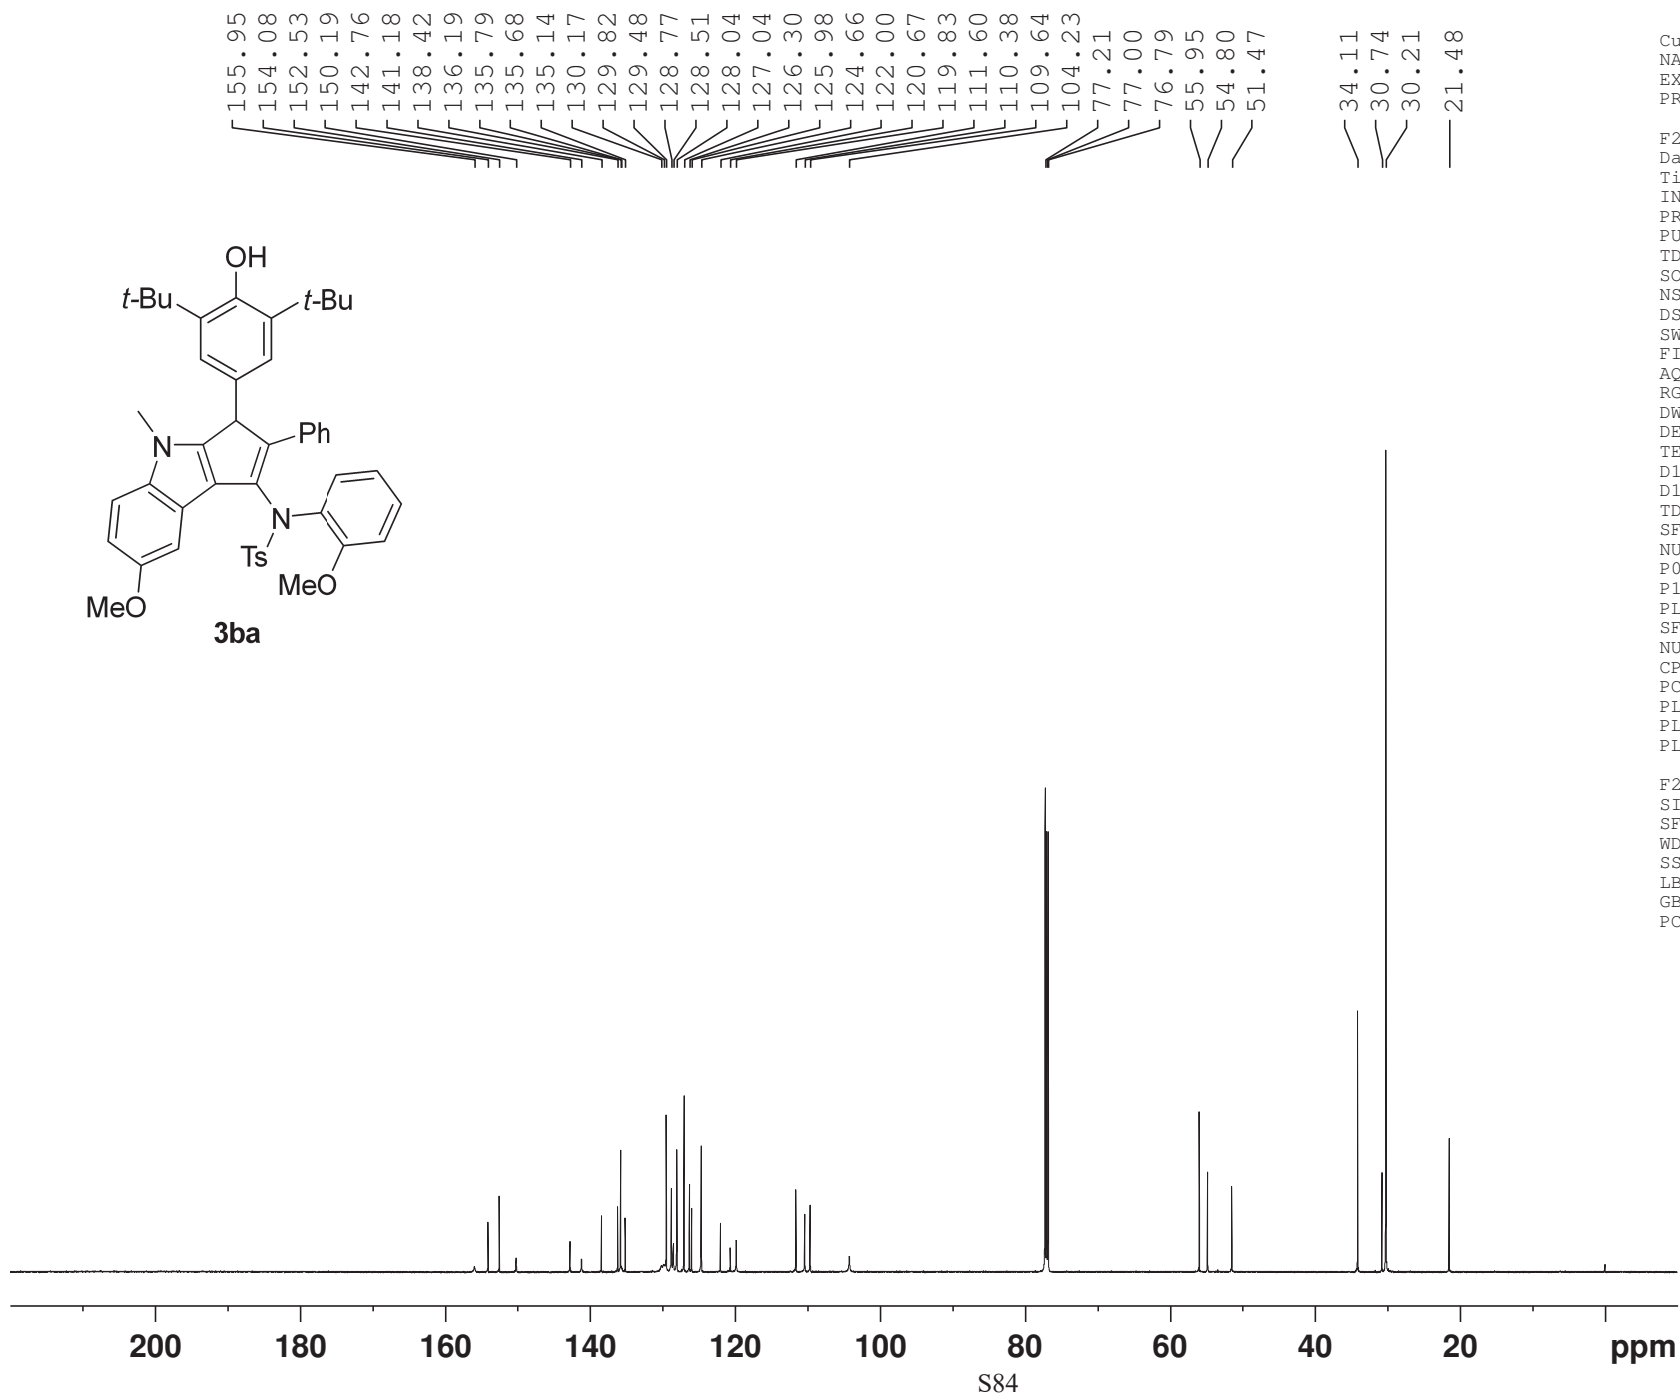

Current Data Parameters  
 NAME yukyl888 3ca  
 EXPNO 11  
 PROCNO 1

F2 - Acquisition Parameters  
 Date\_ 20201116  
 Time 18.54 h  
 INSTRUM Avance  
 PROBHD Z168773\_0004 (  
 PULPROG zgpg30  
 TD 65536  
 SOLVENT CDCl3  
 NS 3600  
 DS 4  
 SWH 37037.035 Hz  
 FIDRES 1.130281 Hz  
 AQ 0.8847360 sec  
 RG 101  
 DW 13.500 usec  
 DE 18.00 usec  
 TE 298.1 K  
 D1 2.00000000 sec  
 D11 0.03000000 sec  
 TD0 1  
 SFO1 150.9194079 MHz  
 NUC1 13C  
 P0 6.13 usec  
 P1 18.38 usec  
 PLW1 76.86299896 W  
 SFO2 600.1324005 MHz  
 NUC2 1H  
 CPDPRG[2] waltz65  
 PCPD2 70.00 usec  
 PLW2 31.62299919 W  
 PLW12 0.94957000 W  
 PLW13 0.47762999 W

F2 - Processing parameters  
 SI 32768  
 SF 150.9028192 MHz  
 WDW EM  
 SSB 0  
 LB 1.00 Hz  
 GB 0  
 PC 1.40

7.662  
7.649  
7.429  
7.230  
7.157  
7.143  
7.116  
7.114  
7.102  
7.090  
7.088  
7.069  
7.057  
7.045  
7.001  
6.987  
6.970  
6.775  
6.754  
6.741  
6.559  
6.547  
6.535  
4.959  
4.582

3.489  
3.366

2.422  
2.410

1.243

0.000

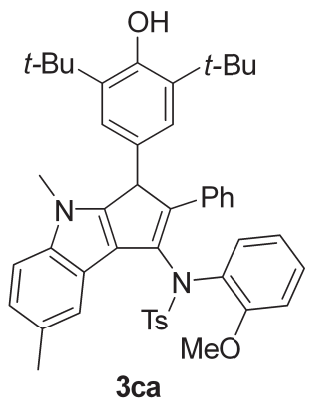

Current Data Parameters  
NAME yuky2468 3da  
EXPNO 10  
PROCNO 1

F2 - Acquisition Parameters  
Date\_ 20201128  
Time 11.32 h  
INSTRUM Avance  
PROBHD z150368\_0010 (  
PULPROG zg30  
TD 65536  
SOLVENT CDCl3  
NS 16  
DS 2  
SWH 11904.762 Hz  
FIDRES 0.363304 Hz  
AQ 2.7525120 sec  
RG 32  
DW 42.000 usec  
DE 18.78 usec  
TE 298.0 K  
D1 1.00000000 sec  
TD0 1  
SFO1 600.1337058 MHz  
NUC1 1H  
P0 4.33 usec  
P1 13.00 usec  
PLW1 21.26799965 W

F2 - Processing parameters  
SI 65536  
SF 600.1300321 MHz  
WDW EM  
SSB 0  
LB 0.30 Hz  
GB 0  
PC 1.00

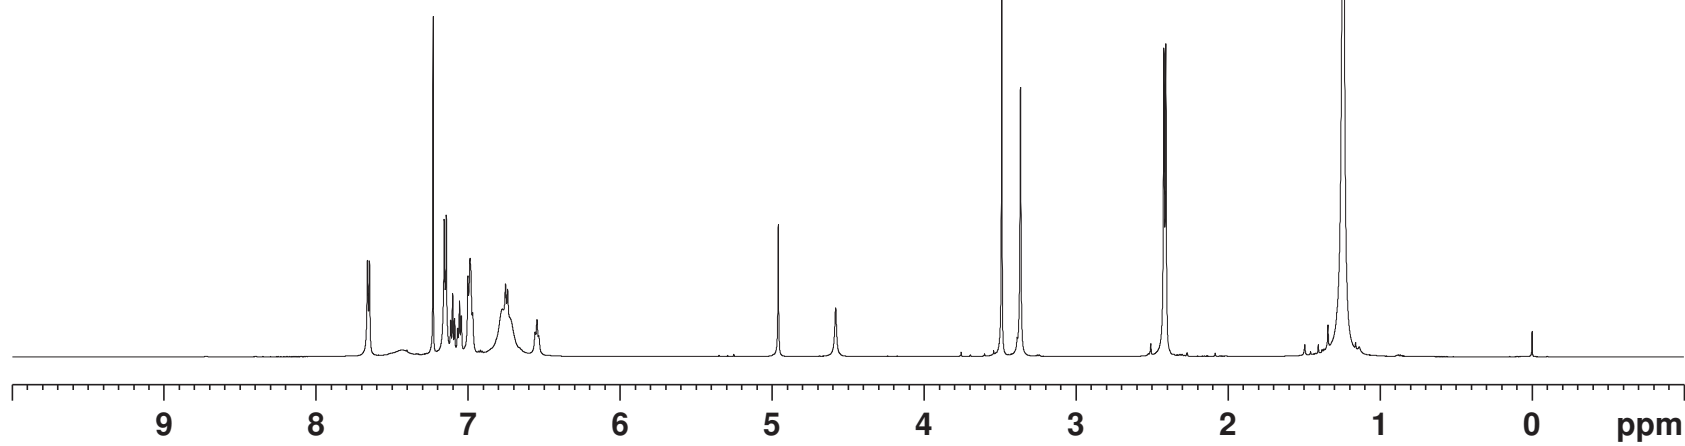

2.03  
0.99  
3.01  
1.08  
1.03  
3.01  
6.01  
1.03

1.01  
1.00

3.02  
3.01

3.01  
3.02

18.03

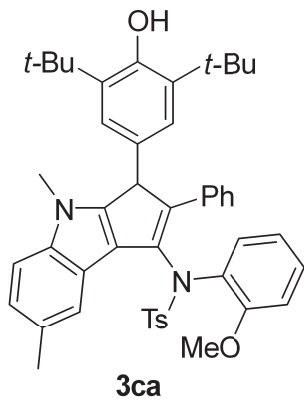

155.90  
152.52  
150.09  
142.57  
142.13  
139.20  
138.73  
135.80  
135.48  
135.22  
130.35  
130.08  
129.58  
128.77  
128.55  
128.33  
128.08  
127.16  
126.38  
125.93  
124.70  
121.82  
121.74  
121.57  
120.02  
119.93  
111.46  
108.74  
77.21  
77.00  
76.79  
54.60  
51.39  
34.12  
30.63  
30.23  
21.62  
21.51

Current Data Parameters  
NAME yuky2468 3da  
EXPNO 11  
PROCNO 1

F2 - Acquisition Parameters  
Date\_ 20201128  
Time 14.00 h  
INSTRUM Avance  
PROBHD Z150368\_0010 (  
PULPROG zgpg30  
TD 65536  
SOLVENT CDCl3  
NS 3000  
DS 2  
SWH 37037.035 Hz  
FIDRES 1.130281 Hz  
AQ 0.8847360 sec  
RG 101  
DW 13.500 usec  
DE 18.00 usec  
TE 298.0 K  
D1 2.00000000 sec  
D11 0.03000000 sec  
TD0 1  
SFO1 150.9194079 MHz  
NUC1 13C  
P0 3.33 usec  
P1 10.00 usec  
PLW1 66.87999725 W  
SFO2 600.1324005 MHz  
NUC2 1H  
CPDPRG[2] waltz65  
PCPD2 80.00 usec  
PLW2 21.26799965 W  
PLW12 0.56160998 W  
PLW13 0.28204000 W

F2 - Processing parameters  
SI 32768  
SF 150.9028194 MHz  
WDW EM  
SSB 0  
LB 1.00 Hz  
GB 0  
PC 1.40

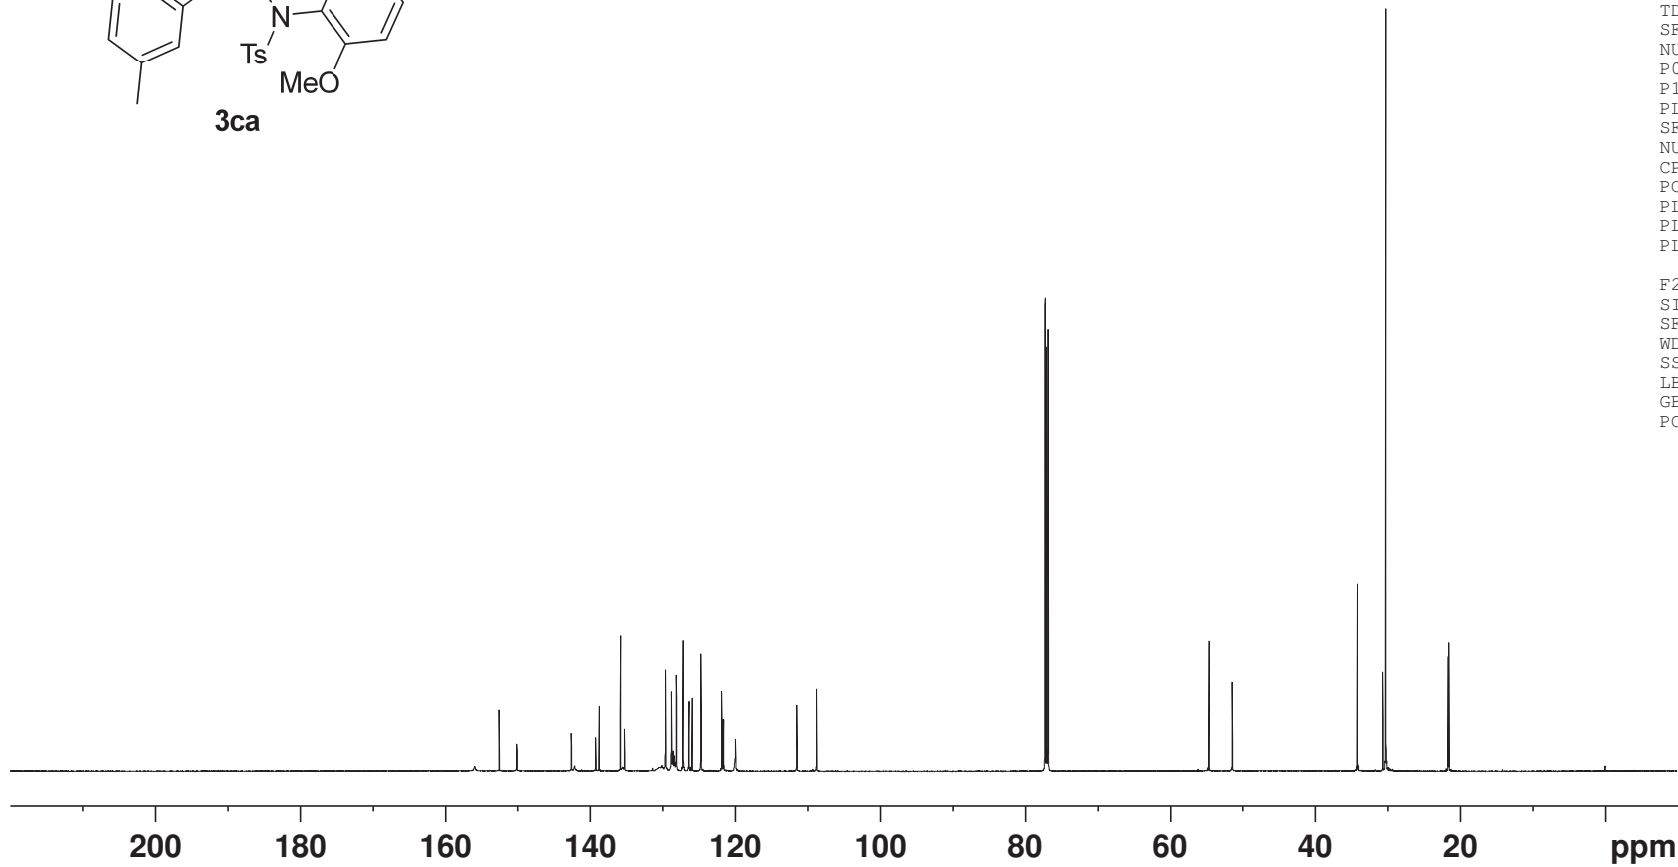

7.776  
7.672  
7.659  
7.246  
7.151  
7.140  
7.112  
7.100  
7.086  
7.074  
7.037  
7.025  
7.013  
6.983  
6.970  
6.934  
6.922  
6.909  
6.764  
6.751  
6.693  
6.661  
6.649  
6.544  
6.532  
6.520  
4.956  
4.581

3.494  
3.397

2.512  
2.412

1.236

0.000

Current Data Parameters  
NAME yukyl889 3ea  
EXPNO 10  
PROCNO 1

F2 - Acquisition Parameters  
Date\_ 20201109  
Time 15.38 h  
INSTRUM Avance  
PROBHD z168773\_0004 (  
PULPROG zg30  
TD 65536  
SOLVENT CDCl3  
NS 16  
DS 2  
SWH 11904.762 Hz  
FIDRES 0.363304 Hz  
AQ 2.7525120 sec  
RG 47.619  
DW 42.000 usec  
DE 13.73 usec  
TE 298.0 K  
D1 1.00000000 sec  
TD0 1  
SFO1 600.1337058 MHz  
NUC1 1H  
P0 3.94 usec  
P1 11.82 usec  
PLW1 31.62299919 W

F2 - Processing parameters  
SI 65536  
SF 600.1300233 MHz  
WDW EM  
SSB 0  
LB 0.30 Hz  
GB 0  
PC 1.00

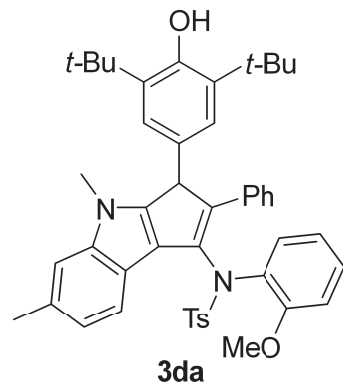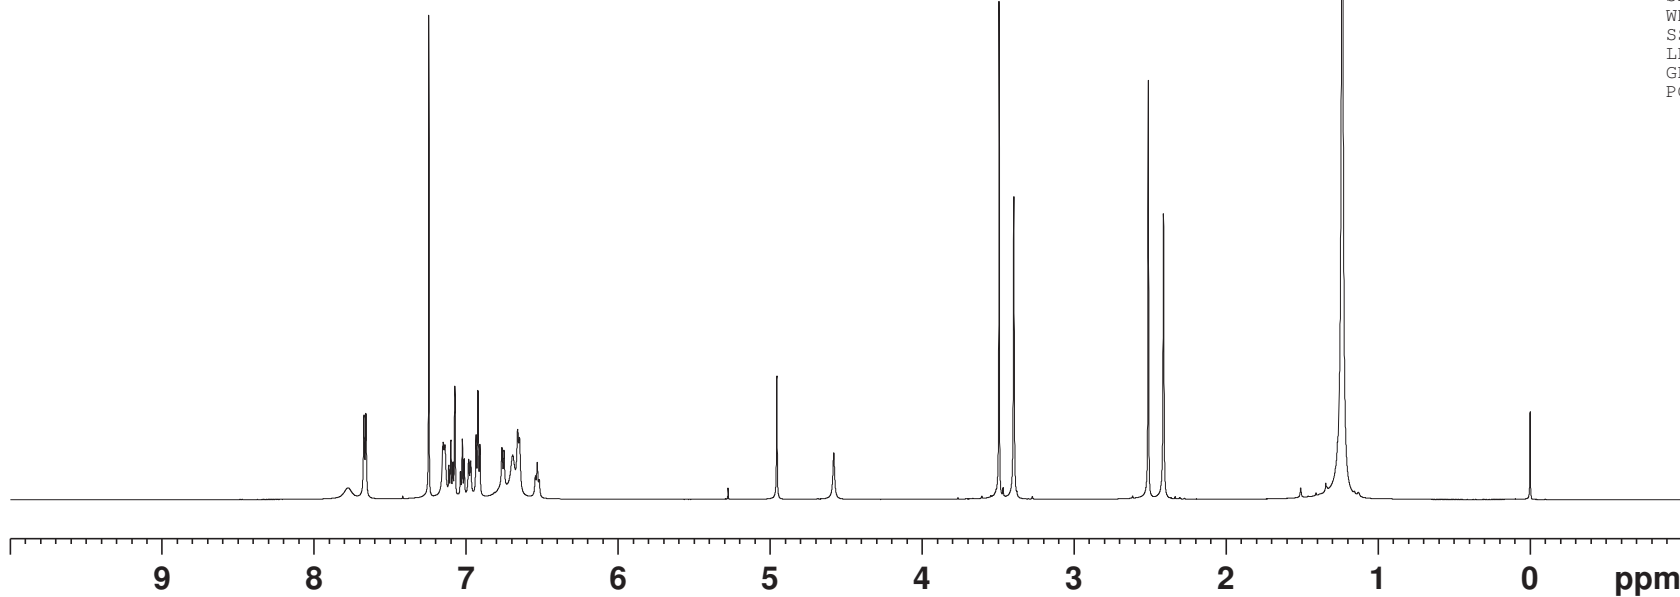

1.01  
2.04  
2.04  
1.19  
1.01  
1.13  
1.00  
2.05  
6.11  
1.05

1.00  
1.02

3.01  
3.01

3.01  
3.00

18.07

S87



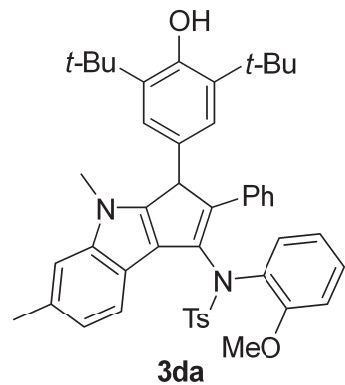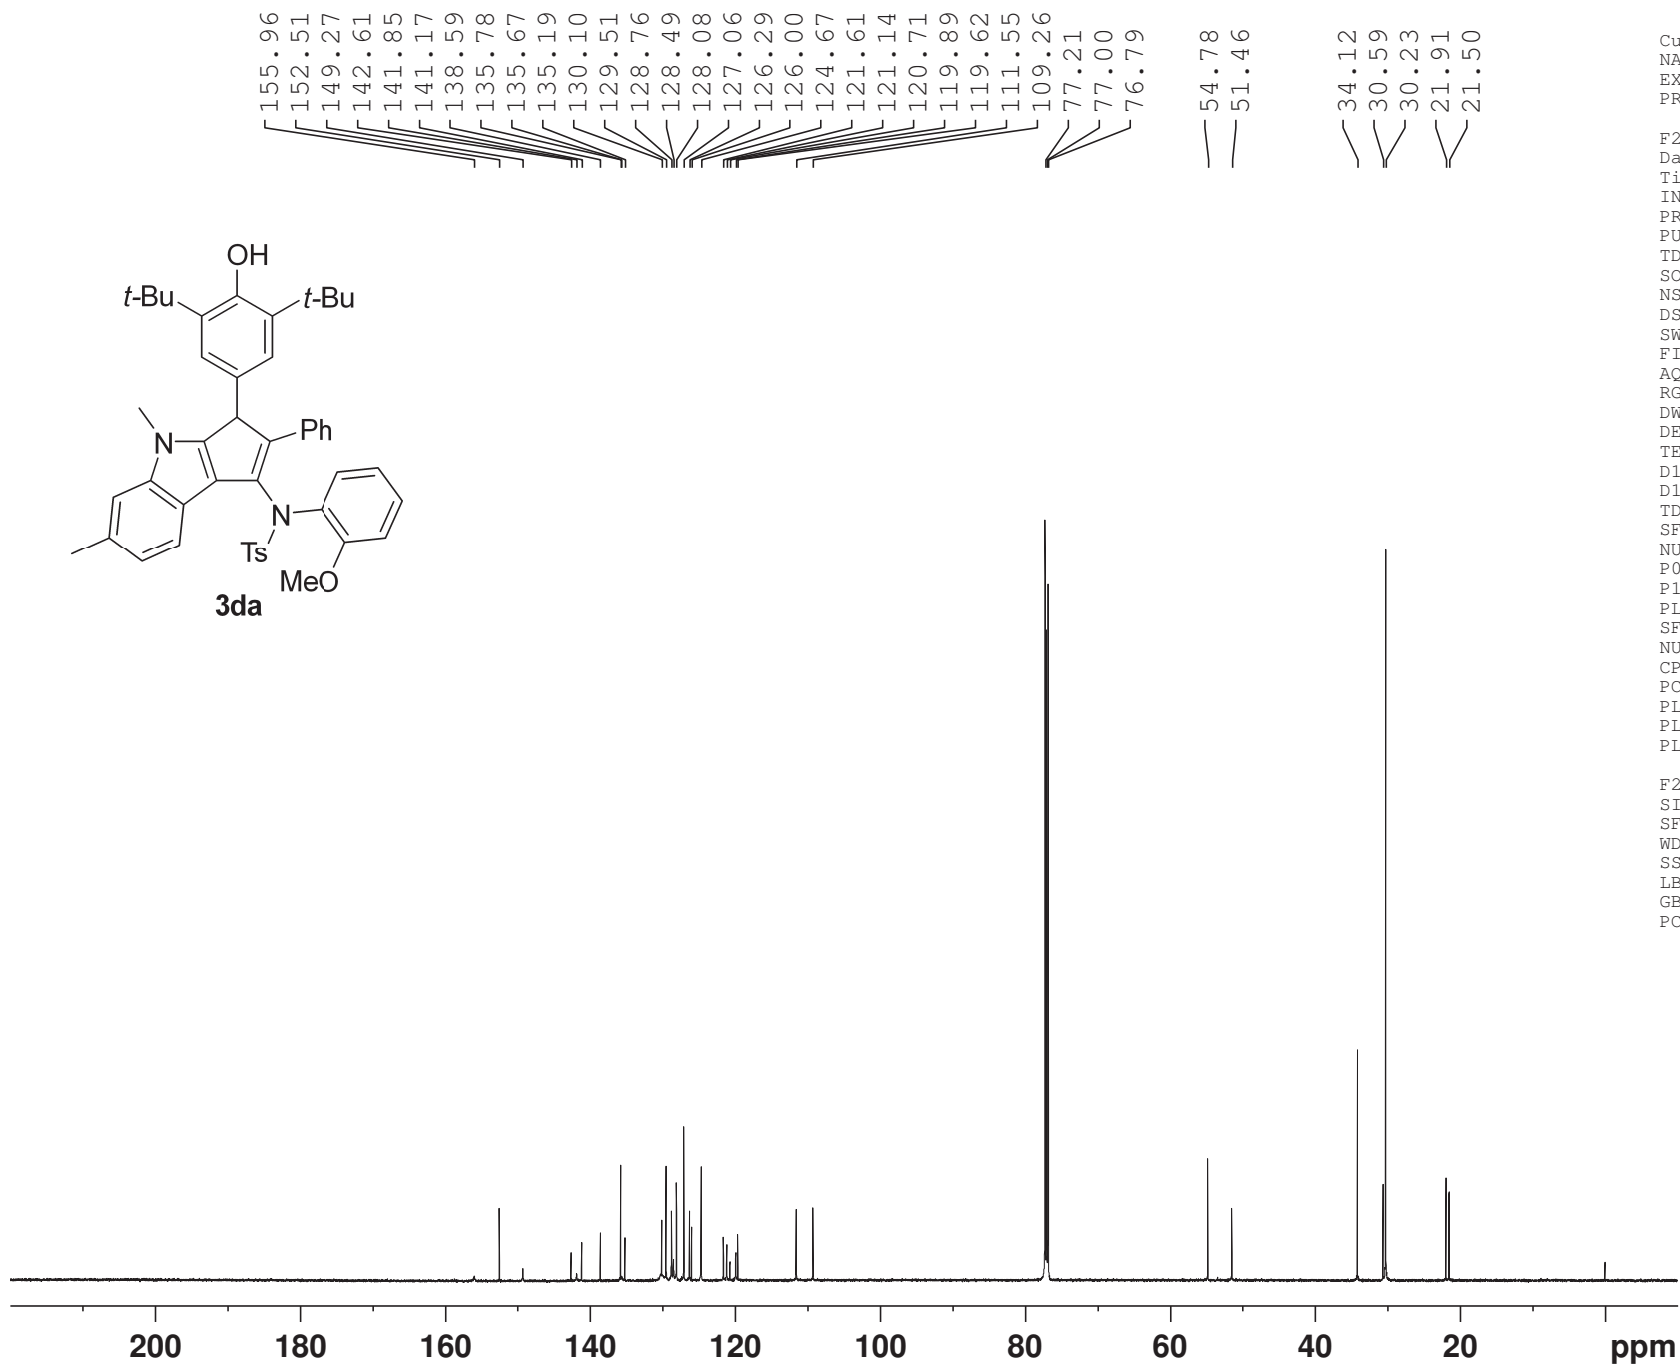

Current Data Parameters  
 NAME yukyl889 3ea  
 EXPNO 11  
 PROCNO 1

F2 - Acquisition Parameters  
 Date\_ 20201109  
 Time 17.41 h  
 INSTRUM Avance  
 PROBHD Z168773\_0004 (  
 PULPROG zgpg30  
 TD 65536  
 SOLVENT CDCl3  
 NS 2500  
 DS 4  
 SWH 37037.035 Hz  
 FIDRES 1.130281 Hz  
 AQ 0.8847360 sec  
 RG 101  
 DW 13.500 usec  
 DE 18.00 usec  
 TE 298.0 K  
 D1 2.00000000 sec  
 D11 0.03000000 sec  
 TD0 1  
 SFO1 150.9194079 MHz  
 NUC1 13C  
 P0 6.13 usec  
 P1 18.38 usec  
 PLW1 76.86299896 W  
 SFO2 600.1324005 MHz  
 NUC2 1H  
 CPDPRG[2] waltz65  
 PCPD2 70.00 usec  
 PLW2 31.62299919 W  
 PLW12 0.94957000 W  
 PLW13 0.47762999 W

F2 - Processing parameters  
 SI 32768  
 SF 150.9028151 MHz  
 WDW EM  
 SSB 0  
 LB 1.00 Hz  
 GB 0  
 PC 1.40

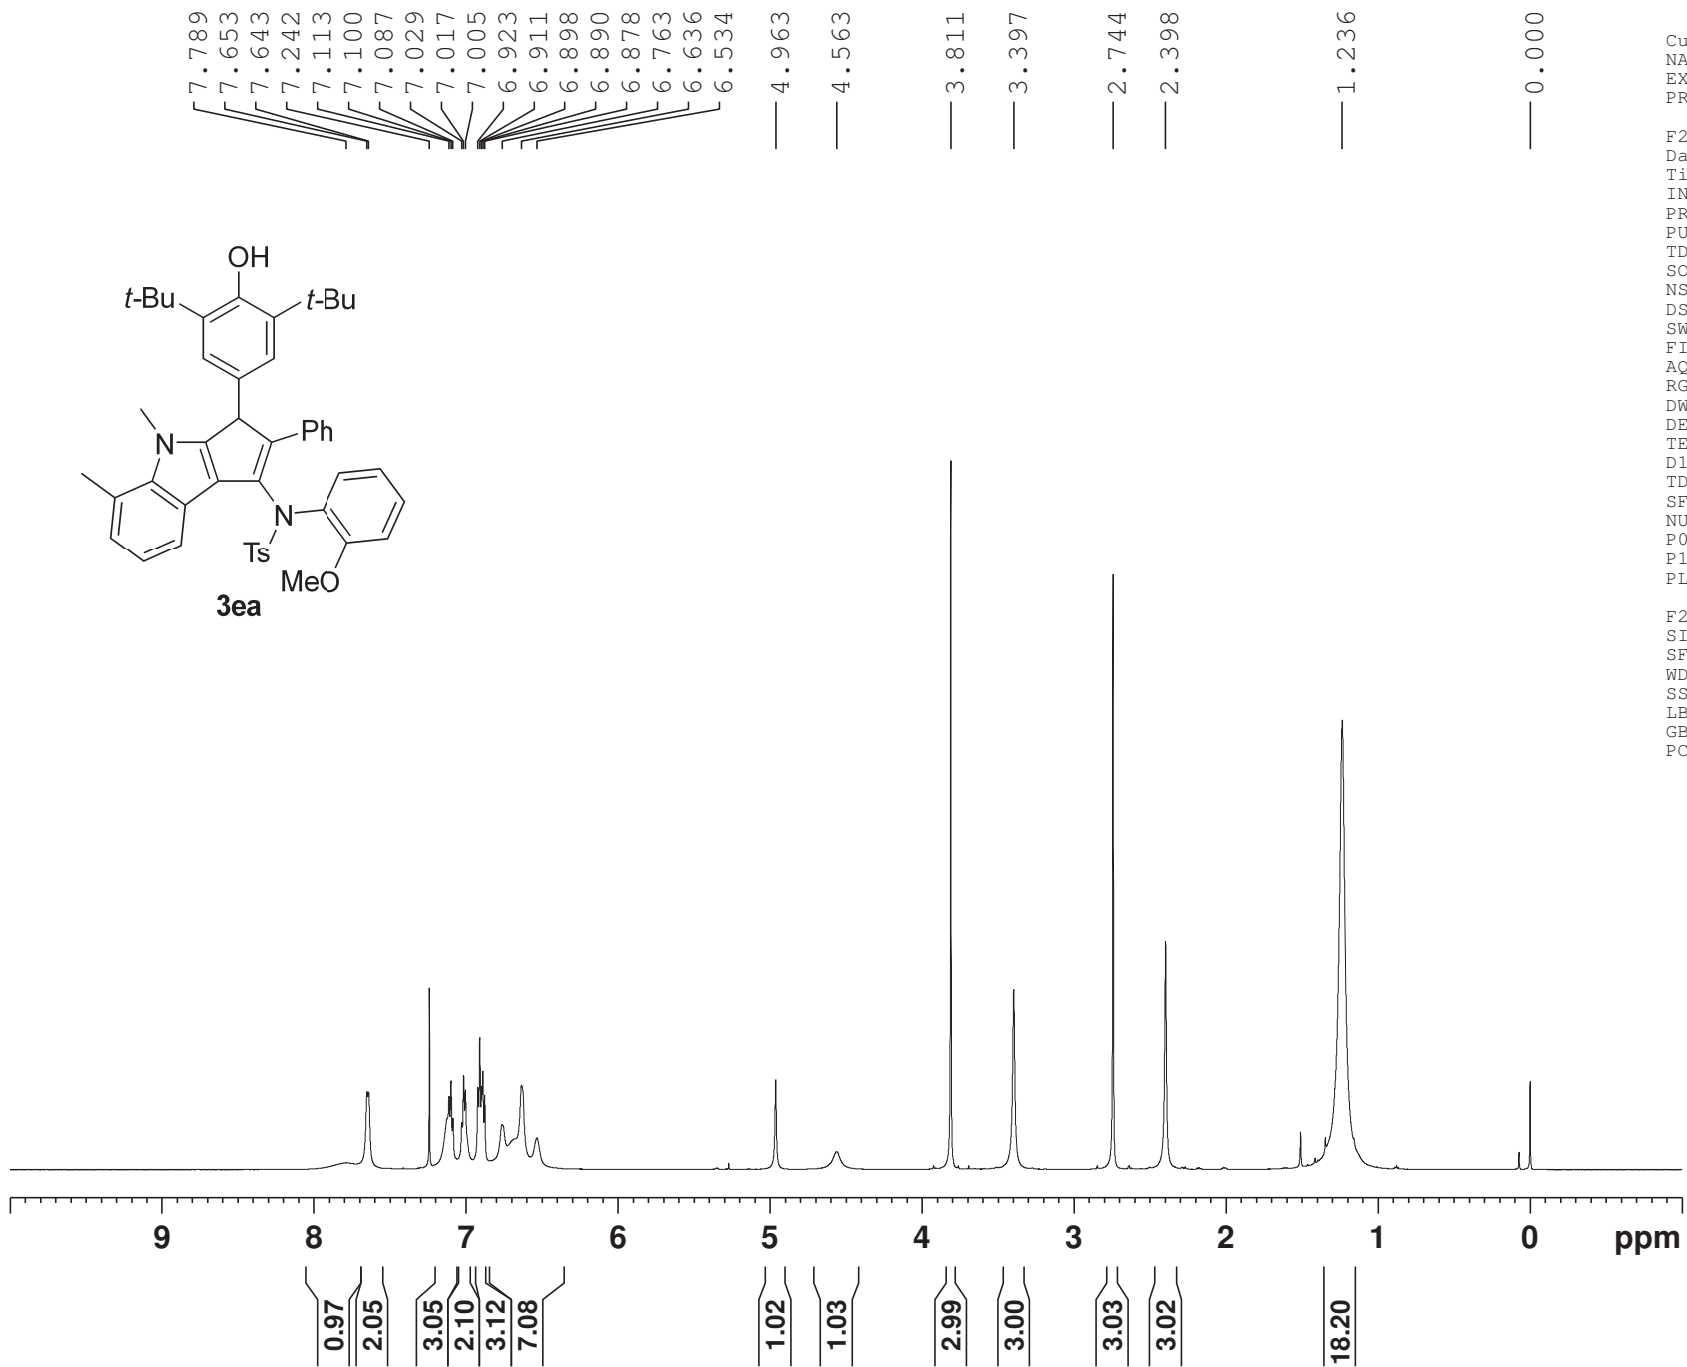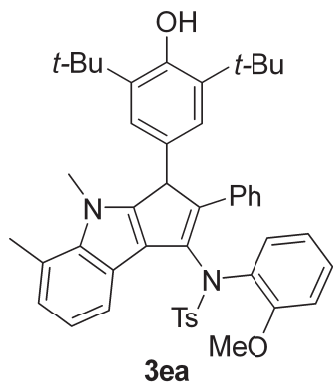

Current Data Parameters  
 NAME yukyl890 3fa  
 EXPNO 10  
 PROCNO 1

F2 - Acquisition Parameters  
 Date\_ 20201022  
 Time 11.41 h  
 INSTRUM Avance  
 PROBHD z168773\_0004 (  
 PULPROG zg30  
 TD 65536  
 SOLVENT CDCl3  
 NS 16  
 DS 2  
 SWH 11904.762 Hz  
 FIDRES 0.363304 Hz  
 AQ 2.7525120 sec  
 RG 47.619  
 DW 42.000 usec  
 DE 13.73 usec  
 TE 298.1 K  
 D1 1.00000000 sec  
 TD0 1  
 SFO1 600.1337058 MHz  
 NUC1 1H  
 P0 3.94 usec  
 P1 11.82 usec  
 PLW1 31.62299919 W

F2 - Processing parameters  
 SI 65536  
 SF 600.1300248 MHz  
 WDW EM  
 SSB 0  
 LB 0.30 Hz  
 GB 0  
 PC 1.00



152.53  
150.36  
142.56  
142.28  
139.36  
138.64  
135.82  
135.08  
130.15  
129.52  
128.69  
128.41  
128.04  
127.03  
126.31  
125.96  
124.71  
123.58  
122.55  
121.10  
120.90  
120.19  
119.90  
119.56  
111.53  
77.21  
77.00  
76.79

54.73  
51.69

34.52  
34.13  
30.23  
21.48  
19.95

Current Data Parameters  
NAME yukyl1890 3fa  
EXPNO 11  
PROCNO 1

F2 - Acquisition Parameters  
Date\_ 20201022  
Time 13.21 h  
INSTRUM Avance  
PROBHD Z168773\_0004 (  
PULPROG zgpg30  
TD 65536  
SOLVENT CDCl3  
NS 2048  
DS 4  
SWH 37037.035 Hz  
FIDRES 1.130281 Hz  
AQ 0.8847360 sec  
RG 101  
DW 13.500 usec  
DE 18.00 usec  
TE 298.1 K  
D1 2.00000000 sec  
D11 0.03000000 sec  
TD0 1  
SFO1 150.9194079 MHz  
NUC1 13C  
P0 6.13 usec  
P1 18.38 usec  
PLW1 76.86299896 W  
SFO2 600.1324005 MHz  
NUC2 1H  
CPDPRG[2] waltz65  
PCPD2 70.00 usec  
PLW2 31.62299919 W  
PLW12 0.94957000 W  
PLW13 0.47762999 W

F2 - Processing parameters  
SI 32768  
SF 150.9028164 MHz  
WDW EM  
SSB 0  
LB 1.00 Hz  
GB 0  
PC 1.40

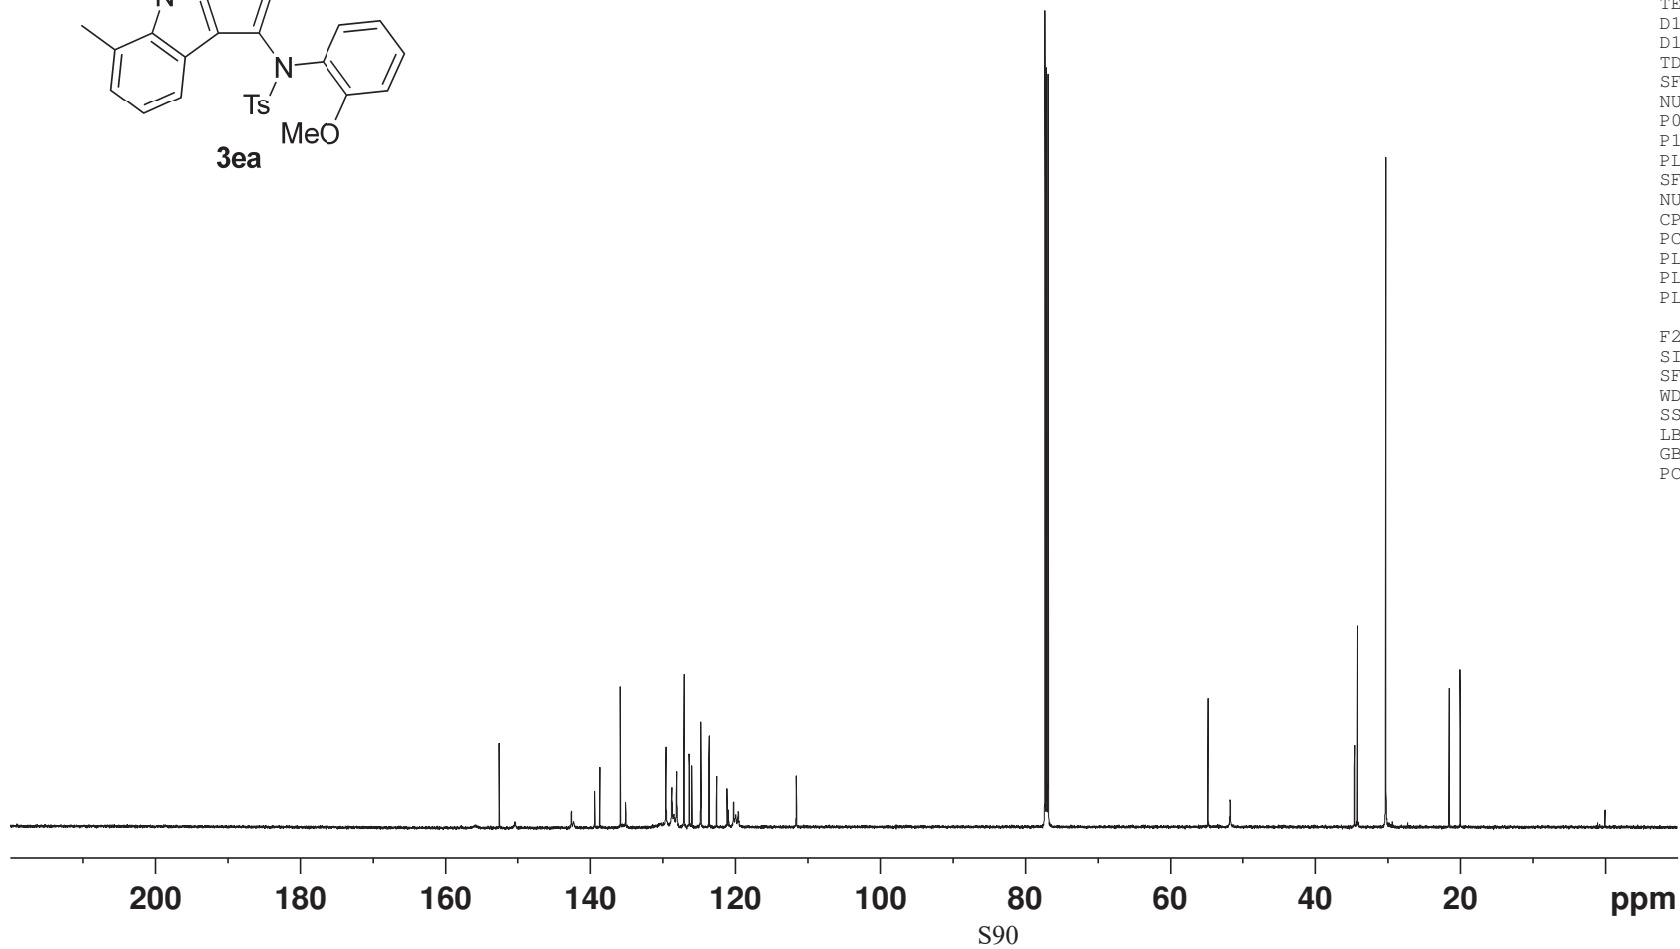

7.669  
7.656  
7.242  
7.206  
7.193  
7.155  
7.148  
7.140  
7.133  
7.099  
7.098  
7.087  
7.084  
7.076  
7.063  
6.990  
6.978  
6.965  
6.915  
6.911  
6.900  
6.896  
6.885  
6.881  
6.756  
6.743  
6.717  
6.519  
6.507  
6.495  
6.482  
4.985  
4.564  
3.504  
3.402

— 2.439  
  
— 1.251  
  
— 0.000

```

Current Data Parameters
NAME      yuky1893 3ha
EXPNO    10
PROCNO   1

F2 - Acquisition Parameters
Date_    20201112
Time     11.16 h
INSTRUM  Avance
PROBHD   Z150368_0010 (
PULPROG  zg30
TD       65536
SOLVENT  CDCl3
NS       16
DS       2
SWH      11904.762 Hz
FIDRES   0.363304 Hz
AQ       2.7525120 sec
RG       32
DW       42.000 usec
DE       18.78 usec
TE       298.0 K
D1       1.00000000 sec
TD0      1
SFO1     600.1337058 MHz
NUC1     1H
P0       4.33 usec
P1       13.00 usec
PLW1     21.26799965 W

F2 - Processing parameters
SI       65536
SF       600.1300249 MHz
WDW      EM
SSB      0
LB       0.30 Hz
GB       0
PC       1.00
  
```

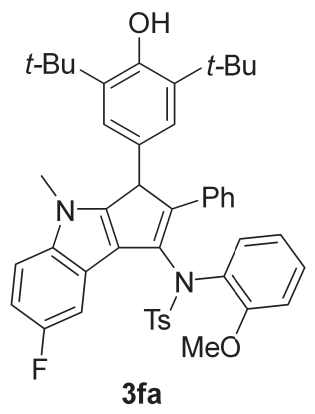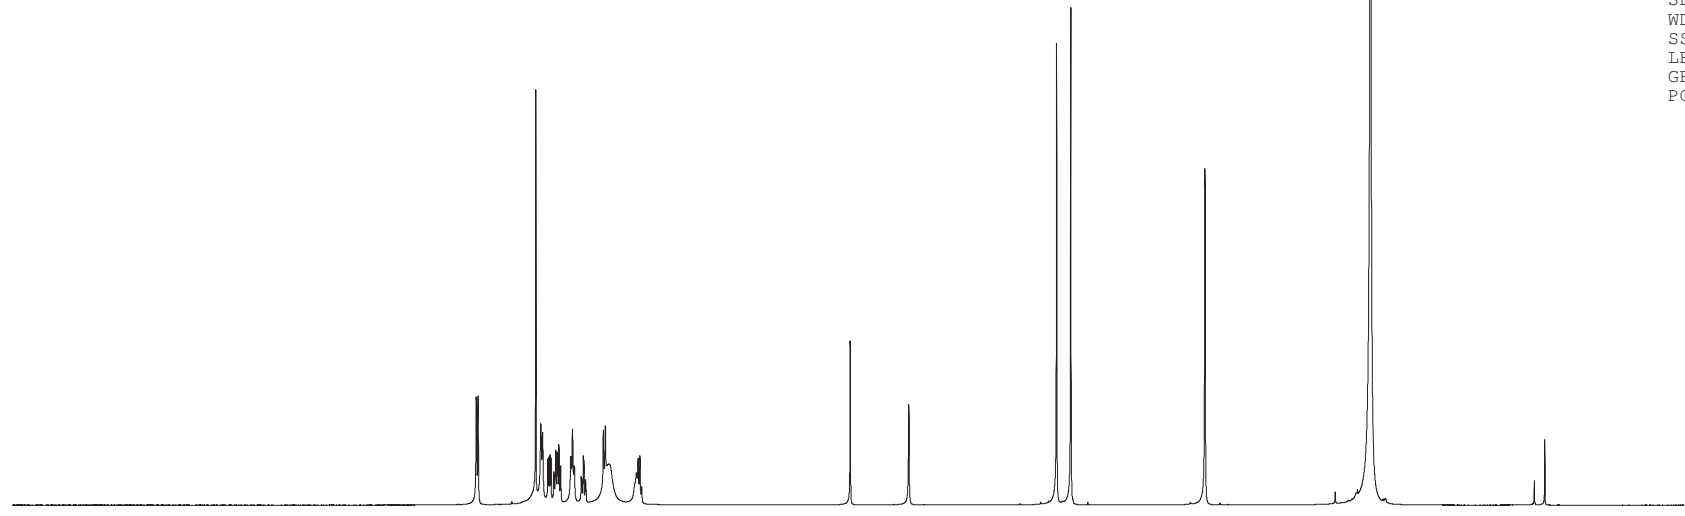

2.03  
1.83  
2.05  
1.09  
2.11  
2.01  
1.04  
5.08  
2.06  
  
1.00  
0.99  
  
3.02  
3.06  
  
3.00  
  
18.10

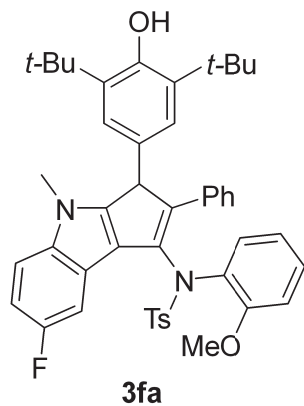

158.64  
157.10  
156.16  
152.64  
151.33  
143.14  
142.30  
138.50  
137.34  
135.91  
135.07  
130.68  
129.60  
129.02  
128.81  
128.06  
127.26  
126.64  
125.51  
124.70  
121.75  
121.68  
120.58  
119.75  
111.50  
109.40  
109.33  
108.45  
108.28  
107.06  
106.89  
77.21  
77.00  
76.79  
54.79  
51.65

34.14  
30.80  
30.22  
21.49

Current Data Parameters  
NAME yukyl893 3ha  
EXPNO 11  
PROCNO 1

F2 - Acquisition Parameters  
Date\_ 20201112  
Time 14.12 h  
INSTRUM Avance  
PROBHD Z150368\_0010 (  
PULPROG zgpg30  
TD 65536  
SOLVENT CDC13  
NS 3600  
DS 2  
SWH 37037.035 Hz  
FIDRES 1.130281 Hz  
AQ 0.8847360 sec  
RG 101  
DW 13.500 usec  
DE 18.00 usec  
TE 298.1 K  
D1 2.00000000 sec  
D11 0.03000000 sec  
TD0 1  
SFO1 150.9194079 MHz  
NUC1 13C  
P0 3.33 usec  
P1 10.00 usec  
PLW1 66.87999725 W  
SFO2 600.1324005 MHz  
NUC2 1H  
CPDPRG[2] waltz65  
PCPD2 80.00 usec  
PLW2 21.26799965 W  
PLW12 0.56160998 W  
PLW13 0.28204000 W

F2 - Processing parameters  
SI 32768  
SF 150.9028161 MHz  
WDW EM  
SSB 0  
LB 1.00 Hz  
GB 0  
PC 1.40

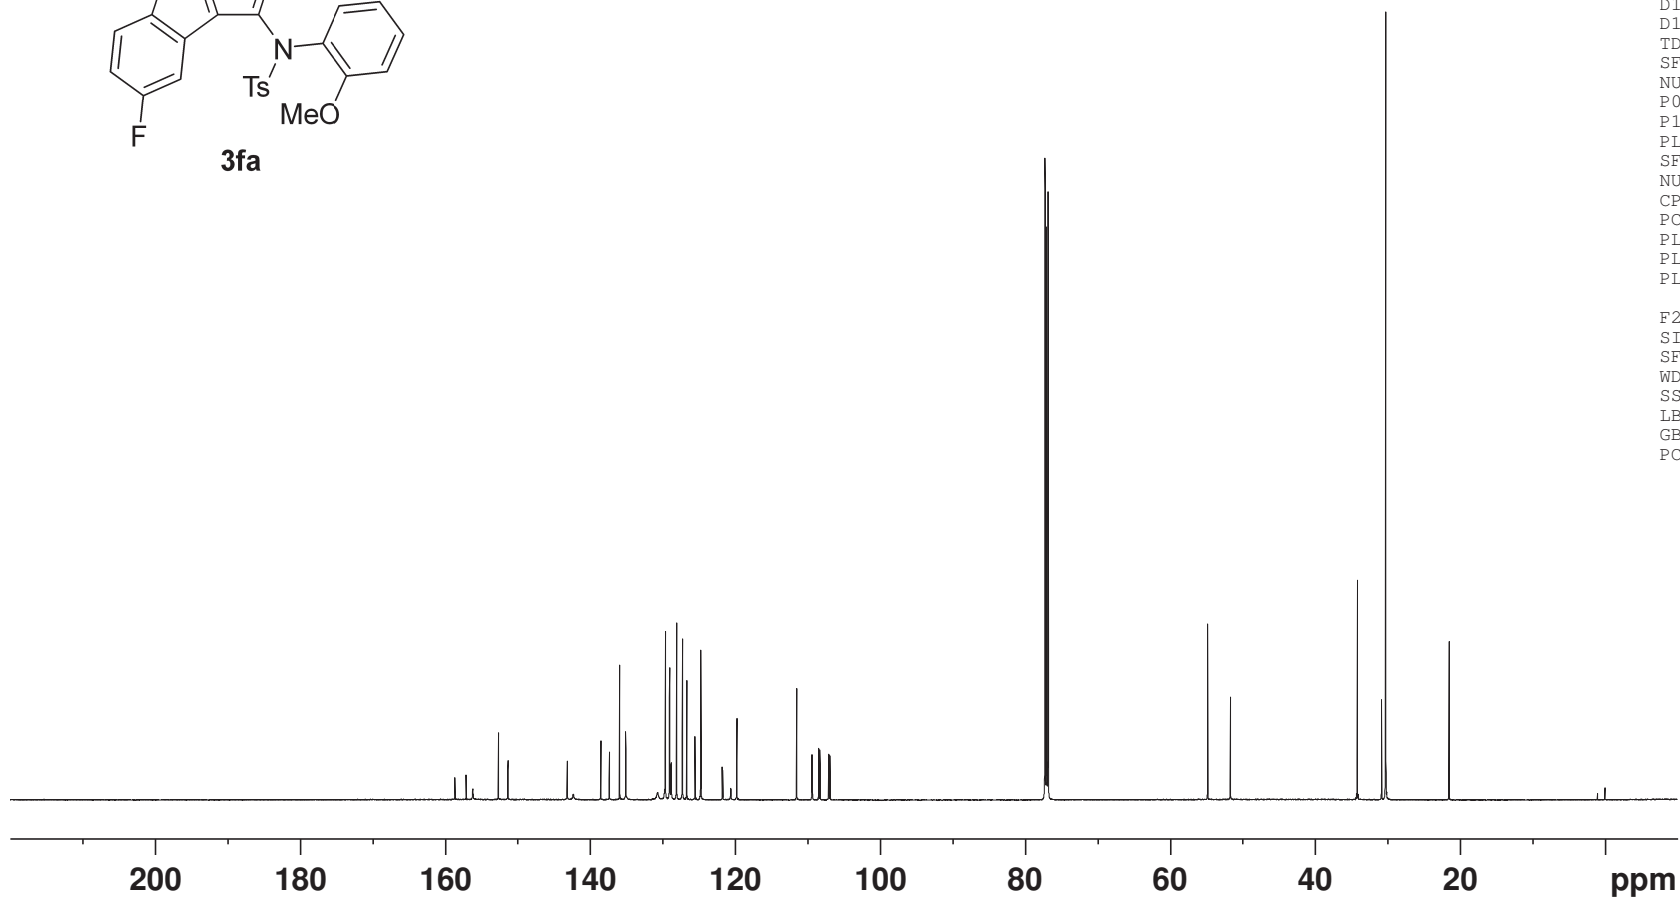

7.643  
7.630  
7.253  
7.235  
7.222  
7.159  
7.144  
7.127  
7.119  
7.113  
7.106  
7.099  
7.084  
7.081  
7.068  
7.057  
6.875  
6.752  
6.739  
6.511  
6.504  
4.993  
4.566

3.502  
3.392

2.463

1.261

0.000

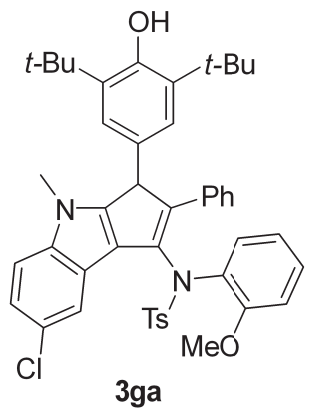

Current Data Parameters  
NAME yukyl894 3ia  
EXPNO 10  
PROCNO 1

F2 - Acquisition Parameters  
Date\_ 20201022  
Time 12.20 h  
INSTRUM Avance  
PROBHD z150368\_0010 (  
PULPROG zg30  
TD 65536  
SOLVENT CDCl3  
NS 16  
DS 2  
SWH 11904.762 Hz  
FIDRES 0.363304 Hz  
AQ 2.7525120 sec  
RG 32  
DW 42.000 usec  
DE 18.78 usec  
TE 298.1 K  
D1 1.00000000 sec  
TD0 1  
SFO1 600.1337058 MHz  
NUC1 1H  
P0 4.33 usec  
P1 13.00 usec  
PLW1 21.26799965 W

F2 - Processing parameters  
SI 65536  
SF 600.1300187 MHz  
WDW EM  
SSB 0  
LB 0.30 Hz  
GB 0  
PC 1.00

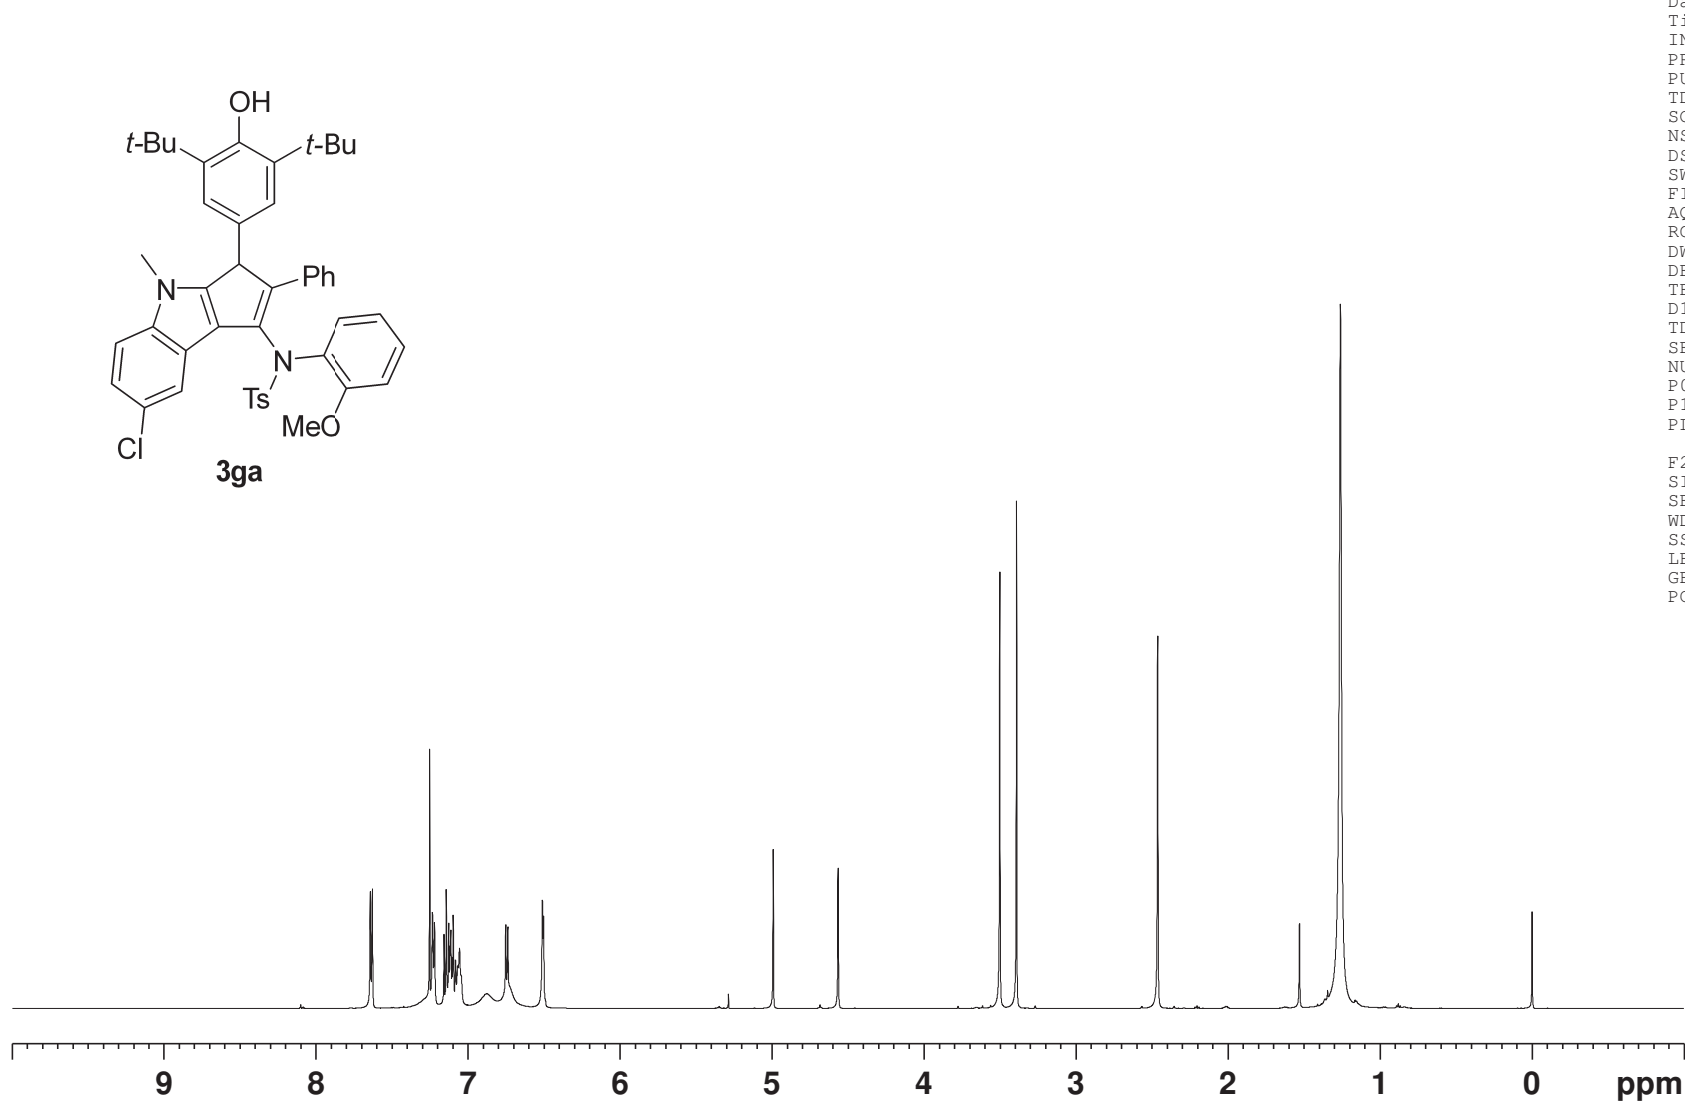

1.99  
1.68  
2.01  
6.14  
2.00  
3.00  
2.06

1.00  
0.99

3.01  
3.03

3.00

18.03

S93

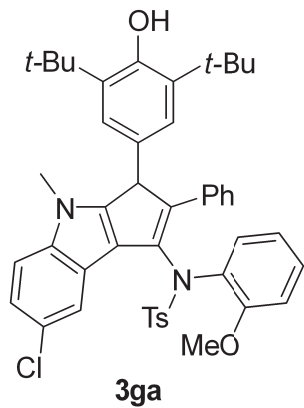

156.20  
152.69  
151.20  
143.26  
139.01  
138.48  
135.97  
135.08  
134.77  
131.39  
129.69  
129.34  
129.15  
128.96  
127.96  
127.43  
126.83  
125.31  
125.09  
124.74  
122.18  
121.29  
120.41  
119.97  
119.81  
111.39  
109.96  
77.21  
77.00  
76.79

54.71  
51.64

34.17  
30.76  
30.23  
21.68

Current Data Parameters  
NAME yukyl1894 3ia  
EXPNO 11  
PROCNO 1

F2 - Acquisition Parameters  
Date\_ 20201022  
Time 14.47 h  
INSTRUM Avance  
PROBHD Z150368\_0010 (  
PULPROG zgpg30  
TD 65536  
SOLVENT CDC13  
NS 3000  
DS 2  
SWH 37037.035 Hz  
FIDRES 1.130281 Hz  
AQ 0.8847360 sec  
RG 101  
DW 13.500 usec  
DE 18.00 usec  
TE 298.0 K  
D1 2.00000000 sec  
D11 0.03000000 sec  
TD0 1  
SFO1 150.9194079 MHz  
NUC1 13C  
P0 3.33 usec  
P1 10.00 usec  
PLW1 66.87999725 W  
SFO2 600.1324005 MHz  
NUC2 1H  
CPDPRG[2] waltz65  
PCPD2 80.00 usec  
PLW2 21.26799965 W  
PLW12 0.56160998 W  
PLW13 0.28204000 W

F2 - Processing parameters  
SI 32768  
SF 150.9028126 MHz  
WDW EM  
SSB 0  
LB 1.00 Hz  
GB 0  
PC 1.40

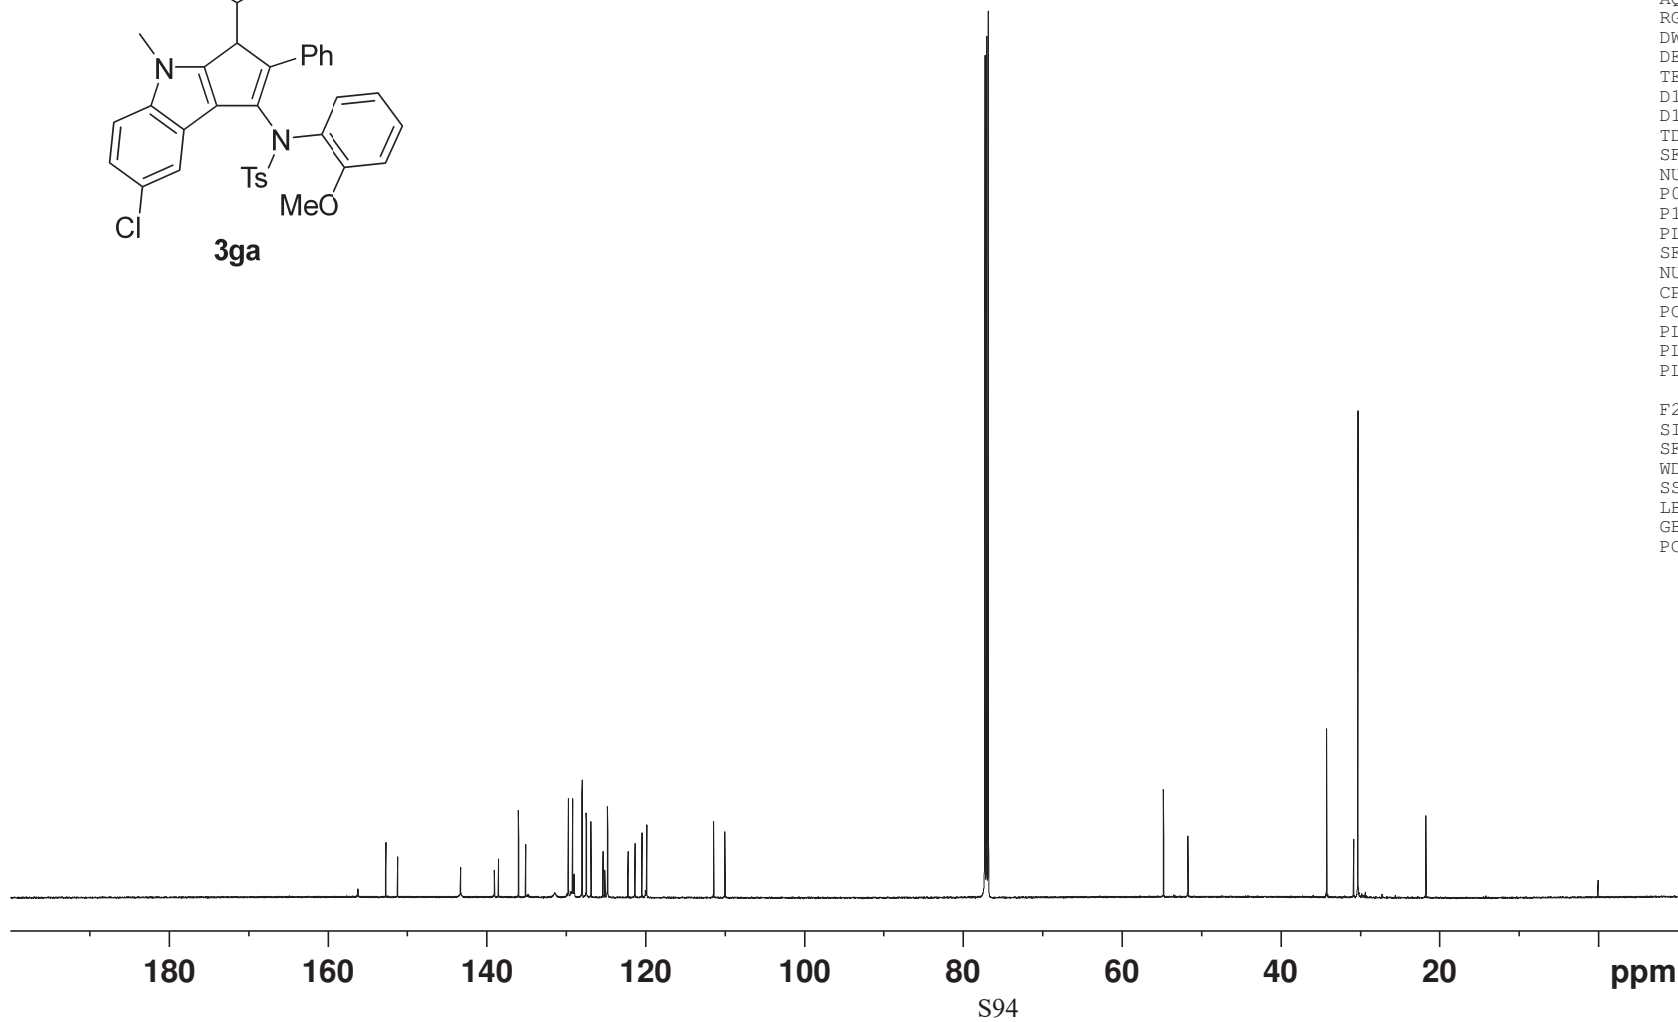

7.635  
7.621  
7.454  
7.248  
7.242  
7.228  
7.225  
7.221  
7.210  
7.207  
7.147  
7.135  
7.123  
7.118  
7.111  
7.100  
7.097  
7.081  
7.070  
6.901  
6.744  
6.731  
6.506  
6.497  
4.994  
4.563

3.492  
3.392

2.468

1.262

0.000

Current Data Parameters  
NAME yukyl886 3ja  
EXPNO 10  
PROCNO 1

F2 - Acquisition Parameters  
Date\_ 20201110  
Time 20.06 h  
INSTRUM Avance  
PROBHD z150368\_0010 (  
PULPROG zg30  
TD 65536  
SOLVENT CDCl3  
NS 16  
DS 2  
SWH 11904.762 Hz  
FIDRES 0.363304 Hz  
AQ 2.7525120 sec  
RG 32  
DW 42.000 usec  
DE 18.78 usec  
TE 298.1 K  
D1 1.00000000 sec  
TD0 1  
SFO1 600.1337058 MHz  
NUC1 1H  
P0 4.33 usec  
P1 13.00 usec  
PLW1 21.26799965 W

F2 - Processing parameters  
SI 65536  
SF 600.1300219 MHz  
WDW EM  
SSB 0  
LB 0.30 Hz  
GB 0  
PC 1.00

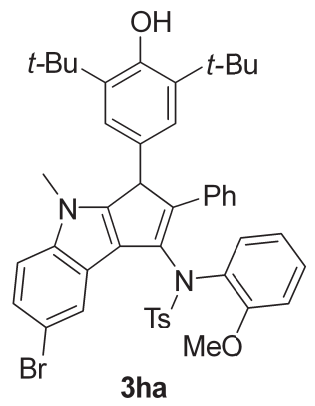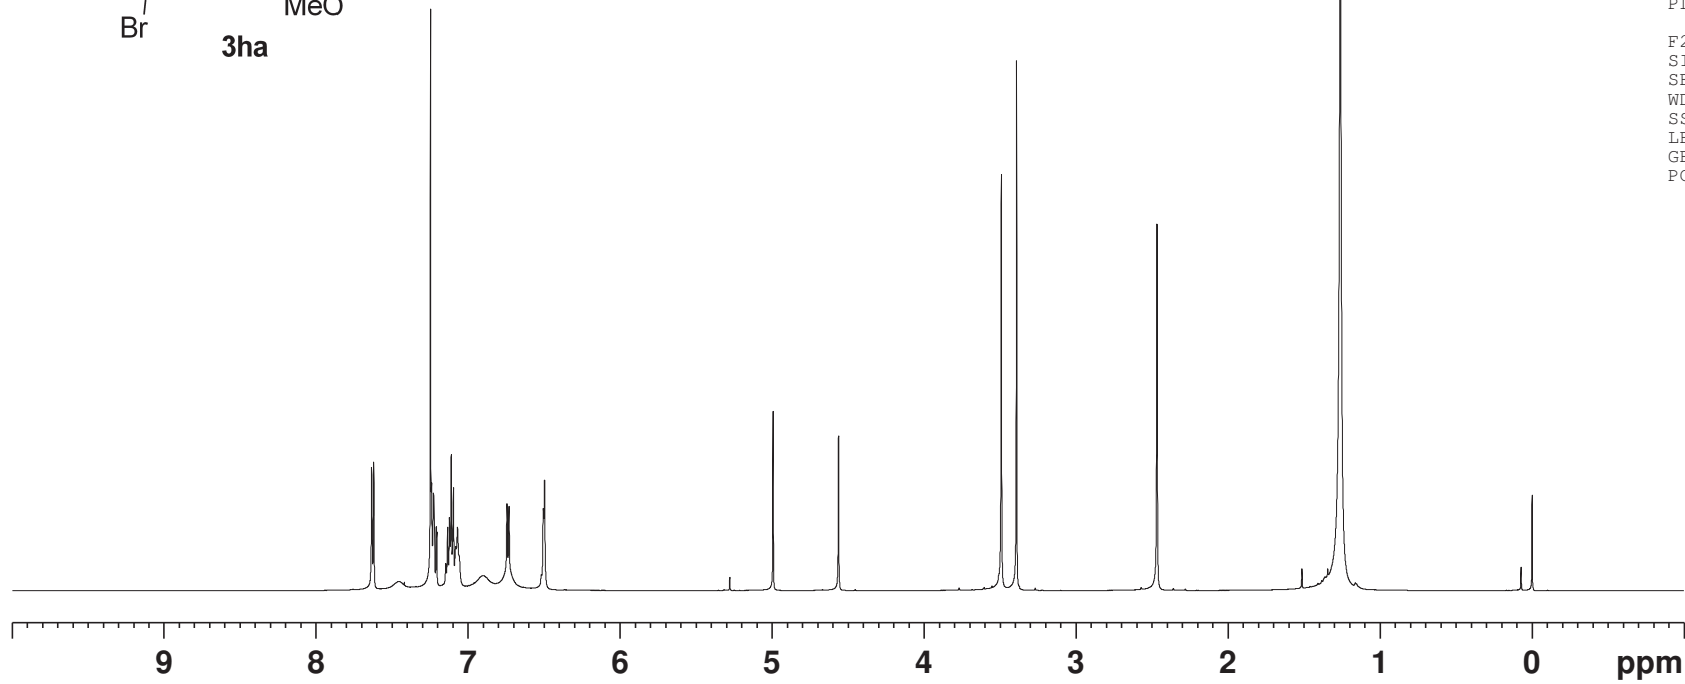

2.00  
1.05  
3.06  
5.06  
2.04  
3.05  
2.07

1.00  
1.01

3.02  
2.99

3.00

18.06



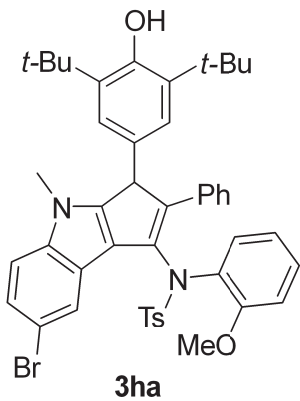

156.21  
152.69  
151.06  
143.39  
143.22  
139.26  
138.42  
135.97  
135.07  
134.71  
131.49  
129.70  
129.18  
129.00  
127.90  
127.45  
126.86  
125.25  
124.74  
124.27  
122.98  
122.75  
119.82  
112.82  
111.36  
110.47  
77.21  
77.00  
76.79

54.72  
51.61

34.17  
30.73  
30.23  
21.77

Current Data Parameters  
NAME yukyl886 3ja  
EXPNO 11  
PROCNO 1

F2 - Acquisition Parameters  
Date\_ 20201110  
Time 23.03 h  
INSTRUM Avance  
PROBHD Z150368\_0010 (  
PULPROG zgpg30  
TD 65536  
SOLVENT CDC13  
NS 3600  
DS 2  
SWH 37037.035 Hz  
FIDRES 1.130281 Hz  
AQ 0.8847360 sec  
RG 101  
DW 13.500 usec  
DE 18.00 usec  
TE 298.0 K  
D1 2.00000000 sec  
D11 0.03000000 sec  
TD0 1  
SFO1 150.9194079 MHz  
NUC1 13C  
P0 3.33 usec  
P1 10.00 usec  
PLW1 66.87999725 W  
SFO2 600.1324005 MHz  
NUC2 1H  
CPDPRG[2] waltz65  
PCPD2 80.00 usec  
PLW2 21.26799965 W  
PLW12 0.56160998 W  
PLW13 0.28204000 W

F2 - Processing parameters  
SI 32768  
SF 150.9028147 MHz  
WDW EM  
SSB 0  
LB 1.00 Hz  
GB 0  
PC 1.40

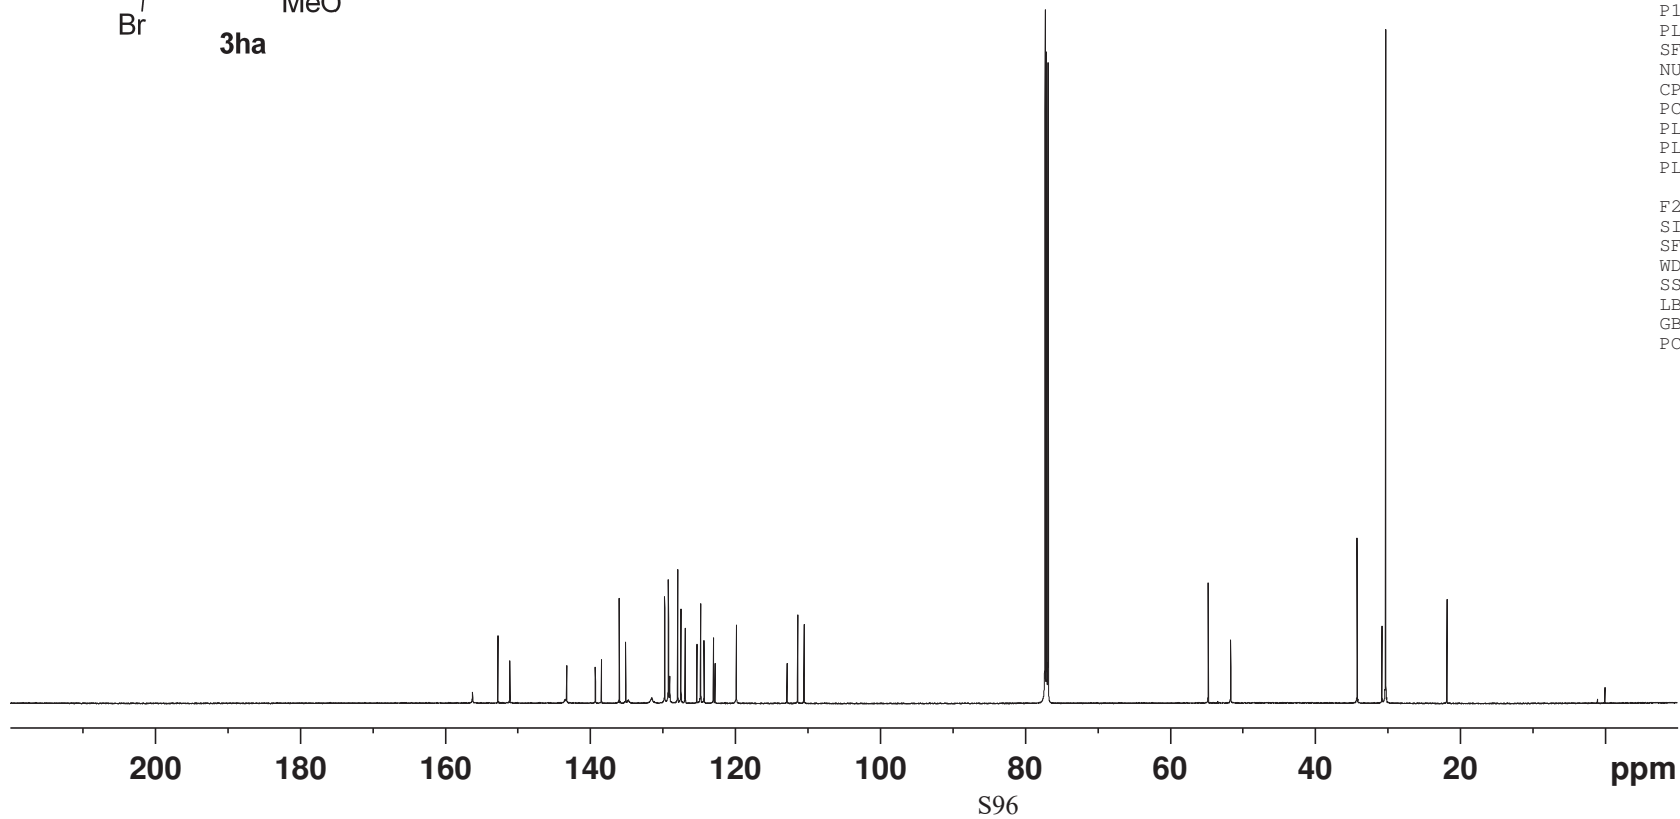

7.812  
7.673  
7.660  
7.432  
7.430  
7.248  
7.235  
7.196  
7.183  
7.112  
7.108  
7.098  
7.084  
7.058  
7.046  
7.033  
6.925  
6.913  
6.900  
6.762  
6.749  
6.662  
6.584  
6.479  
6.469  
4.988  
4.568

3.485  
3.397  
2.434  
1.239  
0.000

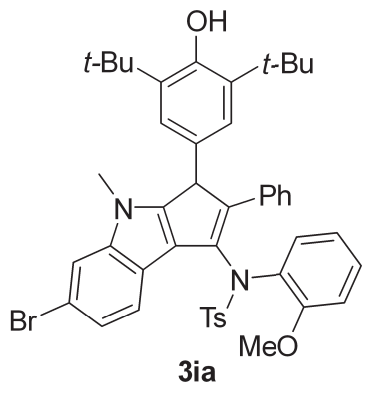

Current Data Parameters  
 NAME yuky1891 3ka  
 EXPNO 12  
 PROCNO 1

F2 - Acquisition Parameters  
 Date\_ 20201109  
 Time 22.37 h  
 INSTRUM Avance  
 PROBHD z168773\_0004 (  
 PULPROG zg30  
 TD 65536  
 SOLVENT CDCl3  
 NS 16  
 DS 2  
 SWH 11904.762 Hz  
 FIDRES 0.363304 Hz  
 AQ 2.7525120 sec  
 RG 47.619  
 DW 42.000 usec  
 DE 13.73 usec  
 TE 298.1 K  
 D1 1.00000000 sec  
 TD0 1  
 SFO1 600.1337058 MHz  
 NUC1 1H  
 P0 3.94 usec  
 P1 11.82 usec  
 PLW1 31.62299919 W

F2 - Processing parameters  
 SI 65536  
 SF 600.1300220 MHz  
 WDW EM  
 SSB 0  
 LB 0.30 Hz  
 GB 0  
 PC 1.00

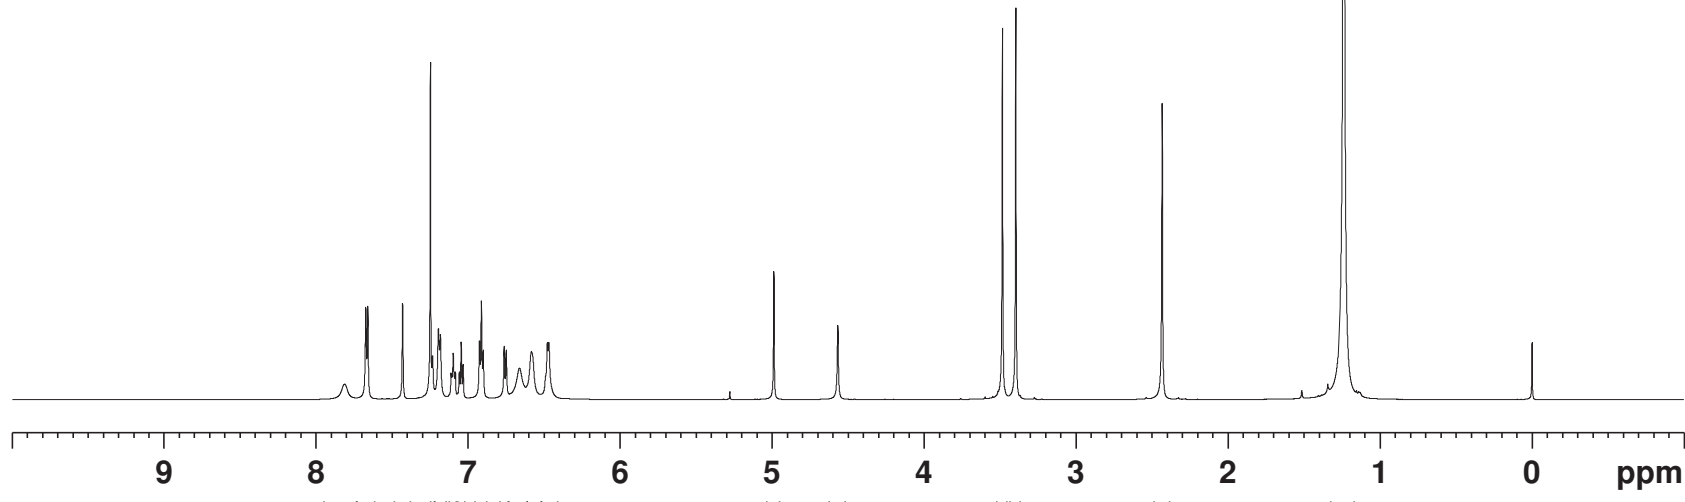

0.99  
2.01  
1.01  
1.13  
1.99  
1.03  
1.01  
2.02  
1.08  
1.99  
2.00  
2.01  
1.00  
1.00  
3.03  
3.00  
3.00  
18.01

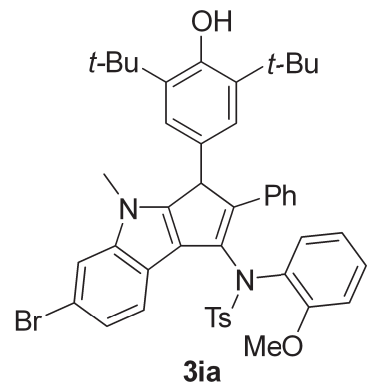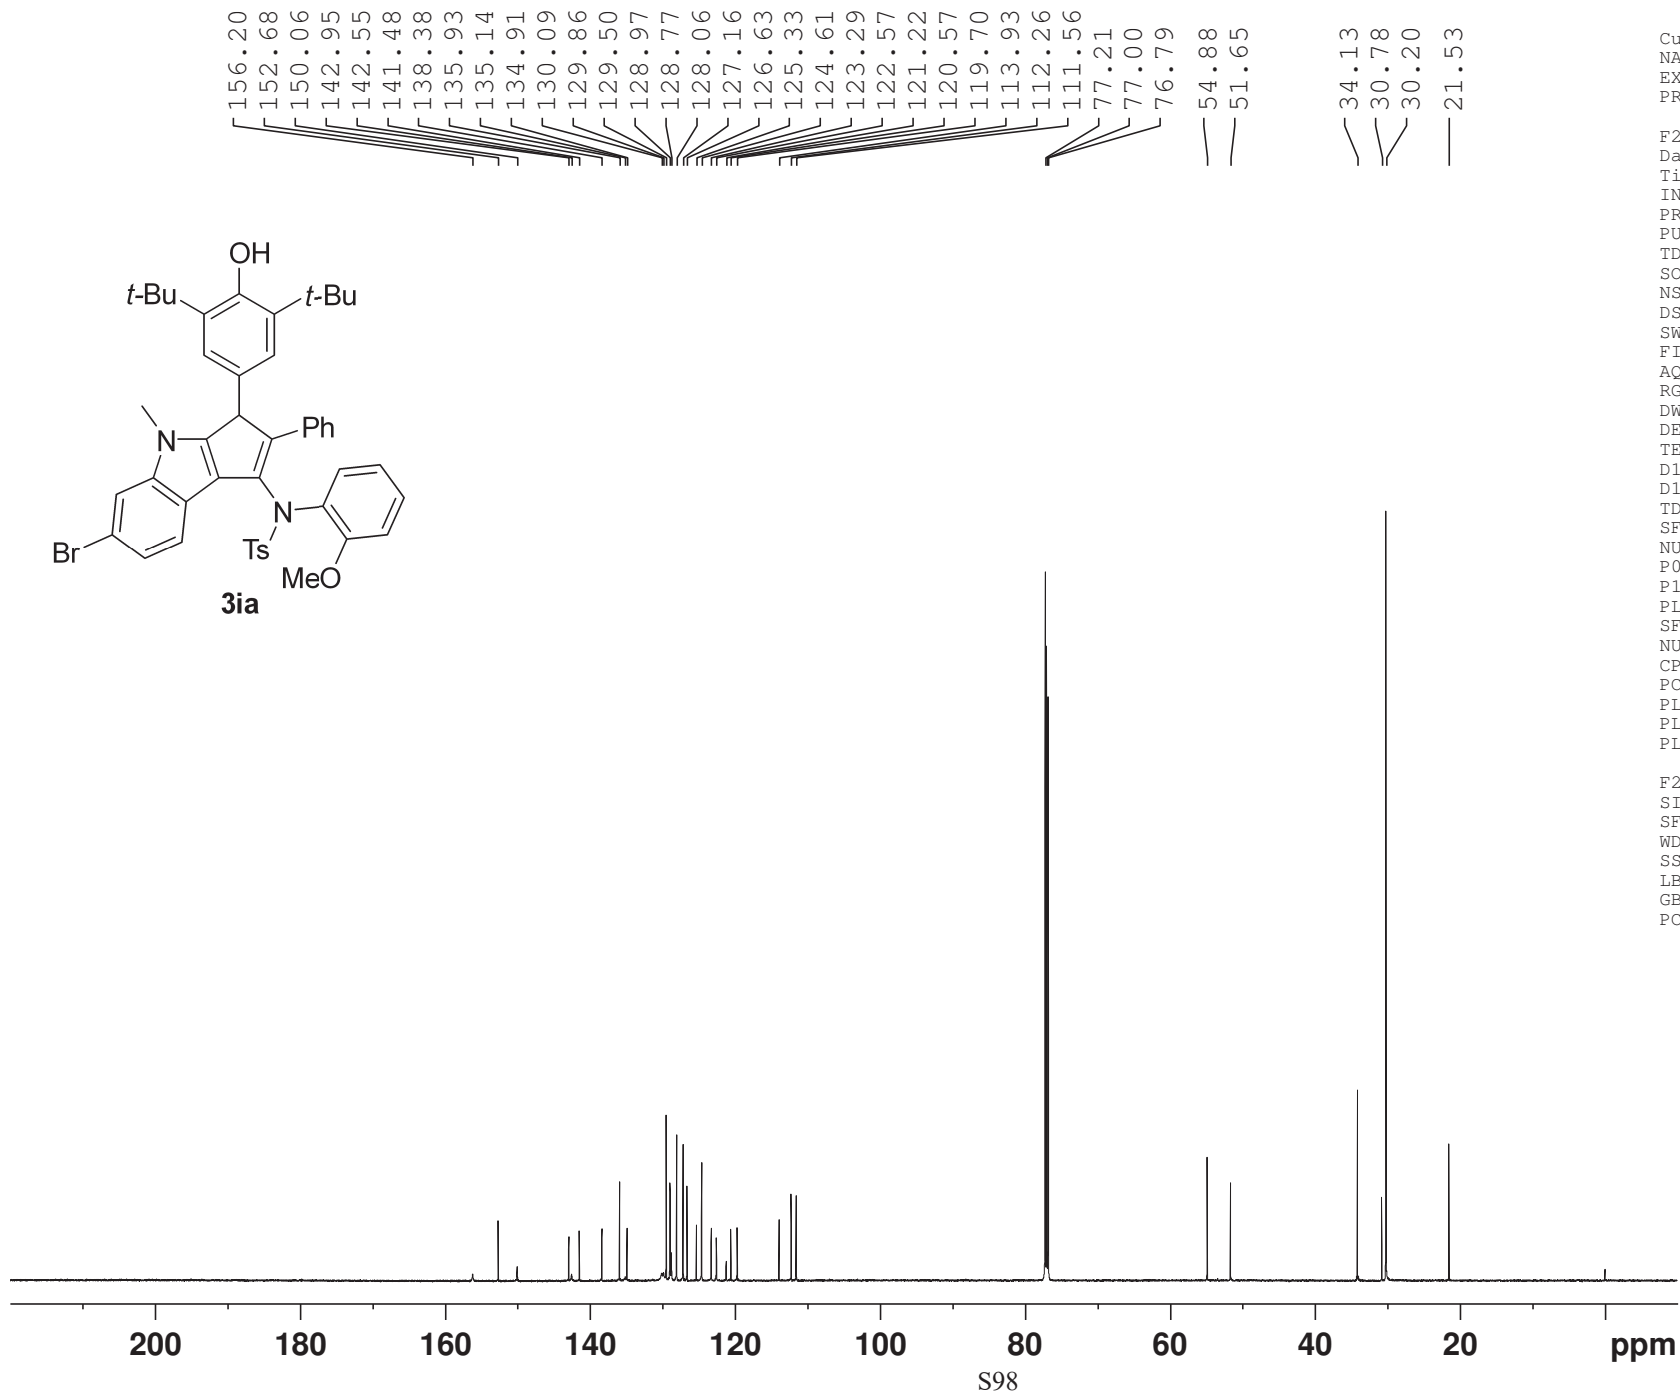

Current Data Parameters  
 NAME yukyl891 3ka  
 EXPNO 13  
 PROCNO 1

F2 - Acquisition Parameters  
 Date\_ 20201110  
 Time 1.34 h  
 INSTRUM Avance  
 PROBHD Z168773\_0004 (  
 PULPROG zgpg30  
 TD 65536  
 SOLVENT CDC13  
 NS 3600  
 DS 4  
 SWH 37037.035 Hz  
 FIDRES 1.130281 Hz  
 AQ 0.8847360 sec  
 RG 101  
 DW 13.500 usec  
 DE 18.00 usec  
 TE 298.0 K  
 D1 2.00000000 sec  
 D11 0.03000000 sec  
 TD0 1  
 SFO1 150.9194079 MHz  
 NUC1 13C  
 P0 6.13 usec  
 P1 18.38 usec  
 PLW1 76.86299896 W  
 SFO2 600.1324005 MHz  
 NUC2 1H  
 CPDPRG[2] waltz65  
 PCPD2 70.00 usec  
 PLW2 31.62299919 W  
 PLW12 0.94957000 W  
 PLW13 0.47762999 W

F2 - Processing parameters  
 SI 32768  
 SF 150.9028156 MHz  
 WDW EM  
 SSB 0  
 LB 1.00 Hz  
 GB 0  
 PC 1.40

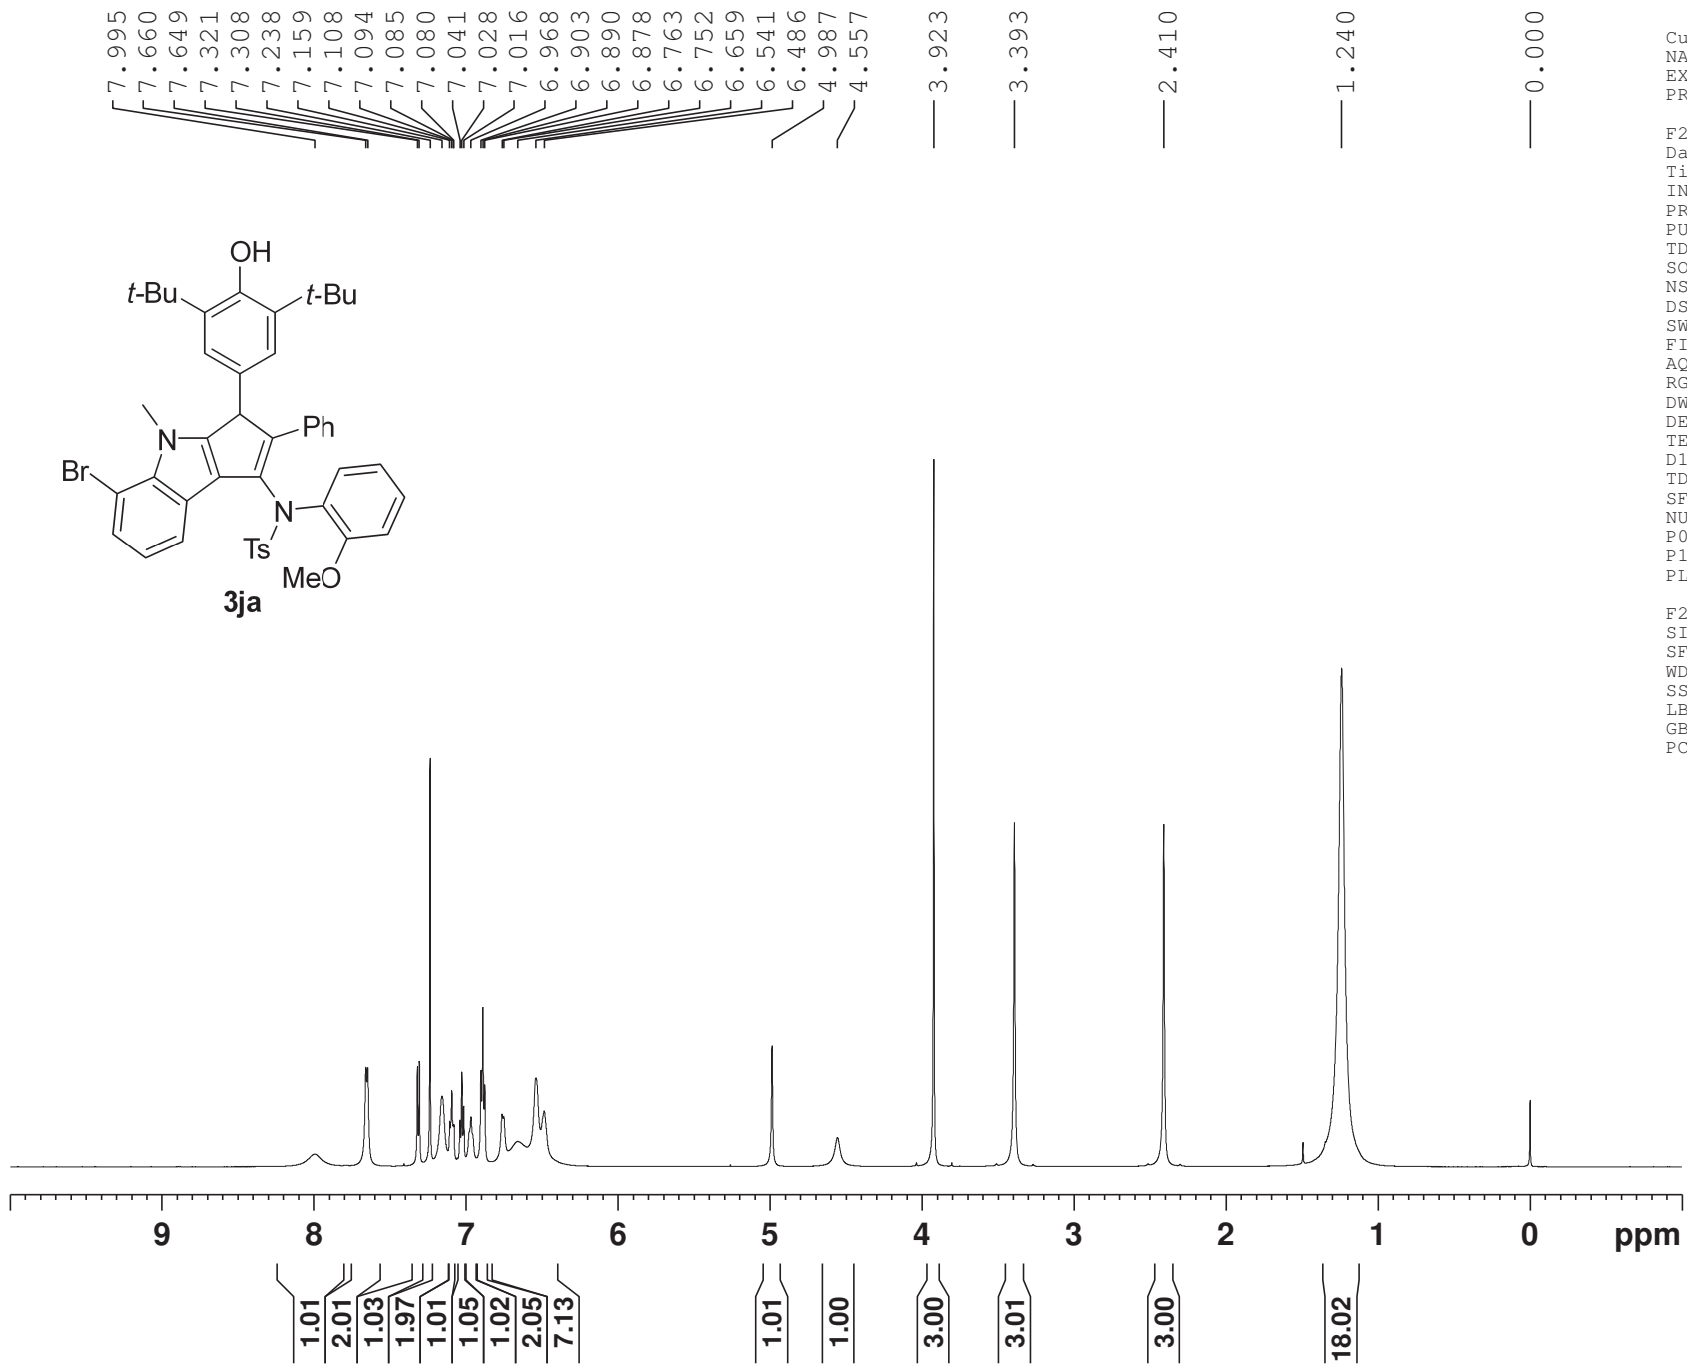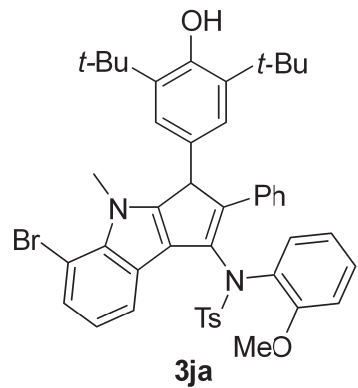

Current Data Parameters  
 NAME yukyl892 31a  
 EXPNO 10  
 PROCNO 1

F2 - Acquisition Parameters  
 Date\_ 20201112  
 Time 22.45 h  
 INSTRUM Avance  
 PROBHD z150368\_0010 (  
 PULPROG zg30  
 TD 65536  
 SOLVENT CDCl3  
 NS 16  
 DS 2  
 SWH 11904.762 Hz  
 FIDRES 0.363304 Hz  
 AQ 2.7525120 sec  
 RG 32  
 DW 42.000 usec  
 DE 18.78 usec  
 TE 298.0 K  
 D1 1.00000000 sec  
 TD0 1  
 SFO1 600.1337058 MHz  
 NUC1 1H  
 P0 4.33 usec  
 P1 13.00 usec  
 PLW1 21.26799965 W

F2 - Processing parameters  
 SI 65536  
 SF 600.1300278 MHz  
 WDW EM  
 SSB 0  
 LB 0.30 Hz  
 GB 0  
 PC 1.00

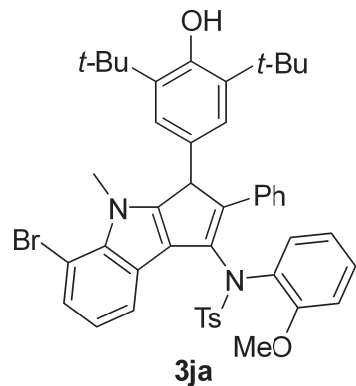

156.00  
152.68  
151.18  
142.86  
138.41  
136.60  
135.94  
134.78  
129.91  
129.52  
128.87  
128.66  
128.05  
127.08  
126.61  
125.76  
125.30  
124.82  
124.65  
121.50  
121.21  
120.52  
119.72  
111.57  
103.61  
77.21  
77.00  
76.79  
54.80  
51.97  
34.65  
34.13  
30.20  
21.49

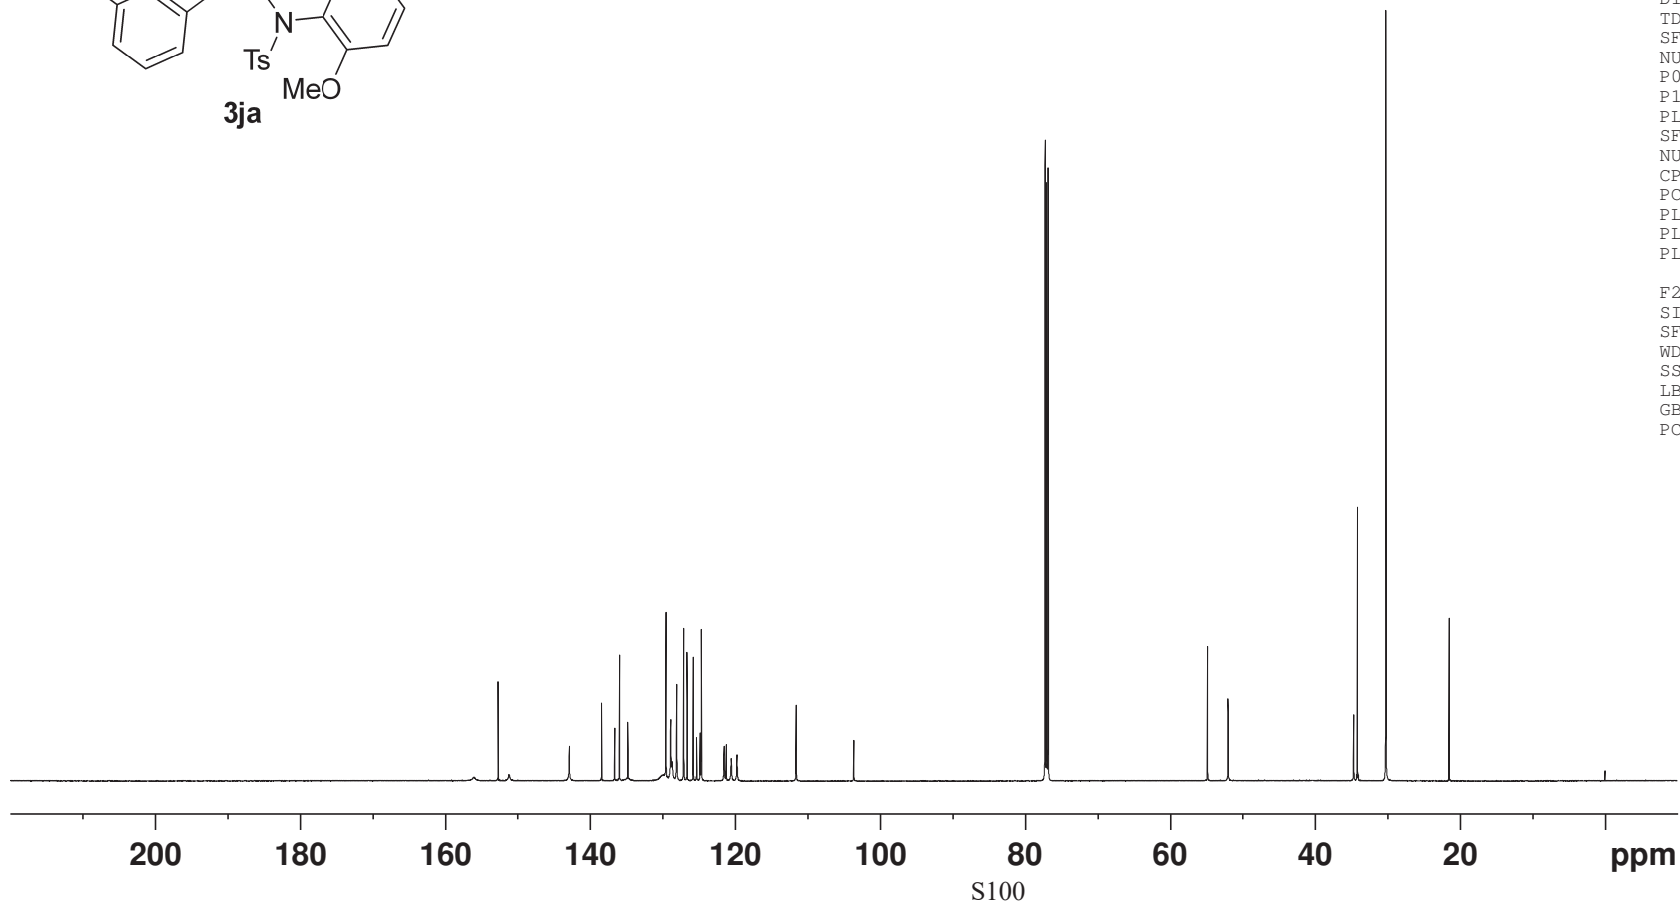

Current Data Parameters  
NAME yukyl1892 3la  
EXPNO 11  
PROCNO 1

F2 - Acquisition Parameters  
Date\_ 20201113  
Time 1.42 h  
INSTRUM Avance  
PROBHD Z150368\_0010 (  
PULPROG zgpg30  
TD 65536  
SOLVENT CDCl3  
NS 3600  
DS 2  
SWH 37037.035 Hz  
FIDRES 1.130281 Hz  
AQ 0.8847360 sec  
RG 101  
DW 13.500 usec  
DE 18.00 usec  
TE 298.1 K  
D1 2.00000000 sec  
D11 0.03000000 sec  
TD0 1  
SFO1 150.9194079 MHz  
NUC1 13C  
P0 3.33 usec  
P1 10.00 usec  
PLW1 66.87999725 W  
SFO2 600.1324005 MHz  
NUC2 1H  
CPDPRG[2] waltz65  
PCPD2 80.00 usec  
PLW2 21.26799965 W  
PLW12 0.56160998 W  
PLW13 0.28204000 W

F2 - Processing parameters  
SI 32768  
SF 150.9028182 MHz  
WDW EM  
SSB 0  
LB 1.00 Hz  
GB 0  
PC 1.40

7.177  
7.155  
7.148  
7.144  
7.130  
7.064  
7.051  
7.043  
7.037  
7.030  
6.964  
6.950  
6.943  
6.930  
6.878  
6.870  
6.864  
6.821  
6.808  
6.795  
6.782  
6.769  
6.751  
6.699  
6.687  
6.657  
6.640  
6.615  
6.121  
6.108  
5.155  
4.919  
4.876  
4.407  
3.547  
3.540  
3.353  
3.071  
3.001  
2.299  
2.257  
1.340  
1.166

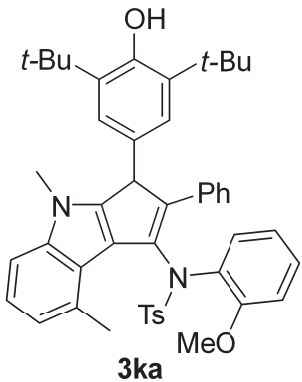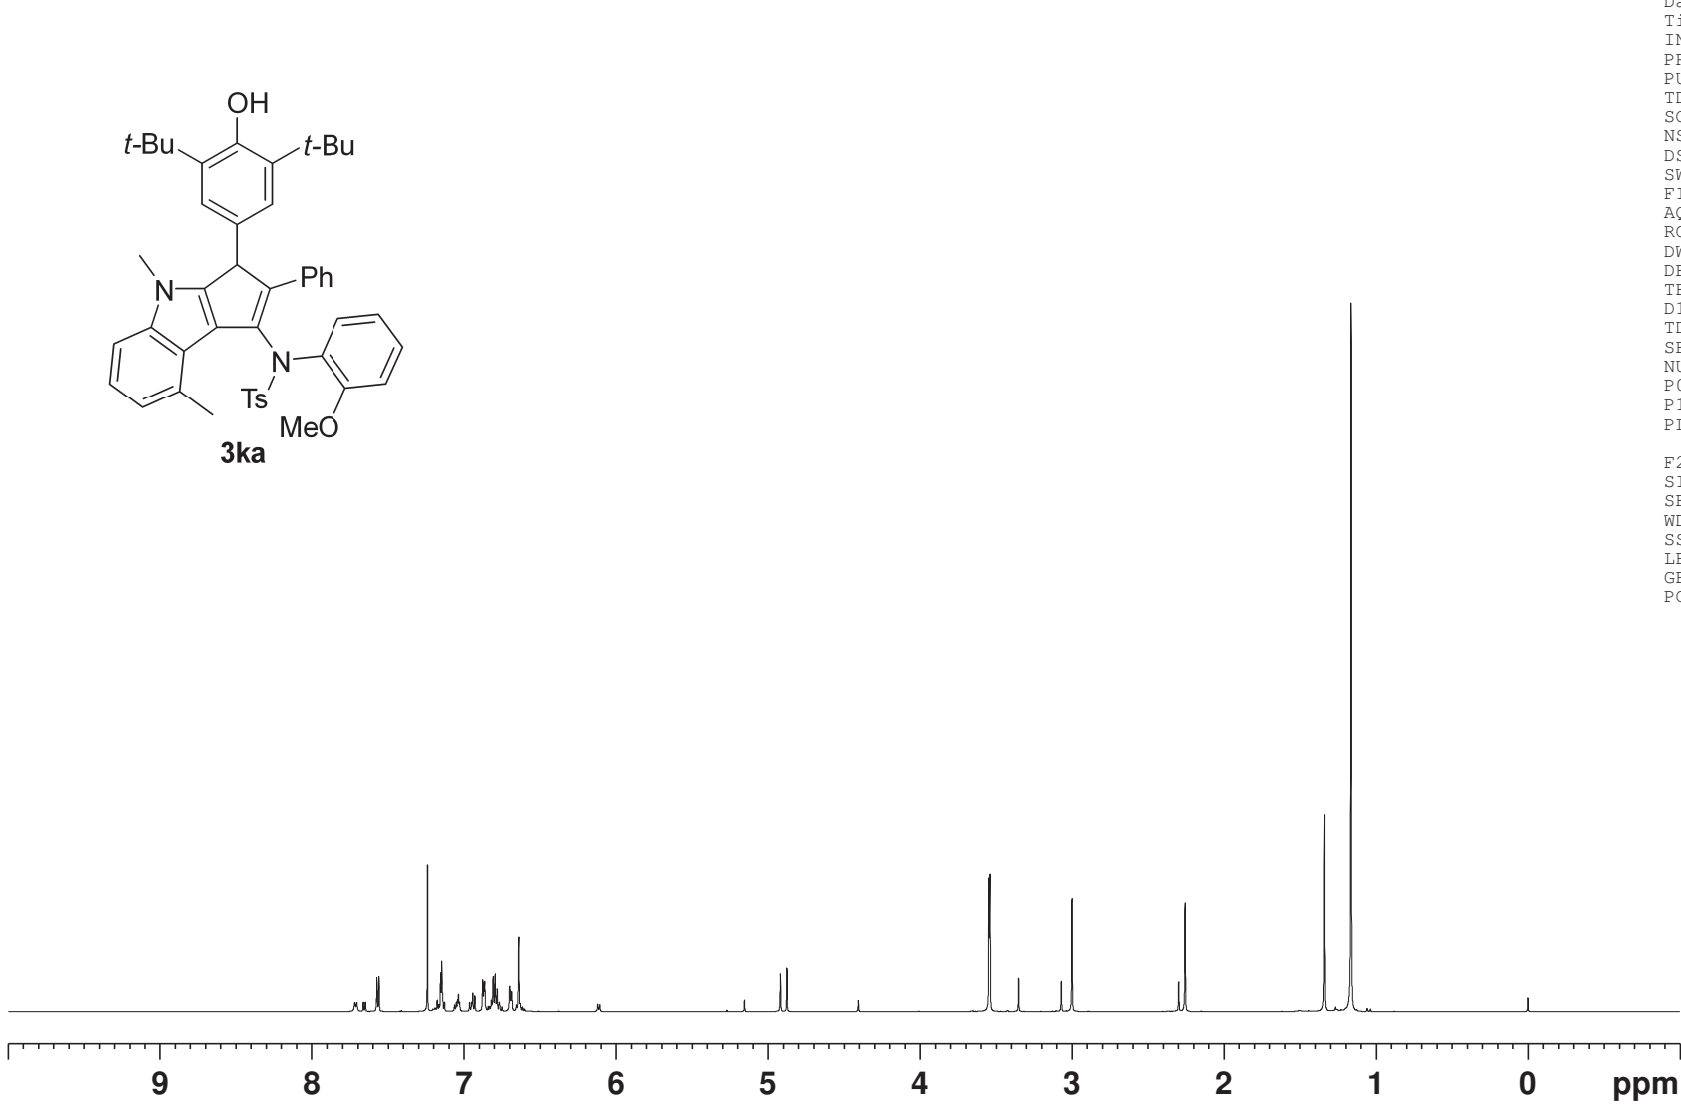

0.97  
0.52  
1.97  
3.78  
1.53  
1.54  
2.41  
4.57  
2.01  
2.85  
0.48  
0.25  
1.00  
0.99  
0.24  
6.76  
0.73  
0.74  
2.94  
0.75  
2.96  
4.48  
18.08

S101

Current Data Parameters  
 NAME yuky2463 3ba  
 EXPNO 10  
 PROCNO 1

F2 - Acquisition Parameters  
 Date\_ 20201128  
 Time 5.14 h  
 INSTRUM Avance  
 PROBHD z168773\_0004 (  
 PULPROG zg30  
 TD 65536  
 SOLVENT CDCl3  
 NS 16  
 DS 2  
 SWH 11904.762 Hz  
 FIDRES 0.363304 Hz  
 AQ 2.7525120 sec  
 RG 47.619  
 DW 42.000 usec  
 DE 13.73 usec  
 TE 298.0 K  
 D1 1.00000000 sec  
 TD0 1  
 SFO1 600.1337058 MHz  
 NUC1 1H  
 P0 3.94 usec  
 P1 11.82 usec  
 PLW1 31.62299919 W

F2 - Processing parameters  
 SI 65536  
 SF 600.1300253 MHz  
 WDW EM  
 SSB 0  
 LB 0.30 Hz  
 GB 0  
 PC 1.00

152.66  
152.43  
150.34  
141.86  
141.81  
141.35  
139.51  
137.24  
136.22  
135.77  
134.56  
133.81  
131.74  
129.16  
129.03  
128.58  
128.25  
127.88  
127.83  
126.92  
126.71  
126.44  
126.41  
126.20  
125.68  
125.35  
124.89  
124.43  
122.03  
122.01  
121.63  
120.96  
120.88  
120.68  
112.21  
106.81  
106.63  
77.21  
77.00  
76.79  
54.43  
51.55  
49.78  
34.26  
34.06  
30.80  
30.67  
30.35  
30.16  
22.84  
22.79  
21.37  
21.31

Current Data Parameters  
 NAME yuky2463 3ba  
 EXPNO 11  
 PROCNO 1

F2 - Acquisition Parameters  
 Date\_ 20201128  
 Time 8.11 h  
 INSTRUM Avance  
 PROBHD Z168773\_0004 (  
 PULPROG zgpg30  
 TD 65536  
 SOLVENT CDCl3  
 NS 3600  
 DS 4  
 SWH 37037.035 Hz  
 FIDRES 1.130281 Hz  
 AQ 0.8847360 sec  
 RG 101  
 DW 13.500 usec  
 DE 18.00 usec  
 TE 298.1 K  
 D1 2.00000000 sec  
 D11 0.03000000 sec  
 TD0 1  
 SFO1 150.9194079 MHz  
 NUC1 13C  
 P0 6.13 usec  
 P1 18.38 usec  
 PLW1 76.86299896 W  
 SFO2 600.1324005 MHz  
 NUC2 1H  
 CPDPRG[2] waltz65  
 PCPD2 70.00 usec  
 PLW2 31.62299919 W  
 PLW12 0.94957000 W  
 PLW13 0.47762999 W

F2 - Processing parameters  
 SI 32768  
 SF 150.9028167 MHz  
 WDW EM  
 SSB 0  
 LB 1.00 Hz  
 GB 0  
 PC 1.40

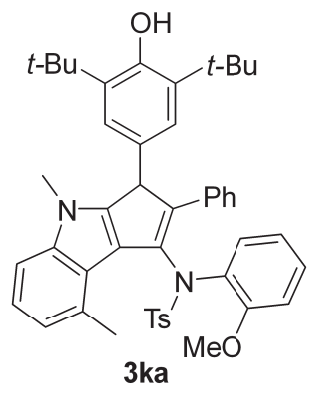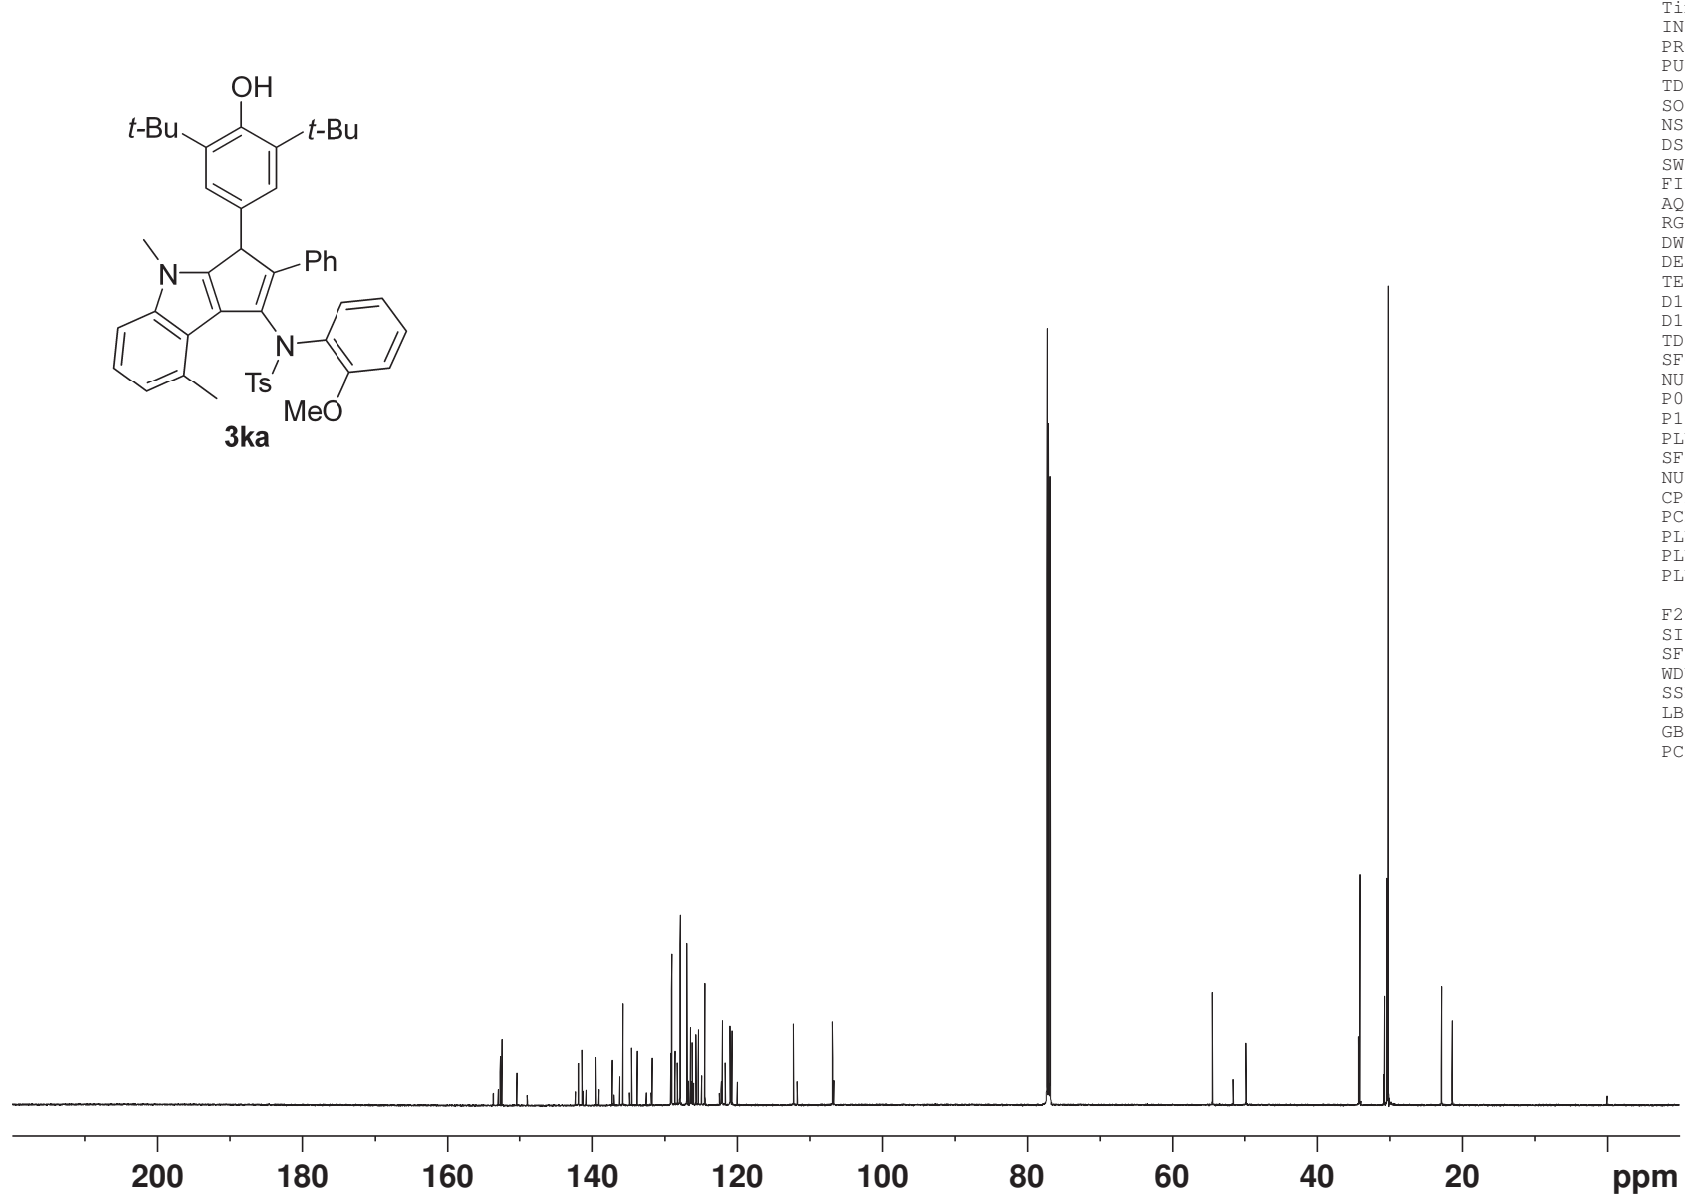

7.891  
7.878  
7.636  
7.622  
7.581  
7.568  
7.486  
7.473  
7.457  
7.445  
7.302  
7.288  
7.251  
7.245  
7.237  
7.162  
7.149  
7.136  
7.078  
7.071  
7.065  
7.053  
7.040  
7.027  
6.915  
6.902  
6.867  
6.853  
6.849  
6.841  
6.835  
6.814  
6.802  
6.796  
6.784  
6.772  
6.691  
6.678  
6.650  
6.095  
6.082  
5.199  
4.924  
4.894  
4.414  
3.544  
3.536  
3.525  
3.227  
2.274  
2.234  
1.346  
1.170

```

Current Data Parameters
NAME      yuky2465 3ga
EXPNO     10
PROCNO    1

F2 - Acquisition Parameters
Date_     20201128
Time      1.41 h
INSTRUM   Avance
PROBHD    Z168773_0004 (
PULPROG   zg30
TD         65536
SOLVENT   CDC13
NS         16
DS         2
SWH        11904.762 Hz
FIDRES     0.363304 Hz
AQ         2.7525120 sec
RG         47.619
DW         42.000 usec
DE         13.73 usec
TE         298.1 K
D1         1.00000000 sec
TD0        1
SFO1       600.1337058 MHz
NUC1       1H
P0         3.94 usec
P1         11.82 usec
PLW1       31.62299919 W

F2 - Processing parameters
SI         65536
SF         600.1300233 MHz
WDW        EM
SSB        0
LB         0.30 Hz
GB         0
PC         1.00
  
```

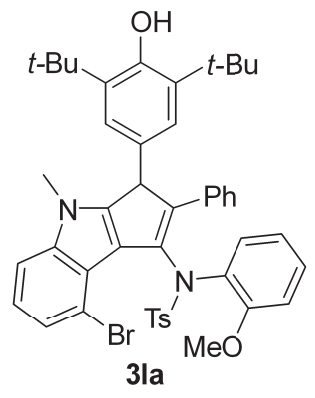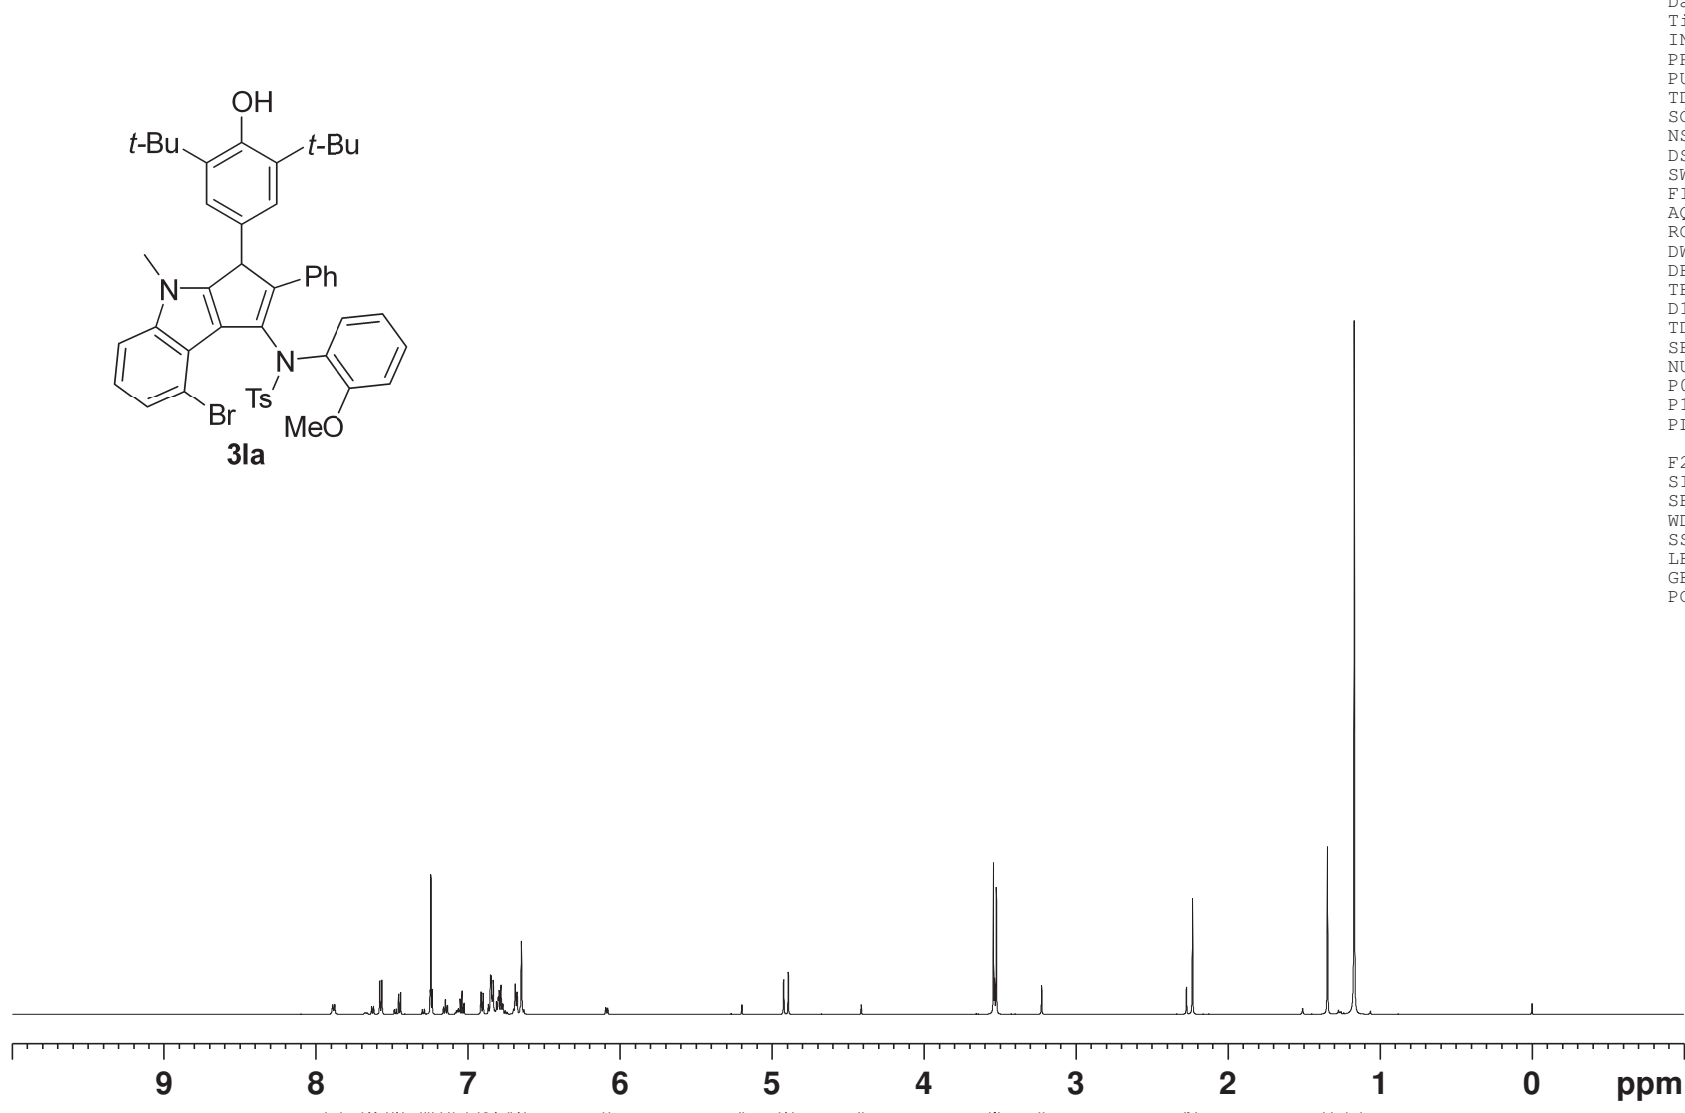

0.95  
0.20  
0.47  
1.95  
0.24  
0.96  
0.24  
3.42  
1.00  
1.51  
1.49  
3.81  
3.20  
2.27  
2.49  
0.46  
0.23  
1.01  
1.00  
0.23  
2.98  
0.69  
2.96  
0.69  
0.68  
2.94  
4.30  
18.15



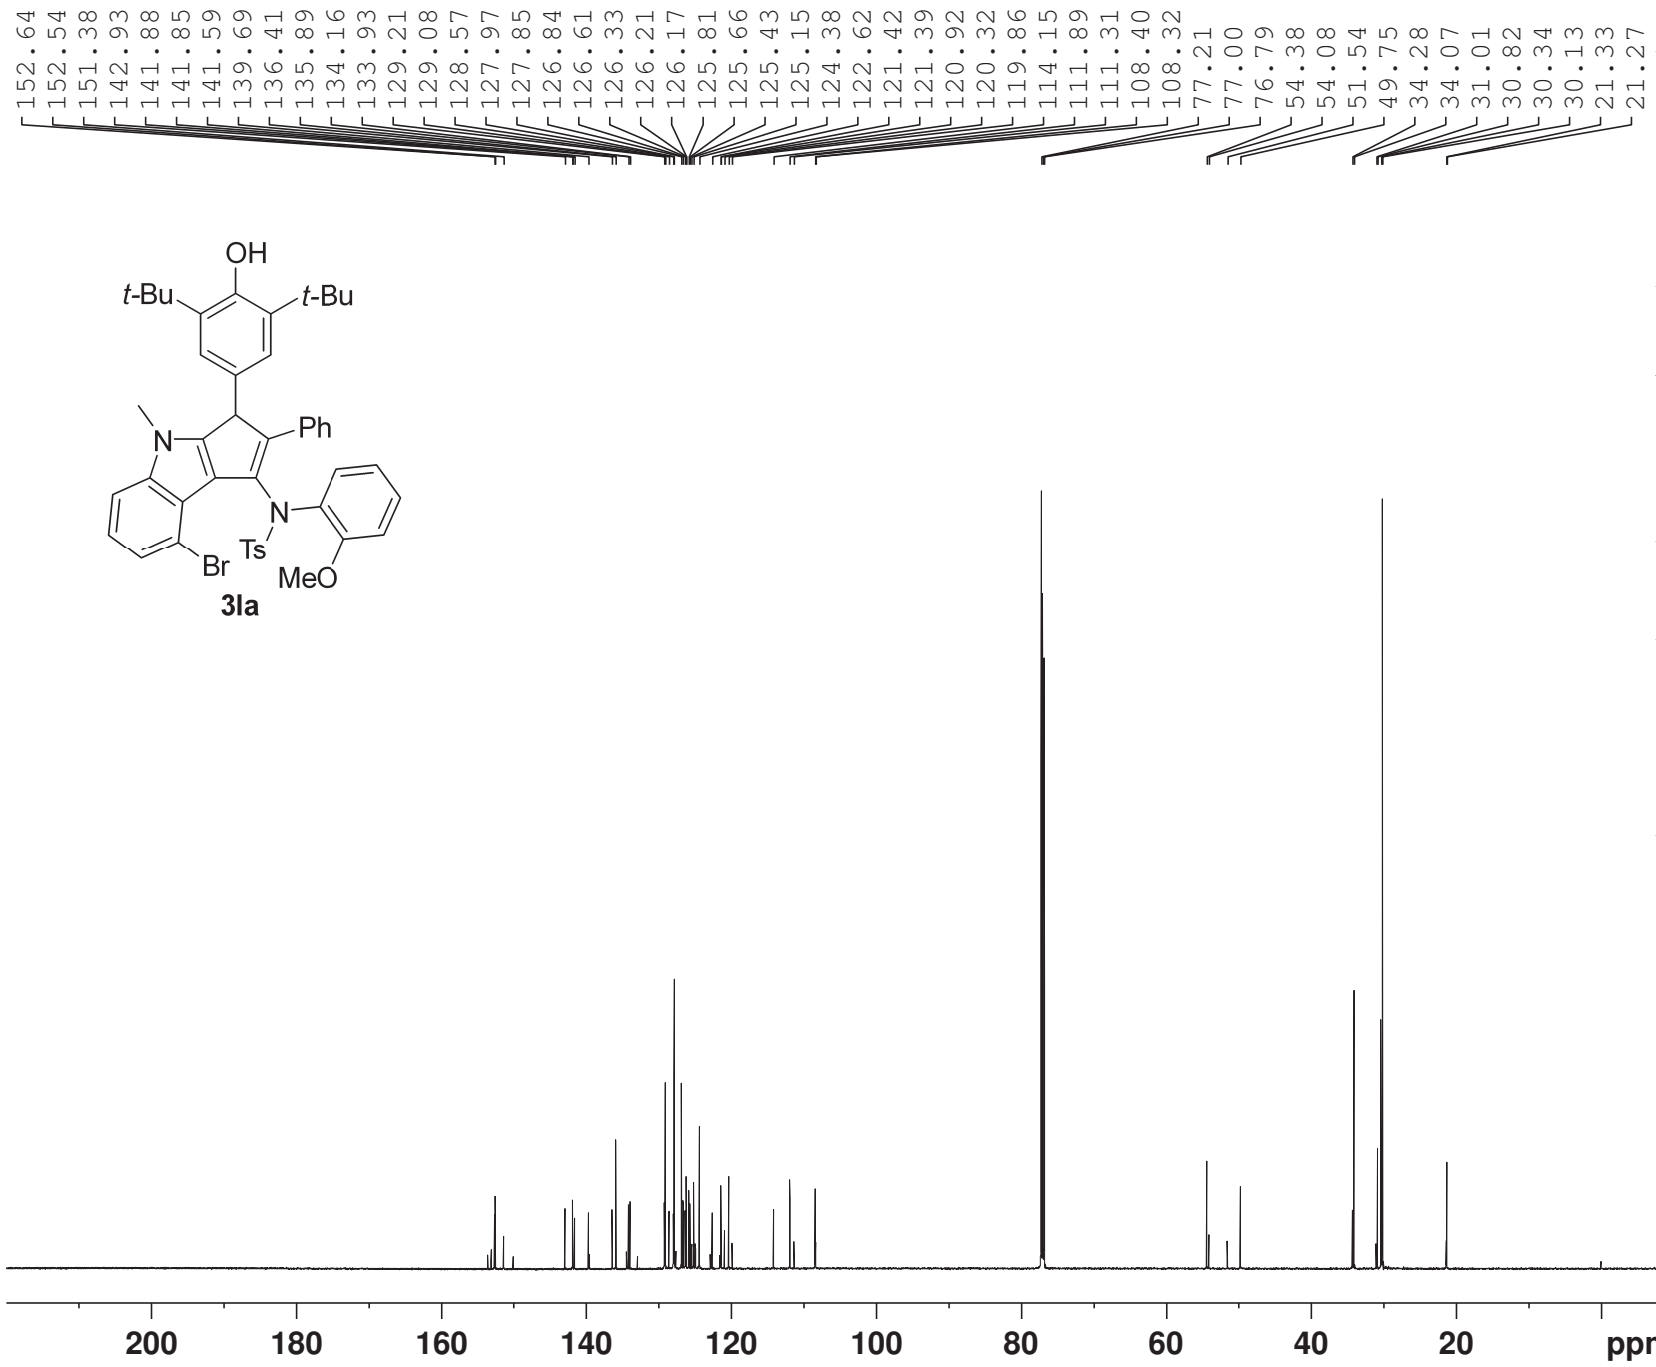

```

Current Data Parameters
NAME      yuky2465 3ga
EXPNO     11
PROCNO    1

F2 - Acquisition Parameters
Date_     20201128
Time      4.38 h
INSTRUM   Avance
PROBHD    Z168773_0004 (
PULPROG   zgpg30
TD        65536
SOLVENT   CDCl3
NS        3600
DS        4
SWH       37037.035 Hz
FIDRES    1.130281 Hz
AQ        0.8847360 sec
RG        101
DW        13.500 usec
DE        18.00 usec
TE        298.0 K
D1        2.00000000 sec
D11       0.03000000 sec
TD0       1
SFO1      150.9194079 MHz
NUC1      13C
P0        6.13 usec
P1        18.38 usec
PLW1      76.86299896 W
SFO2      600.1324005 MHz
NUC2      1H
CPDPRG[2] waltz65
PCPD2     70.00 usec
PLW2      31.62299919 W
PLW12     0.94957000 W
PLW13     0.47762999 W

F2 - Processing parameters
SI        32768
SF        150.9028178 MHz
WDW       EM
SSB       0
LB        1.00 Hz
GB        0
PC        1.40

```

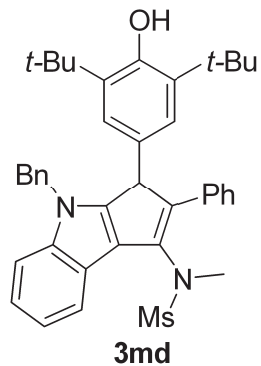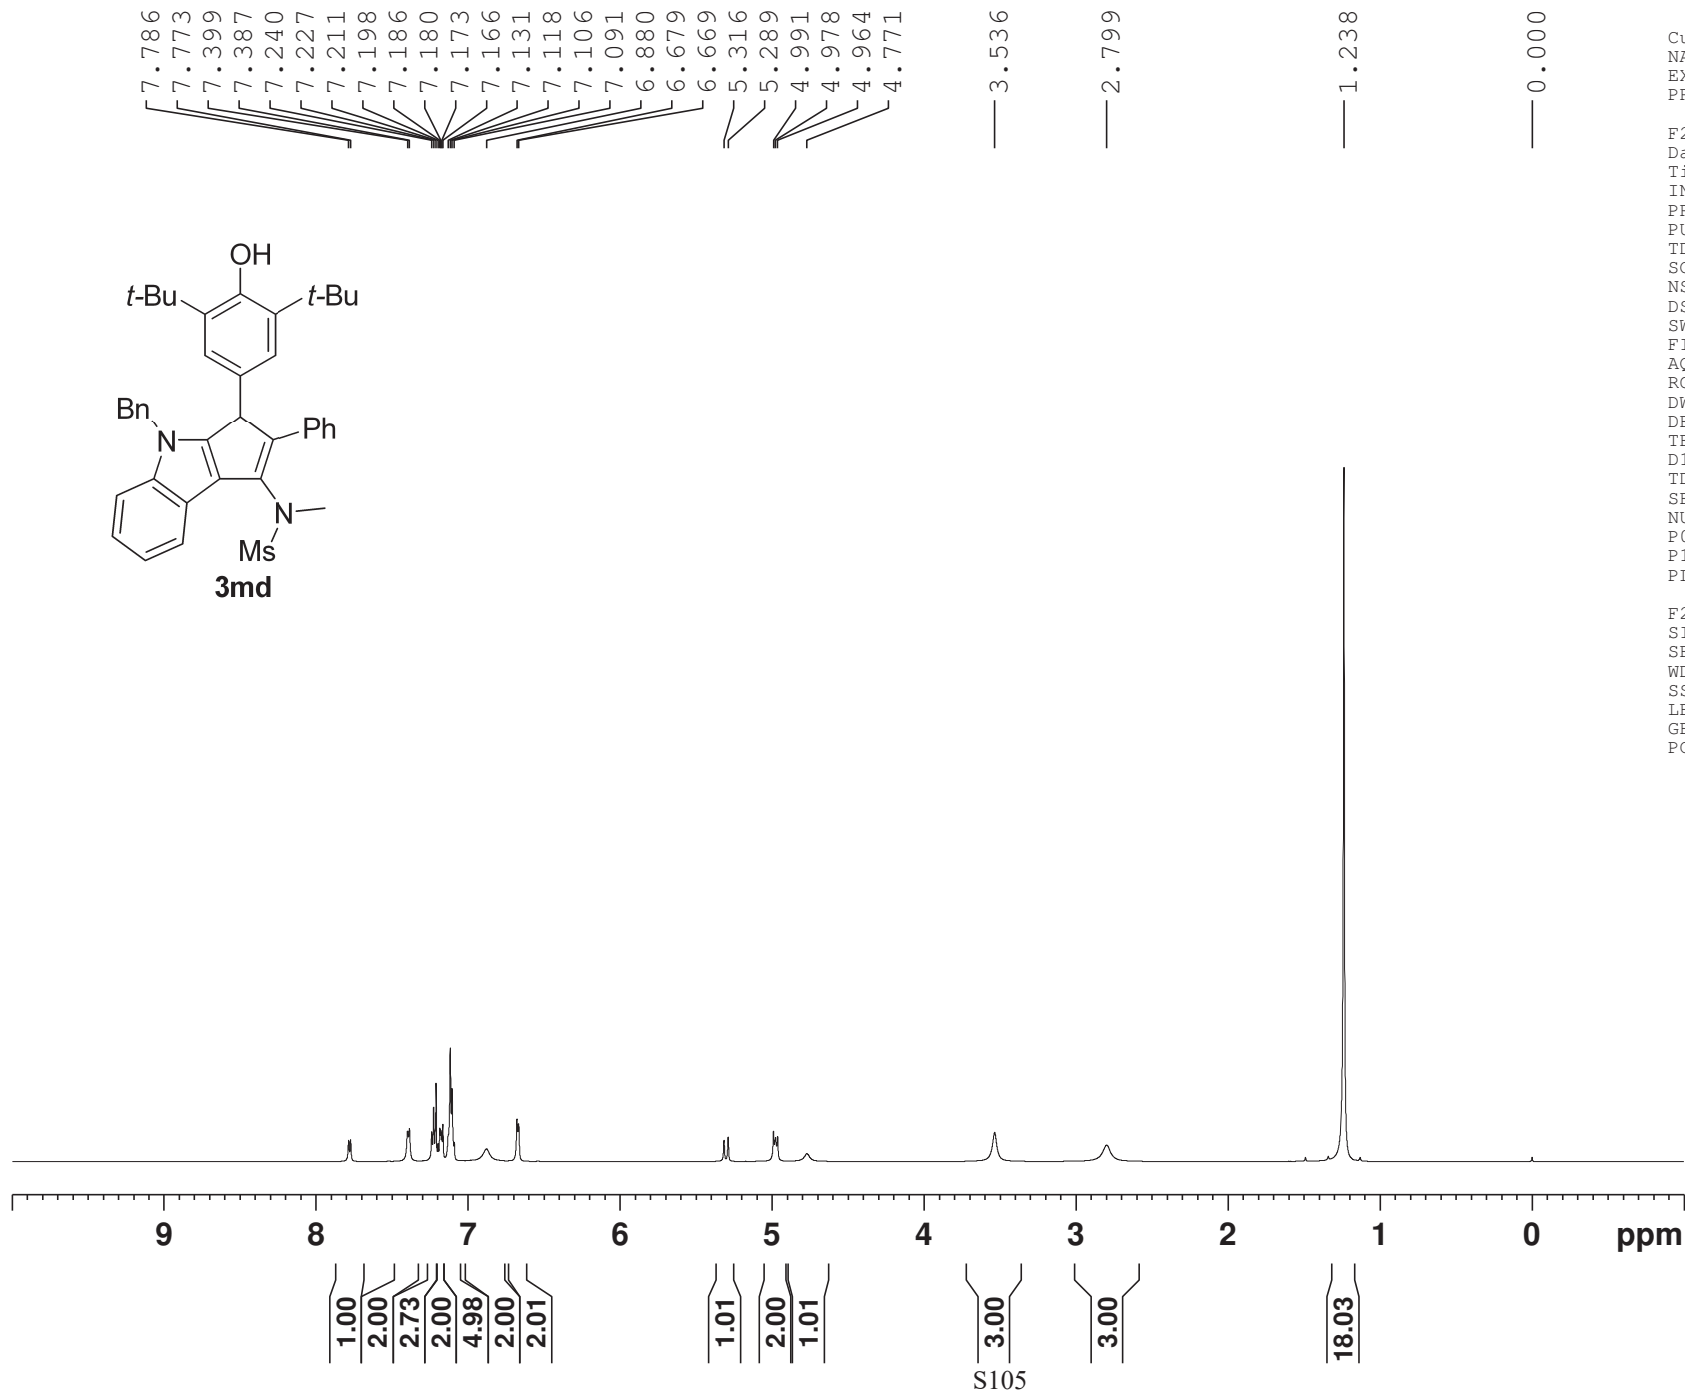

Current Data Parameters  
 NAME yuky2472-3 3nd  
 EXPNO 10  
 PROCNO 1

F2 - Acquisition Parameters  
 Date\_ 20201123  
 Time 22.49 h  
 INSTRUM Avance  
 PROBHD z168773\_0004 (  
 PULPROG zg30  
 TD 65536  
 SOLVENT CDCl3  
 NS 16  
 DS 2  
 SWH 11904.762 Hz  
 FIDRES 0.363304 Hz  
 AQ 2.7525120 sec  
 RG 29.5786  
 DW 42.000 usec  
 DE 13.73 usec  
 TE 298.0 K  
 D1 1.00000000 sec  
 TD0 1  
 SFO1 600.1337058 MHz  
 NUC1 1H  
 P0 3.94 usec  
 P1 11.82 usec  
 PLW1 31.62299919 W

F2 - Processing parameters  
 SI 65536  
 SF 600.1300440 MHz  
 WDW EM  
 SSB 0  
 LB 0.30 Hz  
 GB 0  
 PC 1.00



152.79  
151.85  
140.39  
136.42  
136.36  
135.12  
134.93  
128.42  
128.13  
128.08  
127.28  
126.62  
126.37  
125.86  
124.52  
121.01  
120.71  
120.43  
119.61  
117.51  
110.65  
77.21  
77.00  
76.79

50.72  
48.25  
39.29  
37.06  
34.15  
30.12

Current Data Parameters  
NAME yuky2472-3 3rd  
EXPNO 11  
PROCNO 1

F2 - Acquisition Parameters  
Date\_ 20201124  
Time 0.27 h  
INSTRUM Avance  
PROBHD Z168773\_0004 (  
PULPROG zgpg30  
TD 65536  
SOLVENT CDCl3  
NS 2000  
DS 4  
SWH 37037.035 Hz  
FIDRES 1.130281 Hz  
AQ 0.8847360 sec  
RG 101  
DW 13.500 usec  
DE 18.00 usec  
TE 298.0 K  
D1 2.00000000 sec  
D11 0.03000000 sec  
TD0 1  
SFO1 150.9194079 MHz  
NUC1 13C  
P0 6.13 usec  
P1 18.38 usec  
PLW1 76.86299896 W  
SFO2 600.1324005 MHz  
NUC2 1H  
CPDPRG[2] waltz65  
PCPD2 70.00 usec  
PLW2 31.62299919 W  
PLW12 0.94957000 W  
PLW13 0.47762999 W

F2 - Processing parameters  
SI 32768  
SF 150.9028262 MHz  
WDW EM  
SSB 0  
LB 1.00 Hz  
GB 0  
PC 1.40

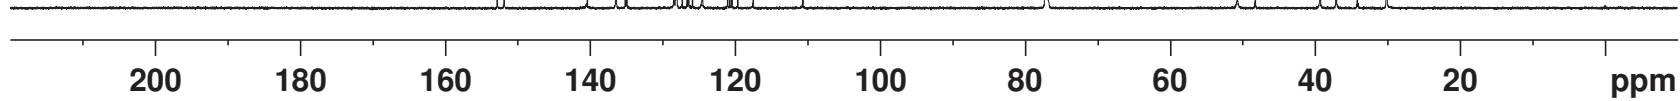

S106

7.758  
7.403  
7.390  
7.275  
7.260  
7.243  
7.232  
7.213  
7.203  
7.201  
7.191  
7.189  
7.179  
7.177  
7.167  
7.165  
7.151  
7.139  
7.126  
6.882  
5.451  
5.441  
5.433  
5.423  
5.027  
4.946  
4.928  
4.819  
4.792  
4.617  
4.610  
4.590  
4.583  
4.487  
4.477  
4.459  
4.449  
3.518  
2.782

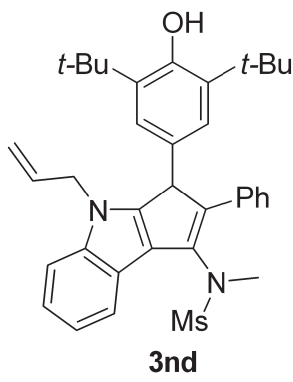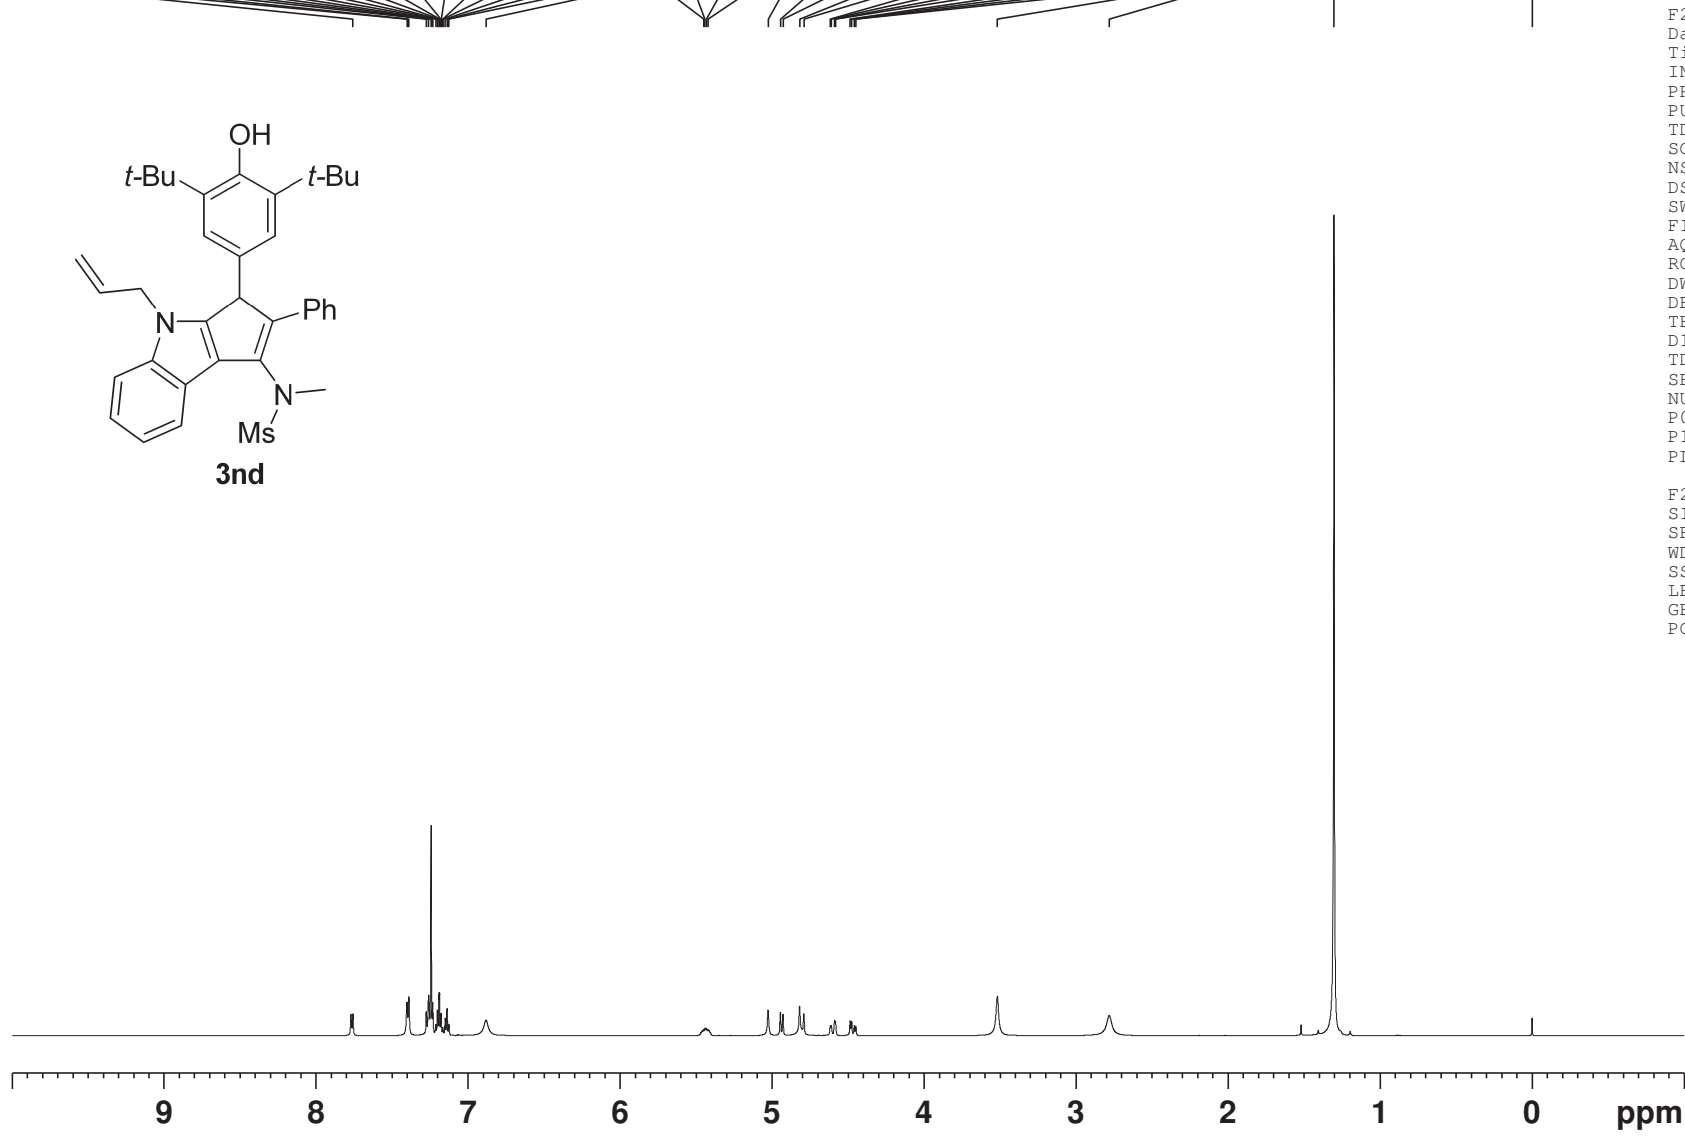

1.00  
2.00  
4.59  
2.03  
1.00  
2.00  
0.98  
1.00  
1.05  
2.00  
1.02  
1.02  
3.00  
3.00  
18.02

S107

Current Data Parameters  
 NAME yuky2472-4 3od  
 EXPNO 11  
 PROCNO 1

F2 - Acquisition Parameters  
 Date\_ 20201120  
 Time 11.35 h  
 INSTRUM Avance  
 PROBHD z168773\_0004 (  
 PULPROG zg30  
 TD 65536  
 SOLVENT CDCl3  
 NS 16  
 DS 2  
 SWH 11904.762 Hz  
 FIDRES 0.363304 Hz  
 AQ 2.7525120 sec  
 RG 47.619  
 DW 42.000 usec  
 DE 13.73 usec  
 TE 298.1 K  
 D1 1.00000000 sec  
 TD0 1  
 SFO1 600.1337058 MHz  
 NUC1 1H  
 P0 3.94 usec  
 P1 11.82 usec  
 PLW1 31.62299919 W

F2 - Processing parameters  
 SI 65536  
 SF 600.1300253 MHz  
 WDW EM  
 SSB 0  
 LB 0.30 Hz  
 GB 0  
 PC 1.00

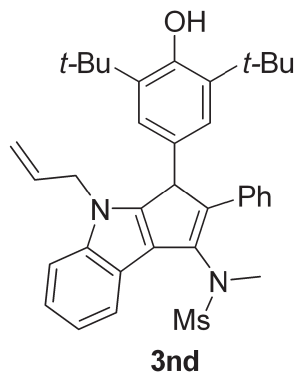

152.78  
151.39  
140.67  
140.10  
136.34  
135.03  
132.01  
128.14  
126.63  
125.87  
124.65  
120.89  
120.60  
120.32  
119.65  
117.55  
116.87  
110.38

77.21  
77.00  
76.79

50.68  
46.88  
39.27  
37.07  
34.22  
30.21

Current Data Parameters  
NAME yuky2472-4 3od  
EXPNO 12  
PROCNO 1

F2 - Acquisition Parameters  
Date\_ 20201120  
Time 14.27 h  
INSTRUM Avance  
PROBHD Z168773\_0004 (  
PULPROG zgpg30  
TD 65536  
SOLVENT CDCl3  
NS 3500  
DS 4  
SWH 37037.035 Hz  
FIDRES 1.130281 Hz  
AQ 0.8847360 sec  
RG 101  
DW 13.500 usec  
DE 18.00 usec  
TE 298.0 K  
D1 2.00000000 sec  
D11 0.03000000 sec  
TD0 1  
SFO1 150.9194079 MHz  
NUC1 13C  
P0 6.13 usec  
P1 18.38 usec  
PLW1 76.86299896 W  
SFO2 600.1324005 MHz  
NUC2 1H  
CPDPRG[2] waltz65  
PCPD2 70.00 usec  
PLW2 31.62299919 W  
PLW12 0.94957000 W  
PLW13 0.47762999 W

F2 - Processing parameters  
SI 32768  
SF 150.9028170 MHz  
WDW EM  
SSB 0  
LB 1.00 Hz  
GB 0  
PC 1.40

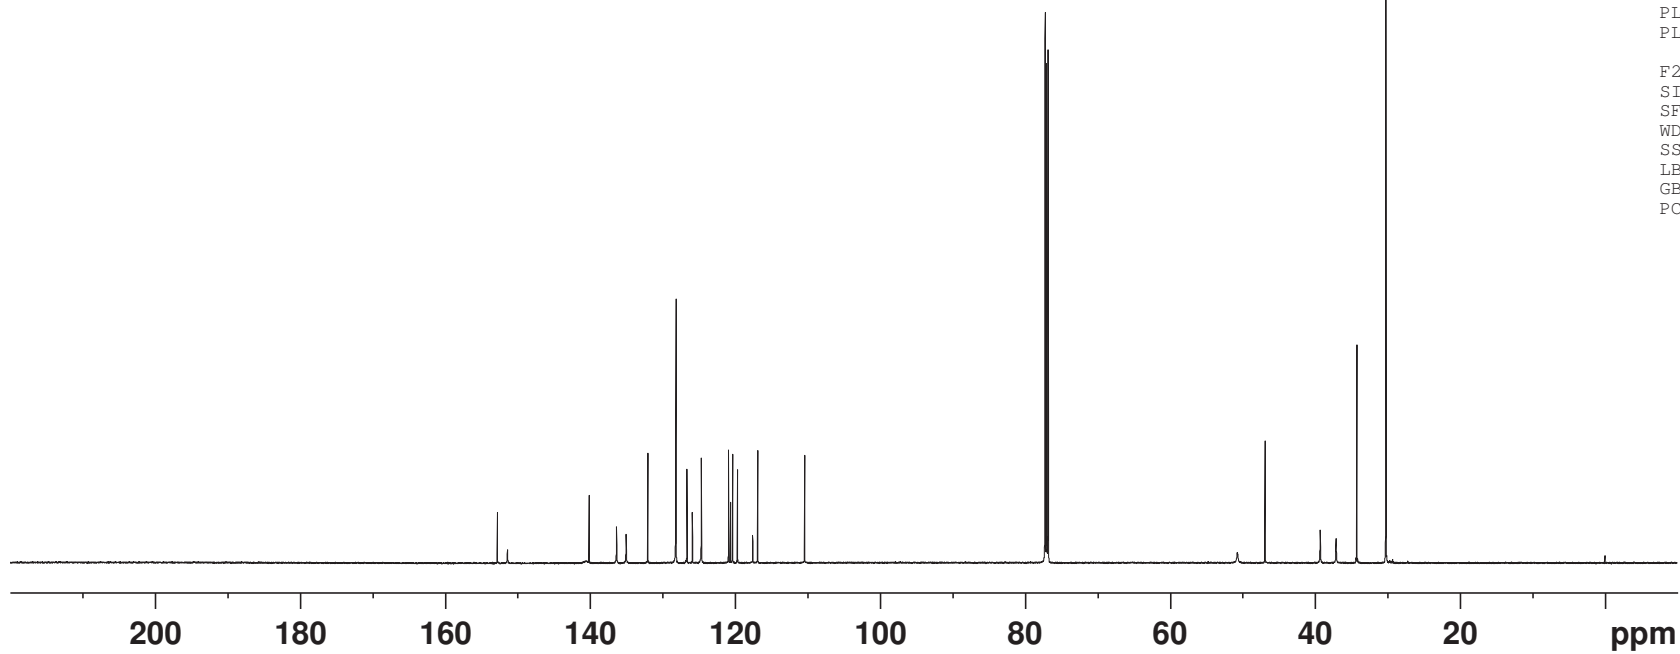

S108

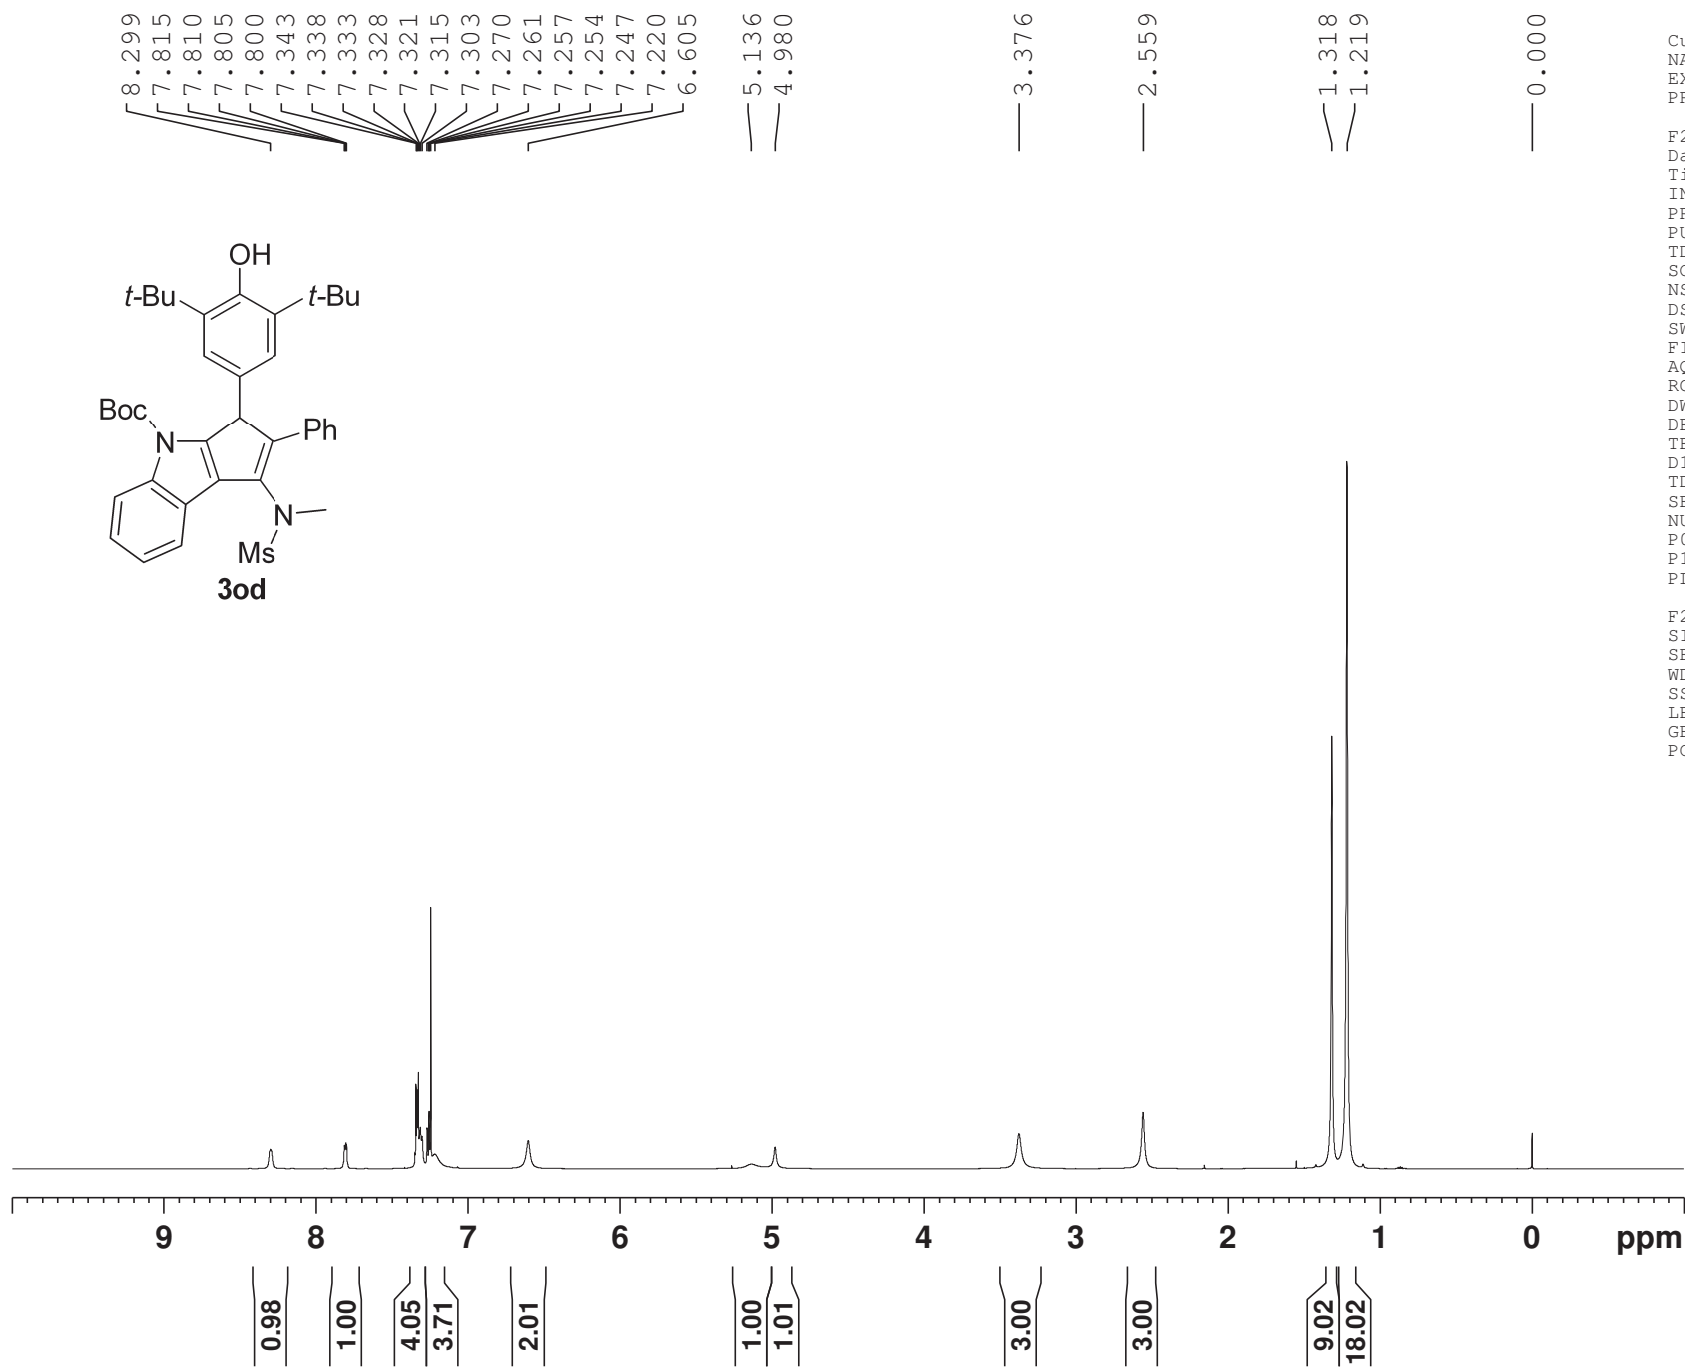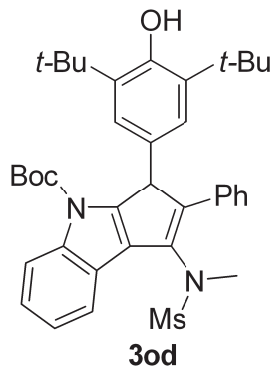

Current Data Parameters  
 NAME yuky2472-5 3md  
 EXPNO 10  
 PROCNO 1

F2 - Acquisition Parameters  
 Date\_ 20201124  
 Time 0.58 h  
 INSTRUM Avance  
 PROBHD z168773\_0004 (  
 PULPROG zg30  
 TD 65536  
 SOLVENT CDCl3  
 NS 16  
 DS 2  
 SWH 11904.762 Hz  
 FIDRES 0.363304 Hz  
 AQ 2.7525120 sec  
 RG 28.8337  
 DW 42.000 usec  
 DE 13.73 usec  
 TE 298.0 K  
 D1 1.00000000 sec  
 TD0 1  
 SFO1 600.1337058 MHz  
 NUC1 1H  
 P0 3.94 usec  
 P1 11.82 usec  
 PLW1 31.62299919 W

F2 - Processing parameters  
 SI 65536  
 SF 600.1300232 MHz  
 WDW EM  
 SSB 0  
 LB 0.30 Hz  
 GB 0  
 PC 1.00

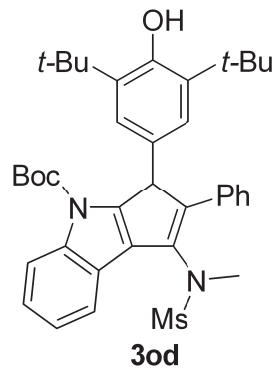

152.50  
149.21  
146.14  
140.03  
135.55  
134.65  
131.96  
129.26  
128.05  
127.49  
126.34  
126.14  
124.29  
123.92  
123.31  
122.91  
119.61  
115.93

83.56  
77.21  
77.00  
76.79

54.47

39.61  
37.60  
34.08  
30.11  
27.65

Current Data Parameters  
NAME yuky2472-5 3md  
EXPNO 11  
PROCNO 1

F2 - Acquisition Parameters  
Date\_ 20201124  
Time 2.37 h  
INSTRUM Avance  
PROBHD Z168773\_0004 (  
PULPROG zgpg30  
TD 65536  
SOLVENT CDC13  
NS 2000  
DS 4  
SWH 37037.035 Hz  
FIDRES 1.130281 Hz  
AQ 0.8847360 sec  
RG 101  
DW 13.500 usec  
DE 18.00 usec  
TE 298.0 K  
D1 2.00000000 sec  
D11 0.03000000 sec  
TD0 1  
SFO1 150.9194079 MHz  
NUC1 13C  
P0 6.13 usec  
P1 18.38 usec  
PLW1 76.86299896 W  
SFO2 600.1324005 MHz  
NUC2 1H  
CPDPRG[2] waltz65  
PCPD2 70.00 usec  
PLW2 31.62299919 W  
PLW12 0.94957000 W  
PLW13 0.47762999 W

F2 - Processing parameters  
SI 32768  
SF 150.9028199 MHz  
WDW EM  
SSB 0  
LB 1.00 Hz  
GB 0  
PC 1.40

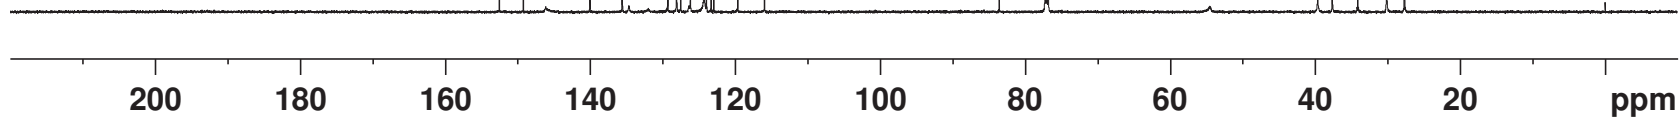

7.211  
7.208  
7.198  
7.195  
7.192  
7.180  
7.179  
7.161  
7.148  
7.142  
7.110  
7.096  
7.025  
7.016  
7.013  
7.003  
6.991  
6.989  
6.961  
6.960  
6.948  
6.936  
6.935  
6.918  
6.916  
6.906  
6.903  
6.749  
6.736  
6.723  
5.320  
5.307  
5.294  
3.748  
3.566

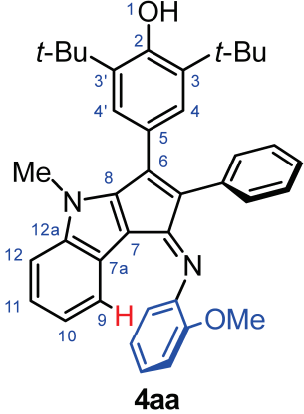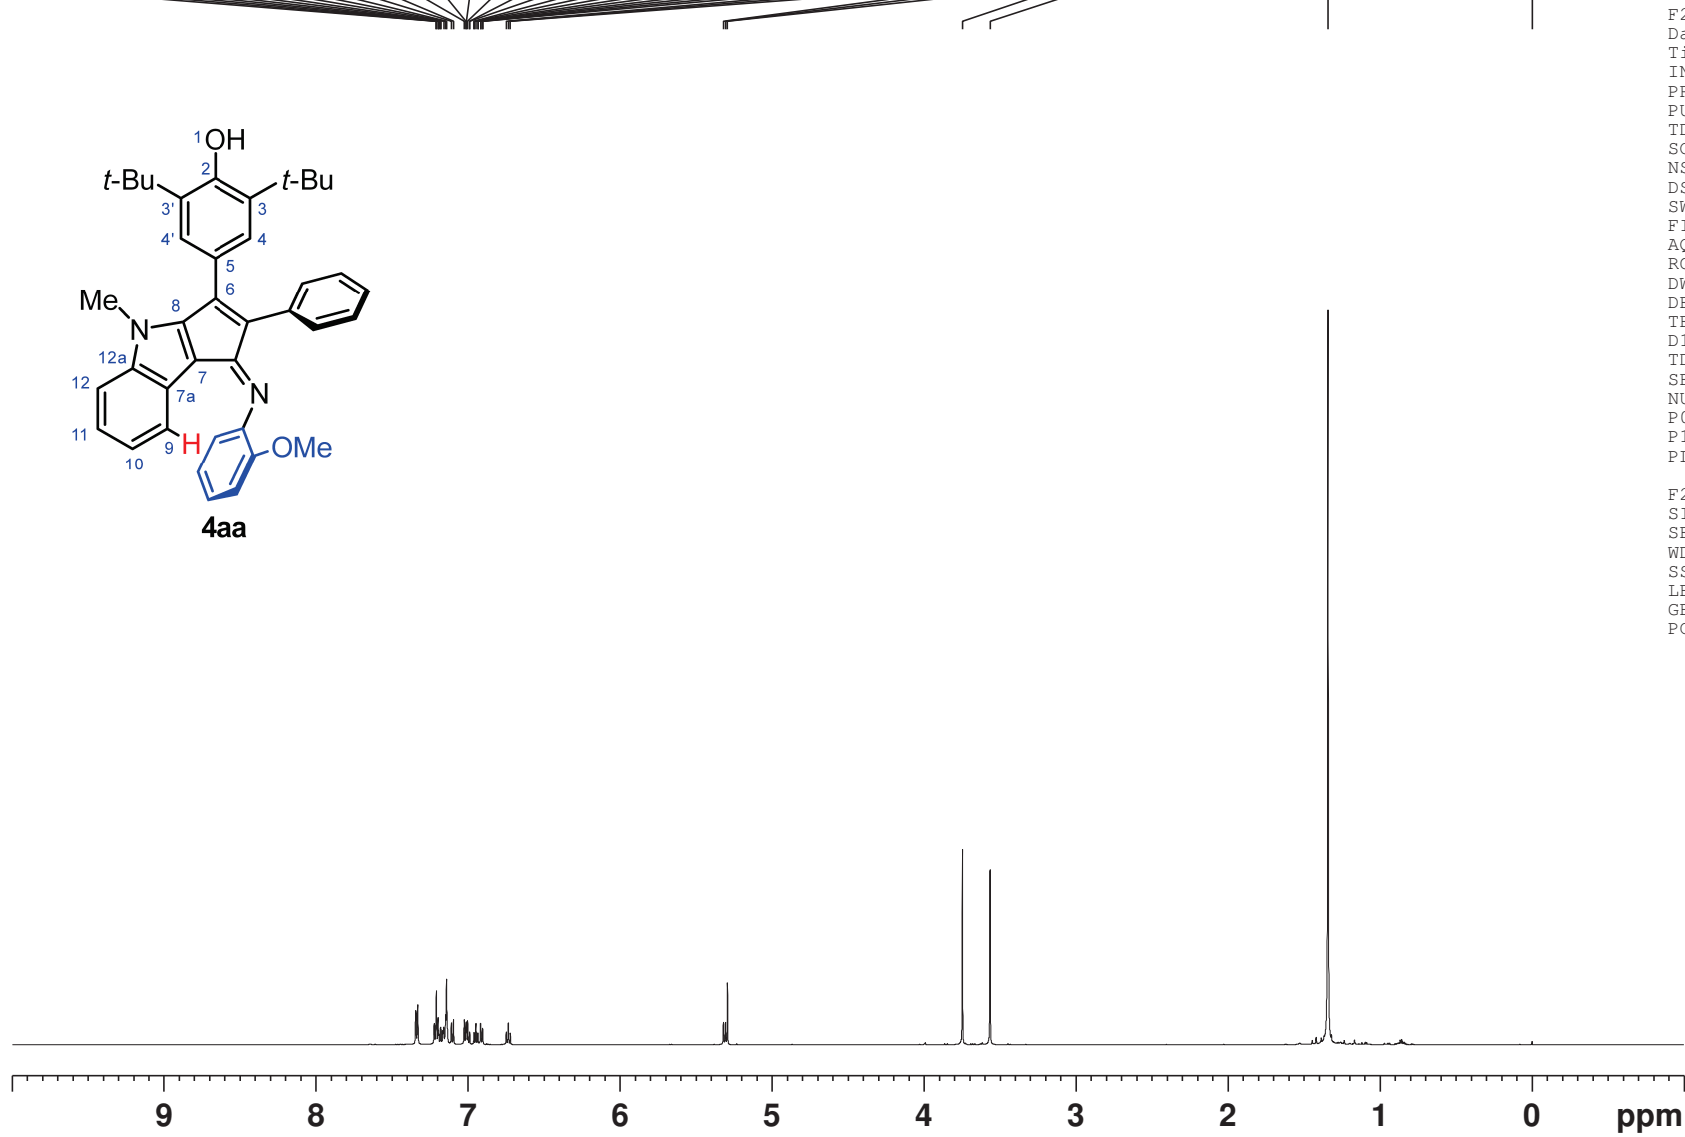

2.01  
3.17  
3.13  
1.01  
2.05  
1.04  
1.00  
1.00

1.00  
0.98

3.00  
3.00

18.02

S111

1.343

0.000

Current Data Parameters  
NAME yuky2503  
EXPNO 10  
PROCNO 1

F2 - Acquisition Parameters  
Date\_ 20201220  
Time 5.24 h  
INSTRUM Avance  
PROBHD z168773\_0004 (  
PULPROG zg30  
TD 65536  
SOLVENT CDCl3  
NS 16  
DS 2  
SWH 11904.762 Hz  
FIDRES 0.363304 Hz  
AQ 2.7525120 sec  
RG 24.681  
DW 42.000 usec  
DE 13.73 usec  
TE 298.0 K  
D1 1.00000000 sec  
TD0 1  
SFO1 600.1337058 MHz  
NUC1 1H  
P0 3.94 usec  
P1 11.82 usec  
PLW1 31.62299919 W

F2 - Processing parameters  
SI 65536  
SF 600.1300458 MHz  
WDW EM  
SSB 0  
LB 0.30 Hz  
GB 0  
PC 1.00



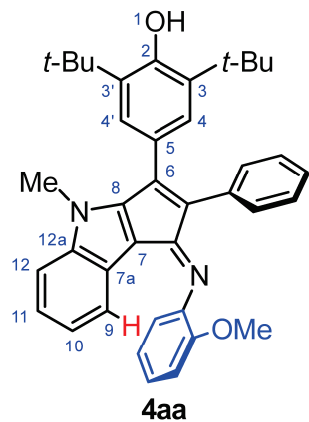

163.28  
155.00  
153.86  
150.23  
143.75  
141.90  
139.71  
138.98  
135.78  
133.42  
131.36  
127.35  
126.57  
126.42  
124.62  
123.46  
123.21  
121.73  
121.21  
120.84  
120.60  
119.93  
112.15  
109.66  
106.30  
77.21  
77.00  
76.79

— 56.02

34.28  
31.63  
30.20

Current Data Parameters  
NAME yuky2503  
EXPNO 11  
PROCNO 1

F2 - Acquisition Parameters  
Date\_ 20201220  
Time 5.54 h  
INSTRUM Avance  
PROBHD Z168773\_0004 (  
PULPROG zgpg30  
TD 65536  
SOLVENT CDCl3  
NS 600  
DS 4  
SWH 37037.035 Hz  
FIDRES 1.130281 Hz  
AQ 0.8847360 sec  
RG 101  
DW 13.500 usec  
DE 18.00 usec  
TE 298.1 K  
D1 2.00000000 sec  
D11 0.03000000 sec  
TD0 1  
SFO1 150.9194079 MHz  
NUC1 13C  
P0 6.13 usec  
P1 18.38 usec  
PLW1 76.86299896 W  
SFO2 600.1324005 MHz  
NUC2 1H  
CPDPRG[2] waltz65  
PCPD2 70.00 usec  
PLW2 31.62299919 W  
PLW12 0.94957000 W  
PLW13 0.47762999 W

F2 - Processing parameters  
SI 32768  
SF 150.9028255 MHz  
WDW EM  
SSB 0  
LB 1.00 Hz  
GB 0  
PC 1.40

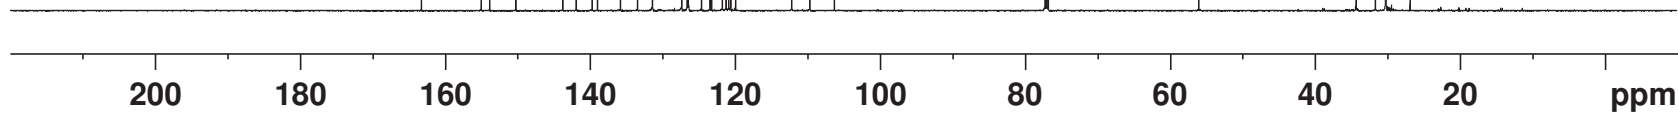

$^1\text{H}$ - $^1\text{H}$  COSY (600 MHz,  $\text{CDCl}_3$ )

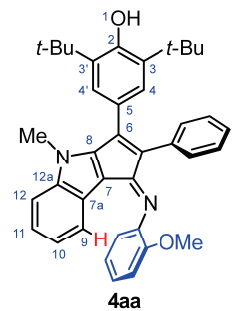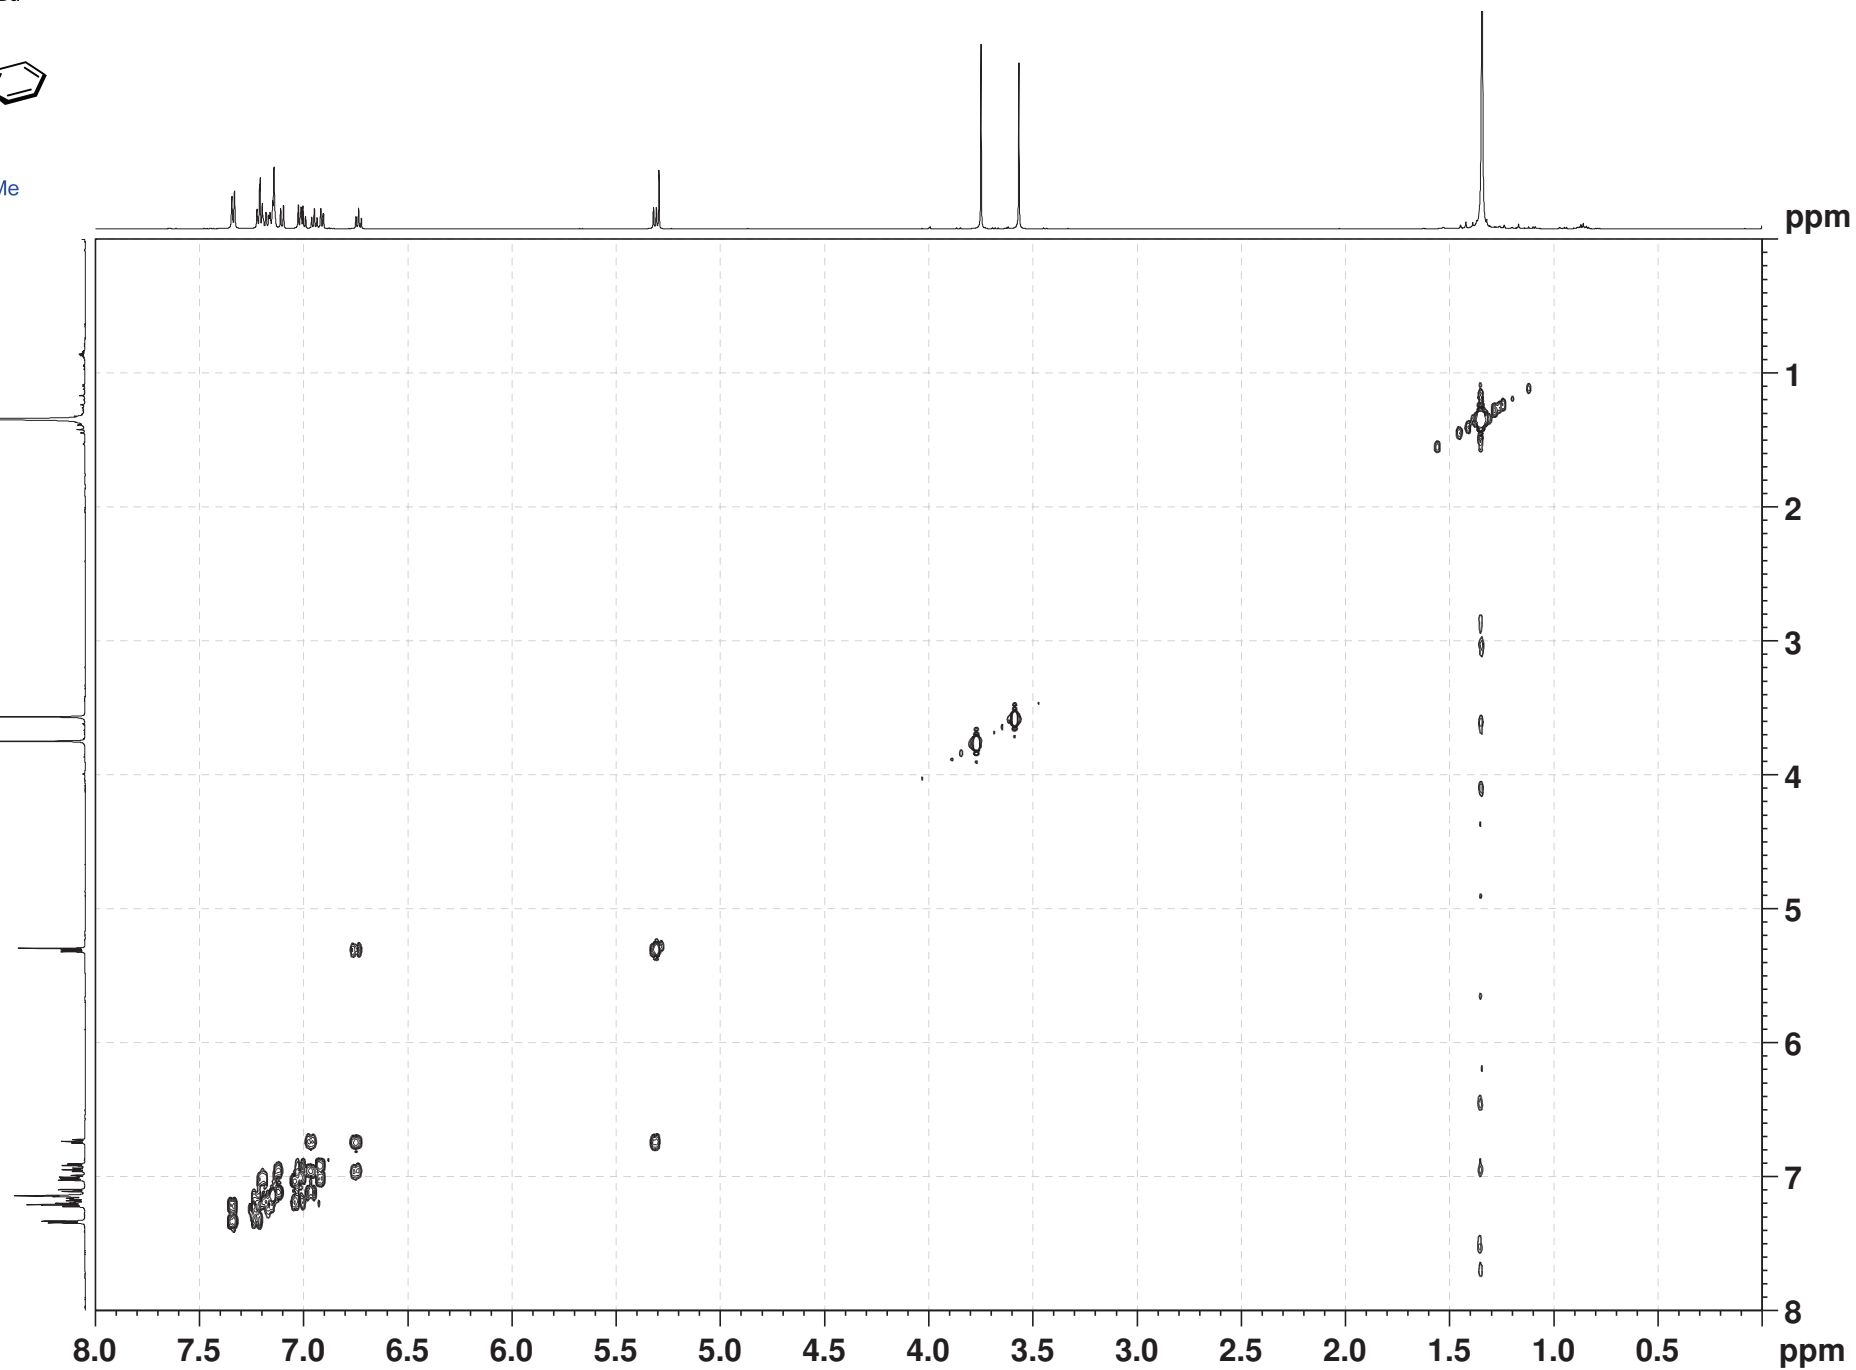

$^1\text{H}$ - $^1\text{H}$  COSY (600 MHz,  $\text{CDCl}_3$ )

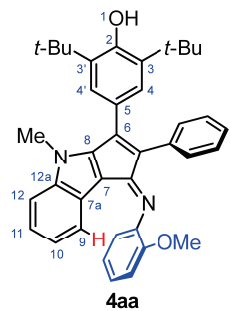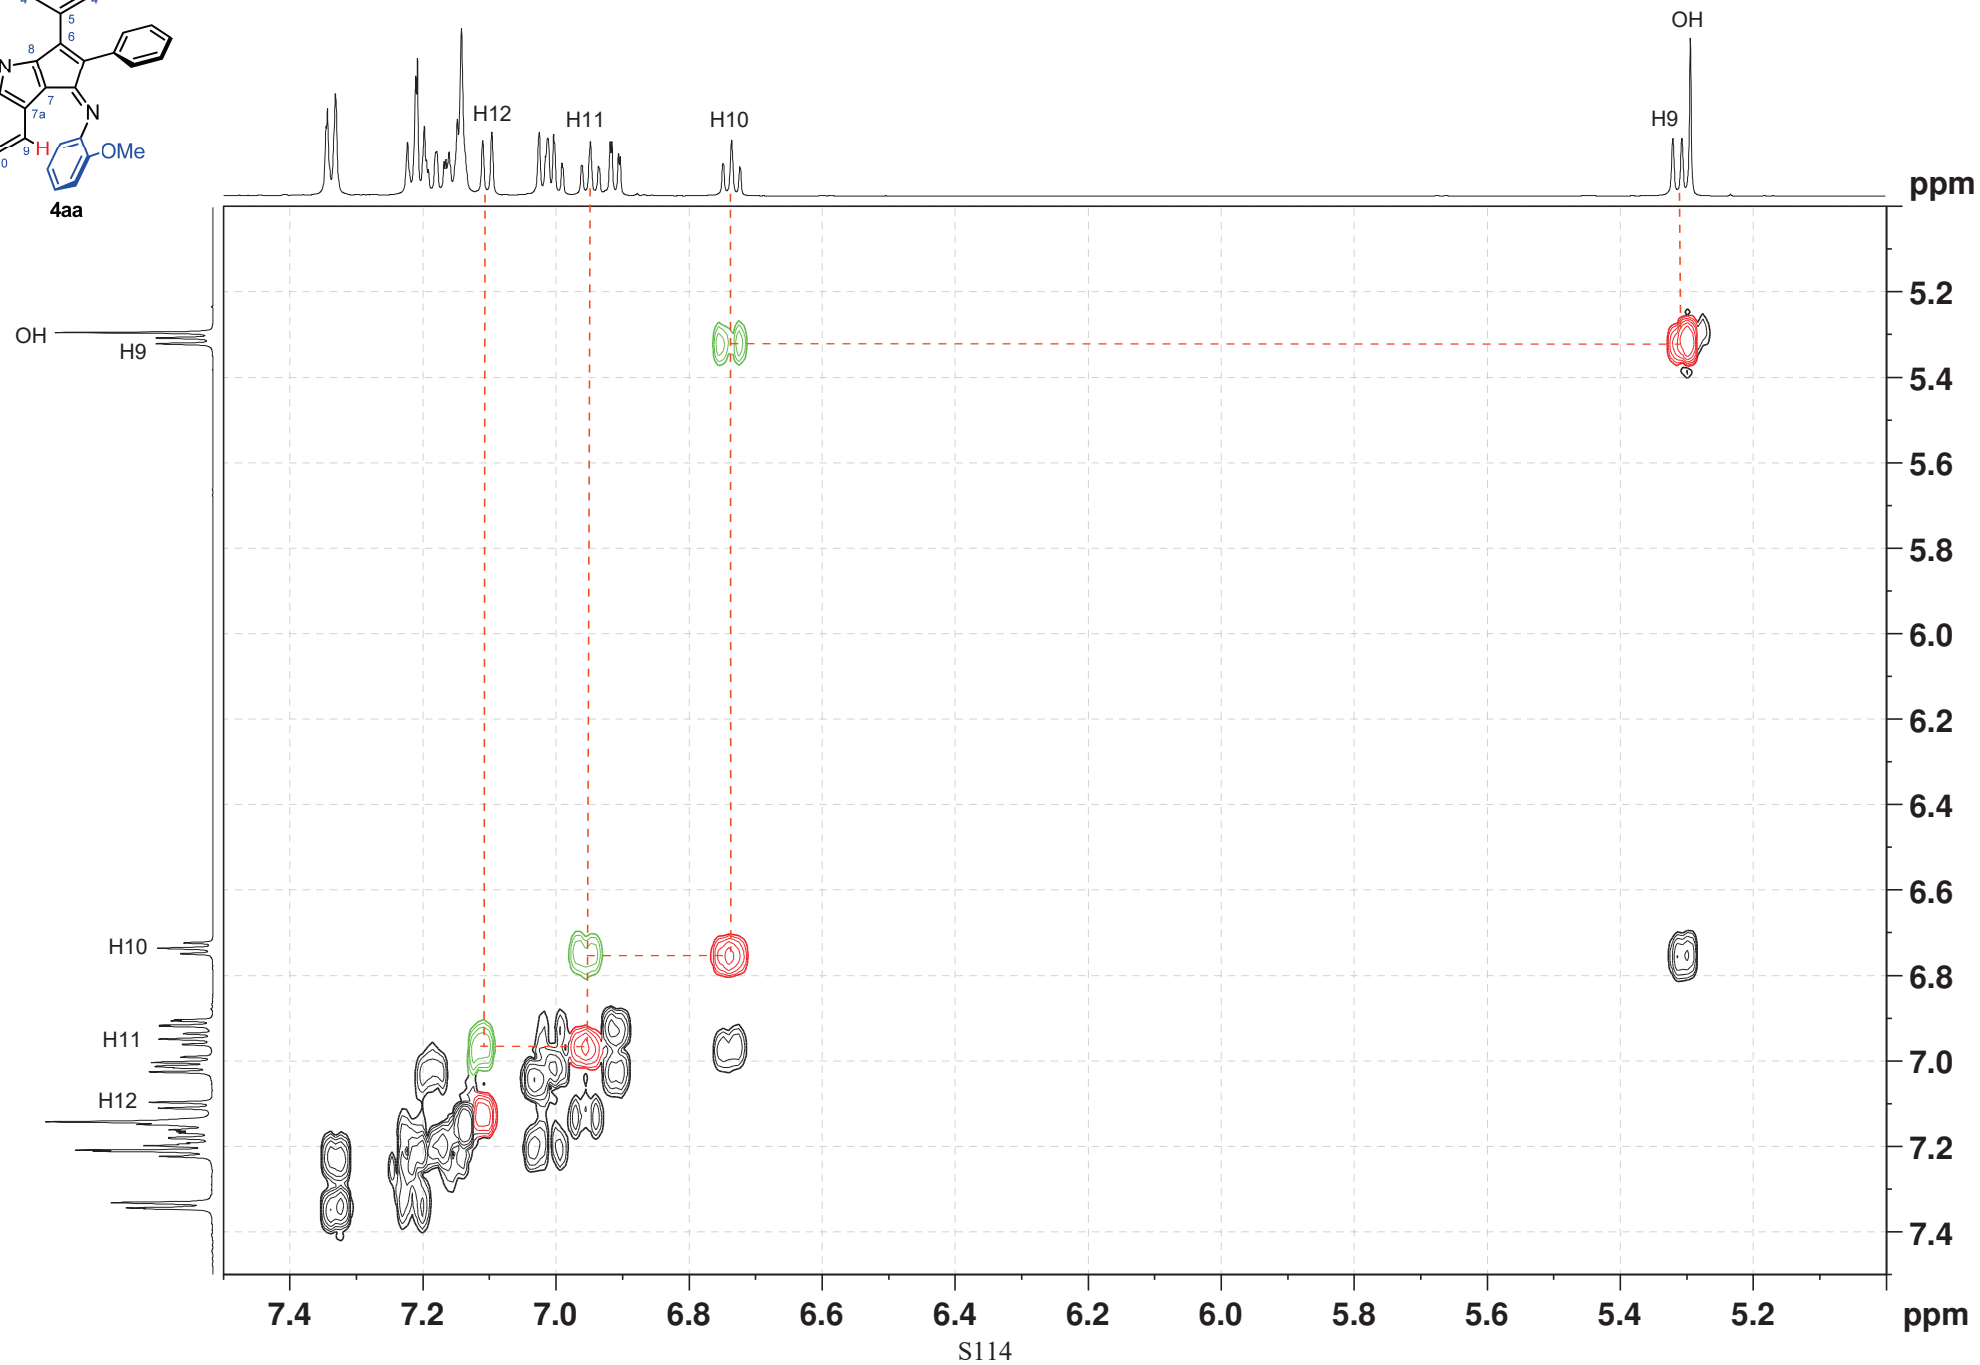

HSQC (600 MHz, CDCl<sub>3</sub>)

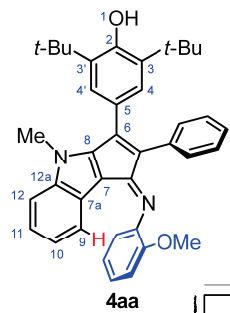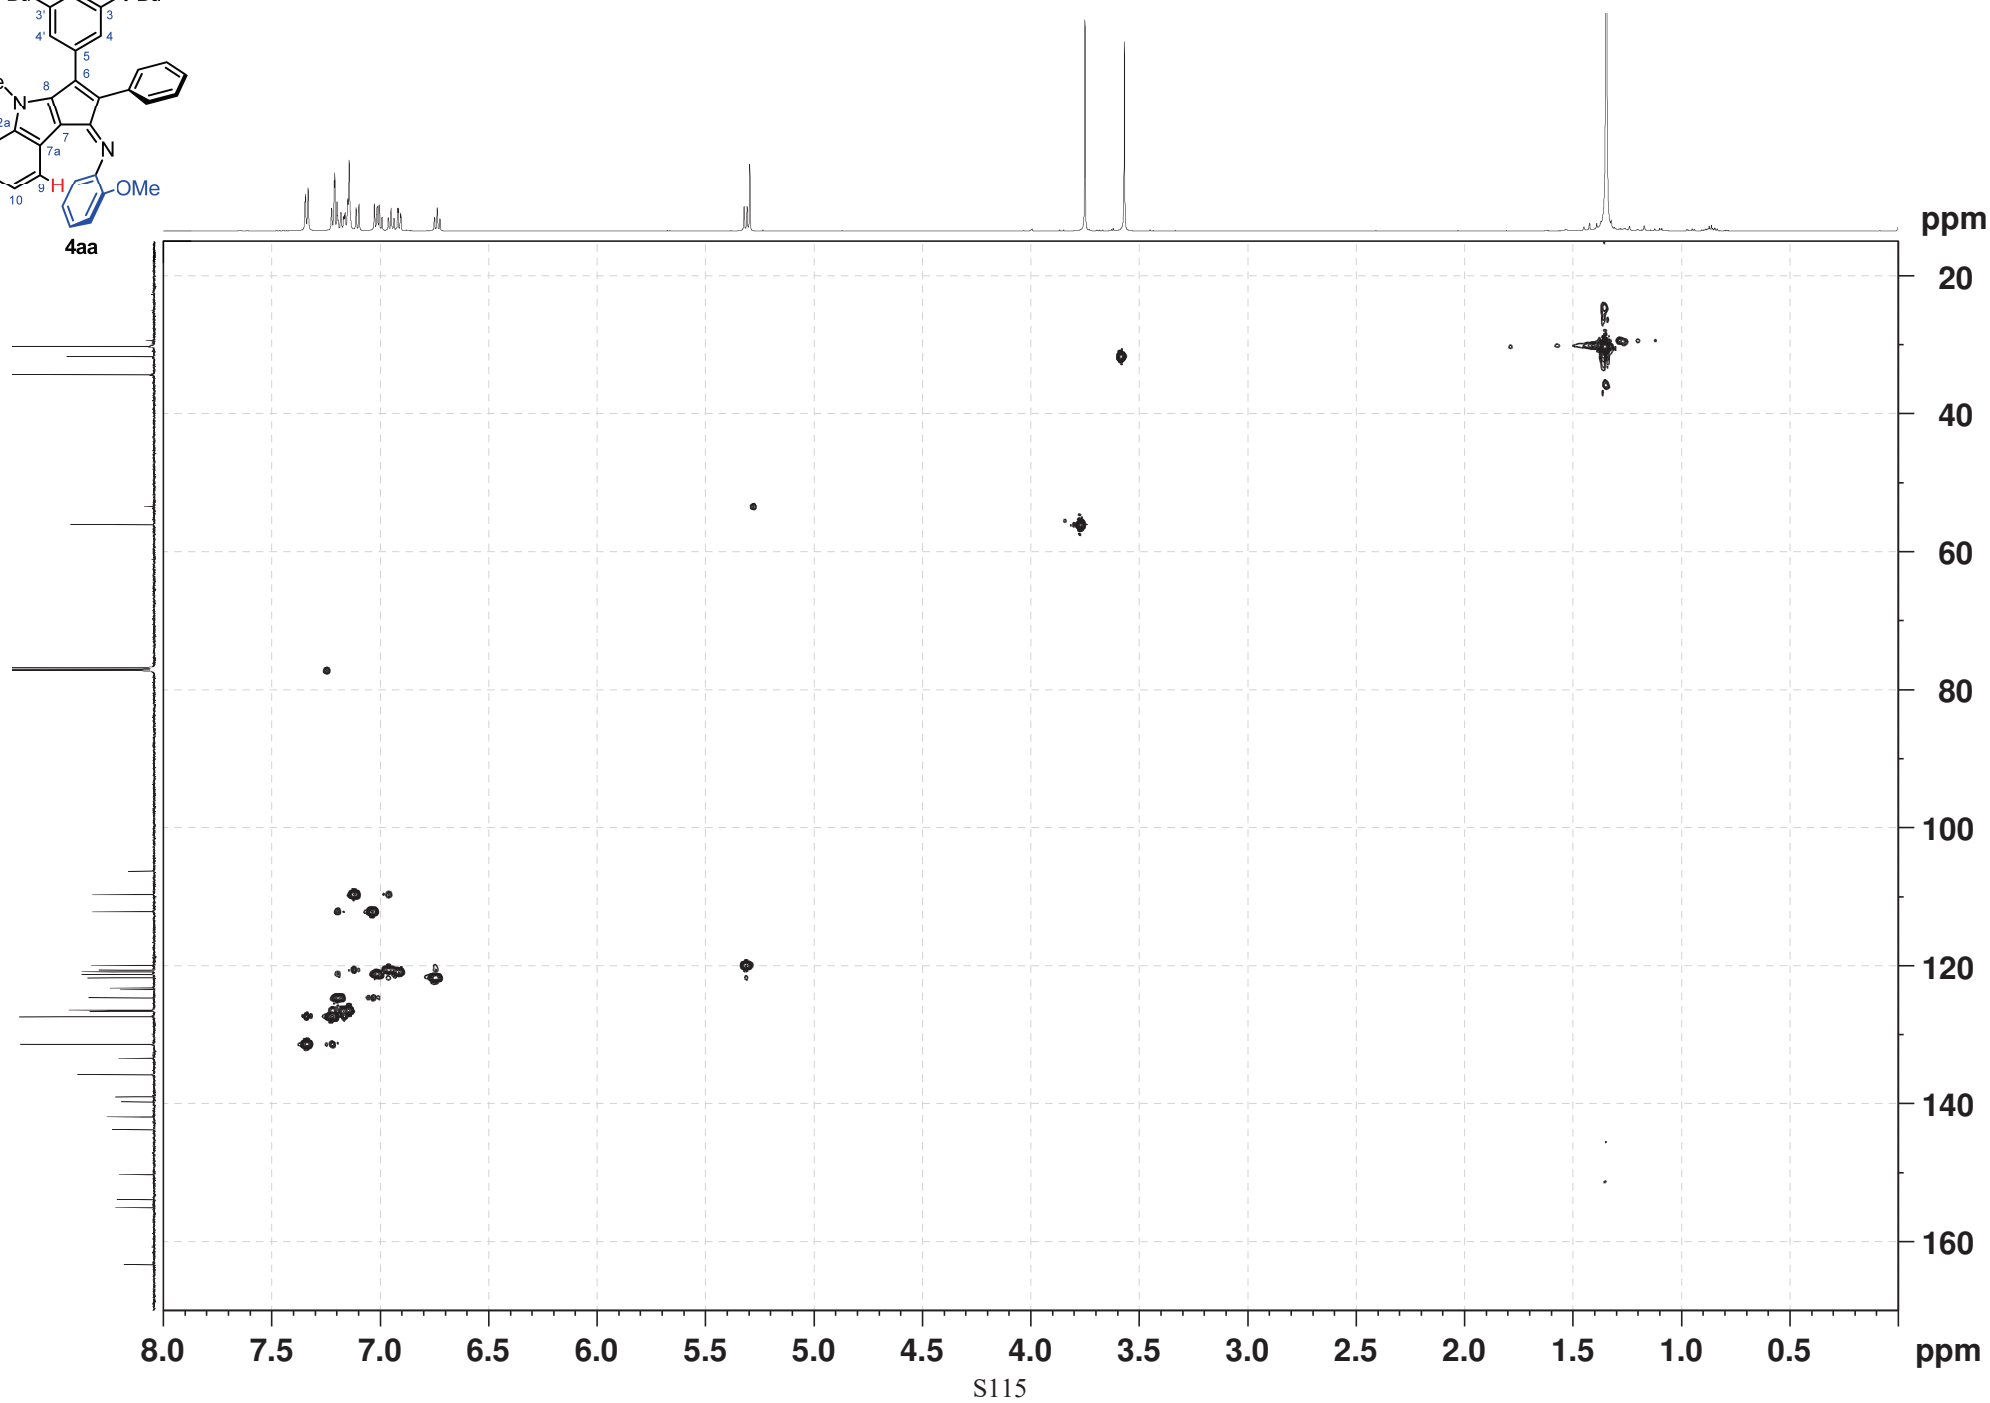

HSQC (600 MHz, CDCl<sub>3</sub>)

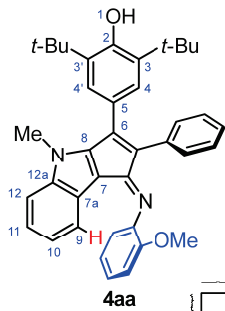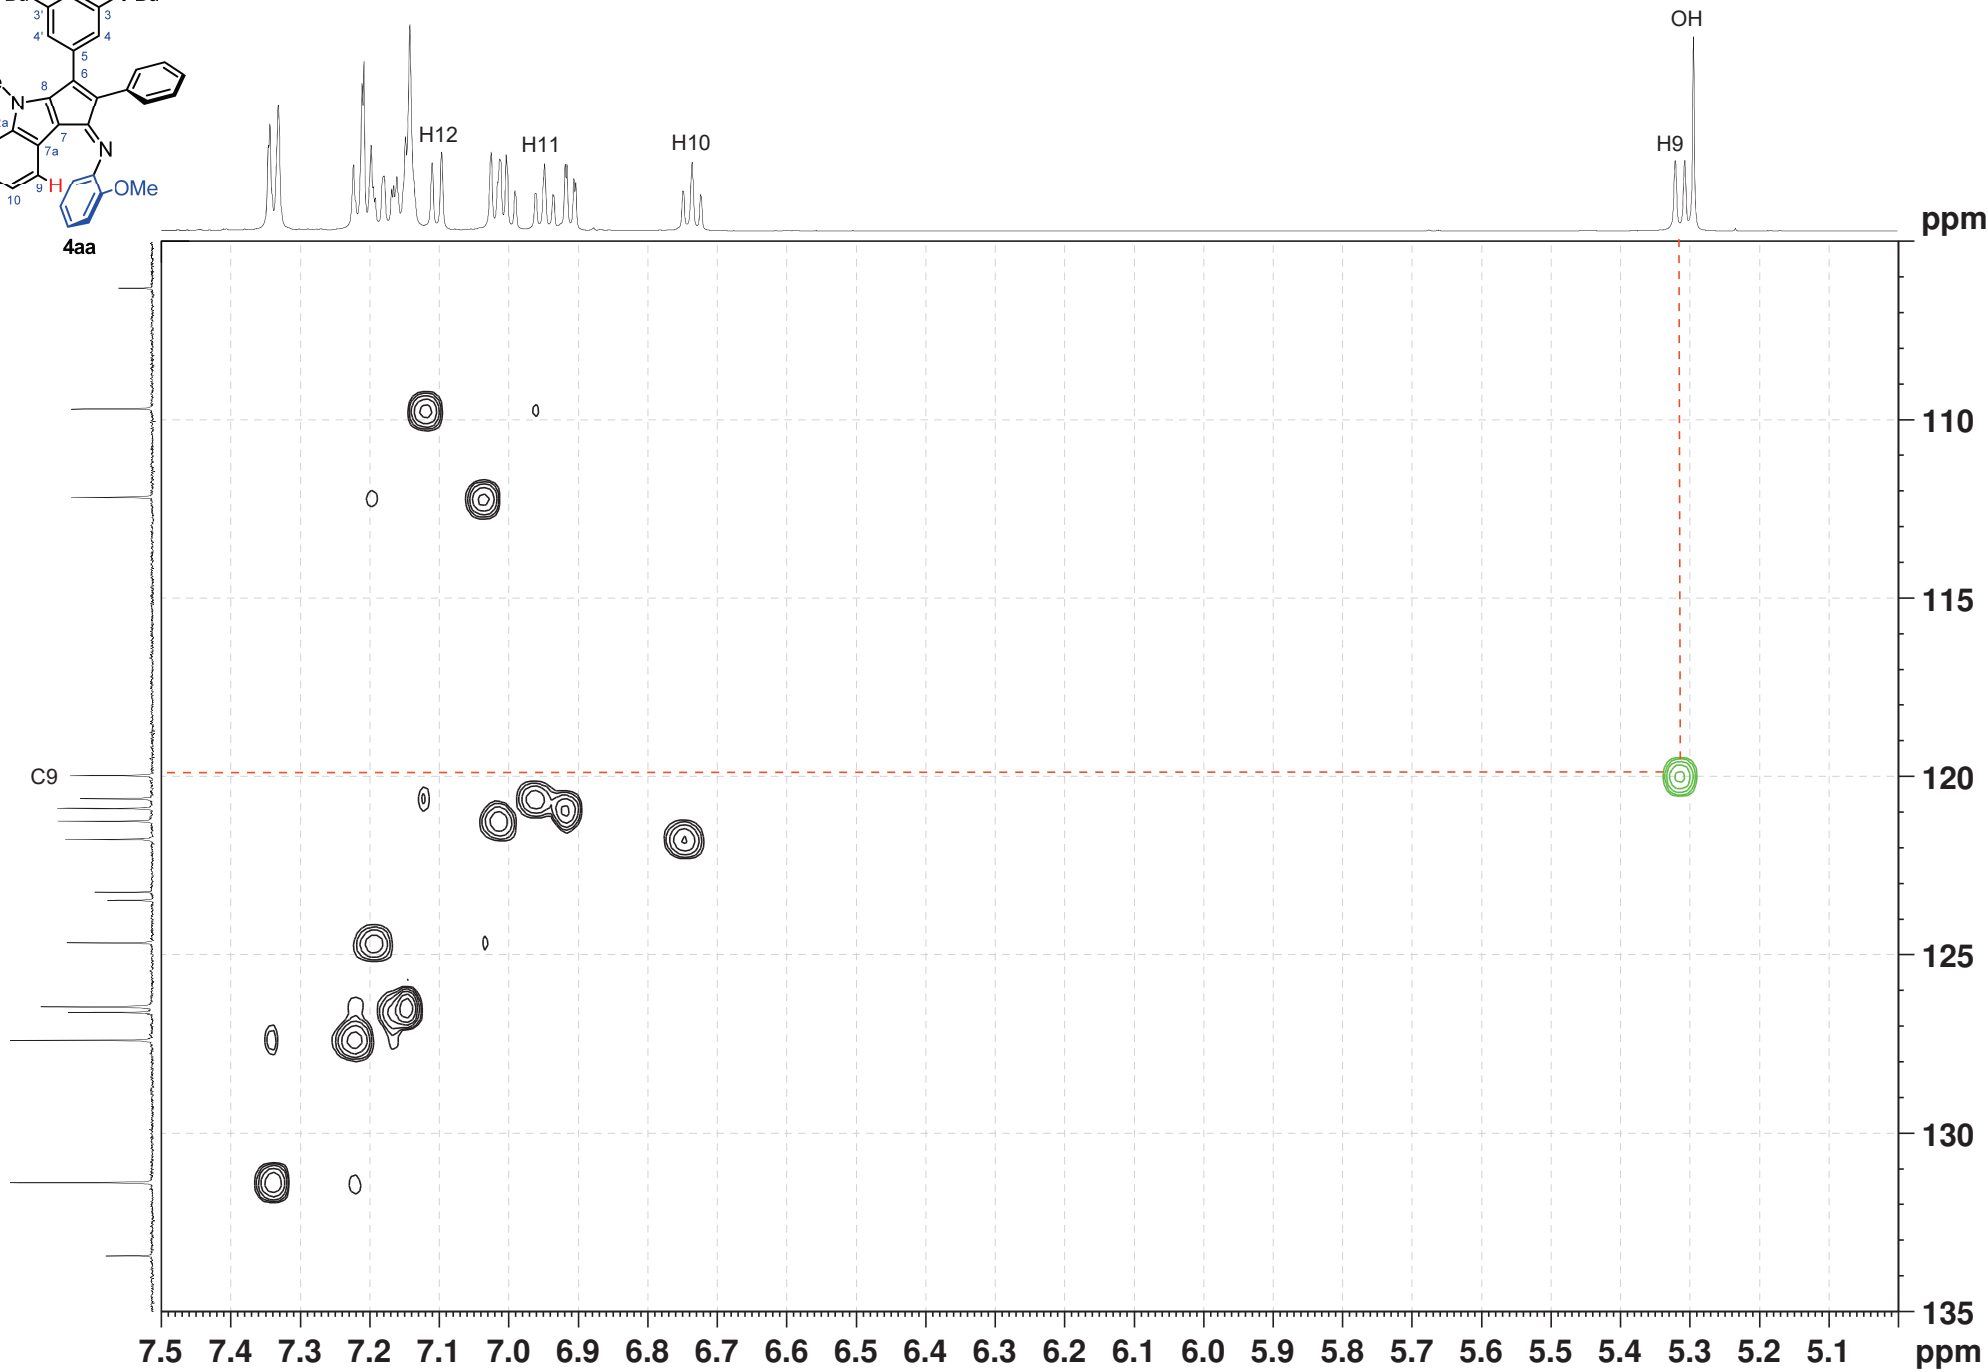



HMBC (600 MHz, CDCl<sub>3</sub>)

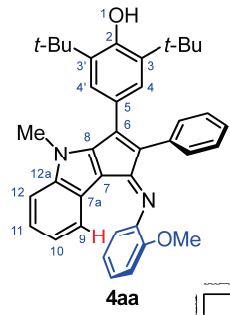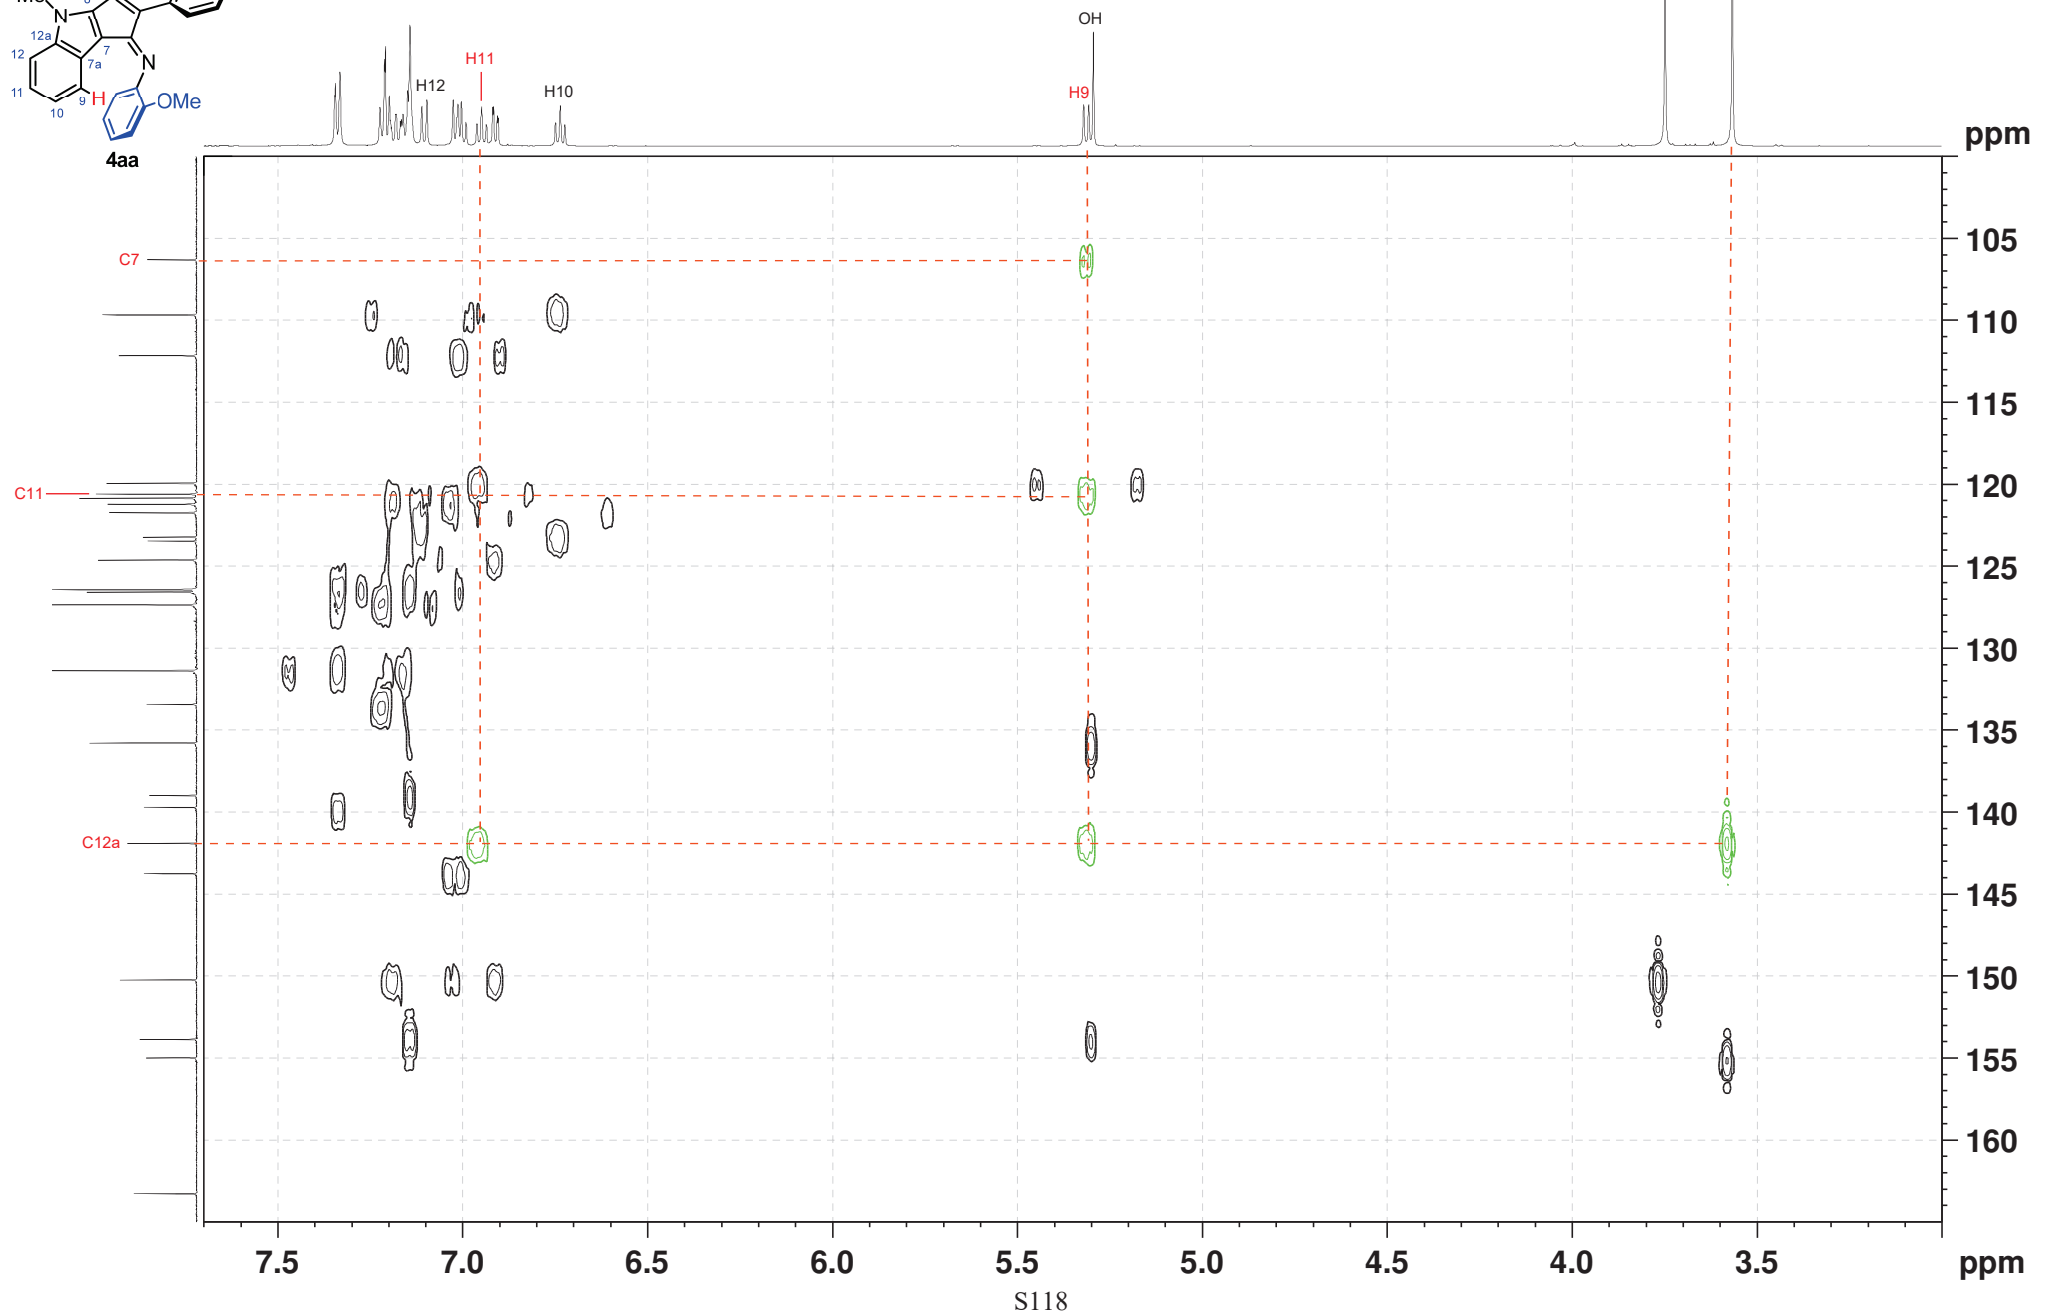

Supplement: d2cc03252j1.pdf [file d2cc03252j1.pdf]
